# Supplementary material for: FOXM1-AKT Positive Regulation Loop Provides Venetoclax Resistance in AML
Source: Front Oncol. 2021 Jul 26;11:696532. doi: 10.3389/fonc.2021.696532 (PMC8350342; doi:10.3389/fonc.2021.696532)
Supplement: Supplementary file 2 [file Table_2.xlsx]

## Sheet: Table legend
Supplementary Table 3.
Transcriptome-wide gene expression changes in KG-1 cells caused by MK-2206 treatment or stable FOXM1 knockdown.

## Sheet: Gene Expression Data
Geneid	Gene name	Transcript ID(s)	Transcript type	Genotype-Treatment: PValue	Genotype-Treatment: QValue	Control-MK2206/Control-DMSO : logFC	Control-MK2206/Control-DMSO : logCPM	Control-MK2206/Control-DMSO : PValue	Control-MK2206/Control-DMSO : QValue	FOXM1-KD-DMSO/Control-DMSO : logFC	FOXM1-KD-DMSO/Control-DMSO : logCPM	FOXM1-KD-DMSO/Control-DMSO : PValue	FOXM1-KD-DMSO/Control-DMSO : QValue
ENSG00000223972	DDX11L1	ENST00000450305.2,ENST00000456328.2	transcribed_unprocessed_pseudogene,processed_transcript	0.61423	0.680069	2.96192	-2.62475	1	1	-5.12548e-15	-3.2253	1	1
ENSG00000227232	WASH7P	ENST00000488147.1	unprocessed_pseudogene	0.0027867	0.00590169	1.53019	2.27284	6.90852e-05	0.000278991	0.762274	1.93051	0.0149364	0.0555515
ENSG00000238009	RP11-34P13.7	ENST00000471248.1,ENST00000466430.5,ENST00000453576.2,ENST00000610542.1,ENST00000477740.5	lincRNA	0.405103	0.507509	2.96192	-2.62475	1	1	2.30325	-3.05558	1	1
ENSG00000233750	CICP27	ENST00000442987.3	processed_pseudogene	0.60401	0.680069	3.00207	-2.62279	1	1	-5.12548e-15	-3.2253	1	1
ENSG00000268903	RP11-34P13.15	ENST00000494149.2	processed_pseudogene	0.66682	0.72874	0	-2.80372	1	1	2.30325	-3.05558	1	1
ENSG00000269981	RP11-34P13.16	ENST00000595919.1	processed_pseudogene	0.661444	0.724116	0	-2.80372	1	1	2.30325	-3.05558	1	1
ENSG00000241860	RP11-34P13.13	ENST00000491962.1,ENST00000466557.6	lincRNA	0.0119178	0.022415	1.24209	-0.750428	0.16624	0.310601	-2.48699	-1.76447	0.0221208	0.0787654
ENSG00000279457	RP11-34P13.18	ENST00000623083.4	unprocessed_pseudogene	4.10624e-06	1.24479e-05	1.19778	1.99149	0.00248683	0.00767245	1.00251	2.02635	0.00740879	0.0298516
ENSG00000228463	AP006222.2	ENST00000634344.1,ENST00000448958.1,ENST00000442116.1,ENST00000424587.6,ENST00000335577.4	lincRNA	0.697905	0.755288	-0.496905	-0.737978	0.699341	0.964234	0.0911407	-0.581735	0.904669	1
ENSG00000236679	RPL23AP24	ENST00000458203.2	processed_pseudogene	0.700049	0.757244	-1.93121	-2.63801	1	1	-0.0370231	-2.90342	1	1
ENSG00000237094	RP4-669L17.10	ENST00000455464.6,ENST00000431321.1,ENST00000599771.6,ENST00000440038.6,ENST00000453935.1,ENST00000423728.5,ENST00000601486.5,ENST00000432964.1,ENST00000616947.2,ENST00000613471.1,ENST00000616311.4,ENST00000601814.5,ENST00000440163.1,ENST00000419160.3,ENST00000455207.5,ENST00000608420.1,ENST00000431812.1	lincRNA	0.264846	0.349502	-0.841088	-0.921768	0.479554	0.704223	-1.84085	-1.26936	0.0272733	0.094586
ENSG00000250575	RP4-669L17.8	ENST00000514436.1	unprocessed_pseudogene	0.510637	0.608648	2.96192	-2.62475	1	1	2.30325	-3.05558	1	1
ENSG00000230021	RP5-857K21.4	ENST00000616585.1,ENST00000441245.5,ENST00000440196.2,ENST00000447954.1,ENST00000634337.1,ENST00000419394.1,ENST00000452176.1,ENST00000440200.5,ENST00000635509.1,ENST00000634833.1,ENST00000414688.5,ENST00000357876.5,ENST00000417636.1	lincRNA	2.28383e-06	7.09952e-06	6.54059	-1.28649	0.000814991	0.00274235	3.15156	-2.90353	0.52202	0.980779
ENSG00000225972	MTND1P23	ENST00000416931.1	unprocessed_pseudogene	5.43289e-61	1.23125e-59	-2.60349	3.30605	5.65987e-06	2.67567e-05	-6.30837	3.13653	5.53736e-22	1.29245e-20
ENSG00000225630	MTND2P28	ENST00000457540.1	unprocessed_pseudogene	2.34708e-12	1.19711e-11	3.91521	6.05867	0.000107751	0.000421572	0.980515	3.74369	0.0156427	0.0578822
ENSG00000237973	MTCO1P12	ENST00000414273.1	unprocessed_pseudogene	3.51231e-50	6.59976e-49	3.06321	7.03138	4.1008e-15	4.83158e-14	0.427015	5.14886	0.0396313	0.130769
ENSG00000229344	MTCO2P12	ENST00000427426.1	unprocessed_pseudogene	5.20763e-06	1.5638e-05	1.42842	3.25606	0.0520432	0.116249	-1.08467	2.07462	0.0395022	0.130399
ENSG00000248527	MTATP6P1	ENST00000514057.1	unprocessed_pseudogene	1.06997e-11	5.20351e-11	1.83618	7.42456	5.28197e-05	0.000217344	-0.257346	6.21571	0.414494	0.860393
ENSG00000198744	MTCO3P12	ENST00000416718.2	unprocessed_pseudogene	1.23237e-05	3.55214e-05	2.60578	2.47384	0.000785539	0.00265161	0.507494	1.14745	0.209085	0.512059
ENSG00000229376	CICP3	ENST00000440782.3	processed_pseudogene	0.0393778	0.0658251	4.45737	-2.31361	0.190109	0.331684	-5.12548e-15	-3.2253	1	1
ENSG00000228327	RP11-206L10.2	ENST00000428504.2,ENST00000506640.2	transcribed_unprocessed_pseudogene,processed_transcript	2.00777e-55	4.12379e-54	3.72939	5.79989	1.18647e-34	4.51989e-33	0.557608	3.40395	0.0155513	0.0575839
ENSG00000237491	RP11-206L10.9	ENST00000434264.6,ENST00000585826.1,ENST00000589899.5,ENST00000593022.5,ENST00000412115.1,ENST00000429505.5,ENST00000586928.5,ENST00000590848.5,ENST00000588951.5,ENST00000609830.1,ENST00000587530.5,ENST00000586288.1,ENST00000585745.5,ENST00000589531.5,ENST00000591702.1,ENST00000585768.5,ENST00000591440.5,ENST00000443772.1,ENST00000592547.1,ENST00000457084.1	lincRNA	0.00215057	0.00463203	1.45366	2.57686	3.08463e-05	0.000131052	0.812369	2.30543	0.00566093	0.0234802
ENSG00000230092	RP11-206L10.8	ENST00000590817.3,ENST00000447500.4	transcribed_unprocessed_pseudogene,processed_transcript	0.00322026	0.00675385	1.2737	0.481519	0.0152577	0.0395021	1.35589	0.735449	0.00528279	0.0220604
ENSG00000177757	FAM87B	ENST00000326734.2	lincRNA	0.00454055	0.00929547	5.06943	-2.05945	0.102611	0.203504	-5.12548e-15	-3.2253	1	1
ENSG00000228794	LINC01128	ENST00000609009.5,ENST00000441765.5,ENST00000445118.6,ENST00000622921.1,ENST00000416570.5,ENST00000415295.1,ENST00000448975.6,ENST00000608189.4,ENST00000623070.3,ENST00000610067.5,ENST00000609139.5,ENST00000623808.3,ENST00000425657.1,ENST00000449005.5,ENST00000624927.3	lincRNA,retained_intron	0.217622	0.292884	0.595879	4.11038	0.030852	0.0737315	-0.270357	3.76973	0.223645	0.541186
ENSG00000225880	LINC00115	ENST00000473798.1	lincRNA	2.13606e-39	3.13406e-38	3.92374	3.9356	5.45748e-23	1.09286e-21	0.997273	1.70022	0.00699113	0.0283904
ENSG00000234711	TUBB8P11	ENST00000415481.1	unprocessed_pseudogene	0.176932	0.244445	3.00207	-2.62279	1	1	-5.12548e-15	-3.2253	1	1
ENSG00000283040	FAM166AP3	ENST00000635557.1	transcribed_unprocessed_pseudogene	0.61423	0.680069	2.96192	-2.62475	1	1	-5.12548e-15	-3.2253	1	1
ENSG00000272438	RP11-54O7.16	ENST00000607769.1	lincRNA	0.0831545	0.12953	2.8389	-2.07243	0.16278	0.304867	-0.0370231	-2.90342	1	1
ENSG00000230699	RP11-54O7.1	ENST00000448179.1	lincRNA	0.0485403	0.0795457	0.451143	-0.977698	0.787015	1	-2.60065	-1.70016	0.0447441	0.14492
ENSG00000223764	RP11-54O7.3	ENST00000417705.1,ENST00000432961.1,ENST00000609207.1	lincRNA,retained_intron	6.41664e-50	1.19867e-48	6.06395	1.33732	7.39798e-20	1.23751e-18	-3.72154	-2.76541	0.283029	0.635084
ENSG00000187634	SAMD11	ENST00000622503.4,ENST00000341065.8,ENST00000620200.4,ENST00000616016.4,ENST00000617307.4,ENST00000474461.1,ENST00000420190.6,ENST00000466827.1,ENST00000342066.7,ENST00000616125.4,ENST00000455979.1,ENST00000464948.1,ENST00000478729.1,ENST00000618323.4,ENST00000618779.4,ENST00000437963.5,ENST00000618181.4	processed_transcript,retained_intron,protein_coding	1.48325e-30	1.70857e-29	5.75546	2.58593	6.9454e-20	1.16363e-18	-5.23238	-2.1365	0.0387615	0.128256
ENSG00000188976	NOC2L	ENST00000469563.1,ENST00000496938.1,ENST00000483767.5,ENST00000477976.5,ENST00000487214.1,ENST00000327044.6	processed_transcript,retained_intron,protein_coding	5.25721e-07	1.7338e-06	-0.196527	6.5482	0.493626	0.722335	0.70481	7.14275	0.00444818	0.0189183
ENSG00000187961	KLHL17	ENST00000466300.1,ENST00000622660.1,ENST00000481067.1,ENST00000463212.1,ENST00000338591.7	nonsense_mediated_decay,retained_intron,protein_coding	0.000156034	0.000393808	1.28733	3.55383	0.00102156	0.00338439	1.22595	3.64924	9.34428e-06	6.38789e-05
ENSG00000187583	PLEKHN1	ENST00000491024.1,ENST00000379410.7,ENST00000379409.6,ENST00000379407.7,ENST00000480267.1	retained_intron,protein_coding	3.01912e-23	2.70546e-22	7.98933	-0.057447	1.22504e-08	7.958e-08	4.37064	-2.52562	0.0777751	0.230388
ENSG00000187642	PERM1	ENST00000479361.1,ENST00000433179.3,ENST00000341290.6	retained_intron,protein_coding	9.71398e-14	5.40792e-13	6.95718	-0.947525	1.66312e-05	7.33764e-05	-5.12548e-15	-3.2253	1	1
ENSG00000272512	RP11-54O7.17	ENST00000606034.1	lincRNA	5.2933e-08	1.92178e-07	6.7952	-1.02303	0.00378882	0.0112303	-5.12548e-15	-3.2253	1	1
ENSG00000188290	HES4	ENST00000484667.2,ENST00000481869.1,ENST00000304952.10,ENST00000428771.6	retained_intron,protein_coding	1.44053e-08	5.48773e-08	7.48261	-0.505038	1.68466e-07	9.63353e-07	-5.12548e-15	-3.2253	1	1
ENSG00000187608	ISG15	ENST00000379389.4,ENST00000624697.3,ENST00000624652.1	protein_coding	1.91074e-11	9.13957e-11	2.23997	3.82915	2.53285e-08	1.58961e-07	-0.629366	2.20001	0.0293142	0.100769
ENSG00000231702	RP11-54O7.10	ENST00000423619.2	processed_pseudogene	0.60401	0.680069	3.00207	-2.62279	1	1	-5.12548e-15	-3.2253	1	1
ENSG00000188157	AGRN	ENST00000492947.1,ENST00000479707.1,ENST00000477585.1,ENST00000461111.1,ENST00000466223.1,ENST00000419249.2,ENST00000379370.6,ENST00000478677.1,ENST00000469403.1,ENST00000620552.4	retained_intron,protein_coding	2.47279e-17	1.70134e-16	4.73252	4.22887	3.94034e-25	9.01938e-24	3.68629	3.39638	1.04115e-13	1.5248e-12
ENSG00000217801	RP11-465B22.3	ENST00000427998.5,ENST00000394517.6,ENST00000451054.1,ENST00000433695.1,ENST00000412397.2,ENST00000456409.5	transcribed_unprocessed_pseudogene,processed_transcript	3.2197e-17	2.20245e-16	3.97355	1.97788	3.09781e-18	4.63874e-17	-6.36218	-1.41533	2.46432e-05	0.000158477
ENSG00000273443	RP11-54O7.18	ENST00000442292.2	lincRNA	6.70871e-13	3.54314e-12	4.48617	0.449972	3.36485e-09	2.32459e-08	-4.41392	-2.52414	0.0778661	0.230388
ENSG00000237330	RNF223	ENST00000453464.2	protein_coding	3.46046e-12	1.74303e-11	7.06747	-0.833645	0.000118149	0.000459779	-5.12548e-15	-3.2253	1	1
ENSG00000131591	C1orf159	ENST00000434641.5,ENST00000379339.5,ENST00000477196.5,ENST00000462097.5,ENST00000487177.5,ENST00000480643.1,ENST00000427787.5,ENST00000473600.1,ENST00000475119.5,ENST00000464905.1,ENST00000472741.5,ENST00000442117.5,ENST00000379319.5,ENST00000465822.5,ENST00000482816.5,ENST00000467751.5,ENST00000379325.7,ENST00000379320.5,ENST00000421241.6	nonsense_mediated_decay,processed_transcript,retained_intron,protein_coding	1.09298e-08	4.21642e-08	1.62306	4.50713	2.99282e-06	1.46549e-05	0.812157	4.07093	0.000100487	0.000587753
ENSG00000223823	LINC01342	ENST00000416774.1	lincRNA	0.60401	0.680069	3.00207	-2.62279	1	1	-5.12548e-15	-3.2253	1	1
ENSG00000272141	RP11-465B22.8	ENST00000606993.1	lincRNA	0.000558052	0.00131316	5.73208	-1.82242	0.0734927	0.157225	-5.12548e-15	-3.2253	1	1
ENSG00000162571	TTLL10	ENST00000379289.5,ENST00000486379.1,ENST00000514695.1,ENST00000460998.1,ENST00000379290.5,ENST00000379288.3,ENST00000506177.1	nonsense_mediated_decay,processed_transcript,retained_intron,protein_coding	1.69779e-52	3.33514e-51	-1.91422	2.27622	9.31344e-07	4.86898e-06	-10.1377	1.94423	6.15112e-37	2.42111e-35
ENSG00000186891	TNFRSF18	ENST00000486728.5,ENST00000379265.5,ENST00000328596.10,ENST00000379268.6	protein_coding	5.35167e-52	1.03853e-50	-3.22859	1.93368	1.20415e-07	6.99957e-07	-9.91896	1.73108	2.34985e-32	8.11168e-31
ENSG00000186827	TNFRSF4	ENST00000453580.1,ENST00000379236.3,ENST00000497869.5	processed_transcript,retained_intron,protein_coding	3.33188e-11	1.57164e-10	0.353386	0.456815	0.57992	0.826306	-3.12103	-0.388238	3.71509e-05	0.000233058
ENSG00000078808	SDF4	ENST00000494748.1,ENST00000360001.10,ENST00000459994.2,ENST00000465727.5,ENST00000403997.2,ENST00000478938.1,ENST00000263741.11	nonsense_mediated_decay,processed_transcript,retained_intron,protein_coding	5.40731e-07	1.78165e-06	0.878344	6.89173	0.00245086	0.00756875	0.356141	6.68458	0.0240474	0.0844047
ENSG00000176022	B3GALT6	ENST00000379198.3	protein_coding	0.124134	0.186273	-0.0534992	5.71208	0.868721	1	-0.322412	5.69188	0.175219	0.442194
ENSG00000184163	C1QTNF12	ENST00000486627.1,ENST00000478606.1,ENST00000462849.1,ENST00000468365.1,ENST00000330388.2	retained_intron,protein_coding	1.05484e-10	4.77777e-10	4.21923	0.850447	5.1961e-09	3.53008e-08	0.743771	-1.31921	0.38058	0.806314
ENSG00000260179	RP5-902P8.12	ENST00000565563.1	lincRNA	7.37197e-07	2.40227e-06	2.96917	-0.0565808	8.36202e-06	3.85125e-05	-0.861877	-1.7655	0.515456	0.980779
ENSG00000160087	UBE2J2	ENST00000488418.2,ENST00000349431.10,ENST00000360466.6,ENST00000466752.5,ENST00000347370.6,ENST00000464036.5,ENST00000422076.5,ENST00000400930.8,ENST00000471154.1,ENST00000509720.5,ENST00000435198.5,ENST00000461142.3,ENST00000450390.6,ENST00000502382.1,ENST00000467339.1,ENST00000477894.5,ENST00000473215.5,ENST00000400929.6,ENST00000491779.5,ENST00000503294.5	nonsense_mediated_decay,processed_transcript,retained_intron,protein_coding	9.25715e-06	2.70677e-05	1.22539	6.59227	0.000118692	0.000461779	0.120146	6.02615	0.529254	0.991286
ENSG00000230415	LINC01786	ENST00000453732.1,ENST00000434139.1	lincRNA	0.190594	0.26082	0.0882888	-0.213331	1	1	-1.03386	-0.579835	0.235518	0.564337
ENSG00000162572	SCNN1D	ENST00000470022.1,ENST00000325425.12,ENST00000379099.3,ENST00000467651.2,ENST00000400928.7,ENST00000338555.6,ENST00000379116.9,ENST00000379101.8	nonsense_mediated_decay,processed_transcript,protein_coding	2.26127e-05	6.32356e-05	0.493416	1.33909	0.294398	0.479929	-2.2814	0.508364	3.25793e-06	2.36082e-05
ENSG00000131584	ACAP3	ENST00000479108.5,ENST00000478065.5,ENST00000472541.5,ENST00000470659.1,ENST00000438966.1,ENST00000493992.1,ENST00000379037.6,ENST00000492936.5,ENST00000354980.7,ENST00000353662.4,ENST00000476572.1,ENST00000467278.5,ENST00000354700.9	nonsense_mediated_decay,processed_transcript,retained_intron,protein_coding	5.06298e-07	1.67285e-06	2.18231	5.43268	1.81502e-11	1.58086e-10	1.13446	4.7631	4.42139e-08	3.98997e-07
ENSG00000169972	PUSL1	ENST00000470520.5,ENST00000493657.1,ENST00000467712.1,ENST00000379031.9,ENST00000463758.1	processed_transcript,retained_intron,protein_coding	0.0232028	0.0414071	0.691036	4.35838	0.0717865	0.153945	0.620288	4.43146	0.0210629	0.0754944
ENSG00000127054	INTS11	ENST00000498173.2,ENST00000525164.5,ENST00000526904.5,ENST00000526797.5,ENST00000429572.5,ENST00000419704.5,ENST00000430786.5,ENST00000531292.5,ENST00000498476.6,ENST00000618806.4,ENST00000531019.5,ENST00000532772.5,ENST00000527383.5,ENST00000497304.6,ENST00000527098.5,ENST00000528879.5,ENST00000470030.6,ENST00000478641.5,ENST00000496353.1,ENST00000450926.6,ENST00000532952.5,ENST00000323275.10,EN…	nonsense_mediated_decay,processed_transcript,retained_intron,protein_coding	0.00116908	0.00262402	0.44107	6.41087	0.11553	0.22648	0.183162	6.37562	0.26113	0.614198
ENSG00000240731	RP5-890O3.9	ENST00000444968.1	sense_intronic	0.23031	0.308	0.486143	0.832472	0.32739	0.499689	0.603151	1.01976	0.163571	0.417774
ENSG00000224051	CPTP	ENST00000343938.8,ENST00000488011.1,ENST00000464957.1	processed_transcript,protein_coding	0.481137	0.581017	-0.171123	4.11692	0.572786	0.817572	-0.341169	4.13932	0.113259	0.314064
ENSG00000169962	TAS1R3	ENST00000339381.5	protein_coding	1.56998e-05	4.4693e-05	2.33913	0.380314	0.000420662	0.00149237	-0.876135	-1.05416	0.29724	0.659296
ENSG00000107404	DVL1	ENST00000610709.2,ENST00000631679.1,ENST00000378888.9,ENST00000634054.1,ENST00000472445.1,ENST00000633096.1,ENST00000632445.1,ENST00000378891.9	retained_intron,protein_coding	0.134708	0.2003	0.578698	5.72728	0.0696321	0.149726	0.12599	5.58368	0.464255	0.940323
ENSG00000162576	MXRA8	ENST00000473097.5,ENST00000474033.5,ENST00000464351.1,ENST00000478517.5,ENST00000477278.3,ENST00000445648.5,ENST00000342753.8,ENST00000460473.1,ENST00000309212.10,ENST00000476718.1	retained_intron,protein_coding	9.31623e-16	5.85811e-15	7.71697	-0.308523	4.02341e-08	2.46598e-07	-5.12548e-15	-3.2253	1	1
ENSG00000175756	AURKAIP1	ENST00000378853.3,ENST00000489799.1,ENST00000321751.9,ENST00000338370.7,ENST00000496905.1,ENST00000338338.9	processed_transcript,protein_coding	4.115e-05	0.000111754	0.469279	5.50741	0.184638	0.331684	0.399705	5.57565	0.181947	0.456329
ENSG00000223663	NDUFB4P8	ENST00000435351.2	processed_pseudogene	0.0441632	0.0730094	1.45697	-1.68919	0.384775	0.57843	-0.956928	-2.41754	0.728163	1
ENSG00000221978	CCNL2	ENST00000463895.1,ENST00000418865.6,ENST00000492998.5,ENST00000497013.1,ENST00000425598.2,ENST00000488340.5,ENST00000496007.5,ENST00000469113.5,ENST00000408952.8,ENST00000471930.5,ENST00000505849.5,ENST00000480479.5,ENST00000480646.1,ENST00000482365.5,ENST00000482621.5,ENST00000408918.8,ENST00000481223.6,ENST00000463260.5,ENST00000400809.7,ENST00000473872.5	nonsense_mediated_decay,processed_transcript,retained_intron,protein_coding	1.41707e-19	1.08484e-18	2.22551	8.18921	4.38047e-15	5.14593e-14	0.35257	6.98045	0.0202922	0.0730345
ENSG00000224870	RP4-758J18.2	ENST00000572242.1,ENST00000418833.2	retained_intron	0.000845774	0.00193237	0.846978	5.0157	0.00615073	0.0173474	0.264787	4.78404	0.146629	0.390652
ENSG00000242485	MRPL20	ENST00000493287.5,ENST00000477686.1,ENST00000344843.11,ENST00000482352.1,ENST00000492508.1,ENST00000487659.1	processed_transcript,retained_intron,protein_coding	1.33851e-11	6.45552e-11	1.06078	5.29689	9.0905e-05	0.000360291	0.830447	5.25892	0.00295446	0.0130855
ENSG00000272455	RP4-758J18.13	ENST00000607307.1	lincRNA	3.61722e-13	1.9405e-12	0.0265792	1.89752	1	1	1.83054	3.1463	1.7044e-11	2.1099e-10
ENSG00000235098	ANKRD65	ENST00000520296.5,ENST00000454272.2,ENST00000537107.5,ENST00000427211.3,ENST00000442470.1	protein_coding	0.002243	0.00481815	2.7851	-1.40501	0.0503284	0.112781	-3.72133	-2.76543	0.283029	0.635084
ENSG00000205116	TMEM88B	ENST00000378821.3	protein_coding	0.167736	0.239078	0	-2.80372	1	1	-5.12548e-15	-3.2253	1	1
ENSG00000225285	LINC01770	ENST00000454562.1,ENST00000434150.1,ENST00000417917.1,ENST00000430109.1	lincRNA	0.000577596	0.00135666	4.05772	-1.55222	0.00248836	0.00767494	-2.34027	-3.05521	1	1
ENSG00000179403	VWA1	ENST00000476993.1,ENST00000338660.5,ENST00000495558.1,ENST00000471398.1	protein_coding	1.26495e-11	6.11453e-11	5.50802	-0.512153	1.3498e-07	7.80514e-07	-2.34027	-3.05521	1	1
ENSG00000215915	ATAD3C	ENST00000475091.2,ENST00000378785.6,ENST00000484537.2	retained_intron,protein_coding	0.000729428	0.00168764	4.17254	-1.47021	0.00220136	0.00685313	1.34188	-2.64043	0.656024	1
ENSG00000160072	ATAD3B	ENST00000472194.6,ENST00000474481.1,ENST00000485748.5,ENST00000378736.3,ENST00000308647.7	processed_transcript,retained_intron,protein_coding	8.49495e-28	8.91859e-27	2.4407	6.97134	7.99454e-19	1.24127e-17	1.16555	6.09738	7.34741e-07	5.77116e-06
ENSG00000197785	ATAD3A	ENST00000339113.8,ENST00000378756.7,ENST00000400830.3,ENST00000429957.1,ENST00000536055.5,ENST00000378755.9,ENST00000439513.1	retained_intron,protein_coding	3.19819e-10	1.39812e-09	0.653757	5.89681	0.0168845	0.0433213	1.09011	6.28765	0.000550585	0.00285
ENSG00000205090	TMEM240	ENST00000624426.1,ENST00000425828.1,ENST00000378733.8	protein_coding	0.339236	0.436317	0.119309	0.916366	0.87186	1	-0.649253	0.671337	0.158599	0.408127
ENSG00000160075	SSU72	ENST00000378725.3,ENST00000291386.3,ENST00000359060.5,ENST00000378726.1	retained_intron,protein_coding	0.0570308	0.0920734	0.113835	6.7063	0.657644	0.923658	-0.0405855	6.73438	0.791791	1
ENSG00000215014	RP5-832C2.5	ENST00000366221.3	lincRNA	1.33485e-43	2.18269e-42	4.25869	3.56352	4.72825e-34	1.74113e-32	0.777594	0.912116	0.0705256	0.212747
ENSG00000274481	RP11-345P4.11	ENST00000621860.1	processed_pseudogene	0.61423	0.680069	2.96192	-2.62475	1	1	-5.12548e-15	-3.2253	1	1
ENSG00000228594	FNDC10	ENST00000422725.3	protein_coding	0.000374695	0.000900302	-1.49634	2.22462	0.0102254	0.02746	-1.69918	2.19196	9.17736e-06	6.2778e-05
ENSG00000197530	MIB2	ENST00000507082.1,ENST00000508148.1,ENST00000506488.5,ENST00000355826.9,ENST00000505370.1,ENST00000503789.5,ENST00000514363.1,ENST00000486072.1,ENST00000508455.1,ENST00000518681.5,ENST00000378708.5,ENST00000489635.5,ENST00000477990.1,ENST00000473511.5,ENST00000512004.1,ENST00000502470.5,ENST00000511502.5,ENST00000514234.5,ENST00000464570.1,ENST00000378712.5,ENST00000479659.5,ENST00000507229.5,ENS…	nonsense_mediated_decay,processed_transcript,retained_intron,protein_coding	2.52431e-14	1.45914e-13	2.40198	6.82077	1.85055e-13	1.91829e-12	-0.412014	5.0933	0.099992	0.282788
ENSG00000189409	MMP23B	ENST00000489782.1,ENST00000435358.5,ENST00000356026.9,ENST00000490017.1,ENST00000378675.7,ENST00000512731.5,ENST00000486400.1,ENST00000479814.5,ENST00000503792.1,ENST00000472264.1	nonsense_mediated_decay,retained_intron,protein_coding	5.53454e-05	0.000147921	3.68836	-1.23816	0.00514793	0.014869	-3.18992	-2.90309	0.52202	0.980779
ENSG00000248333	CDK11B	ENST00000626918.2,ENST00000341028.8,ENST00000407249.7,ENST00000611150.3,ENST00000341832.10,ENST00000629312.2,ENST00000340677.9,ENST00000629289.2,ENST00000615951.4	nonsense_mediated_decay,processed_transcript,protein_coding	0.0549962	0.0890672	0.744134	4.96165	0.00540402	0.0154898	-0.0489642	4.63106	0.818835	1
ENSG00000189339	SLC35E2B	ENST00000480991.1,ENST00000611123.1,ENST00000614300.4,ENST00000481276.1,ENST00000617444.4	retained_intron,protein_coding	0.142949	0.211218	-0.45885	6.65722	0.145697	0.27604	0.202126	7.07688	0.351665	0.755557
ENSG00000269737	RP11-345P4.6	ENST00000596308.1,ENST00000597891.1	transcribed_processed_pseudogene,processed_transcript	0.61423	0.680069	2.96192	-2.62475	1	1	-5.12548e-15	-3.2253	1	1
ENSG00000215914	MMP23A	ENST00000234610.5	unprocessed_pseudogene	0.150424	0.221049	-0.237626	-2.22004	1	1	-3.72154	-2.76541	0.283029	0.635084
ENSG00000008128	CDK11A	ENST00000460465.5,ENST00000468800.5,ENST00000478901.1,ENST00000509982.5,ENST00000357760.6,ENST00000492390.5,ENST00000356937.7,ENST00000498810.1,ENST00000404249.7,ENST00000464748.1,ENST00000468397.1,ENST00000474916.1,ENST00000358779.9,ENST00000378638.6,ENST00000491311.1,ENST00000495016.5,ENST00000489300.1,ENST00000479362.1,ENST00000356200.7,ENST00000378633.5,ENST00000463652.5,ENST00000487462.1,ENS…	nonsense_mediated_decay,processed_transcript,retained_intron,protein_coding	6.76367e-21	5.49473e-20	3.62416	3.30702	3.19239e-20	5.46813e-19	0.866136	1.29423	0.027653	0.0957367
ENSG00000268575	RP1-283E3.8	ENST00000598846.1	processed_transcript	0.00565677	0.0114372	-1.22715	2.43386	0.00371188	0.0110267	0.26418	3.08889	0.527088	0.988386
ENSG00000227775	RP1-283E3.4	ENST00000417099.1,ENST00000424604.1,ENST00000418950.2,ENST00000577672.1	transcribed_processed_pseudogene,processed_transcript	1.25747e-06	4.01146e-06	3.00256	0.345464	1.16758e-06	6.01652e-06	0.0686547	-1.181	1	1
ENSG00000215790	SLC35E2	ENST00000475229.2,ENST00000355439.6,ENST00000246421.4	processed_transcript,protein_coding	0.0152998	0.0282626	0.493286	3.24476	0.195072	0.339506	0.756938	3.52044	0.00679962	0.0276829
ENSG00000008130	NADK	ENST00000480499.5,ENST00000492768.5,ENST00000480542.1,ENST00000464373.1,ENST00000492845.6,ENST00000497747.5,ENST00000497615.1,ENST00000378625.5,ENST00000342348.9,ENST00000341426.9,ENST00000489538.1,ENST00000477235.5,ENST00000460602.5,ENST00000498806.1,ENST00000497186.5,ENST00000341991.7,ENST00000469045.5	nonsense_mediated_decay,processed_transcript,retained_intron,protein_coding	1.73178e-05	4.90501e-05	-0.807862	5.48084	0.019949	0.0501981	0.596724	6.256	0.00170785	0.00799696
ENSG00000078369	GNB1	ENST00000607589.1,ENST00000437146.1,ENST00000615252.4,ENST00000378609.8,ENST00000472614.2,ENST00000610897.4,ENST00000471354.1,ENST00000439272.6,ENST00000461893.5,ENST00000434686.6	processed_transcript,retained_intron,protein_coding	4.52756e-08	1.65296e-07	-1.67571	8.01807	3.17198e-10	2.43238e-09	-0.212021	8.62678	0.240005	0.57336
ENSG00000169885	CALML6	ENST00000378604.3,ENST00000307786.7,ENST00000482402.1,ENST00000462293.1	processed_transcript,retained_intron,protein_coding	5.31827e-05	0.000142438	6.39234	-1.37038	0.000477779	0.0016722	-5.12548e-15	-3.2253	1	1
ENSG00000178821	TMEM52	ENST00000470931.2,ENST00000310991.7,ENST00000378602.3,ENST00000378598.4,ENST00000602604.1,ENST00000416272.1	nonsense_mediated_decay,retained_intron,protein_coding	8.93861e-56	1.85136e-54	10.1903	2.24862	1.94791e-21	3.5721e-20	3.15006	-2.90365	0.52202	0.980779
ENSG00000142609	CFAP74	ENST00000493964.5,ENST00000378592.1,ENST00000270720.11,ENST00000378590.4,ENST00000464311.5,ENST00000461752.3,ENST00000412120.2,ENST00000493316.5,ENST00000468610.5	retained_intron,protein_coding	1.01764e-16	6.77859e-16	8.09462	0.0511404	8.45518e-10	6.19449e-09	-5.12548e-15	-3.2253	1	1
ENSG00000187730	GABRD	ENST00000639777.1,ENST00000640688.1,ENST00000640981.1,ENST00000640030.1,ENST00000638804.1,ENST00000638771.1,ENST00000639070.1,ENST00000640423.1,ENST00000639045.1,ENST00000638411.1,ENST00000378585.6,ENST00000640317.1,ENST00000639625.1,ENST00000640067.1,ENST00000638604.1,ENST00000640949.1,ENST00000638763.1,ENST00000639935.1,ENST00000640892.1	nonsense_mediated_decay,processed_transcript,retained_intron,protein_coding	6.38833e-12	3.16254e-11	6.98055	-0.941393	1.65649e-05	7.3215e-05	-5.12548e-15	-3.2253	1	1
ENSG00000067606	PRKCZ	ENST00000470986.5,ENST00000400921.6,ENST00000496325.5,ENST00000479263.5,ENST00000378567.7,ENST00000481140.5,ENST00000419838.6,ENST00000503672.1,ENST00000461465.5,ENST00000482686.5,ENST00000484419.1,ENST00000478770.6,ENST00000470596.5,ENST00000505322.5,ENST00000503297.1,ENST00000472017.1,ENST00000471018.6,ENST00000479566.5,ENST00000468310.5,ENST00000470511.5,ENST00000461106.6,ENST00000466352.5,ENS…	nonsense_mediated_decay,processed_transcript,retained_intron,protein_coding	1.99999e-14	1.16215e-13	-0.686666	1.28171	0.420551	0.62681	-4.40988	0.702234	3.10474e-10	3.46053e-09
ENSG00000162585	FAAP20	ENST00000378546.8,ENST00000428120.5,ENST00000497675.2,ENST00000401813.7,ENST00000420964.1,ENST00000414253.5,ENST00000440825.6,ENST00000378543.2,ENST00000469733.5,ENST00000476803.1,ENST00000514625.1,ENST00000420515.1,ENST00000400919.7,ENST00000400918.7,ENST00000487186.5	nonsense_mediated_decay,processed_transcript,retained_intron,protein_coding	0.788224	0.827532	-0.327005	4.60612	0.366987	0.554152	-0.612802	4.586	0.00490197	0.0206263
ENSG00000157933	SKI	ENST00000478223.2,ENST00000507179.1,ENST00000508416.1,ENST00000378536.4	processed_transcript,retained_intron,protein_coding	4.98058e-15	3.00374e-14	2.13544	7.48909	1.2114e-11	1.07561e-10	0.631081	6.51805	0.000276632	0.00150165
ENSG00000116151	MORN1	ENST00000607031.1,ENST00000378525.2,ENST00000449373.2,ENST00000494279.2,ENST00000607342.5,ENST00000419785.1,ENST00000475812.1,ENST00000378531.7,ENST00000606372.5,ENST00000378529.7,ENST00000469374.5	nonsense_mediated_decay,processed_transcript,retained_intron,protein_coding	0.196884	0.268441	0.98899	3.54972	0.00853085	0.0234002	0.0647199	3.13791	0.813537	1
ENSG00000272161	RP4-713A8.1	ENST00000607720.1	sense_intronic	0.0306018	0.0534908	2.96192	-2.62475	1	1	-5.12548e-15	-3.2253	1	1
ENSG00000269896	RP4-740C4.5	ENST00000417061.2,ENST00000602865.1	transcribed_processed_pseudogene,processed_transcript	0.00228188	0.00489576	-1.78005	-0.654697	0.0971104	0.195234	-0.828803	-0.609335	0.222703	0.539475
ENSG00000272420	RP4-740C4.7	ENST00000607858.1	sense_intronic	0.00191429	0.00415164	-5.1217	-1.52537	0.0170619	0.043752	0.0649593	-1.18148	1	1
ENSG00000157916	RER1	ENST00000378518.5,ENST00000378512.5,ENST00000488353.2,ENST00000605895.5,ENST00000306256.13,ENST00000378513.7,ENST00000493207.1,ENST00000462129.1,ENST00000443438.5	retained_intron,protein_coding	0.000111223	0.000285507	-1.0091	6.2262	0.000108343	0.000423679	-0.0862593	6.70263	0.583265	1
ENSG00000157911	PEX10	ENST00000515760.1,ENST00000502666.1,ENST00000288774.7,ENST00000514502.1,ENST00000507596.5,ENST00000447513.6,ENST00000510434.1,ENST00000508384.5	nonsense_mediated_decay,processed_transcript,protein_coding	0.762025	0.817103	-0.0593513	3.92935	0.870608	1	0.268974	4.19955	0.217369	0.528797
ENSG00000149527	PLCH2	ENST00000343889.8,ENST00000278878.6,ENST00000462379.1,ENST00000473964.5,ENST00000378486.7,ENST00000419816.6,ENST00000449969.5,ENST00000609981.5	retained_intron,protein_coding	1.46566e-37	2.05526e-36	6.21552	1.49099	2.03671e-17	2.86356e-16	-1.41787	-2.64013	0.656024	1
ENSG00000157881	PANK4	ENST00000502512.1,ENST00000486396.1,ENST00000505228.5,ENST00000378466.7,ENST00000435556.7,ENST00000491212.1,ENST00000515423.1,ENST00000471361.1,ENST00000514922.1,ENST00000487804.1,ENST00000502770.1,ENST00000468002.2	nonsense_mediated_decay,processed_transcript,retained_intron,protein_coding	0.73213	0.787448	-0.143578	4.64238	0.625319	0.883531	-0.0293129	4.79969	0.885528	1
ENSG00000197921	HES5	ENST00000378453.3	protein_coding	0.0421788	0.0700899	1.69974	-2.08336	0.45766	0.675856	-3.19038	-2.90305	0.52202	0.980779
ENSG00000272449	RP3-395M20.12	ENST00000606645.1	lincRNA	7.29853e-60	1.62982e-58	5.04417	3.78294	5.09715e-27	1.29144e-25	-1.48526	-0.494831	0.0234631	0.0825803
ENSG00000157873	TNFRSF14	ENST00000482074.6,ENST00000426449.5,ENST00000496064.5,ENST00000451778.5,ENST00000463471.6,ENST00000463835.5,ENST00000355716.4,ENST00000475523.5,ENST00000482602.5,ENST00000442392.6,ENST00000471768.1,ENST00000466750.5,ENST00000480305.1,ENST00000435221.6,ENST00000409119.5,ENST00000434817.5	processed_transcript,retained_intron,protein_coding	9.97631e-17	6.64672e-16	-1.48879	2.94874	4.46534e-05	0.000185525	-3.16612	2.70676	4.52482e-07	3.63713e-06
ENSG00000228037	RP3-395M20.9	ENST00000424215.1	lincRNA	0.102602	0.156698	0	-2.80372	1	1	-5.12548e-15	-3.2253	1	1
ENSG00000157870	FAM213B	ENST00000498083.1,ENST00000444521.6,ENST00000477045.1,ENST00000484099.5,ENST00000481683.5,ENST00000474659.5,ENST00000464043.5,ENST00000378427.5,ENST00000537325.5,ENST00000378425.9,ENST00000493183.5,ENST00000419916.6,ENST00000476686.1,ENST00000378424.8,ENST00000465233.5	processed_transcript,retained_intron,protein_coding	1.24977e-14	7.35968e-14	-1.52128	3.4578	1.07453e-05	4.87662e-05	-1.18	3.61222	2.21914e-06	1.64571e-05
ENSG00000142606	MMEL1	ENST00000464195.1,ENST00000511099.1,ENST00000491941.5,ENST00000469962.1,ENST00000378412.7,ENST00000502556.5,ENST00000509374.1,ENST00000504800.5,ENST00000471840.5	nonsense_mediated_decay,processed_transcript,retained_intron,protein_coding	9.17579e-18	6.44339e-17	7.50584	-0.496906	2.03247e-07	1.15093e-06	-5.12548e-15	-3.2253	1	1
ENSG00000215912	TTC34	ENST00000637179.1,ENST00000401095.8	protein_coding	7.02027e-07	2.2914e-06	0.922857	2.05189	0.0248871	0.0606079	-1.55116	1.11985	0.000116763	0.00067516
ENSG00000169717	ACTRT2	ENST00000378404.3	protein_coding	0.60401	0.680069	3.00207	-2.62279	1	1	-5.12548e-15	-3.2253	1	1
ENSG00000177133	LINC00982	ENST00000420957.1	pseudogene	4.62761e-07	1.53566e-06	5.98979	-1.62985	0.00257853	0.00791567	-5.12548e-15	-3.2253	1	1
ENSG00000142611	PRDM16	ENST00000463591.1,ENST00000514189.5,ENST00000270722.9,ENST00000606170.1,ENST00000512462.5,ENST00000509860.1,ENST00000511072.5,ENST00000378391.6,ENST00000378389.5,ENST00000607632.1	processed_transcript,retained_intron,protein_coding	2.81372e-13	1.52016e-12	4.03953	0.0576012	2.24116e-08	1.41524e-07	-4.41404	-2.52412	0.0778999	0.230388
ENSG00000272235	RP11-22L13.1	ENST00000607061.1	lincRNA	0.00128897	0.00287377	5.11779	-2.05747	0.0490569	0.11019	-5.12548e-15	-3.2253	1	1
ENSG00000130762	ARHGEF16	ENST00000464620.1,ENST00000378373.5,ENST00000445297.5,ENST00000378371.6,ENST00000418137.1,ENST00000378378.8,ENST00000485984.1	retained_intron,protein_coding	1.47582e-30	1.70063e-29	0.828089	1.43907	0.0792026	0.163115	-8.29424	0.191826	5.2878e-15	8.42677e-14
ENSG00000272088	RP11-168F9.2	ENST00000606489.1	lincRNA	0.443318	0.545181	-1.93442	-2.63768	1	1	-2.34002	-3.05523	1	1
ENSG00000162591	MEGF6	ENST00000491842.1,ENST00000475790.5,ENST00000485002.6,ENST00000356575.8,ENST00000494257.1,ENST00000461795.1,ENST00000294599.8	nonsense_mediated_decay,retained_intron,protein_coding	1.17738e-33	1.48976e-32	-0.875081	4.68738	0.0434387	0.0989352	-4.5881	4.21219	2.54814e-07	2.11904e-06
ENSG00000158109	TPRG1L	ENST00000344579.5,ENST00000378344.6	protein_coding	0.130101	0.194099	0.212231	4.17512	0.509741	0.743876	0.791603	4.62006	0.000604034	0.00309513
ENSG00000116213	WRAP73	ENST00000497940.5,ENST00000378322.7,ENST00000465916.5,ENST00000270708.11,ENST00000479331.1,ENST00000419924.2,ENST00000469643.1,ENST00000494884.1,ENST00000424367.5,ENST00000471223.1	retained_intron,protein_coding	0.103552	0.157982	-0.813285	4.44377	0.00322831	0.00969372	-0.0770751	4.84702	0.709337	1
ENSG00000078900	TP73	ENST00000604194.1,ENST00000378285.5,ENST00000357733.7,ENST00000378295.8,ENST00000604566.1,ENST00000378290.4,ENST00000603362.5,ENST00000346387.8,ENST00000603364.5,ENST00000378280.5,ENST00000604074.5,ENST00000604479.5,ENST00000378288.8,ENST00000354437.8	retained_intron,protein_coding	2.07535e-32	2.5261e-31	0.581243	0.779408	0.318863	0.488071	-3.66549	-0.220322	2.91426e-05	0.000185179
ENSG00000227372	TP73-AS1	ENST00000624948.1,ENST00000423764.5,ENST00000608600.1,ENST00000418088.5,ENST00000637775.1,ENST00000587071.5,ENST00000419973.1,ENST00000452079.5,ENST00000624167.1,ENST00000636630.1	processed_transcript,transcribed_unitary_pseudogene	2.30121e-153	1.6851e-151	-4.67489	4.25266	5.73331e-30	1.68163e-28	-12.4734	4.25382	1.86516e-81	1.89476e-79
ENSG00000162592	CCDC27	ENST00000636250.1,ENST00000462521.2,ENST00000294600.6	nonsense_mediated_decay,retained_intron,protein_coding	1.19213e-14	7.03324e-14	7.20465	-0.760356	4.5045e-06	2.15591e-05	-5.12548e-15	-3.2253	1	1
ENSG00000235169	SMIM1	ENST00000444870.6,ENST00000452264.1,ENST00000561886.1	protein_coding	0.67186	0.732953	1.04834	-1.06179	0.502579	0.734227	-0.364523	-1.52498	0.911584	1
ENSG00000130764	LRRC47	ENST00000479239.1,ENST00000378251.2,ENST00000462356.5	nonsense_mediated_decay,retained_intron,protein_coding	0.751502	0.806576	-0.375588	6.28901	0.213747	0.368629	0.00505244	6.57059	0.977083	1
ENSG00000116198	CEP104	ENST00000378223.3,ENST00000494653.5,ENST00000495701.1,ENST00000484420.1,ENST00000461667.1,ENST00000438539.5,ENST00000460038.5,ENST00000378230.7,ENST00000428079.5,ENST00000443466.1,ENST00000494951.1	processed_transcript,retained_intron,protein_coding	0.437188	0.53872	0.589754	5.23252	0.034501	0.0816592	0.128427	5.08312	0.501901	0.980779
ENSG00000169598	DFFB	ENST00000491998.5,ENST00000625756.2,ENST00000341385.4,ENST00000339350.7,ENST00000468793.5,ENST00000378209.7,ENST00000477548.5,ENST00000338895.7,ENST00000481945.1,ENST00000378206.5,ENST00000475969.5,ENST00000461150.1	nonsense_mediated_decay,retained_intron,protein_coding	0.0426529	0.0708336	-0.377124	4.11341	0.206187	0.356841	0.258272	4.51864	0.176596	0.445037
ENSG00000198912	C1orf174	ENST00000474140.1,ENST00000361605.3,ENST00000486765.5	processed_transcript,retained_intron,protein_coding	3.14979e-09	1.27008e-08	-1.78325	4.65369	1.91317e-10	1.50616e-09	-0.284502	5.2313	0.209786	0.513434
ENSG00000236423	LINC01134	ENST00000442673.1,ENST00000413332.5,ENST00000439488.1	lincRNA	6.16763e-10	2.64244e-09	3.19531	1.7431	2.95283e-12	2.77322e-11	0.273334	-0.07643	0.66574	1
ENSG00000233304	LINC01346	ENST00000412674.1,ENST00000635619.1,ENST00000456897.5	lincRNA	0.017573	0.0320857	4.8965	-2.17547	0.0791691	0.163057	-5.12548e-15	-3.2253	1	1
ENSG00000226374	LINC01345	ENST00000635127.1,ENST00000425194.1,ENST00000635247.1	lincRNA	0.770289	0.817364	0	-2.80372	1	1	-5.12548e-15	-3.2253	1	1
ENSG00000235054	LINC01777	ENST00000635002.1,ENST00000635312.1,ENST00000635642.1,ENST00000633821.1,ENST00000423197.2	lincRNA	0.61423	0.680069	2.96192	-2.62475	1	1	-5.12548e-15	-3.2253	1	1
ENSG00000232596	LINC01646	ENST00000420522.1,ENST00000635556.1,ENST00000634256.1	lincRNA	0.0347345	0.0594896	4.45737	-2.31361	0.190109	0.331684	-5.12548e-15	-3.2253	1	1
ENSG00000196581	AJAP1	ENST00000378191.4,ENST00000466761.1,ENST00000378190.7	processed_transcript,protein_coding	0.0076583	0.0150016	4.86874	-2.17746	0.0791691	0.163057	-5.12548e-15	-3.2253	1	1
ENSG00000260972	RP1-58B11.1	ENST00000564261.1	lincRNA	0.00669673	0.0132946	4.86874	-2.17746	0.0791691	0.163057	-5.12548e-15	-3.2253	1	1
ENSG00000131697	NPHP4	ENST00000460696.1,ENST00000470763.1,ENST00000478423.6,ENST00000468253.1,ENST00000489180.6,ENST00000466897.1,ENST00000378156.8,ENST00000378169.7,ENST00000622020.4,ENST00000378161.5,ENST00000506941.1	nonsense_mediated_decay,processed_transcript,retained_intron,protein_coding	1.32968e-05	3.81989e-05	1.58466	5.41927	1.13223e-06	5.84754e-06	0.602877	4.87231	0.00220422	0.0100406
ENSG00000069424	KCNAB2	ENST00000493807.1,ENST00000428161.5,ENST00000378111.5,ENST00000378083.7,ENST00000481789.1,ENST00000352527.5,ENST00000378092.5,ENST00000478098.5,ENST00000445501.5,ENST00000602612.5,ENST00000341524.5,ENST00000472700.6,ENST00000389632.8,ENST00000435937.5,ENST00000459822.1,ENST00000378097.5,ENST00000462676.2,ENST00000164247.5,ENST00000458166.6	processed_transcript,retained_intron,protein_coding	6.93328e-23	6.12886e-22	-1.05594	7.52216	0.000271147	0.000995491	1.44408	8.95548	4.39843e-15	7.03748e-14
ENSG00000116254	CHD5	ENST00000496404.1,ENST00000462991.5,ENST00000475121.1,ENST00000377999.5,ENST00000262450.7,ENST00000491020.1	nonsense_mediated_decay,protein_coding	5.73854e-20	4.47123e-19	2.77909	3.87289	1.53123e-18	2.33887e-17	-2.06594	1.39726	3.32336e-08	3.0507e-07
ENSG00000116251	RPL22	ENST00000465335.1,ENST00000465387.5,ENST00000471204.5,ENST00000234875.8,ENST00000480661.1,ENST00000497965.5,ENST00000484532.5,ENST00000462296.5	retained_intron,protein_coding	0.107872	0.163923	0.179216	7.96482	0.651337	0.915402	0.850468	8.46473	8.66601e-05	0.000511458
ENSG00000158286	RNF207	ENST00000496329.1,ENST00000496676.5,ENST00000485539.5,ENST00000463453.1,ENST00000492476.1,ENST00000466994.5,ENST00000483336.1,ENST00000484435.1,ENST00000377939.4	processed_transcript,retained_intron,protein_coding	5.6071e-19	4.17504e-18	0.770218	2.75414	0.0351115	0.0829692	2.20545	3.92837	1.03713e-21	2.38936e-20
ENSG00000116237	ICMT	ENST00000489498.5,ENST00000495791.1,ENST00000343813.9,ENST00000474756.1	nonsense_mediated_decay,processed_transcript,protein_coding	5.10975e-28	5.39822e-27	-3.02101	5.89083	1.08391e-24	2.41203e-23	0.28024	6.96141	0.0922495	0.26604
ENSG00000225077	LINC00337	ENST00000429480.2,ENST00000441724.1	lincRNA	1.32833e-05	3.81634e-05	5.01457	-0.900061	2.22718e-05	9.6467e-05	-0.0367736	-2.90344	1	1
ENSG00000173673	HES3	ENST00000377898.3	protein_coding	0.00243886	0.00521228	5.14276	-2.05548	0.0365982	0.0853851	-5.12548e-15	-3.2253	1	1
ENSG00000158292	GPR153	ENST00000377893.2	protein_coding	1.3028e-36	1.78925e-35	6.01623	1.26184	3.24559e-10	2.48645e-09	5.89904	1.48191	6.95057e-15	1.09891e-13
ENSG00000097021	ACOT7	ENST00000418124.5,ENST00000377860.8,ENST00000377845.7,ENST00000608083.5,ENST00000377842.7,ENST00000377855.6,ENST00000481175.1,ENST00000545482.5,ENST00000361521.8,ENST00000473466.2	nonsense_mediated_decay,retained_intron,protein_coding	0.193832	0.26464	-0.289137	5.81354	0.332892	0.507457	-0.661382	5.76073	0.078286	0.231166
ENSG00000069812	HES2	ENST00000489730.1,ENST00000471190.1,ENST00000377837.5,ENST00000377834.8,ENST00000377836.8,ENST00000487437.5	processed_transcript,protein_coding	2.51998e-13	1.36654e-12	7.35249	-0.645689	7.17373e-06	3.34417e-05	-5.12548e-15	-3.2253	1	1
ENSG00000187017	ESPN	ENST00000461727.5,ENST00000636330.1,ENST00000434576.1,ENST00000632142.1,ENST00000475479.2,ENST00000632593.1,ENST00000633651.1,ENST00000478323.1,ENST00000416731.5,ENST00000477679.1,ENST00000636644.1,ENST00000475228.5,ENST00000633239.1,ENST00000632803.1,ENST00000468561.1,ENST00000418286.1,ENST00000377828.5	processed_transcript,retained_intron,protein_coding	2.07669e-24	1.94254e-23	4.48557	1.42898	2.6769e-09	1.86828e-08	-5.37982	-2.05395	0.00410998	0.0176276
ENSG00000215788	TNFRSF25	ENST00000414040.6,ENST00000377782.7,ENST00000351748.7,ENST00000453260.6,ENST00000351959.9,ENST00000515145.1,ENST00000485036.5,ENST00000502588.5,ENST00000461703.6,ENST00000453341.1,ENST00000480393.5,ENST00000475730.5,ENST00000513135.5,ENST00000510563.5,ENST00000481401.5,ENST00000356876.7,ENST00000348333.7,ENST00000473343.5,ENST00000502730.5,ENST00000469691.5	nonsense_mediated_decay,processed_transcript,retained_intron,protein_coding	5.47468e-155	4.12211e-153	-4.68226	4.36119	1.89592e-37	8.18751e-36	-12.5862	4.36627	1.75461e-102	2.62372e-100
ENSG00000171680	PLEKHG5	ENST00000377732.5,ENST00000377748.5,ENST00000535355.5,ENST00000639593.1,ENST00000377728.7,ENST00000537245.5,ENST00000377725.5,ENST00000487949.4,ENST00000489097.5,ENST00000340850.9,ENST00000400915.7,ENST00000377740.4,ENST00000400913.5	retained_intron,protein_coding	2.47347e-19	1.87119e-18	0.962424	1.40363	0.0246845	0.0601647	-5.02755	0.121617	5.46531e-12	7.00681e-11
ENSG00000162408	NOL9	ENST00000377705.5,ENST00000464383.1,ENST00000462798.1,ENST00000460777.1,ENST00000464665.1	retained_intron,protein_coding	1.83487e-07	6.30743e-07	-1.7152	6.54279	1.41487e-10	1.12879e-09	-0.128192	7.19658	0.484965	0.97291
ENSG00000229519	RP11-58A11.2	ENST00000456162.2	processed_pseudogene	0.770289	0.817364	0	-2.80372	1	1	-5.12548e-15	-3.2253	1	1
ENSG00000173662	TAS1R1	ENST00000351136.7,ENST00000411823.5,ENST00000333172.10,ENST00000415267.1	protein_coding	9.6799e-05	0.000250978	4.35508	-1.38054	0.00116647	0.0038284	-2.34002	-3.05523	1	1
ENSG00000204859	ZBTB48	ENST00000319084.9,ENST00000498342.5,ENST00000435905.5,ENST00000488936.1,ENST00000466813.1,ENST00000466941.1,ENST00000482360.5,ENST00000377674.8	nonsense_mediated_decay,retained_intron,protein_coding	3.01866e-08	1.11932e-07	1.53952	5.95669	1.83044e-06	9.21554e-06	0.798087	5.55956	3.73107e-06	2.68785e-05
ENSG00000162413	KLHL21	ENST00000463043.1,ENST00000496707.5,ENST00000610898.1,ENST00000377658.8,ENST00000377663.3,ENST00000467612.5	protein_coding	1.52748e-50	2.88885e-49	3.6337	8.63275	1.04467e-27	2.73562e-26	0.426343	6.2263	0.03327	0.112138
ENSG00000116273	PHF13	ENST00000377648.4,ENST00000495385.1	processed_transcript,protein_coding	3.62253e-14	2.07186e-13	-2.08707	4.82645	1.22754e-13	1.29299e-12	-0.0219137	5.59142	0.908269	1
ENSG00000041988	THAP3	ENST00000480647.1,ENST00000484669.6,ENST00000054650.8,ENST00000487819.5,ENST00000377627.7,ENST00000484676.1,ENST00000307896.10,ENST00000472925.1	nonsense_mediated_decay,processed_transcript,retained_intron,protein_coding	0.130685	0.194868	-0.256487	3.64917	0.395523	0.593155	0.178099	3.95749	0.431623	0.885554
ENSG00000007923	DNAJC11	ENST00000485073.5,ENST00000473993.5,ENST00000451196.5,ENST00000465508.5,ENST00000460594.5,ENST00000377577.9,ENST00000294401.11,ENST00000469318.5,ENST00000465911.1,ENST00000426784.1,ENST00000472414.1	processed_transcript,protein_coding	0.109587	0.166277	-0.0457322	6.35106	0.862336	1	0.318756	6.6471	0.160496	0.412006
ENSG00000228750	LINC01672	ENST00000635092.1,ENST00000414210.5,ENST00000421469.2,ENST00000432429.5,ENST00000635029.1	lincRNA	0.162211	0.233357	0	-2.80372	1	1	-5.12548e-15	-3.2253	1	1
ENSG00000171735	CAMTA1	ENST00000472283.1,ENST00000495233.5,ENST00000486138.1,ENST00000473578.5,ENST00000490738.5,ENST00000461580.5,ENST00000482934.1,ENST00000303635.11,ENST00000557126.5,ENST00000490905.5,ENST00000476163.5,ENST00000470648.5,ENST00000467404.6,ENST00000476864.1,ENST00000461311.1,ENST00000467267.1	nonsense_mediated_decay,processed_transcript,protein_coding	0.914594	0.92052	-0.292859	4.06278	0.391236	0.587166	-0.0782023	4.25859	0.765177	1
ENSG00000270171	RP11-338N10.1	ENST00000602640.1	lincRNA	0.770289	0.817364	0	-2.80372	1	1	-5.12548e-15	-3.2253	1	1
ENSG00000270035	RP11-338N10.2	ENST00000602973.1	lincRNA	0.167214	0.238398	3.88882	-2.46187	0.312854	0.479929	-5.12548e-15	-3.2253	1	1
ENSG00000269978	RP11-338N10.3	ENST00000602916.1	lincRNA	0.654632	0.717848	0	-2.80372	1	1	-5.12548e-15	-3.2253	1	1
ENSG00000049245	VAMP3	ENST00000487194.1,ENST00000470357.1,ENST00000054666.10	retained_intron,protein_coding	7.65811e-05	0.000201298	-1.01551	4.80465	0.00021465	0.000800707	0.285043	5.46527	0.111814	0.310945
ENSG00000269925	RP3-467L1.6	ENST00000602406.1	sense_intronic	0.0920064	0.141876	-0.78556	-0.0694333	0.276267	0.464281	1.12688	0.814824	0.00991825	0.0386724
ENSG00000049246	PER3	ENST00000602883.1,ENST00000377532.7,ENST00000613533.4,ENST00000463106.1,ENST00000494684.1,ENST00000473653.1,ENST00000361923.2,ENST00000614998.4,ENST00000377541.5	retained_intron,protein_coding	5.44811e-41	8.39381e-40	-1.68101	5.09231	1.95567e-09	1.38669e-08	-2.97126	4.96234	1.77543e-49	9.96734e-48
ENSG00000049247	UTS2	ENST00000054668.5,ENST00000361696.9,ENST00000377516.6	protein_coding	3.95432e-08	1.45296e-07	-6.1019	-0.881914	0.00230489	0.00715042	-6.62231	-1.22222	2.81665e-06	2.05783e-05
ENSG00000049249	TNFRSF9	ENST00000492571.1,ENST00000377507.7,ENST00000615230.4,ENST00000474475.1	nonsense_mediated_decay,protein_coding	9.08569e-160	7.23239e-158	8.18905	4.92283	2.81336e-46	1.87168e-44	-5.06644	-2.22416	0.0117767	0.0451321
ENSG00000270330	RP5-892F13.2	ENST00000603760.1	processed_pseudogene	2.78597e-08	1.03556e-07	4.63101	-1.16497	0.000688689	0.00234922	-2.34002	-3.05523	1	1
ENSG00000116288	PARK7	ENST00000460192.5,ENST00000469225.1,ENST00000377491.5,ENST00000377488.5,ENST00000338639.9,ENST00000497113.1,ENST00000377493.9,ENST00000493373.5,ENST00000493678.5,ENST00000465354.5	processed_transcript,retained_intron,protein_coding	0.118551	0.1786	-0.320542	6.55263	0.214004	0.369052	0.152733	6.88661	0.608385	1
ENSG00000116285	ERRFI1	ENST00000377482.9,ENST00000474874.5,ENST00000487559.1,ENST00000469499.5,ENST00000467067.1	nonsense_mediated_decay,protein_coding	2.17158e-237	5.03556e-235	11.8447	5.96065	3.92696e-89	2.85597e-86	6.92401	1.12921	1.57358e-20	3.42083e-19
ENSG00000238290	RP11-431K24.1	ENST00000445300.1	lincRNA	1.37752e-12	7.12933e-12	7.13078	-0.819371	4.76032e-06	2.27291e-05	-5.12548e-15	-3.2253	1	1
ENSG00000232848	CTA-215D11.4	ENST00000399343.2	processed_pseudogene	0.501388	0.599008	2.96192	-2.62475	1	1	-5.12548e-15	-3.2253	1	1
ENSG00000229305	RP11-431K24.2	ENST00000453364.1	processed_pseudogene	0.60401	0.680069	3.00207	-2.62279	1	1	-5.12548e-15	-3.2253	1	1
ENSG00000227634	LINC01714	ENST00000635451.1,ENST00000452982.1	lincRNA	0.61423	0.680069	2.96192	-2.62475	1	1	-5.12548e-15	-3.2253	1	1
ENSG00000233645	RP11-431K24.4	ENST00000424689.1	lincRNA	0.00620255	0.0124206	4.8965	-2.17547	0.0791691	0.163057	-5.12548e-15	-3.2253	1	1
ENSG00000162426	SLC45A1	ENST00000481265.1,ENST00000471889.5,ENST00000289877.8,ENST00000497660.5	processed_transcript,retained_intron,protein_coding	7.18717e-06	2.12894e-05	6.37051	-1.37444	0.000536475	0.00186054	4.36474	-2.52587	0.184445	0.461004
ENSG00000142599	RERE	ENST00000507012.1,ENST00000476556.5,ENST00000514428.1,ENST00000488215.5,ENST00000337907.7,ENST00000505225.1,ENST00000400908.6,ENST00000480342.5,ENST00000492766.5,ENST00000464972.5,ENST00000467350.1,ENST00000465125.1,ENST00000469251.1,ENST00000460659.5,ENST00000468247.1,ENST00000400907.6,ENST00000377464.5	processed_transcript,retained_intron,protein_coding	0.00632539	0.0126492	0.619906	6.88087	0.0195867	0.0493718	-0.207747	6.54644	0.193456	0.479816
ENSG00000224315	RPL7P7	ENST00000428803.2	processed_pseudogene	0.441198	0.543013	-1.35503	-0.938076	0.256631	0.434577	-0.585453	-0.90297	0.534037	0.99855
ENSG00000228423	RP4-633I8.4	ENST00000433876.2	lincRNA	0.13763	0.204199	-4.16408	-2.01914	0.170451	0.31734	1.57424	-1.18323	0.161971	0.414977
ENSG00000229716	RPL23AP19	ENST00000436229.2	processed_pseudogene	0.779382	0.81884	0	-2.80372	1	1	-5.12548e-15	-3.2253	1	1
ENSG00000074800	ENO1	ENST00000486051.5,ENST00000464920.1,ENST00000489867.1,ENST00000497492.1,ENST00000234590.8,ENST00000492343.1	retained_intron,protein_coding	1.10287e-10	4.99107e-10	-1.59133	9.9873	1.49637e-08	9.64428e-08	0.362749	10.8737	0.181353	0.455269
ENSG00000236269	ENO1-IT1	ENST00000414948.1	sense_intronic	1.21918e-35	1.63101e-34	3.01448	4.48559	3.30522e-20	5.65297e-19	0.895009	2.97174	0.00176438	0.00825077
ENSG00000238249	HMGN2P17	ENST00000425872.1	processed_pseudogene	0.925905	0.931289	-0.654805	-2.10991	1	1	-0.956928	-2.41754	0.728163	1
ENSG00000232208	RP3-477M7.5	ENST00000424862.2	processed_pseudogene	0.450722	0.552568	0	-2.80372	1	1	2.30487	-3.05545	1	1
ENSG00000131686	CA6	ENST00000549778.5,ENST00000377443.6,ENST00000480186.7,ENST00000377442.3,ENST00000476083.1,ENST00000377436.6	processed_transcript,protein_coding	0.0958019	0.147232	2.96192	-2.62475	1	1	-5.12548e-15	-3.2253	1	1
ENSG00000197241	SLC2A7	ENST00000400906.1	protein_coding	2.25835e-08	8.45034e-08	3.27031	-1.11245	0.000759466	0.00257038	-3.72154	-2.76541	0.283029	0.635084
ENSG00000142583	SLC2A5	ENST00000473209.1,ENST00000377424.8,ENST00000377414.7,ENST00000479813.5,ENST00000486632.5,ENST00000487492.1,ENST00000487835.5,ENST00000484798.5,ENST00000474145.5,ENST00000464985.5	retained_intron,protein_coding	2.82961e-17	1.94142e-16	-0.114969	2.20525	0.850253	1	2.16772	3.79354	3.21234e-05	0.000202791
ENSG00000180758	GPR157	ENST00000465853.1,ENST00000377411.4,ENST00000466131.1	retained_intron,protein_coding	6.61274e-08	2.37655e-07	2.54064	2.02556	3.50124e-09	2.41621e-08	0.213183	0.65564	0.759085	1
ENSG00000228526	MIR34AHG	ENST00000437157.3,ENST00000635405.1,ENST00000635687.1	lincRNA	0.19526	0.266396	2.96192	-2.62475	1	1	-5.12548e-15	-3.2253	1	1
ENSG00000234546	LINC01759	ENST00000635271.1,ENST00000412639.2,ENST00000634966.1	lincRNA	0.174239	0.241276	3.8541	-2.46383	0.312854	0.479929	-5.12548e-15	-3.2253	1	1
ENSG00000281937	RP3-510D11.4	ENST00000632503.1	lincRNA	0.263042	0.347437	2.96192	-2.62475	1	1	-5.12548e-15	-3.2253	1	1
ENSG00000049239	H6PD	ENST00000495451.1,ENST00000602477.1,ENST00000377403.6	processed_transcript,protein_coding	0.105878	0.161169	-0.14259	4.68107	0.672801	0.942069	-0.470839	4.63706	0.403532	0.843416
ENSG00000171621	SPSB1	ENST00000450402.1,ENST00000377399.2,ENST00000328089.10,ENST00000357898.3	protein_coding	1.42046e-45	2.42813e-44	4.5742	3.36343	1.25683e-26	3.11773e-25	-3.97128	-0.762161	3.43434e-05	0.000216294
ENSG00000171612	SLC25A33	ENST00000302692.6	protein_coding	0.0109999	0.0207875	0.969014	5.33952	0.00138779	0.00447766	0.546479	5.18843	0.0181208	0.0659914
ENSG00000231181	RP13-15M17.1	ENST00000435277.1	processed_pseudogene	0.000224463	0.000556162	-3.32577	0.477101	4.11134e-05	0.000171574	0.259143	1.24892	0.582917	1
ENSG00000188807	TMEM201	ENST00000508400.1,ENST00000416541.5,ENST00000340305.9,ENST00000510900.1,ENST00000340381.10	nonsense_mediated_decay,processed_transcript,protein_coding	0.00133969	0.00297276	-0.971875	5.46293	0.00454248	0.0132821	0.189704	6.06264	0.373916	0.794879
ENSG00000171608	PIK3CD	ENST00000628140.2,ENST00000536656.5,ENST00000361110.6,ENST00000484851.1,ENST00000543390.2,ENST00000481137.1,ENST00000377346.8,ENST00000479223.1	processed_transcript,retained_intron,protein_coding	3.83026e-17	2.61229e-16	-2.52653	6.63483	5.16984e-13	5.1893e-12	0.586194	7.82359	0.000674835	0.00342122
ENSG00000171603	CLSTN1	ENST00000464286.1,ENST00000477264.1,ENST00000435891.5,ENST00000377298.8,ENST00000361311.4	processed_transcript,protein_coding	2.66975e-06	8.24155e-06	-0.718978	6.46601	0.0063096	0.0177673	0.544142	7.18095	0.00221142	0.0100691
ENSG00000178585	CTNNBIP1	ENST00000377258.5,ENST00000400904.7,ENST00000377263.5,ENST00000377256.1	protein_coding	8.31378e-10	3.52839e-09	-1.96874	3.87456	3.61584e-09	2.49315e-08	-0.760768	4.27642	0.000655046	0.00333145
ENSG00000162441	LZIC	ENST00000471853.1,ENST00000377213.1,ENST00000377223.5,ENST00000400903.6,ENST00000488540.5	retained_intron,protein_coding	8.23984e-05	0.000215773	-1.45689	4.62048	6.78146e-06	3.17772e-05	-0.0603994	5.22698	0.729754	1
ENSG00000228150	RP11-84A14.4	ENST00000445884.1	sense_intronic	0.862109	0.871092	1.25937	-0.567488	0.234601	0.401156	0.658879	-0.735085	0.523926	0.983552
ENSG00000173614	NMNAT1	ENST00000403197.5,ENST00000496751.1,ENST00000377205.5,ENST00000462686.1,ENST00000492735.1	nonsense_mediated_decay,processed_transcript,protein_coding	0.0814132	0.127159	-0.284046	3.68498	0.324096	0.495016	-0.0559323	3.886	0.796971	1
ENSG00000162444	RBP7	ENST00000294435.7,ENST00000315901.4	nonsense_mediated_decay,protein_coding	0.000101435	0.000262105	5.91399	-1.63792	0.0151344	0.0392177	3.6819	-2.7661	0.283029	0.635084
ENSG00000130939	UBE4B	ENST00000253251.12,ENST00000470736.1,ENST00000377153.5,ENST00000466379.1,ENST00000487244.5,ENST00000488228.1,ENST00000343090.10,ENST00000465408.1,ENST00000462658.1,ENST00000475795.5	nonsense_mediated_decay,processed_transcript,retained_intron,protein_coding	0.088049	0.136325	-0.480183	6.39245	0.0706837	0.151722	-0.00142011	6.71559	0.995007	1
ENSG00000224340	RP11-496H15.2	ENST00000456484.1	processed_pseudogene	0.770289	0.817364	0	-2.80372	1	1	-5.12548e-15	-3.2253	1	1
ENSG00000233623	PGAM1P11	ENST00000416729.2	processed_pseudogene	0.00626864	0.0125428	0.0591348	-1.63338	1	1	1.20702	-1.22634	0.102393	0.288736
ENSG00000054523	KIF1B	ENST00000377083.5,ENST00000377081.5,ENST00000497835.1,ENST00000495136.1,ENST00000263934.10,ENST00000620295.2,ENST00000622724.3,ENST00000483340.1,ENST00000465635.5,ENST00000470616.1,ENST00000377086.5,ENST00000635499.1,ENST00000377093.8	processed_transcript,retained_intron,protein_coding	4.73082e-16	3.02531e-15	2.11687	6.37902	2.79326e-10	2.15904e-09	0.173887	5.16744	0.367907	0.78373
ENSG00000142657	PGD	ENST00000493288.1,ENST00000270776.12,ENST00000491493.5,ENST00000483936.5,ENST00000487775.1,ENST00000465632.5,ENST00000477958.5,ENST00000498356.1,ENST00000496718.1,ENST00000460189.1	nonsense_mediated_decay,processed_transcript,retained_intron,protein_coding	3.68722e-09	1.47821e-08	-0.347741	7.58832	0.180067	0.331684	-0.101227	7.80721	0.580724	1
ENSG00000251503	APITD1-CORT	ENST00000602296.6,ENST00000465026.1,ENST00000470413.6,ENST00000400900.6,ENST00000602787.6	protein_coding	0.171939	0.241276	4.39582	-2.31757	0.190109	0.331684	-5.12548e-15	-3.2253	1	1
ENSG00000175279	CENPS	ENST00000309048.7,ENST00000602486.1,ENST00000462462.1,ENST00000477755.1,ENST00000464507.1	nonsense_mediated_decay,processed_transcript,retained_intron,protein_coding	8.05878e-07	2.61728e-06	-4.40019	0.907777	6.69883e-09	4.48176e-08	-0.0972724	1.59559	0.773457	1
ENSG00000241563	CORT	ENST00000377049.3	protein_coding	0.0387205	0.0654789	0.00506516	-0.942206	1	1	-1.11643	-1.3173	0.183978	0.460669
ENSG00000160049	DFFA	ENST00000377036.2,ENST00000476658.5,ENST00000377038.7	nonsense_mediated_decay,protein_coding	1.29661e-14	7.62573e-14	-1.98097	6.13347	1.06303e-12	1.03616e-11	-0.0201709	6.89429	0.897894	1
ENSG00000142655	PEX14	ENST00000492696.1,ENST00000356607.8,ENST00000491661.2,ENST00000472851.1	processed_transcript,retained_intron,protein_coding	0.165847	0.237752	-0.835024	4.7194	0.0022336	0.00694204	-0.50374	4.93958	0.00562256	0.0233604
ENSG00000130940	CASZ1	ENST00000344008.5,ENST00000490176.1,ENST00000377022.7,ENST00000478728.2,ENST00000496432.6,ENST00000478524.1,ENST00000492173.1,ENST00000447850.3,ENST00000472814.1	processed_transcript,retained_intron,protein_coding	2.31796e-12	1.18301e-11	0.82248	2.5156	0.0383906	0.0890087	-2.53782	1.43416	5.26124e-05	0.00032259
ENSG00000175262	C1orf127	ENST00000418570.6,ENST00000468348.1,ENST00000476357.1,ENST00000520253.1,ENST00000377004.8	retained_intron,protein_coding	1.23052e-10	5.54209e-10	0.87451	-0.511974	0.246499	0.419349	0.187113	-0.733627	0.776466	1
ENSG00000215785	CFL1P6	ENST00000400899.2	processed_pseudogene	0.0123707	0.0231932	0	-2.80372	1	1	-5.12548e-15	-3.2253	1	1
ENSG00000120948	TARDBP	ENST00000496840.1,ENST00000618606.1,ENST00000477447.6,ENST00000614494.1,ENST00000611963.4,ENST00000439080.6,ENST00000315091.7,ENST00000622057.4,ENST00000638264.1,ENST00000639599.1,ENST00000621573.1,ENST00000620505.1,ENST00000621715.4,ENST00000473869.5,ENST00000613864.4,ENST00000610369.4,ENST00000619555.4,ENST00000620632.4,ENST00000473118.5,ENST00000472476.5,ENST00000621790.4,ENST00000476201.5,ENS…	nonsense_mediated_decay,processed_transcript,retained_intron,protein_coding	2.79582e-11	1.32562e-10	-2.19126	6.12317	7.98957e-10	5.87199e-09	0.201487	7.03731	0.272511	0.635084
ENSG00000277726	RP4-635E18.9	ENST00000622108.1,ENST00000612542.1,ENST00000611136.4,ENST00000614757.4,ENST00000620028.1	nonsense_mediated_decay,processed_transcript,protein_coding	1.18777e-09	4.96257e-09	-4.28559	1.28868	3.08982e-10	2.37222e-09	-0.479596	1.84802	0.179236	0.450695
ENSG00000009724	MASP2	ENST00000480221.1,ENST00000400897.7,ENST00000400898.3,ENST00000478645.1	retained_intron,protein_coding	2.03086e-13	1.1073e-12	2.11176	0.22671	0.000540008	0.00187117	-6.21253	-1.52239	0.000223844	0.00123203
ENSG00000116649	SRM	ENST00000475189.1,ENST00000490101.1,ENST00000487300.1,ENST00000459997.1,ENST00000465788.1,ENST00000376957.6	nonsense_mediated_decay,retained_intron,protein_coding	2.29488e-05	6.41307e-05	0.571641	7.06773	0.034547	0.0817447	0.550838	7.16323	0.134509	0.363936
ENSG00000171824	EXOSC10	ENST00000478271.1,ENST00000469634.5,ENST00000485606.1,ENST00000376936.8,ENST00000460196.1,ENST00000490565.1,ENST00000498576.1,ENST00000470611.5,ENST00000304457.11,ENST00000472078.1,ENST00000474216.5	nonsense_mediated_decay,processed_transcript,retained_intron,protein_coding	0.317773	0.411357	0.544619	7.18125	0.0756718	0.16124	-0.00721747	6.98735	0.967201	1
ENSG00000198793	MTOR	ENST00000476768.1,ENST00000361445.8,ENST00000495435.1,ENST00000473471.5,ENST00000376838.5,ENST00000490931.1,ENST00000455339.1	processed_transcript,protein_coding	0.61909	0.684835	0.101673	7.60207	0.701112	0.966177	-0.0901081	7.61224	0.610019	1
ENSG00000171819	ANGPTL7	ENST00000376819.3,ENST00000476934.1	processed_transcript,protein_coding	0.174239	0.241276	3.8541	-2.46383	0.312854	0.479929	-5.12548e-15	-3.2253	1	1
ENSG00000120942	UBIAD1	ENST00000483738.1,ENST00000376804.2,ENST00000376810.5,ENST00000486588.6	nonsense_mediated_decay,protein_coding	0.00385155	0.0079866	-0.900728	5.60528	0.00197227	0.00622105	-0.258771	5.96045	0.175678	0.443316
ENSG00000238199	UBE2V2P3	ENST00000433562.1	processed_pseudogene	0.262946	0.347381	-2.73032	-2.48981	1	1	-3.19015	-2.90307	0.52202	0.980779
ENSG00000204624	DISP3	ENST00000423056.2,ENST00000294484.6,ENST00000304391.6	processed_transcript,protein_coding	8.4907e-148	5.85566e-146	8.60012	5.65025	2.15503e-72	5.4731e-70	1.30868	-0.768428	0.118379	0.326224
ENSG00000235643	LINC01647	ENST00000453135.1	lincRNA	1.89762e-18	1.37167e-17	8.02804	0.0255616	1.85842e-07	1.05874e-06	-5.12548e-15	-3.2253	1	1
ENSG00000116661	FBXO2	ENST00000471501.1,ENST00000475961.1,ENST00000466919.1,ENST00000354287.4,ENST00000465901.1	processed_transcript,retained_intron,protein_coding	6.74311e-05	0.00017836	2.27224	-1.01302	0.0397804	0.0913573	-4.66522	-2.41711	0.0697061	0.210871
ENSG00000132879	FBXO44	ENST00000471895.1,ENST00000475435.5,ENST00000376768.5,ENST00000425796.5,ENST00000251547.9,ENST00000376760.5,ENST00000376770.5,ENST00000376762.8,ENST00000251546.8	protein_coding	0.0165696	0.0303925	-0.980227	2.04966	0.0511887	0.114508	-0.0744535	2.44715	0.831067	1
ENSG00000116663	FBXO6	ENST00000449067.1,ENST00000474239.1,ENST00000376753.8	retained_intron,protein_coding	4.54139e-29	4.97005e-28	-2.73257	2.47743	1.37426e-09	9.88454e-09	-3.66864	2.3735	2.70768e-25	7.3741e-24
ENSG00000116670	MAD2L2	ENST00000376692.8,ENST00000376669.9,ENST00000376664.10,ENST00000376667.7,ENST00000445656.5,ENST00000235310.7,ENST00000456915.1,ENST00000376655.1,ENST00000376672.5	retained_intron,protein_coding	0.0381661	0.0646506	-0.711601	5.1154	0.064819	0.140443	-0.251057	5.40454	0.322331	0.704117
ENSG00000162490	DRAXIN	ENST00000294485.5	protein_coding	0.00341933	0.0071464	1.11821	-0.0455637	0.197619	0.34363	-2.19238	-1.05334	0.0503677	0.160025
ENSG00000177674	AGTRAP	ENST00000314340.9,ENST00000494437.1,ENST00000376629.8,ENST00000376637.7,ENST00000513739.5,ENST00000452018.6,ENST00000476309.5,ENST00000471765.1,ENST00000400895.6,ENST00000376627.6,ENST00000510878.1,ENST00000476512.5,ENST00000514733.5,ENST00000491346.5	nonsense_mediated_decay,processed_transcript,retained_intron,protein_coding	1.42706e-43	2.33109e-42	-0.176307	0.689495	0.803015	1	2.83557	2.78361	2.88966e-20	6.22269e-19
ENSG00000215910	C1orf167	ENST00000475041.1,ENST00000433342.5,ENST00000444493.5,ENST00000449278.1,ENST00000312793.9,ENST00000484153.1,ENST00000482358.1	processed_transcript,retained_intron,protein_coding	5.55102e-05	0.000148336	6.12086	-1.54162	0.00139769	0.00450188	2.30487	-3.05545	1	1
ENSG00000177000	MTHFR	ENST00000376590.7,ENST00000423400.5,ENST00000376592.5,ENST00000413656.5,ENST00000376583.7,ENST00000418034.1,ENST00000431243.5,ENST00000376486.2,ENST00000376585.5	protein_coding	3.67099e-07	1.22969e-06	1.39578	6.62759	4.98726e-06	2.37701e-05	-0.39131	5.69668	0.0196742	0.0710099
ENSG00000011021	CLCN6	ENST00000376491.7,ENST00000494028.1,ENST00000312413.10,ENST00000376492.3,ENST00000376490.7,ENST00000346436.10,ENST00000376496.4,ENST00000376497.7	processed_transcript,protein_coding	1.58183e-11	7.60264e-11	1.79465	6.47391	2.07448e-11	1.79589e-10	-0.0616901	5.39819	0.762091	1
ENSG00000120937	NPPB	ENST00000376468.3	protein_coding	0.00290116	0.00612584	5.31788	-1.9442	0.0897432	0.182266	-5.12548e-15	-3.2253	1	1
ENSG00000224904	RP5-934G17.6	ENST00000438808.1	processed_pseudogene	7.51989e-05	0.000197794	5.88753	-1.72122	0.0242409	0.059219	-5.12548e-15	-3.2253	1	1
ENSG00000116685	KIAA2013	ENST00000376576.3,ENST00000616327.1,ENST00000376572.7	protein_coding	0.00225246	0.00483653	0.628146	6.07467	0.10509	0.208099	0.723985	6.24355	6.08911e-05	0.000370018
ENSG00000083444	PLOD1	ENST00000465920.1,ENST00000449038.5,ENST00000485046.5,ENST00000481933.1,ENST00000196061.4,ENST00000470133.1,ENST00000429000.6,ENST00000358133.5,ENST00000491536.5	processed_transcript,retained_intron,protein_coding	1.25245e-18	9.13985e-18	-0.468677	4.51573	0.0828247	0.169995	0.820955	5.2936	3.81013e-06	2.7411e-05
ENSG00000116688	MFN2	ENST00000235329.9,ENST00000444836.5,ENST00000484391.5,ENST00000412236.1,ENST00000497302.1,ENST00000490079.5	processed_transcript,protein_coding	1.76225e-07	6.07149e-07	-0.882255	6.3344	0.000897737	0.00300246	0.442582	7.04842	0.104244	0.293076
ENSG00000270914	RP5-1077B9.5	ENST00000603287.1	processed_pseudogene	0.182941	0.251639	1.9927	-2.32677	0.681087	0.942069	-2.34027	-3.05521	1	1
ENSG00000116691	MIIP	ENST00000235332.5,ENST00000460823.1,ENST00000492256.1,ENST00000498685.5,ENST00000478299.1,ENST00000466860.5,ENST00000478749.5	processed_transcript,protein_coding	0.112443	0.1702	0.127256	4.30421	0.75297	1	0.453274	4.58969	0.113817	0.315473
ENSG00000120949	TNFRSF8	ENST00000413146.6,ENST00000479933.2,ENST00000417814.3,ENST00000514649.5,ENST00000263932.6	nonsense_mediated_decay,processed_transcript,protein_coding	8.6717e-18	6.09476e-17	2.0896	-0.655071	0.00853436	0.0234079	-2.92788	-2.05429	0.0326075	0.110254
ENSG00000028137	TNFRSF1B	ENST00000376259.6,ENST00000489921.1,ENST00000536782.2,ENST00000492361.1	processed_transcript,protein_coding	4.04157e-51	7.70282e-50	-2.44002	4.3147	2.90622e-13	2.96364e-12	1.50616	6.0781	3.78916e-10	4.19416e-09
ENSG00000048707	VPS13D	ENST00000543766.2,ENST00000487188.1,ENST00000011700.10,ENST00000460333.5,ENST00000476045.5,ENST00000613099.4,ENST00000469054.1,ENST00000620676.4,ENST00000543710.5,ENST00000473099.1,ENST00000481484.1,ENST00000466732.2,ENST00000476169.1,ENST00000489961.1	nonsense_mediated_decay,processed_transcript,retained_intron,protein_coding	0.976528	0.978577	0.0613464	6.95537	0.839496	1	0.046227	7.05371	0.76086	1
ENSG00000229484	RP5-888M10.2	ENST00000416696.1	lincRNA	0.257821	0.341231	1.03072	-2.47703	1	1	0.808291	-2.76612	1	1
ENSG00000162496	DHRS3	ENST00000464917.5,ENST00000482265.1,ENST00000616661.4,ENST00000430996.2	retained_intron,protein_coding	2.77903e-09	1.12554e-08	6.90435	-1.0047	3.91772e-05	0.00016405	3.14856	-2.90378	0.52202	0.980779
ENSG00000272482	RP11-474O21.5	ENST00000606790.1	lincRNA	1.15528e-05	3.33866e-05	5.81549	-1.72727	0.00526398	0.0151304	-5.12548e-15	-3.2253	1	1
ENSG00000188984	AADACL3	ENST00000359318.7,ENST00000620146.2	processed_transcript,protein_coding	0.61423	0.680069	2.96192	-2.62475	1	1	-5.12548e-15	-3.2253	1	1
ENSG00000157330	C1orf158	ENST00000376210.3,ENST00000474179.1,ENST00000614859.4	processed_transcript,protein_coding	0.341656	0.439006	0	-2.80372	1	1	-5.12548e-15	-3.2253	1	1
ENSG00000116721	PRAMEF1	ENST00000400814.3,ENST00000332296.7	processed_transcript,protein_coding	0.770289	0.817364	0	-2.80372	1	1	-5.12548e-15	-3.2253	1	1
ENSG00000239810	PRAMEF11	ENST00000619922.1	protein_coding	0.00758675	0.0148706	5.06943	-2.05945	0.102611	0.203504	-5.12548e-15	-3.2253	1	1
ENSG00000231103	PRAMEF30P	ENST00000438176.2	unprocessed_pseudogene	0.61423	0.680069	2.96192	-2.62475	1	1	-5.12548e-15	-3.2253	1	1
ENSG00000179172	HNRNPCL1	ENST00000317869.6	protein_coding	0.396171	0.498329	-1.93121	-2.63801	1	1	-2.34027	-3.05521	1	1
ENSG00000120952	PRAMEF2	ENST00000240189.2	protein_coding	0.000100246	0.000259242	5.69017	-1.82443	0.0257049	0.0623386	-5.12548e-15	-3.2253	1	1
ENSG00000187545	PRAMEF10	ENST00000235347.4	protein_coding	0.174239	0.241276	3.8541	-2.46383	0.312854	0.479929	-5.12548e-15	-3.2253	1	1
ENSG00000204510	PRAMEF7	ENST00000616979.4,ENST00000330881.6	protein_coding	0.175165	0.24238	3.9239	-2.4599	0.312854	0.479929	-5.12548e-15	-3.2253	1	1
ENSG00000274178	PRAMEF28P	ENST00000610289.2	unprocessed_pseudogene	0.61423	0.680069	2.96192	-2.62475	1	1	-5.12548e-15	-3.2253	1	1
ENSG00000274764	PRAMEF27	ENST00000436041.5	protein_coding	0.60401	0.680069	3.00207	-2.62279	1	1	-5.12548e-15	-3.2253	1	1
ENSG00000277058	HNRNPCL3	ENST00000617807.2	protein_coding	0.776051	0.81884	0	-2.80372	1	1	-5.12548e-15	-3.2253	1	1
ENSG00000277862	PRAMEF34P	ENST00000611860.1	unprocessed_pseudogene	0.61423	0.680069	2.96192	-2.62475	1	1	-5.12548e-15	-3.2253	1	1
ENSG00000275774	HNRNPCL2	ENST00000621994.2	protein_coding	0.770289	0.817364	0	-2.80372	1	1	-5.12548e-15	-3.2253	1	1
ENSG00000250894	PRAMEF31P	ENST00000504262.1	unprocessed_pseudogene	0.0406687	0.0678024	4.48841	-2.31164	0.190109	0.331684	-5.12548e-15	-3.2253	1	1
ENSG00000204501	PRAMEF15	ENST00000376152.2	protein_coding	0.0391764	0.0655397	4.39582	-2.31757	0.190109	0.331684	-5.12548e-15	-3.2253	1	1
ENSG00000204481	PRAMEF14	ENST00000602491.1,ENST00000334600.6	processed_transcript,protein_coding	0.61423	0.680069	2.96192	-2.62475	1	1	-5.12548e-15	-3.2253	1	1
ENSG00000204480	PRAMEF19	ENST00000376101.2	protein_coding	0.45974	0.559869	2.96192	-2.62475	1	1	-5.12548e-15	-3.2253	1	1
ENSG00000204479	PRAMEF17	ENST00000376098.4	protein_coding	0.61423	0.680069	2.96192	-2.62475	1	1	-5.12548e-15	-3.2253	1	1
ENSG00000204478	PRAMEF20	ENST00000602960.1,ENST00000316412.9	protein_coding	0.0198736	0.0359096	4.78587	-2.18341	0.120517	0.232546	-5.12548e-15	-3.2253	1	1
ENSG00000162494	LRRC38	ENST00000376085.3	protein_coding	0.0309671	0.0540497	4.8965	-2.17547	0.0791691	0.163057	-5.12548e-15	-3.2253	1	1
ENSG00000116731	PRDM2	ENST00000502724.5,ENST00000503842.5,ENST00000502727.5,ENST00000487453.1,ENST00000491815.1,ENST00000343137.8,ENST00000311066.9,ENST00000484063.6,ENST00000235372.11,ENST00000491134.5,ENST00000413440.5,ENST00000407521.7,ENST00000376048.9,ENST00000505823.5	nonsense_mediated_decay,processed_transcript,retained_intron,protein_coding	0.0304808	0.0533085	0.356164	6.87087	0.211002	0.364268	-0.530267	6.54778	0.000749408	0.00377061
ENSG00000189337	KAZN	ENST00000636564.1,ENST00000400798.6,ENST00000503743.5,ENST00000361144.9,ENST00000636203.1,ENST00000491547.1,ENST00000376028.8,ENST00000400797.3,ENST00000376030.6	retained_intron,protein_coding	1.67977e-71	4.50191e-70	-2.08671	2.70496	2.13861e-08	1.35328e-07	-6.94361	2.43114	2.04185e-41	9.11284e-40
ENSG00000171729	TMEM51	ENST00000376008.2,ENST00000451326.6,ENST00000428417.5,ENST00000400796.7,ENST00000376014.7,ENST00000434578.6	protein_coding	9.08418e-06	2.65887e-05	6.03277	-1.62581	0.00807265	0.0222713	-5.12548e-15	-3.2253	1	1
ENSG00000278480	RP5-903E17.2	ENST00000612442.1	processed_pseudogene	0.0480562	0.0788737	4.39582	-2.31757	0.190109	0.331684	-5.12548e-15	-3.2253	1	1
ENSG00000142621	FHAD1	ENST00000472449.1,ENST00000477846.5,ENST00000459961.1,ENST00000375997.8,ENST00000472131.5,ENST00000375998.8,ENST00000495195.5,ENST00000314668.13,ENST00000375996.6,ENST00000529606.5,ENST00000483120.1,ENST00000444385.5,ENST00000471347.5,ENST00000462113.1,ENST00000433640.6,ENST00000483694.1,ENST00000375995.3,ENST00000472086.1,ENST00000358897.8,ENST00000532408.1,ENST00000481324.5,ENST00000524761.5	nonsense_mediated_decay,processed_transcript,retained_intron,protein_coding	4.45087e-11	2.07954e-10	6.96481	-0.945483	1.19878e-05	5.40602e-05	-5.12548e-15	-3.2253	1	1
ENSG00000228140	RP3-467K16.4	ENST00000427824.1	lincRNA	2.06574e-06	6.45605e-06	3.50554	-0.612638	0.00768014	0.0213004	0.260766	-2.13798	1	1
ENSG00000142634	EFHD2	ENST00000375980.8,ENST00000445566.1	protein_coding	7.73246e-07	2.51539e-06	0.224717	6.27073	0.382888	0.575988	0.680597	6.64068	0.00267098	0.0119708
ENSG00000162438	CTRC	ENST00000483406.1,ENST00000476813.5,ENST00000375943.6,ENST00000375949.4	processed_transcript,protein_coding	2.33525e-10	1.03173e-09	4.93848	-0.261022	2.48057e-07	1.38822e-06	0.489219	-2.52507	1	1
ENSG00000142615	CELA2A	ENST00000497590.1,ENST00000459653.1,ENST00000359621.4	processed_transcript,protein_coding	7.59069e-06	2.24224e-05	5.80151	-1.72928	0.0057266	0.0162543	-5.12548e-15	-3.2253	1	1
ENSG00000215704	CELA2B	ENST00000422901.1,ENST00000375910.7,ENST00000488764.1,ENST00000494280.1	processed_transcript,protein_coding	0.0391764	0.0655397	4.39582	-2.31757	0.190109	0.331684	-5.12548e-15	-3.2253	1	1
ENSG00000132906	CASP9	ENST00000400777.7,ENST00000469637.1,ENST00000333868.9,ENST00000546969.1,ENST00000440484.1,ENST00000424908.5,ENST00000375890.8,ENST00000474305.2,ENST00000447522.5,ENST00000546424.5,ENST00000348549.9	nonsense_mediated_decay,retained_intron,protein_coding	0.00855642	0.0164547	0.344089	4.07621	0.209145	0.361316	-0.871327	3.63522	9.47101e-05	0.000555892
ENSG00000116138	DNAJC16	ENST00000375838.5,ENST00000375849.5,ENST00000495523.1,ENST00000616884.4,ENST00000483270.1,ENST00000475133.5,ENST00000375847.7,ENST00000472665.1,ENST00000490811.1,ENST00000479655.1	nonsense_mediated_decay,processed_transcript,protein_coding	0.0297234	0.0521063	-0.922601	5.39481	0.00116945	0.00383703	-0.156146	5.80501	0.41163	0.856002
ENSG00000116771	AGMAT	ENST00000375826.3	protein_coding	0.000157673	0.000397693	-1.21242	2.14153	0.00846608	0.0232611	0.282299	2.78866	0.544178	1
ENSG00000235084	CHCHD2P6	ENST00000454346.1	processed_pseudogene	0.000356968	0.000860164	1.88811	-0.331368	0.00402109	0.0118649	0.0606687	-1.09607	1	1
ENSG00000236500	CD24P1	ENST00000422383.1	processed_pseudogene	3.77505e-05	0.000103029	5.61886	-1.83046	0.00847868	0.0232611	-5.12548e-15	-3.2253	1	1
ENSG00000197312	DDI2	ENST00000548451.1,ENST00000483899.1,ENST00000480945.5,ENST00000320153.10,ENST00000546927.1,ENST00000486680.1	nonsense_mediated_decay,retained_intron,protein_coding	0.0107404	0.0203345	-0.585274	6.2274	0.0283206	0.0681914	0.499399	6.86449	0.0123444	0.0470712
ENSG00000271742	RP4-680D5.9	ENST00000606262.1	lincRNA	0.410907	0.51302	-2.73312	-2.48948	1	1	-3.18992	-2.90309	0.52202	0.980779
ENSG00000116786	PLEKHM2	ENST00000375793.2,ENST00000477849.1,ENST00000462455.1,ENST00000375799.7	processed_transcript,protein_coding	8.13063e-14	4.54146e-13	2.01839	7.51573	6.10439e-12	5.57265e-11	0.243048	6.41629	0.112052	0.311473
ENSG00000162461	SLC25A34	ENST00000489568.1,ENST00000294454.5,ENST00000465495.1	processed_transcript,protein_coding	1.3587e-05	3.89835e-05	1.27223	0.919719	0.0238574	0.0586267	-1.32153	-0.0931979	0.0384235	0.127296
ENSG00000162460	TMEM82	ENST00000465575.1,ENST00000375782.1	processed_transcript,protein_coding	6.60914e-06	1.96408e-05	5.81549	-1.72727	0.00526398	0.0151304	-5.12548e-15	-3.2253	1	1
ENSG00000162458	FBLIM1	ENST00000502739.5,ENST00000430076.5,ENST00000509138.1,ENST00000483633.6,ENST00000502638.5,ENST00000510929.5,ENST00000332305.5,ENST00000508310.5,ENST00000375771.5,ENST00000514156.1,ENST00000441801.6,ENST00000431771.6,ENST00000510393.5,ENST00000375766.7,ENST00000496928.6	processed_transcript,protein_coding	1.33229e-11	6.42746e-11	4.64343	-1.22009	0.00348579	0.0104073	1.34188	-2.64043	0.656024	1
ENSG00000224321	RPL12P14	ENST00000431782.1	processed_pseudogene	0.153893	0.225443	1.9927	-2.32677	0.681087	0.942069	-2.34027	-3.05521	1	1
ENSG00000233954	UQCRHL	ENST00000483273.2	protein_coding	0.0878935	0.136104	0.439263	-0.612511	0.641034	0.902785	1.02206	-0.227601	0.0617709	0.190412
ENSG00000178715	RP11-169K16.8	ENST00000321418.6	processed_pseudogene	0.0439691	0.0727702	0.286621	-0.790928	0.86072	1	-1.9783	-1.41635	0.0210346	0.0754098
ENSG00000065526	SPEN	ENST00000471538.1,ENST00000442985.1,ENST00000438066.1,ENST00000375759.7,ENST00000487496.1	processed_transcript,protein_coding	0.982476	0.983798	0.357	8.09233	0.213573	0.368368	0.131387	8.07611	0.411017	0.854894
ENSG00000116809	ZBTB17	ENST00000490899.1,ENST00000487785.1,ENST00000462525.1,ENST00000474511.1,ENST00000444358.1,ENST00000492834.1,ENST00000488008.1,ENST00000537142.5,ENST00000472658.1,ENST00000440560.5,ENST00000494020.1,ENST00000375733.6,ENST00000471805.5,ENST00000479282.5,ENST00000375743.8,ENST00000464719.1	processed_transcript,protein_coding	4.91431e-18	3.48765e-17	2.28762	6.01546	9.18087e-14	9.7962e-13	0.264218	4.71638	0.181737	0.455981
ENSG00000224966	TBC1D3P6	ENST00000505954.1	unprocessed_pseudogene	8.52466e-10	3.6131e-09	6.61247	-1.21621	0.00012384	0.000480059	-5.12548e-15	-3.2253	1	1
ENSG00000183888	C1orf64	ENST00000329454.2	protein_coding	4.25177e-07	1.41549e-06	6.33125	-1.4458	0.00554887	0.015844	-5.12548e-15	-3.2253	1	1
ENSG00000173641	HSPB7	ENST00000487046.1,ENST00000463576.5,ENST00000442459.2,ENST00000406363.2,ENST00000311890.13,ENST00000375718.4,ENST00000411503.5	retained_intron,protein_coding	7.53619e-12	3.71013e-11	7.10141	-0.827541	8.20753e-06	3.78609e-05	-5.12548e-15	-3.2253	1	1
ENSG00000186510	CLCNKA	ENST00000491433.1,ENST00000439316.6,ENST00000331433.4,ENST00000464764.5,ENST00000495784.1,ENST00000375692.5,ENST00000477360.2	processed_transcript,protein_coding	2.17161e-18	1.56372e-17	7.97381	-0.0892506	5.87502e-07	3.15173e-06	-5.12548e-15	-3.2253	1	1
ENSG00000232456	RP11-5P18.10	ENST00000447882.1	unprocessed_pseudogene	0.00722096	0.0142075	4.84104	-2.17945	0.0791691	0.163057	-5.12548e-15	-3.2253	1	1
ENSG00000184908	CLCNKB	ENST00000375679.8,ENST00000431772.1,ENST00000619181.4,ENST00000375667.7	protein_coding	1.49946e-12	7.74164e-12	7.14001	-0.817322	1.09299e-05	4.95127e-05	-5.12548e-15	-3.2253	1	1
ENSG00000185519	FAM131C	ENST00000494078.1,ENST00000375662.4	processed_transcript,protein_coding	4.22288e-07	1.40719e-06	4.7546	-1.09246	0.000103246	0.000404986	-0.0351495	-2.90331	1	1
ENSG00000142627	EPHA2	ENST00000358432.7,ENST00000461614.1,ENST00000480202.1,ENST00000462805.1	processed_transcript,protein_coding	6.55065e-18	4.62433e-17	2.36863	-0.232612	0.000573433	0.00197992	-5.51412	-1.97582	0.00194868	0.00901253
ENSG00000142632	ARHGEF19	ENST00000471928.1,ENST00000449495.1,ENST00000441785.1,ENST00000478117.5,ENST00000478210.1,ENST00000270747.7	processed_transcript,protein_coding	0.028302	0.0497865	1.15007	2.50029	0.000538855	0.00186758	0.274392	2.11765	0.359445	0.768506
ENSG00000237276	ANO7L1	ENST00000475369.1,ENST00000602586.1,ENST00000442385.5	transcribed_unprocessed_pseudogene,processed_transcript	0.0108454	0.0205198	2.16587	-0.607404	0.00471193	0.0137212	-0.39797	-1.64032	0.851849	1
ENSG00000132881	RSG1	ENST00000375599.7,ENST00000434014.1	protein_coding	0.023249	0.0414773	-1.33138	1.93029	0.00160361	0.00513257	-1.08039	2.01346	0.000943187	0.004657
ENSG00000233929	MT1XP1	ENST00000421314.1	processed_pseudogene	1.45708e-08	5.54948e-08	4.89471	-0.329706	2.62509e-07	1.46423e-06	0.875123	-2.41835	0.727629	1
ENSG00000037637	FBXO42	ENST00000478089.1,ENST00000456164.5,ENST00000375592.7,ENST00000444116.1	processed_transcript,protein_coding	0.20581	0.278875	-0.666655	5.32802	0.0112598	0.0299861	-0.0305398	5.70628	0.859784	1
ENSG00000055070	SZRD1	ENST00000492354.1,ENST00000401088.8,ENST00000472351.5,ENST00000486763.5,ENST00000472461.1,ENST00000475554.5,ENST00000471507.5,ENST00000476423.5,ENST00000475078.1,ENST00000401089.3	nonsense_mediated_decay,processed_transcript,protein_coding	0.0139322	0.0259038	-0.921725	6.93139	0.000425245	0.00150662	0.0481525	7.44666	0.786681	1
ENSG00000187144	SPATA21	ENST00000491418.5,ENST00000540400.1,ENST00000466212.5,ENST00000335496.5,ENST00000375577.5,ENST00000612240.1	processed_transcript,protein_coding	6.4523e-05	0.000171106	3.25777	-1.47865	0.0094719	0.0257323	0.875366	-2.41833	0.711601	1
ENSG00000157191	NECAP2	ENST00000486390.1,ENST00000337132.9,ENST00000504551.6,ENST00000492095.5,ENST00000457722.6,ENST00000459640.5,ENST00000508680.5,ENST00000513161.1,ENST00000509727.1,ENST00000496239.5,ENST00000443980.6,ENST00000504858.5	nonsense_mediated_decay,processed_transcript,retained_intron,protein_coding	0.246092	0.327074	-0.118855	5.6758	0.663399	0.930555	-0.235241	5.72573	0.223422	0.540769
ENSG00000226029	LINC01772	ENST00000457898.1	lincRNA	0.0272503	0.0480844	-1.5253	1.2689	0.0192311	0.0486012	0.295136	1.93719	0.469783	0.948885
ENSG00000080947	CROCCP3	ENST00000420820.6,ENST00000589964.1,ENST00000590118.5,ENST00000591316.1,ENST00000591348.5,ENST00000263511.8	transcribed_unprocessed_pseudogene,processed_transcript,retained_intron	0.000744286	0.00172102	2.11923	2.34026	2.76931e-09	1.93067e-08	0.689248	1.52606	0.0506642	0.160823
ENSG00000261135	RP4-798A10.7	ENST00000562878.1	lincRNA	1.171e-15	7.31302e-15	5.40744	0.667422	4.99313e-15	5.84419e-14	1.10793	-2.05632	0.579443	1
ENSG00000224174	RP4-798A10.4	ENST00000452795.2	lincRNA	0.0515819	0.0840224	4.39582	-2.31757	0.190109	0.331684	-5.12548e-15	-3.2253	1	1
ENSG00000233421	LINC01783	ENST00000415386.2,ENST00000614408.1	lincRNA,pseudogene	4.86382e-20	3.79986e-19	-6.99676	-0.203104	7.63829e-06	3.54137e-05	-7.52259	-0.492114	4.65756e-10	5.11238e-09
ENSG00000268991	FAM231B	ENST00000600179.2	protein_coding	0.160252	0.2309	3.9239	-2.4599	0.312854	0.479929	-5.12548e-15	-3.2253	1	1
ENSG00000225710	RP5-875O13.6	ENST00000438396.1	unprocessed_pseudogene	0.647054	0.711513	0	-2.80372	1	1	-5.12548e-15	-3.2253	1	1
ENSG00000219481	NBPF1	ENST00000449853.2,ENST00000430580.6,ENST00000599908.1,ENST00000599069.5,ENST00000392963.5,ENST00000420513.1,ENST00000432949.5	nonsense_mediated_decay,processed_transcript,protein_coding	4.38733e-09	1.74968e-08	-0.863273	5.00786	0.00097887	0.00325679	-0.971632	5.06585	9.75818e-05	0.000571803
ENSG00000271732	RP5-1182A14.5	ENST00000607700.1	lincRNA	0.0487656	0.0798292	4.4265	-2.31559	0.190109	0.331684	-5.12548e-15	-3.2253	1	1
ENSG00000215908	CROCCP2	ENST00000412962.4,ENST00000639456.1,ENST00000639481.1,ENST00000640476.1,ENST00000362058.2,ENST00000635081.1,ENST00000639594.1	transcribed_unprocessed_pseudogene,processed_transcript	0.129676	0.193555	0.636407	6.46446	0.0356856	0.0841951	0.0269787	6.23411	0.868023	1
ENSG00000186301	MST1P2	ENST00000457982.3	unprocessed_pseudogene	1.41454e-30	1.63059e-29	2.55916	0.964332	3.41035e-07	1.8793e-06	0.123468	-0.342921	0.81545	1
ENSG00000282143	RP1-163M9.8	ENST00000633763.1	lincRNA	0.0542361	0.0879742	4.45737	-2.31361	0.190109	0.331684	2.30325	-3.05558	1	1
ENSG00000236698	EIF1AXP1	ENST00000419267.1	processed_pseudogene	0.0971448	0.149103	-0.960867	-1.12718	0.446934	0.661726	0.845811	-0.553953	0.154827	0.408127
ENSG00000268869	ESPNP	ENST00000414828.1,ENST00000492551.2,ENST00000270691.8	transcribed_unprocessed_pseudogene,processed_transcript	8.74119e-13	4.58103e-12	7.27527	-0.703183	3.35615e-06	1.63292e-05	-5.12548e-15	-3.2253	1	1
ENSG00000282740	RP5-1182A14.7	ENST00000633433.1	lincRNA	0.690244	0.748688	-1.93121	-2.63801	1	1	-2.34027	-3.05521	1	1
ENSG00000058453	CROCC	ENST00000465021.5,ENST00000486318.1,ENST00000498688.5,ENST00000465291.1,ENST00000492631.5,ENST00000497654.2,ENST00000466256.6,ENST00000467715.2,ENST00000445545.6,ENST00000477773.1,ENST00000467938.5,ENST00000494191.6,ENST00000375541.9	processed_transcript,retained_intron,protein_coding	2.22831e-06	6.9384e-06	1.57617	4.07722	5.7573e-07	3.09117e-06	0.657174	3.58653	0.0238466	0.0837732
ENSG00000227684	CROCCP4	ENST00000633627.1,ENST00000457096.1	transcribed_unprocessed_pseudogene,processed_transcript	0.515738	0.613487	2.96192	-2.62475	1	1	-5.12548e-15	-3.2253	1	1
ENSG00000186715	MST1L	ENST00000624762.3,ENST00000545160.1,ENST00000544155.1,ENST00000442552.7,ENST00000455405.6	transcribed_unprocessed_pseudogene,processed_transcript	2.98755e-19	2.25422e-18	3.99576	-0.300233	0.000233983	0.000868012	1.97552	-1.36935	0.0367538	0.122518
ENSG00000223643	RP11-108M9.1	ENST00000414340.6,ENST00000422345.1	lincRNA	0.805448	0.829111	0	-2.80372	1	1	-5.12548e-15	-3.2253	1	1
ENSG00000228549	RP11-108M9.3	ENST00000619677.1,ENST00000453554.1,ENST00000457856.1,ENST00000451828.1,ENST00000438002.1	lincRNA,pseudogene	3.83431e-27	3.94021e-26	-3.88175	0.472574	1.95189e-06	9.79311e-06	-8.29414	0.191773	3.80443e-16	6.48943e-15
ENSG00000238142	RP11-108M9.4	ENST00000422124.1,ENST00000416869.1,ENST00000457075.1	lincRNA	0.00222494	0.00478417	-3.61955	-2.23414	0.312854	0.479929	-1.80392	-2.52437	0.420125	0.867919
ENSG00000272426	RP11-108M9.6	ENST00000606899.1	lincRNA	1.49254e-18	1.08474e-17	4.83697	0.805875	7.30181e-11	5.99892e-10	-0.736362	-2.22501	0.811255	1
ENSG00000117122	MFAP2	ENST00000375535.3,ENST00000490075.5,ENST00000492598.1,ENST00000375534.7,ENST00000478684.5,ENST00000476788.5	processed_transcript,protein_coding	1.64845e-55	3.39231e-54	-2.47879	0.660524	0.000172418	0.000652172	-8.4194	0.306451	8.50724e-16	1.4164e-14
ENSG00000159363	ATP13A2	ENST00000511957.5,ENST00000466561.1,ENST00000506174.5,ENST00000452699.5,ENST00000508222.5,ENST00000510069.5,ENST00000503552.1,ENST00000509392.1,ENST00000502418.1,ENST00000326735.12,ENST00000341676.9,ENST00000509619.1,ENST00000463860.5,ENST00000617114.4,ENST00000502860.1	retained_intron,protein_coding	2.15867e-57	4.61438e-56	-3.39631	6.33945	4.79964e-20	8.12207e-19	-2.85685	6.48936	4.32884e-64	3.31394e-62
ENSG00000117118	SDHB	ENST00000491274.5,ENST00000463045.2,ENST00000485092.5,ENST00000375499.7,ENST00000485515.5,ENST00000475506.1,ENST00000475049.5,ENST00000466613.2	processed_transcript,retained_intron,protein_coding	1.07257e-06	3.44256e-06	-0.384715	5.17755	0.147489	0.279077	0.850067	5.9433	0.00208453	0.00955658
ENSG00000117115	PADI2	ENST00000375481.1,ENST00000375486.8,ENST00000466151.1,ENST00000479534.5	processed_transcript,protein_coding	4.08448e-25	3.92267e-24	5.35772	0.604935	4.08258e-12	3.77907e-11	3.35727	-0.736302	0.000367682	0.00195738
ENSG00000204362	RP11-380J14.1	ENST00000634972.1,ENST00000412427.1	lincRNA	0.0461819	0.0760235	4.39582	-2.31757	0.190109	0.331684	-5.12548e-15	-3.2253	1	1
ENSG00000282843	RP11-380J14.4	ENST00000635428.1	lincRNA	0.61423	0.680069	2.96192	-2.62475	1	1	-5.12548e-15	-3.2253	1	1
ENSG00000142623	PADI1	ENST00000460293.1,ENST00000483501.1,ENST00000375471.4	processed_transcript,protein_coding	4.80905e-05	0.000129482	5.61886	-1.83046	0.00847868	0.0232611	-5.12548e-15	-3.2253	1	1
ENSG00000142619	PADI3	ENST00000375460.3	protein_coding	5.1583e-11	2.39886e-10	3.20909	-0.609605	0.000101826	0.000399905	-4.4143	-2.5241	0.0979795	0.27845
ENSG00000159339	PADI4	ENST00000487048.5,ENST00000468945.1,ENST00000375448.4,ENST00000375453.5,ENST00000467001.1	processed_transcript,protein_coding	4.75681e-45	8.01147e-44	-2.27247	1.65696	2.26124e-05	9.77833e-05	-9.5163	1.3415	6.81948e-22	1.58362e-20
ENSG00000276747	PADI6	ENST00000619609.1	protein_coding	6.39646e-08	2.30114e-07	6.12086	-1.54162	0.00139769	0.00450188	-5.12548e-15	-3.2253	1	1
ENSG00000179051	RCC2	ENST00000474892.1,ENST00000375436.8,ENST00000375433.3	processed_transcript,protein_coding	1.25783e-14	7.4058e-14	-2.43956	8.62445	7.87536e-19	1.22336e-17	-0.23212	9.37332	0.284738	0.638112
ENSG00000074964	ARHGEF10L	ENST00000469726.5,ENST00000495593.1,ENST00000167825.5,ENST00000482892.1,ENST00000466782.1,ENST00000482359.1,ENST00000361221.7,ENST00000375415.5,ENST00000375408.7	nonsense_mediated_decay,processed_transcript,retained_intron,protein_coding	8.1752e-36	1.09919e-34	3.92485	-1.09466	0.003541	0.0105642	4.41215	-0.346902	4.09828e-06	2.93389e-05
ENSG00000117148	ACTL8	ENST00000617065.1,ENST00000375406.1	protein_coding	0.101556	0.15524	-5.12259	-1.5251	0.0189212	0.0480596	-1.26571	-1.58043	0.180943	0.454417
ENSG00000261781	LINC01654	ENST00000569711.1	lincRNA	0.61423	0.680069	2.96192	-2.62475	1	1	-5.12548e-15	-3.2253	1	1
ENSG00000117154	IGSF21	ENST00000497331.2,ENST00000473951.1,ENST00000251296.3,ENST00000412684.3	processed_transcript,retained_intron,protein_coding	0.07831	0.122761	3.88882	-2.46187	0.312854	0.479929	-5.12548e-15	-3.2253	1	1
ENSG00000179023	KLHDC7A	ENST00000400664.2	protein_coding	1.01983e-11	4.96873e-11	6.91621	-1.00265	9.27126e-05	0.000366816	-5.12548e-15	-3.2253	1	1
ENSG00000009709	PAX7	ENST00000400661.3,ENST00000375375.7,ENST00000420770.6	protein_coding	1.63575e-06	5.15855e-06	6.12086	-1.54162	0.00139769	0.00450188	-5.12548e-15	-3.2253	1	1
ENSG00000179002	TAS1R2	ENST00000375371.3	protein_coding	0.0435016	0.072071	0	-2.80372	1	1	-5.12548e-15	-3.2253	1	1
ENSG00000255275	RP13-279N23.2	ENST00000494072.3	nonsense_mediated_decay	4.28859e-06	1.29748e-05	1.10435	-1.11967	0.234582	0.401145	-5.23154	-2.13657	0.00660564	0.0269928
ENSG00000159423	ALDH4A1	ENST00000432718.1,ENST00000375341.7,ENST00000538839.5,ENST00000290597.9,ENST00000454547.1,ENST00000538309.5	processed_transcript,protein_coding	2.21144e-30	2.5337e-29	-1.93113	4.36351	2.10621e-09	1.4875e-08	-2.45147	4.34378	1.83962e-18	3.53561e-17
ENSG00000169991	IFFO2	ENST00000416166.1,ENST00000355609.8,ENST00000455833.6	protein_coding	1.42497e-85	4.74497e-84	0.728883	5.49341	0.0188293	0.0479004	-4.50173	4.25911	1.16847e-64	9.07548e-63
ENSG00000127481	UBR4	ENST00000467272.6,ENST00000459947.5,ENST00000465036.1,ENST00000425413.5,ENST00000417040.1,ENST00000375224.1,ENST00000494503.1,ENST00000466969.1,ENST00000483922.1,ENST00000486515.1,ENST00000492606.1,ENST00000419533.1,ENST00000375254.7,ENST00000475973.1,ENST00000375225.7,ENST00000497018.1,ENST00000375218.3	processed_transcript,retained_intron,protein_coding	3.14396e-15	1.91595e-14	1.80968	10.3319	7.96635e-11	6.50812e-10	0.0189997	9.27739	0.905711	1
ENSG00000127463	EMC1	ENST00000461353.1,ENST00000486405.1,ENST00000467423.1,ENST00000375199.7,ENST00000475079.1,ENST00000480380.1,ENST00000488681.1,ENST00000375208.7,ENST00000494770.5,ENST00000356068.2,ENST00000462505.1,ENST00000477853.5,ENST00000486238.1,ENST00000496654.1	nonsense_mediated_decay,processed_transcript,retained_intron,protein_coding	1.10061e-11	5.34761e-11	-1.35508	6.38676	2.3864e-07	1.33997e-06	0.487005	7.27434	0.00287127	0.0127772
ENSG00000053372	MRTO4	ENST00000479559.1,ENST00000493700.1,ENST00000330263.4	processed_transcript,protein_coding	0.0002561	0.000629819	-0.256544	6.20061	0.330814	0.504601	0.635918	6.78016	0.0192453	0.0695954
ENSG00000211454	AKR7L	ENST00000493176.1,ENST00000420396.3,ENST00000429712.5,ENST00000457194.6	polymorphic_pseudogene,retained_intron,protein_coding	0.0108338	0.0205004	-1.59509	-0.438245	0.097519	0.196006	-0.0451284	-0.0960184	1	1
ENSG00000162482	AKR7A3	ENST00000361640.4	protein_coding	0.159868	0.2309	-1.20143	0.36764	0.0893872	0.182266	0.141738	0.818943	0.771053	1
ENSG00000053371	AKR7A2	ENST00000481966.1,ENST00000330072.9,ENST00000235835.7,ENST00000489286.5,ENST00000492217.1	nonsense_mediated_decay,retained_intron,protein_coding	2.94327e-08	1.09238e-07	-1.20877	4.96012	0.000150653	0.000575079	0.474845	5.78765	0.221939	0.537952
ENSG00000040487	PQLC2	ENST00000469076.5,ENST00000375153.7,ENST00000497827.1,ENST00000432465.1,ENST00000375155.7,ENST00000400548.6	nonsense_mediated_decay,protein_coding	0.00106357	0.00239964	-0.583592	4.17609	0.0608463	0.133079	-0.51751	4.29558	0.0368323	0.122749
ENSG00000077549	CAPZB	ENST00000489607.5,ENST00000375144.5,ENST00000482808.1,ENST00000433834.5,ENST00000375142.5,ENST00000264202.7,ENST00000459967.6,ENST00000264203.7,ENST00000457768.5	processed_transcript,protein_coding	2.9958e-06	9.20456e-06	-1.63744	6.93165	1.45408e-09	1.04305e-08	-0.25287	7.50941	0.293656	0.652704
ENSG00000173436	MINOS1	ENST00000462646.5,ENST00000486890.5,ENST00000485362.1,ENST00000617872.4,ENST00000467029.5,ENST00000498642.5,ENST00000479642.1,ENST00000498067.1,ENST00000481464.5,ENST00000322753.6	processed_transcript,protein_coding	1.59223e-09	6.5676e-09	1.47637	2.62901	0.000127684	0.000493703	1.56645	2.85311	2.26267e-08	2.10726e-07
ENSG00000270136	MINOS1-NBL1	ENST00000602384.5,ENST00000602450.1,ENST00000602293.5,ENST00000602662.1	nonsense_mediated_decay,protein_coding	0.651766	0.715677	0	-2.80372	1	1	2.30325	-3.05558	1	1
ENSG00000226396	RP5-1056L3.3	ENST00000457263.1	processed_pseudogene	6.07612e-09	2.39453e-08	-1.16583	-0.493697	0.210101	0.362829	1.86524	0.917975	1.74914e-05	0.000115004
ENSG00000158747	NBL1	ENST00000618761.4,ENST00000621723.4,ENST00000439664.5,ENST00000615215.4,ENST00000427894.5,ENST00000375136.7,ENST00000289749.6,ENST00000451758.5,ENST00000622566.4,ENST00000425400.5,ENST00000439278.5,ENST00000548815.2,ENST00000428975.5	protein_coding	1.00773e-21	8.51756e-21	-1.30967	0.918784	0.0213433	0.0533124	-3.91045	0.496801	4.85192e-09	4.83229e-08
ENSG00000158748	HTR6	ENST00000289753.1	protein_coding	0.0953087	0.146544	4.45737	-2.31361	0.190109	0.331684	-5.12548e-15	-3.2253	1	1
ENSG00000162542	TMCO4	ENST00000462171.1,ENST00000488449.1,ENST00000375127.5,ENST00000494342.1,ENST00000489135.5,ENST00000489814.5,ENST00000496528.5,ENST00000294543.10	processed_transcript,protein_coding	3.25694e-48	5.86176e-47	2.23981	1.7989	3.76206e-05	0.000158215	3.70183	3.30346	5.38213e-34	1.95492e-32
ENSG00000178828	RNF186	ENST00000375121.3	protein_coding	0.770289	0.817364	0	-2.80372	1	1	-5.12548e-15	-3.2253	1	1
ENSG00000169914	OTUD3	ENST00000481686.1,ENST00000375120.3,ENST00000466697.1	processed_transcript,protein_coding	0.0313464	0.0546611	-0.372978	5.09754	0.220045	0.378409	-0.297605	5.23204	0.0945515	0.271871
ENSG00000188784	PLA2G2E	ENST00000375116.3	protein_coding	0.165611	0.237488	3.88882	-2.46187	0.312854	0.479929	-5.12548e-15	-3.2253	1	1
ENSG00000188257	PLA2G2A	ENST00000469162.5,ENST00000496748.1,ENST00000461140.1,ENST00000491964.5,ENST00000482011.1,ENST00000400520.7,ENST00000375111.7	processed_transcript,protein_coding	0.228503	0.30583	2.96192	-2.62475	1	1	-5.12548e-15	-3.2253	1	1
ENSG00000117215	PLA2G2D	ENST00000617227.1,ENST00000375105.7	protein_coding	0.0431473	0.0715508	4.45737	-2.31361	0.190109	0.331684	-5.12548e-15	-3.2253	1	1
ENSG00000158786	PLA2G2F	ENST00000375102.3,ENST00000465062.1	retained_intron,protein_coding	5.76344e-08	2.08537e-07	6.26294	-1.45393	0.000748464	0.0025369	-5.12548e-15	-3.2253	1	1
ENSG00000227066	RP3-340N1.2	ENST00000417884.1,ENST00000431027.1	lincRNA	0.00010918	0.000281034	-2.26439	-1.38248	0.126377	0.242755	-2.60007	-1.70025	0.0160593	0.0592458
ENSG00000187980	PLA2G2C	ENST00000247992.5,ENST00000495760.2,ENST00000429261.2	processed_transcript,protein_coding	6.74209e-56	1.40186e-54	7.44878	-0.585714	6.58212e-05	0.000266786	9.49388	1.33911	8.45386e-23	2.05721e-21
ENSG00000162543	UBXN10	ENST00000375099.3	protein_coding	8.85884e-05	0.000230906	3.5765	-1.3127	0.0112798	0.0300318	-3.18992	-2.90309	0.52202	0.980779
ENSG00000158816	VWA5B1	ENST00000534075.1,ENST00000375079.6,ENST00000525343.1,ENST00000485375.6,ENST00000473325.5,ENST00000467486.5,ENST00000530722.5,ENST00000289815.12	nonsense_mediated_decay,processed_transcript,protein_coding	1.12595e-05	3.2583e-05	6.08482	-1.54566	0.00547945	0.0156752	-5.12548e-15	-3.2253	1	1
ENSG00000236963	LINC01141	ENST00000423486.1,ENST00000635577.1,ENST00000418743.5,ENST00000635564.1,ENST00000426428.5	lincRNA	7.06983e-05	0.000186616	5.60089	-1.83247	0.0118193	0.0312938	-5.12548e-15	-3.2253	1	1
ENSG00000162545	CAMK2N1	ENST00000489020.1,ENST00000375078.3	processed_transcript,protein_coding	1.86953e-26	1.87833e-25	8.36965	0.30109	3.95721e-08	2.42867e-07	6.9393	-0.944532	8.67286e-05	0.000511768
ENSG00000090432	MUL1	ENST00000264198.4	protein_coding	0.410877	0.51302	0.114338	4.51203	0.689018	0.951394	0.320415	4.72745	0.184825	0.461768
ENSG00000183114	FAM43B	ENST00000332947.5	protein_coding	3.06036e-06	9.39572e-06	6.16625	-1.53554	0.00328856	0.00985244	-5.12548e-15	-3.2253	1	1
ENSG00000158825	CDA	ENST00000461985.1,ENST00000375071.3	processed_transcript,protein_coding	1.48045e-08	5.63376e-08	4.45737	-2.31361	0.190109	0.331684	2.30487	-3.05545	1	1
ENSG00000158828	PINK1	ENST00000321556.4,ENST00000400490.2,ENST00000492302.1	processed_transcript,protein_coding	1.11296e-08	4.28937e-08	-0.794854	4.38479	0.00468188	0.0136374	-1.34208	4.2979	2.95311e-08	2.71863e-07
ENSG00000244038	DDOST	ENST00000375048.7,ENST00000477229.1,ENST00000602624.6,ENST00000464364.1,ENST00000475210.1,ENST00000415136.6	processed_transcript,protein_coding	2.95086e-24	2.741e-23	-1.09586	6.86671	3.15466e-05	0.000133814	0.984411	7.98971	1.34616e-08	1.27939e-07
ENSG00000117245	KIF17	ENST00000498225.1,ENST00000462858.5,ENST00000247986.2,ENST00000463389.1,ENST00000477167.5,ENST00000400463.7,ENST00000375044.5,ENST00000493818.1,ENST00000490034.5	processed_transcript,protein_coding	8.19861e-27	8.33139e-26	3.14654	0.0649655	5.17901e-05	0.000213402	3.24677	0.510866	0.000101977	0.000596139
ENSG00000235432	RP5-930J4.5	ENST00000440621.1	unprocessed_pseudogene	0.000803031	0.00183984	5.16217	-2.05348	0.0391901	0.0901052	-5.12548e-15	-3.2253	1	1
ENSG00000189410	SH2D5	ENST00000375031.5,ENST00000460804.5,ENST00000519434.1,ENST00000518294.5,ENST00000447746.6,ENST00000444387.6,ENST00000517430.5	processed_transcript,protein_coding	6.84842e-28	7.21123e-27	4.92465	1.55346	6.02901e-14	6.52667e-13	0.266608	-1.52543	0.861494	1
ENSG00000127483	HP1BP3	ENST00000312239.9,ENST00000438032.5,ENST00000443615.1,ENST00000437575.5,ENST00000424732.5,ENST00000488722.5,ENST00000419490.5,ENST00000417710.5,ENST00000414993.1,ENST00000375000.5,ENST00000419948.5,ENST00000375003.6,ENST00000487117.1,ENST00000491748.1	processed_transcript,protein_coding	0.0588459	0.0947218	-0.326109	8.0548	0.209376	0.361695	0.0853789	8.35753	0.609246	1
ENSG00000075151	EIF4G3	ENST00000400422.6,ENST00000634879.1,ENST00000435383.1,ENST00000485722.1,ENST00000476088.1,ENST00000463775.1,ENST00000634778.1,ENST00000438975.5,ENST00000264211.12,ENST00000602326.5,ENST00000356916.7,ENST00000411888.5,ENST00000374935.7,ENST00000374933.3	processed_transcript,retained_intron,protein_coding	0.322301	0.416594	-0.303044	6.47147	0.260466	0.440487	0.163032	6.80299	0.341072	0.737474
ENSG00000233072	RPS15AP6	ENST00000420703.1	processed_pseudogene	0.118515	0.178554	-1.38005	-1.82006	0.519881	0.756466	-0.0426408	-1.76564	1	1
ENSG00000236073	RP11-487E1.2	ENST00000431514.2	processed_pseudogene	0.93034	0.935309	0.520328	-1.3998	0.860469	1	0.124467	-1.58128	1	1
ENSG00000235112	HSPE1P27	ENST00000430808.1	processed_pseudogene	0.163061	0.234388	3.9239	-2.4599	0.312854	0.479929	2.30487	-3.05545	1	1
ENSG00000117298	ECE1	ENST00000374893.10,ENST00000415912.6,ENST00000463334.2,ENST00000436918.6,ENST00000526194.5,ENST00000481130.6,ENST00000264205.10,ENST00000527991.2,ENST00000357071.8,ENST00000470394.1,ENST00000528294.1,ENST00000473505.5,ENST00000531334.1	processed_transcript,retained_intron,protein_coding	1.91794e-10	8.53009e-10	-1.05191	3.89115	0.000260408	0.000959456	-0.202141	4.30368	0.465418	0.9425
ENSG00000236216	PPP1R11P1	ENST00000486095.1	processed_pseudogene	0.637894	0.703495	0	-2.80372	1	1	-5.12548e-15	-3.2253	1	1
ENSG00000227001	NBPF2P	ENST00000453025.1	unprocessed_pseudogene	0.00157929	0.00346312	-4.55854	-1.8336	0.0962192	0.193697	1.67924	-0.801407	0.00791656	0.0316821
ENSG00000187952	HS6ST1P1	ENST00000481504.2	processed_pseudogene	0.00740865	0.0145517	-1.67244	-0.376156	0.117543	0.229983	-2.45731	-0.667769	0.00733072	0.0295706
ENSG00000186543	CROCCP5	ENST00000436658.1	unprocessed_pseudogene	0.00891268	0.0170782	4.86874	-2.17746	0.0791691	0.163057	-5.12548e-15	-3.2253	1	1
ENSG00000142794	NBPF3	ENST00000318249.9,ENST00000434838.6,ENST00000477050.1,ENST00000318220.10,ENST00000619554.1,ENST00000467103.2,ENST00000475869.2,ENST00000454000.6,ENST00000469876.5,ENST00000485941.2,ENST00000486229.5,ENST00000342104.9,ENST00000478653.6	nonsense_mediated_decay,processed_transcript,protein_coding	2.849e-13	1.53844e-12	-2.64992	2.99553	1.16446e-12	1.13089e-11	-0.772636	3.46379	0.00835936	0.0332598
ENSG00000162551	ALPL	ENST00000374829.2,ENST00000374832.5,ENST00000374840.7,ENST00000374830.2,ENST00000539907.5,ENST00000468526.1,ENST00000540617.5	processed_transcript,protein_coding	1.4235e-08	5.4248e-08	6.46029	-1.36223	0.00422352	0.0124198	-5.12548e-15	-3.2253	1	1
ENSG00000076864	RAP1GAP	ENST00000495204.5,ENST00000471600.6,ENST00000542643.6,ENST00000290101.8,ENST00000464457.1,ENST00000374757.7,ENST00000374763.6,ENST00000482984.5,ENST00000374765.8,ENST00000374761.6,ENST00000317967.11,ENST00000611549.4,ENST00000447293.5	nonsense_mediated_decay,processed_transcript,retained_intron,protein_coding	2.10446e-17	1.45511e-16	3.457	0.736743	2.39903e-10	1.87013e-09	-0.80301	-1.47	0.488419	0.978367
ENSG00000090686	USP48	ENST00000529637.5,ENST00000534705.5,ENST00000400301.5,ENST00000464577.1,ENST00000479177.1,ENST00000308271.13,ENST00000489108.1,ENST00000421625.6,ENST00000471752.1,ENST00000532737.1,ENST00000527823.5,ENST00000487880.2,ENST00000374732.7,ENST00000526044.5,ENST00000374730.2	nonsense_mediated_decay,processed_transcript,retained_intron,protein_coding	0.863656	0.872517	-0.0339024	6.83033	0.927407	1	0.32439	7.12371	0.0664449	0.202808
ENSG00000187942	LDLRAD2	ENST00000484271.1,ENST00000543870.1,ENST00000344642.6	processed_transcript,protein_coding	7.78053e-07	2.53051e-06	-1.7188	3.03814	1.24608e-06	6.4066e-06	-0.702132	3.38509	0.00838405	0.0333445
ENSG00000142798	HSPG2	ENST00000453796.1,ENST00000635682.1,ENST00000486901.1,ENST00000439717.2,ENST00000481644.1,ENST00000374695.7,ENST00000374673.3,ENST00000493940.2,ENST00000471322.2,ENST00000498495.1,ENST00000412328.5,ENST00000480900.1,ENST00000374676.4	processed_transcript,retained_intron,protein_coding	2.44156e-115	1.19647e-113	5.51699	4.64573	5.24621e-40	2.56695e-38	5.05093	4.33491	2.68913e-41	1.19683e-39
ENSG00000232037	RP11-26H16.1	ENST00000423231.1	processed_pseudogene	0.60401	0.680069	3.00207	-2.62279	1	1	-5.12548e-15	-3.2253	1	1
ENSG00000283234	RP11-26H16.4	ENST00000637118.1,ENST00000636906.1	processed_transcript,transcribed_unitary_pseudogene	0.174239	0.241276	3.8541	-2.46383	0.312854	0.479929	-5.12548e-15	-3.2253	1	1
ENSG00000219073	CELA3B	ENST00000400277.2,ENST00000337107.10,ENST00000473526.1,ENST00000374666.1	processed_transcript,protein_coding	0.0214857	0.0385767	4.4265	-2.31559	0.190109	0.331684	-5.12548e-15	-3.2253	1	1
ENSG00000142789	CELA3A	ENST00000374663.1,ENST00000290122.7,ENST00000400271.2	protein_coding	0.000138275	0.000350786	5.39117	-1.94021	0.0240909	0.0589245	-5.12548e-15	-3.2253	1	1
ENSG00000228397	LINC01635	ENST00000635097.1,ENST00000455966.2	lincRNA	2.26028e-34	2.90945e-33	4.40374	2.15976	1.84473e-14	2.07564e-13	-1.10886	-1.17962	0.320663	0.701333
ENSG00000218510	LINC00339	ENST00000404210.4,ENST00000634451.1,ENST00000634934.1,ENST00000452322.1,ENST00000635450.1,ENST00000634712.1,ENST00000635675.1,ENST00000420503.1,ENST00000416769.1,ENST00000434233.1	lincRNA,pseudogene	1.58719e-07	5.49141e-07	-0.163631	3.93956	0.594478	0.844392	-1.20599	3.63855	4.20778e-07	3.39508e-06
ENSG00000070831	CDC42	ENST00000498236.1,ENST00000315554.12,ENST00000411827.1,ENST00000344548.7,ENST00000400259.5	processed_transcript,protein_coding	0.000318023	0.00077278	-1.28506	7.5832	4.44558e-05	0.000184764	0.226459	8.30769	0.173189	0.437968
ENSG00000230068	CDC42-IT1	ENST00000431803.2	sense_intronic	0.286083	0.374102	-0.322314	0.360035	0.641953	0.90392	0.242986	0.643521	0.701724	1
ENSG00000271840	RP1-224A6.9	ENST00000606754.1	lincRNA	0.13034	0.19441	0.122573	0.466669	0.954032	1	1.02557	1.03759	0.00486917	0.0205045
ENSG00000162552	WNT4	ENST00000290167.10,ENST00000441048.1,ENST00000415567.1	protein_coding	0.000632117	0.00147551	6.33125	-1.4458	0.00554887	0.015844	2.30325	-3.05558	1	1
ENSG00000234397	RP11-415K20.1	ENST00000487348.1	processed_pseudogene	0.814432	0.830765	0	-2.80372	1	1	2.30487	-3.05545	1	1
ENSG00000184677	ZBTB40	ENST00000400239.6,ENST00000375647.4,ENST00000404138.5,ENST00000374651.8	protein_coding	0.177436	0.245035	0.273309	6.40044	0.288521	0.479929	0.409377	6.5834	0.00722978	0.0292223
ENSG00000237200	ZBTB40-IT1	ENST00000438551.1	sense_intronic	0.365718	0.464644	-1.10375	-0.799747	0.244613	0.416474	0.463467	-0.343915	0.408134	0.850194
ENSG00000070886	EPHA8	ENST00000166244.7,ENST00000374644.8	protein_coding	1.90198e-10	8.46146e-10	6.93657	-0.9516	7.92339e-05	0.000316936	-5.12548e-15	-3.2253	1	1
ENSG00000173372	C1QA	ENST00000438241.1,ENST00000402322.1,ENST00000374642.7	protein_coding	5.8731e-14	3.31229e-13	5.69017	-1.82443	0.0257049	0.0623386	-5.12548e-15	-3.2253	1	1
ENSG00000159189	C1QC	ENST00000374637.1,ENST00000374639.7,ENST00000374640.8	protein_coding	0.80086	0.829111	0	-2.80372	1	1	-5.12548e-15	-3.2253	1	1
ENSG00000173369	C1QB	ENST00000509305.5,ENST00000314933.6,ENST00000510260.5,ENST00000432749.6	protein_coding	0.105825	0.161103	3.8541	-2.46383	0.312854	0.479929	-5.12548e-15	-3.2253	1	1
ENSG00000133216	EPHB2	ENST00000490436.1,ENST00000465676.1,ENST00000374632.7,ENST00000544305.5,ENST00000374627.1,ENST00000400191.7,ENST00000374630.7	processed_transcript,protein_coding	1.78812e-24	1.6785e-23	7.10571	1.04006	1.00294e-17	1.44114e-16	0.81004	-2.76601	1	1
ENSG00000215906	LACTBL1	ENST00000618559.1,ENST00000426928.6	protein_coding	6.38096e-07	2.08976e-06	5.96228	-1.63389	0.00296704	0.00898508	-5.12548e-15	-3.2253	1	1
ENSG00000227868	C1orf234	ENST00000622840.1,ENST00000566855.3,ENST00000440767.2	protein_coding	0.178845	0.24679	1.29957	-1.77766	0.487214	0.713736	-1.80428	-2.52434	0.420257	0.867919
ENSG00000004487	KDM1A	ENST00000465864.1,ENST00000494920.1,ENST00000481879.1,ENST00000602503.1,ENST00000356634.7,ENST00000400181.8	retained_intron,protein_coding	2.7272e-07	9.24867e-07	-1.71929	7.2264	8.50919e-11	6.93566e-10	0.0310688	7.96154	0.84842	1
ENSG00000169641	LUZP1	ENST00000418342.5,ENST00000314174.5,ENST00000475164.2,ENST00000302291.8,ENST00000471849.5	protein_coding	1.3259e-14	7.7951e-14	-1.26771	6.59941	2.43853e-06	1.20813e-05	-0.951793	6.80047	3.7142e-09	3.74817e-08
ENSG00000229010	RP5-979D14.1	ENST00000450968.1	processed_pseudogene	0.60401	0.680069	3.00207	-2.62279	1	1	-5.12548e-15	-3.2253	1	1
ENSG00000179546	HTR1D	ENST00000374619.1	protein_coding	0.0887	0.137247	1.0275	-2.4767	1	1	-2.34002	-3.05523	1	1
ENSG00000215381	RP5-1057J7.1	ENST00000442089.1	processed_pseudogene	0.806156	0.829111	-1.93442	-2.63768	1	1	-2.34002	-3.05523	1	1
ENSG00000261326	LINC01355	ENST00000566551.1,ENST00000604481.1	lincRNA	3.63335e-06	1.10715e-05	-1.41925	3.10403	0.00497087	0.0143849	0.343114	3.87591	0.249469	0.592606
ENSG00000125944	HNRNPR	ENST00000490652.1,ENST00000302271.10,ENST00000374612.5,ENST00000470941.5,ENST00000464516.1,ENST00000478691.5,ENST00000374616.7,ENST00000476451.1,ENST00000476660.1,ENST00000463552.5,ENST00000606561.5,ENST00000427764.3	processed_transcript,protein_coding	8.65656e-11	3.94489e-10	-2.21163	7.35084	2.08301e-13	2.15159e-12	0.35426	8.35788	0.0263429	0.0916672
ENSG00000125945	ZNF436	ENST00000314011.8,ENST00000374608.3	protein_coding	0.00105492	0.00238131	-0.590499	4.293	0.0282888	0.06813	-0.0472987	4.62727	0.872767	1
ENSG00000271420	RP5-1057J7.7	ENST00000605350.1	lincRNA	5.43126e-05	0.000145306	0	-2.80372	1	1	4.36898	-2.52575	0.0973798	0.278005
ENSG00000204219	TCEA3	ENST00000492271.1,ENST00000374601.7,ENST00000476978.1,ENST00000461794.1,ENST00000374602.2,ENST00000450454.6	retained_intron,protein_coding	1.62977e-40	2.47991e-39	8.13596	0.129693	5.59418e-08	3.37444e-07	8.50187	0.40881	1.1351e-10	1.31178e-09
ENSG00000088280	ASAP3	ENST00000465372.5,ENST00000530874.1,ENST00000336689.7,ENST00000449467.2,ENST00000437606.6,ENST00000495646.5,ENST00000618240.4,ENST00000492982.6,ENST00000608765.1,ENST00000484418.1,ENST00000475814.5,ENST00000478858.5	nonsense_mediated_decay,processed_transcript,retained_intron,protein_coding	2.37999e-20	1.8856e-19	6.47289	0.390524	5.88484e-13	5.87199e-12	2.84271	-2.05689	0.117028	0.322975
ENSG00000007968	E2F2	ENST00000361729.2,ENST00000487237.1	processed_transcript,protein_coding	2.77959e-36	3.78336e-35	-2.91099	5.49519	3.62223e-11	3.06562e-10	-0.231079	6.29124	0.30163	0.667401
ENSG00000235052	RP1-150O5.3	ENST00000451217.1	lincRNA	0.654632	0.717848	0	-2.80372	1	1	-5.12548e-15	-3.2253	1	1
ENSG00000117318	ID3	ENST00000486541.1,ENST00000463312.1,ENST00000374561.5	processed_transcript,protein_coding	1.12198e-32	1.3809e-31	4.34686	6.33068	6.71241e-29	1.86456e-27	-0.786816	2.71239	0.395387	0.830808
ENSG00000197880	MDS2	ENST00000477916.5,ENST00000374555.7,ENST00000612756.1	processed_transcript,protein_coding	0.0204842	0.0369313	4.78587	-2.18341	0.120517	0.232546	-5.12548e-15	-3.2253	1	1
ENSG00000229239	RP11-223J15.2	ENST00000451300.2	unprocessed_pseudogene	0.61423	0.680069	2.96192	-2.62475	1	1	-5.12548e-15	-3.2253	1	1
ENSG00000142676	RPL11	ENST00000482370.1,ENST00000458455.1,ENST00000443624.5,ENST00000374550.7,ENST00000467075.1	processed_transcript,protein_coding	0.000790342	0.00181727	1.14489	8.62658	0.00582306	0.0165061	0.939482	8.59376	2.38889e-06	1.76628e-05
ENSG00000011007	ELOA	ENST00000609199.1,ENST00000487554.1,ENST00000613537.4,ENST00000418390.6	processed_transcript,protein_coding	0.404366	0.506664	0.293907	6.28742	0.275181	0.462707	0.239502	6.36439	0.226844	0.547561
ENSG00000057757	PITHD1	ENST00000415372.1,ENST00000246151.8,ENST00000374524.1	protein_coding	0.231023	0.308842	0.589909	6.32867	0.0216093	0.0539137	0.025207	6.12522	0.911966	1
ENSG00000011009	LYPLA2	ENST00000374501.1,ENST00000421070.1,ENST00000374502.7,ENST00000472213.1,ENST00000420982.5,ENST00000374503.7,ENST00000374514.7,ENST00000495365.5,ENST00000374505.6,ENST00000492577.1	processed_transcript,protein_coding	0.0641751	0.102516	-0.832417	5.09867	0.00169976	0.00542514	0.00193757	5.55247	0.995258	1
ENSG00000117308	GALE	ENST00000467070.1,ENST00000486382.1,ENST00000470383.1,ENST00000469556.1,ENST00000445705.1,ENST00000425913.5,ENST00000470949.5,ENST00000429356.5,ENST00000374497.7,ENST00000459934.5,ENST00000418277.5,ENST00000466250.5,ENST00000481736.5,ENST00000456977.5,ENST00000467493.5,ENST00000617979.4	processed_transcript,protein_coding	2.18999e-94	8.13935e-93	4.49773	7.60471	4.08677e-33	1.4184e-31	0.253045	4.29526	0.302004	0.668104
ENSG00000117305	HMGCL	ENST00000498698.1,ENST00000235958.4,ENST00000374490.7,ENST00000513148.1,ENST00000496907.1,ENST00000479458.1,ENST00000436439.6,ENST00000509389.5,ENST00000374487.6	nonsense_mediated_decay,processed_transcript,retained_intron,protein_coding	1.15336e-05	3.33401e-05	-1.36539	4.58624	5.52587e-07	2.9724e-06	-0.75947	4.86751	3.1996e-05	0.000202106
ENSG00000179163	FUCA1	ENST00000374479.3	protein_coding	5.27058e-52	1.02341e-50	3.67684	5.50772	8.99199e-21	1.60035e-19	2.31244	4.42812	1.16014e-26	3.33554e-25
ENSG00000188822	CNR2	ENST00000374472.4	protein_coding	4.81014e-44	7.94655e-43	-3.19426	3.01283	4.14899e-14	4.54061e-13	1.63949	4.90792	2.07136e-13	2.96571e-12
ENSG00000229106	BTBD6P1	ENST00000412176.1	processed_pseudogene	5.09176e-53	1.00765e-51	0.406987	1.05569	0.482536	0.707823	2.17968	2.38948	8.88134e-11	1.03309e-09
ENSG00000230228	RP11-4M23.4	ENST00000421430.2	processed_pseudogene	0.129903	0.193859	4.39582	-2.31757	0.190109	0.331684	-5.12548e-15	-3.2253	1	1
ENSG00000189266	PNRC2	ENST00000374468.1,ENST00000471915.5,ENST00000579103.1,ENST00000334351.7	protein_coding	0.0826604	0.12883	-0.64807	7.46179	0.0412227	0.0943379	0.351876	8.0406	0.0256554	0.0894599
ENSG00000188529	SRSF10	ENST00000338597.9,ENST00000374453.7,ENST00000469303.1,ENST00000374452.9,ENST00000341154.10,ENST00000473858.5,ENST00000497214.1,ENST00000484146.6,ENST00000485292.1,ENST00000492112.2,ENST00000495785.1,ENST00000343255.9,ENST00000473754.1,ENST00000453840.7,ENST00000344989.10,ENST00000485841.5	nonsense_mediated_decay,processed_transcript,retained_intron,protein_coding	0.0211982	0.0381177	-0.979887	7.68798	0.000757838	0.00256623	0.287918	8.35135	0.0599906	0.18555
ENSG00000215905	RP11-4M23.7	ENST00000442164.2	processed_pseudogene	0.00620255	0.0124206	4.8965	-2.17547	0.0791691	0.163057	-5.12548e-15	-3.2253	1	1
ENSG00000142661	MYOM3	ENST00000338909.9,ENST00000374434.3,ENST00000475306.1,ENST00000448831.1	processed_transcript,protein_coding	1.03665e-11	5.04758e-11	7.06747	-0.833645	0.000118149	0.000459779	-5.12548e-15	-3.2253	1	1
ENSG00000142677	IL22RA1	ENST00000270800.1	protein_coding	0.0485557	0.079567	4.45737	-2.31361	0.190109	0.331684	-5.12548e-15	-3.2253	1	1
ENSG00000185436	IFNLR1	ENST00000327535.5,ENST00000327575.6,ENST00000374421.7,ENST00000374418.3,ENST00000374419.1	protein_coding	0.0148903	0.0275522	4.81342	-2.18143	0.0791691	0.163057	-5.12548e-15	-3.2253	1	1
ENSG00000230023	RP11-10N16.2	ENST00000439059.2	lincRNA	0.61423	0.680069	2.96192	-2.62475	1	1	-5.12548e-15	-3.2253	1	1
ENSG00000158055	GRHL3	ENST00000528181.1,ENST00000236255.4,ENST00000530984.1,ENST00000461318.1,ENST00000350501.9,ENST00000528064.5,ENST00000361548.8,ENST00000356046.6,ENST00000524724.5	nonsense_mediated_decay,processed_transcript,retained_intron,protein_coding	1.87605e-08	7.06778e-08	6.33411	-1.37849	0.00318401	0.00957238	-5.12548e-15	-3.2253	1	1
ENSG00000001460	STPG1	ENST00000374409.5,ENST00000438866.1,ENST00000003583.12,ENST00000435187.1,ENST00000483261.1,ENST00000483528.1,ENST00000337248.8,ENST00000475760.1,ENST00000497384.1,ENST00000498488.5,ENST00000468303.5,ENST00000492753.1	processed_transcript,protein_coding	2.63545e-12	1.33992e-11	-0.0331121	1.60637	0.964164	1	1.41511	2.56032	0.000218595	0.00120583
ENSG00000001461	NIPAL3	ENST00000475663.2,ENST00000003912.7,ENST00000339255.2,ENST00000358028.8,ENST00000432012.1,ENST00000488155.1,ENST00000374399.8	processed_transcript,protein_coding	5.61685e-18	3.97565e-17	-2.3964	4.30722	1.50707e-15	1.83579e-14	0.748522	5.5464	0.00456465	0.019352
ENSG00000117602	RCAN3	ENST00000610732.4,ENST00000618490.4,ENST00000436717.6,ENST00000482807.1,ENST00000374393.4,ENST00000374395.8,ENST00000412742.5,ENST00000630217.1,ENST00000425530.3,ENST00000538532.5,ENST00000616511.4	nonsense_mediated_decay,protein_coding	2.01982e-127	1.12603e-125	4.33976	0.568611	1.67221e-10	1.32321e-09	6.88221	3.35262	7.45698e-60	5.33833e-58
ENSG00000264443	RP4-594I10.3	ENST00000577528.1	lincRNA	0.00722096	0.0142075	4.84104	-2.17945	0.0791691	0.163057	-5.12548e-15	-3.2253	1	1
ENSG00000184454	NCMAP	ENST00000374392.2,ENST00000486262.1	processed_transcript,protein_coding	0.451362	0.552695	3.00207	-2.62279	1	1	-5.12548e-15	-3.2253	1	1
ENSG00000133226	SRRM1	ENST00000470243.5,ENST00000471693.1,ENST00000468822.5,ENST00000485441.5,ENST00000323848.13,ENST00000478890.5,ENST00000600523.5,ENST00000496882.5,ENST00000485541.1,ENST00000490543.5,ENST00000593639.5,ENST00000374389.8,ENST00000489130.2,ENST00000461768.5,ENST00000488317.1,ENST00000474843.1,ENST00000479034.5,ENST00000466910.5,ENST00000447431.6,ENST00000494934.5,ENST00000596378.1,ENST00000495561.1,EN…	nonsense_mediated_decay,processed_transcript,retained_intron,protein_coding	0.000508805	0.00120347	-1.47116	7.33135	6.56398e-05	0.000266254	0.0744479	8.02722	0.644014	1
ENSG00000169504	CLIC4	ENST00000489758.1,ENST00000374379.8,ENST00000497755.1,ENST00000488683.1	nonsense_mediated_decay,processed_transcript,protein_coding	1.57351e-08	5.97228e-08	-1.08234	7.09582	6.12551e-05	0.000249358	-1.10177	7.19184	2.66248e-06	1.95546e-05
ENSG00000020633	RUNX3	ENST00000308873.10,ENST00000399916.5,ENST00000479341.1,ENST00000338888.3,ENST00000496967.1	processed_transcript,protein_coding	3.99228e-20	3.1312e-19	-1.04129	6.30124	0.000458492	0.00161548	-2.33336	6.09088	1.08837e-25	3.01541e-24
ENSG00000261025	RP11-84D1.2	ENST00000568143.1	lincRNA	0.00132882	0.00294986	5.19346	-2.05149	0.0585427	0.128586	-5.12548e-15	-3.2253	1	1
ENSG00000233755	RP4-799D16.1	ENST00000429666.1,ENST00000424084.1	lincRNA	0.647563	0.711901	0	-2.80372	1	1	-5.12548e-15	-3.2253	1	1
ENSG00000117614	SYF2	ENST00000354361.3,ENST00000474160.1,ENST00000236273.8,ENST00000476231.1	processed_transcript,protein_coding	0.834873	0.844933	-0.10951	4.39942	0.800403	1	0.0412695	4.57276	0.883765	1
ENSG00000117616	RSRP1	ENST00000567741.1,ENST00000568212.1,ENST00000473314.6,ENST00000562018.1,ENST00000564223.5,ENST00000561867.1,ENST00000565733.5,ENST00000568701.1,ENST00000568996.1,ENST00000475766.2,ENST00000566395.5,ENST00000498238.1,ENST00000243189.11,ENST00000431849.3,ENST00000491378.1,ENST00000566599.1,ENST00000569495.5,ENST00000450820.2,ENST00000568254.5,ENST00000564413.1,ENST00000568399.1,ENST00000570063.5	nonsense_mediated_decay,processed_transcript,retained_intron,protein_coding	2.35946e-34	3.03589e-33	2.8998	8.57627	1.01744e-24	2.27044e-23	0.170631	6.69212	0.522396	0.98114
ENSG00000272432	RP3-465N24.6	ENST00000607698.1	lincRNA	2.73377e-15	1.67235e-14	3.83944	0.329437	5.9195e-09	3.98872e-08	-0.258167	-1.83296	1	1
ENSG00000261349	RP3-465N24.5	ENST00000566714.1	unprocessed_pseudogene	0.000757639	0.00174987	-0.0218249	0.030357	1	1	0.214167	0.182821	0.790487	1
ENSG00000187010	RHD	ENST00000568195.5,ENST00000342055.9,ENST00000328664.8,ENST00000564398.5,ENST00000357542.8,ENST00000622561.4,ENST00000423810.6,ENST00000454452.6,ENST00000423253.1,ENST00000417538.6	processed_transcript,retained_intron,protein_coding	0.335976	0.432697	4.39582	-2.31757	0.190109	0.331684	-5.12548e-15	-3.2253	1	1
ENSG00000224183	SDHDP6	ENST00000414693.1	processed_pseudogene	0.010572	0.02005	-2.15516	-1.4462	0.196934	0.34255	-1.5738	-1.6395	0.231427	0.556566
ENSG00000259984	RP11-335G20.7	ENST00000570165.1	unprocessed_pseudogene	0.220895	0.296914	1.15509	-1.98233	0.752816	1	2.65903	-1.22847	0.0609538	0.188256
ENSG00000183726	TMEM50A	ENST00000491936.5,ENST00000480937.5,ENST00000498135.5,ENST00000374358.4,ENST00000487234.1,ENST00000468704.1	processed_transcript,protein_coding	0.0741782	0.116966	-0.802368	5.79672	0.00447617	0.0131058	-0.0568214	6.21313	0.767607	1
ENSG00000188672	RHCE	ENST00000495048.1,ENST00000533771.1,ENST00000349320.7,ENST00000413854.5,ENST00000527747.5,ENST00000527187.5,ENST00000340849.8,ENST00000346452.8,ENST00000349438.8,ENST00000294413.11	nonsense_mediated_decay,processed_transcript,retained_intron,protein_coding	1.83911e-20	1.46616e-19	3.79333	1.55163	1.05764e-10	8.5574e-10	-2.4513	-1.41616	0.00718543	0.0290659
ENSG00000238084	RP3-469D22.1	ENST00000419297.2	processed_pseudogene	0.255142	0.337923	-1.93121	-2.63801	1	1	0.808291	-2.76612	1	1
ENSG00000204178	TMEM57	ENST00000470035.1,ENST00000374343.4,ENST00000399766.7	processed_transcript,protein_coding	0.282767	0.370205	-0.192439	5.63413	0.467488	0.688432	-0.165268	5.74987	0.389815	0.821527
ENSG00000157978	LDLRAP1	ENST00000485476.2,ENST00000374338.4,ENST00000484476.5,ENST00000462394.1,ENST00000470950.1,ENST00000474283.1,ENST00000488127.1	processed_transcript,protein_coding	6.8024e-09	2.67088e-08	-1.90064	4.28005	7.85501e-11	6.42372e-10	0.021892	5.02011	0.945042	1
ENSG00000225643	RP11-70P17.1	ENST00000412797.1	lincRNA	0.0270995	0.0478287	1.54078	-1.51482	0.339592	0.516637	-1.26561	-2.31812	0.541717	1
ENSG00000117643	MAN1C1	ENST00000475314.5,ENST00000496532.5,ENST00000487493.1,ENST00000374332.8,ENST00000473891.1,ENST00000611903.4,ENST00000374329.1,ENST00000263979.7	processed_transcript,protein_coding	2.21038e-09	9.02657e-09	2.32767	4.99052	3.35891e-09	2.32099e-08	0.941575	4.07834	4.9709e-05	0.000305784
ENSG00000162430	SELENON	ENST00000374315.1,ENST00000354177.8,ENST00000494537.1,ENST00000361547.6,ENST00000630065.2	processed_transcript,protein_coding	5.20763e-14	2.94632e-13	-1.3911	4.91777	1.33143e-06	6.82238e-06	1.02293	6.13812	1.18092e-07	1.01804e-06
ENSG00000117640	MTFR1L	ENST00000464008.6,ENST00000533762.5,ENST00000528624.5,ENST00000469815.5,ENST00000494293.1,ENST00000374307.9,ENST00000474295.5,ENST00000525713.5,ENST00000497956.1,ENST00000374300.7,ENST00000488327.6,ENST00000374303.6,ENST00000466284.1,ENST00000526894.5,ENST00000478284.5,ENST00000472643.5,ENST00000526158.5,ENST00000424294.5,ENST00000531361.1,ENST00000374301.7,ENST00000529116.5,ENST00000524618.5,ENS…	nonsense_mediated_decay,processed_transcript,retained_intron,protein_coding	3.05014e-06	9.36615e-06	-0.410965	4.57679	0.170482	0.317378	0.460475	5.11275	0.00913934	0.0359949
ENSG00000127423	AUNIP	ENST00000374298.3,ENST00000538789.5,ENST00000481602.1	processed_transcript,protein_coding	5.9318e-26	5.86218e-25	-3.35195	4.6529	8.24792e-27	2.07169e-25	-1.0397	5.16107	6.15559e-09	6.06836e-08
ENSG00000182749	PAQR7	ENST00000374296.3	protein_coding	0.0862537	0.13385	-0.575834	-0.222912	0.532127	0.771617	-0.51602	-0.246855	0.428639	0.880841
ENSG00000117632	STMN1	ENST00000455785.6,ENST00000446334.1,ENST00000399728.5,ENST00000374291.5,ENST00000513116.1,ENST00000357865.6,ENST00000426559.6,ENST00000465604.1,ENST00000485226.1	processed_transcript,protein_coding	0.000145581	0.000368238	-1.33598	8.51483	5.62745e-07	3.02348e-06	0.0233605	9.14958	0.924521	1
ENSG00000158006	PAFAH2	ENST00000439092.6,ENST00000374284.5,ENST00000374282.7,ENST00000464540.1,ENST00000441420.1,ENST00000476611.1,ENST00000493892.5	processed_transcript,protein_coding	7.32692e-06	2.16853e-05	-1.9231	3.12587	1.19853e-08	7.80326e-08	-0.0173154	3.81653	0.948773	1
ENSG00000158008	EXTL1	ENST00000470037.1,ENST00000481377.5,ENST00000484339.1,ENST00000374280.3	processed_transcript,protein_coding	5.78275e-11	2.67526e-10	3.66604	0.337088	2.12704e-06	1.06302e-05	-0.4459	-1.7658	0.827533	1
ENSG00000158014	SLC30A2	ENST00000498060.1,ENST00000374278.7,ENST00000374276.3	processed_transcript,protein_coding	0.000112462	0.000288527	5.78209	-1.73129	0.00960615	0.0259867	-5.12548e-15	-3.2253	1	1
ENSG00000158022	TRIM63	ENST00000483052.1,ENST00000374272.3	processed_transcript,protein_coding	0.561232	0.662832	-1.93121	-2.63801	1	1	-2.34027	-3.05521	1	1
ENSG00000175087	PDIK1L	ENST00000619836.4,ENST00000374269.1,ENST00000374271.8,ENST00000444713.5	protein_coding	9.92521e-09	3.84605e-08	-2.52971	4.35346	1.49949e-17	2.12977e-16	-0.212139	5.08874	0.273658	0.635084
ENSG00000197245	FAM110D	ENST00000374268.4	protein_coding	3.05761e-06	9.38816e-06	2.94011	-0.396511	6.19557e-05	0.000251916	0.456517	-1.58171	0.678672	1
ENSG00000282872	RP11-96L14.8	ENST00000634842.1,ENST00000635463.1	protein_coding	0.000956247	0.00216928	5.92495	-1.71919	0.0615334	0.13427	-5.12548e-15	-3.2253	1	1
ENSG00000236782	RP11-96L14.7	ENST00000433939.6,ENST00000414762.1,ENST00000407889.6,ENST00000444682.1,ENST00000448923.2	nonsense_mediated_decay,processed_transcript,protein_coding	9.5156e-14	5.30209e-13	7.61194	-0.401272	6.66423e-08	3.98013e-07	5.02206	-2.22652	0.0135464	0.0510825
ENSG00000142684	ZNF593	ENST00000270812.6,ENST00000374266.6	protein_coding	2.05157e-09	8.39301e-09	1.36552	4.7036	3.41501e-05	0.000144341	0.78855	4.43502	0.00795717	0.0318367
ENSG00000142675	CNKSR1	ENST00000524529.6,ENST00000528001.1,ENST00000465415.1,ENST00000484874.2,ENST00000531191.5,ENST00000361530.10,ENST00000525687.5,ENST00000480348.6,ENST00000481077.6,ENST00000482227.5,ENST00000374253.9,ENST00000480617.1,ENST00000531150.5,ENST00000528281.5	nonsense_mediated_decay,processed_transcript,retained_intron,protein_coding	0.0116821	0.0219951	-0.150184	0.862056	0.801895	1	0.184757	1.07745	0.638747	1
ENSG00000188782	CATSPER4	ENST00000518899.5,ENST00000456354.6,ENST00000338855.6	nonsense_mediated_decay,protein_coding	8.48763e-07	2.75098e-06	6.14681	-1.53757	0.00210619	0.00658695	-5.12548e-15	-3.2253	1	1
ENSG00000236155	RP11-231P20.2	ENST00000447201.5,ENST00000451482.1,ENST00000448341.2,ENST00000428812.1	transcribed_unprocessed_pseudogene,processed_transcript	0.450465	0.552424	2.96192	-2.62475	1	1	-5.12548e-15	-3.2253	1	1
ENSG00000278572	RP11-231P20.6	ENST00000622820.1	unprocessed_pseudogene	0.106773	0.162416	1.65361	-2.08531	0.519326	0.755967	-3.19038	-2.90305	0.52202	0.980779
ENSG00000130695	CEP85	ENST00000476272.6,ENST00000491670.1,ENST00000640292.1,ENST00000468163.1,ENST00000469609.5,ENST00000453146.1,ENST00000480446.1,ENST00000451429.6,ENST00000252992.8	nonsense_mediated_decay,processed_transcript,protein_coding	9.86832e-08	3.48512e-07	-1.55271	6.01599	7.27012e-09	4.83466e-08	-0.0411532	6.66954	0.816023	1
ENSG00000142669	SH3BGRL3	ENST00000270792.9,ENST00000319041.6	protein_coding	0.00174107	0.00379189	-1.02829	5.49452	0.000978201	0.00325491	-0.399459	5.82751	0.124771	0.341283
ENSG00000158062	UBXN11	ENST00000421827.2,ENST00000357089.8,ENST00000496466.1,ENST00000442942.6,ENST00000374222.5,ENST00000472155.5,ENST00000423664.5,ENST00000452980.5,ENST00000494942.5,ENST00000374223.5,ENST00000314675.11,ENST00000450041.5,ENST00000374217.6,ENST00000475591.5,ENST00000374221.7,ENST00000374215.5	retained_intron,protein_coding	2.66387e-14	1.53814e-13	1.30586	5.27933	2.1504e-05	9.3483e-05	0.581084	4.92194	0.00765685	0.0307203
ENSG00000169442	CD52	ENST00000470468.1,ENST00000492808.5,ENST00000374213.2	processed_transcript,protein_coding	1.65149e-72	4.49767e-71	-9.7605	4.97362	1.55669e-61	2.22384e-59	-9.19875	5.04565	1.09074e-119	2.09005e-117
ENSG00000176092	AIM1L	ENST00000522923.5,ENST00000522993.1,ENST00000640960.1,ENST00000308182.9,ENST00000374207.4,ENST00000527815.5,ENST00000374211.5,ENST00000429942.2,ENST00000475866.2,ENST00000374208.1,ENST00000520372.5	nonsense_mediated_decay,processed_transcript,retained_intron,protein_coding	0.000696256	0.00161521	2.99357	-0.993838	0.00564196	0.0160854	-4.10847	-2.63979	0.158698	0.408127
ENSG00000225854	RP11-569G9.7	ENST00000434718.2	processed_pseudogene	0.704444	0.760687	-1.93121	-2.63801	1	1	-2.34027	-3.05521	1	1
ENSG00000176083	ZNF683	ENST00000416125.1,ENST00000403843.5,ENST00000451801.5,ENST00000436292.5,ENST00000455900.5,ENST00000454975.1,ENST00000453132.5,ENST00000349618.7,ENST00000423508.5	protein_coding	4.94598e-22	4.22395e-21	-4.20798	-0.0269797	0.000257798	0.000950516	-7.70172	-0.337048	1.30852e-08	1.2477e-07
ENSG00000131914	LIN28A	ENST00000326279.10,ENST00000254231.4	protein_coding	0.00722096	0.0142075	4.84104	-2.17945	0.0791691	0.163057	-5.12548e-15	-3.2253	1	1
ENSG00000117682	DHDDS	ENST00000236342.11,ENST00000374186.7,ENST00000416052.1,ENST00000431933.5,ENST00000526278.5,ENST00000427245.6,ENST00000530781.5,ENST00000525682.6,ENST00000360009.6,ENST00000525410.1,ENST00000531955.5,ENST00000374185.7,ENST00000487944.5,ENST00000528557.5,ENST00000434391.6,ENST00000533087.5,ENST00000531312.5,ENST00000529688.5,ENST00000526219.5,ENST00000525165.5,ENST00000436153.6,ENST00000527611.1,EN…	nonsense_mediated_decay,processed_transcript,retained_intron,protein_coding	5.81882e-10	2.49835e-09	1.76033	6.03458	2.69351e-09	1.87946e-08	0.491951	5.28407	0.0195072	0.070455
ENSG00000223583	RP3-476K8.4	ENST00000446498.1	processed_pseudogene	0.890027	0.897488	-0.650632	-2.11053	1	1	0.506797	-2.05597	0.852177	1
ENSG00000198830	HMGN2	ENST00000493418.1,ENST00000467700.5,ENST00000619352.4,ENST00000468388.5,ENST00000460563.5,ENST00000464888.5,ENST00000479815.5,ENST00000463817.5,ENST00000361427.5,ENST00000466194.1	processed_transcript,protein_coding	3.4327e-05	9.4095e-05	-1.80906	8.31521	3.78733e-11	3.20112e-10	-0.176482	8.97096	0.576408	1
ENSG00000224129	DPPA2P2	ENST00000418220.1	processed_pseudogene	0.770289	0.817364	0	-2.80372	1	1	-5.12548e-15	-3.2253	1	1
ENSG00000117676	RPS6KA1	ENST00000525525.5,ENST00000530607.1,ENST00000526040.6,ENST00000531382.5,ENST00000374166.8,ENST00000527264.5,ENST00000525582.1,ENST00000474934.1,ENST00000531113.5,ENST00000529454.5,ENST00000524436.5,ENST00000488985.1,ENST00000366866.8,ENST00000403732.2,ENST00000526792.5,ENST00000530305.1,ENST00000374168.6,ENST00000438977.1,ENST00000530003.5,ENST00000374163.5	nonsense_mediated_decay,processed_transcript,retained_intron,protein_coding	8.64931e-23	7.61425e-22	-1.21426	6.58689	9.44021e-05	0.000372763	1.2242	7.90905	7.35057e-12	9.33406e-11
ENSG00000117713	ARID1A	ENST00000466382.2,ENST00000636110.1,ENST00000636958.1,ENST00000615191.4,ENST00000636422.1,ENST00000324856.11,ENST00000636794.1,ENST00000532781.1,ENST00000524572.1,ENST00000637788.1,ENST00000374152.7,ENST00000636219.1,ENST00000430799.7,ENST00000636072.1,ENST00000637465.1,ENST00000457599.6,ENST00000430291.2	nonsense_mediated_decay,processed_transcript,retained_intron,protein_coding	0.00146671	0.00322998	-0.662324	8.00507	0.0436954	0.0994844	0.309506	8.56634	0.0615097	0.189717
ENSG00000060642	PIGV	ENST00000455364.1,ENST00000078527.8,ENST00000430292.5,ENST00000374145.5,ENST00000431541.5,ENST00000472757.5	nonsense_mediated_decay,protein_coding	0.220356	0.296253	-0.500086	4.02263	0.0704113	0.151232	-0.334857	4.18511	0.10758	0.301319
ENSG00000204160	ZDHHC18	ENST00000534643.5,ENST00000374141.6,ENST00000488397.3,ENST00000478902.1,ENST00000374142.8	processed_transcript,protein_coding	0.00278902	0.00590541	-1.32479	4.82983	0.000126388	0.000488989	-0.460102	5.22071	0.0123326	0.0470431
ENSG00000175793	SFN	ENST00000339276.5	protein_coding	0.19853	0.27035	0	-2.80372	1	1	2.30487	-3.05545	1	1
ENSG00000142751	GPN2	ENST00000431781.2,ENST00000461282.1,ENST00000477418.2,ENST00000374135.8,ENST00000374133.3	processed_transcript,retained_intron,protein_coding	0.00013446	0.000342109	1.1921	6.13372	8.93343e-06	4.09849e-05	0.174572	5.62021	0.291885	0.649173
ENSG00000198746	GPATCH3	ENST00000445019.5,ENST00000450844.1,ENST00000361720.9	protein_coding	0.0999871	0.153083	0.806291	4.34666	0.00805818	0.0222646	0.277431	4.1515	0.200863	0.495117
ENSG00000090273	NUDC	ENST00000484772.1,ENST00000452707.1,ENST00000321265.9,ENST00000435827.6	processed_transcript,protein_coding	0.0276246	0.0486885	0.105069	6.10252	0.695954	0.960019	0.44548	6.39392	0.0923535	0.266268
ENSG00000131910	NR0B2	ENST00000254227.3	protein_coding	0.167214	0.238398	3.88882	-2.46187	0.312854	0.479929	-5.12548e-15	-3.2253	1	1
ENSG00000175707	KDF1	ENST00000320567.5,ENST00000616918.1	protein_coding	0.0817051	0.127507	4.8965	-2.17547	0.0791691	0.163057	2.30325	-3.05558	1	1
ENSG00000172746	RPL12P13	ENST00000310055.5	unprocessed_pseudogene	0.492155	0.590556	3.00207	-2.62279	1	1	2.30325	-3.05558	1	1
ENSG00000225294	OSTCP2	ENST00000437956.1	processed_pseudogene	0.245698	0.326577	0.271748	-2.34146	1	1	0.492476	-2.5248	1	1
ENSG00000253368	TRNP1	ENST00000531285.1,ENST00000522111.2	protein_coding	8.79234e-164	7.42361e-162	5.77083	6.08151	2.30304e-41	1.2042e-39	-2.10844	0.781108	2.93284e-06	2.13686e-05
ENSG00000158246	FAM46B	ENST00000289166.5	protein_coding	1.9024e-199	2.55785e-197	13.2648	5.44173	5.60206e-68	1.07991e-65	6.58234	-1.22751	0.000520508	0.00270306
ENSG00000090020	SLC9A1	ENST00000447808.1,ENST00000263980.7,ENST00000374089.5,ENST00000490329.1,ENST00000374084.2,ENST00000374086.3	processed_transcript,retained_intron,protein_coding	2.63318e-104	1.11163e-102	4.16631	8.18468	2.02156e-37	8.6949e-36	-0.379142	4.87684	0.106806	0.299438
ENSG00000229985	RP11-40H20.5	ENST00000457038.1	processed_pseudogene	0.160252	0.2309	3.9239	-2.4599	0.312854	0.479929	-5.12548e-15	-3.2253	1	1
ENSG00000214973	CHCHD3P3	ENST00000446783.1	processed_pseudogene	0.279191	0.366152	3.88882	-2.46187	0.312854	0.479929	3.6819	-2.7661	0.283029	0.635084
ENSG00000225159	NPM1P39	ENST00000449818.1	processed_pseudogene	0.306705	0.398302	-0.54924	-0.868825	0.591275	0.840289	0.684282	-0.419321	0.196889	0.487009
ENSG00000142784	WDTC1	ENST00000491239.2,ENST00000447062.2,ENST00000361771.7,ENST00000319394.7,ENST00000472249.2	nonsense_mediated_decay,retained_intron,protein_coding	0.0111451	0.0210463	-0.995941	6.08878	0.000339827	0.00122557	-0.380571	6.42425	0.0512164	0.162399
ENSG00000243659	RP11-4K3__A.3	ENST00000428741.2	processed_pseudogene	0.0577206	0.0930884	-5.43566	-1.33305	0.00579027	0.016419	0.125	-0.904462	0.95143	1
ENSG00000186501	TMEM222	ENST00000464813.5,ENST00000464720.5,ENST00000471456.1,ENST00000486082.5,ENST00000498220.1,ENST00000608611.5,ENST00000470223.1,ENST00000466759.5,ENST00000611517.4,ENST00000374076.8,ENST00000478104.5	nonsense_mediated_decay,retained_intron,protein_coding	0.95418	0.957711	-0.333861	4.82346	0.245931	0.418518	-0.166399	4.99989	0.432303	0.886434
ENSG00000241547	ACTG1P20	ENST00000486001.1	processed_pseudogene	7.35028e-05	0.000193667	2.02393	1.66649	2.39927e-06	1.19015e-05	0.0612901	0.632459	0.945402	1
ENSG00000142765	SYTL1	ENST00000616558.4,ENST00000318074.9,ENST00000496001.5,ENST00000473280.1,ENST00000543823.1,ENST00000483926.5,ENST00000475199.1,ENST00000485269.1,ENST00000490170.5,ENST00000615284.1,ENST00000618673.4	retained_intron,protein_coding	0.000205339	0.000511349	-2.09507	4.61102	4.81629e-07	2.60516e-06	-1.03326	4.95901	0.0597251	0.184872
ENSG00000142733	MAP3K6	ENST00000357582.2,ENST00000470890.1,ENST00000476509.1,ENST00000486046.5,ENST00000493901.5,ENST00000495230.1,ENST00000472410.5,ENST00000374040.7	retained_intron,protein_coding	1.82762e-14	1.06509e-13	1.52848	0.588335	0.0032289	0.00969459	0.66908	0.264947	0.179985	0.452258
ENSG00000142748	FCN3	ENST00000270879.8,ENST00000498393.1,ENST00000354982.2,ENST00000481748.1	retained_intron,protein_coding	0.465725	0.565715	2.96192	-2.62475	1	1	2.30487	-3.05545	1	1
ENSG00000174950	CD164L2	ENST00000374027.7,ENST00000374025.4,ENST00000374030.2	retained_intron,protein_coding	0.00669673	0.0132946	4.86874	-2.17746	0.0791691	0.163057	-5.12548e-15	-3.2253	1	1
ENSG00000181773	GPR3	ENST00000374024.3	protein_coding	3.93598e-17	2.68267e-16	2.86013	0.878627	7.24822e-08	4.30881e-07	0.988215	-0.181889	0.232089	0.557823
ENSG00000158195	WASF2	ENST00000618852.4,ENST00000536657.1	protein_coding	0.0024189	0.00517134	-1.04855	7.7567	7.1366e-05	0.000287196	-0.0911597	8.24662	0.586789	1
ENSG00000126705	AHDC1	ENST00000490295.1,ENST00000480033.2,ENST00000487743.2,ENST00000247087.9,ENST00000374011.6	processed_transcript,protein_coding	2.18266e-25	2.11716e-24	-1.82396	5.6006	1.47851e-09	1.05963e-08	-1.9068	5.67468	7.06544e-23	1.72591e-21
ENSG00000000938	FGR	ENST00000475472.5,ENST00000374004.5,ENST00000374005.7,ENST00000457296.5,ENST00000468038.1,ENST00000399173.5,ENST00000374003.7	processed_transcript,protein_coding	6.08611e-35	7.97852e-34	1.26343	0.204179	0.0722214	0.154826	0.0574282	-0.272067	1	1
ENSG00000235912	RP1-159A19.3	ENST00000433132.1	processed_pseudogene	0.201846	0.274145	0	-2.80372	1	1	-5.12548e-15	-3.2253	1	1
ENSG00000233975	RP11-288L9.1	ENST00000440492.1	lincRNA	0.481328	0.581182	-1.93442	-2.63768	1	1	-2.34002	-3.05523	1	1
ENSG00000126709	IFI6	ENST00000362020.4,ENST00000339145.8,ENST00000361157.10	protein_coding	2.34459e-12	1.19615e-11	0.876043	3.26592	0.0103938	0.0278794	-1.90996	2.24305	1.7518e-08	1.64778e-07
ENSG00000226662	CHMP1AP1	ENST00000445563.2	processed_pseudogene	0.80086	0.829111	0	-2.80372	1	1	-5.12548e-15	-3.2253	1	1
ENSG00000009780	FAM76A	ENST00000446647.1,ENST00000419687.6,ENST00000010299.10,ENST00000373949.5,ENST00000373954.10,ENST00000530324.5,ENST00000234549.11	protein_coding	0.990769	0.991544	0.142955	3.49462	0.672018	0.941201	0.125241	3.58854	0.677371	1
ENSG00000231344	RP3-426I6.2	ENST00000446554.1	processed_pseudogene	0.464206	0.564062	-1.93686	-1.58304	0.492325	0.720629	-0.758385	-1.63997	0.729255	1
ENSG00000230833	RPEP3	ENST00000425462.1	processed_pseudogene	0.0284194	0.0499846	-3.62178	-2.23383	0.312854	0.479929	0.725827	-1.97797	0.680224	1
ENSG00000117758	STX12	ENST00000440806.2,ENST00000481874.1,ENST00000472285.1,ENST00000468761.1,ENST00000373943.8	processed_transcript,protein_coding	0.00772952	0.0151337	1.00917	5.42957	0.000800248	0.00269785	0.672536	5.32781	0.00365661	0.0159156
ENSG00000269971	RP3-426I6.5	ENST00000602607.1	sense_intronic	1.60474e-39	2.36317e-38	5.56275	2.54518	1.59508e-23	3.33175e-22	1.19544	-0.834969	0.15336	0.405213
ENSG00000270031	RP3-426I6.6	ENST00000602843.1	sense_intronic	0.480314	0.580111	1.22054	-0.952198	0.328841	0.501808	0.208785	-1.31889	0.910411	1
ENSG00000117751	PPP1R8	ENST00000311772.9,ENST00000486634.2,ENST00000373931.8,ENST00000236412.11,ENST00000431586.1	processed_transcript,protein_coding	0.00276343	0.00585628	-1.17787	5.8511	7.89021e-06	3.64918e-05	-0.101418	6.37105	0.588912	1
ENSG00000130775	THEMIS2	ENST00000482828.1,ENST00000328928.11,ENST00000467258.1,ENST00000373925.5,ENST00000373921.7,ENST00000466068.1,ENST00000442118.5,ENST00000456990.1,ENST00000427466.1,ENST00000492877.1,ENST00000373927.7	processed_transcript,protein_coding	4.04735e-22	3.46946e-21	-2.56652	3.15729	1.75435e-13	1.82507e-12	-0.280115	3.82452	0.267181	0.625619
ENSG00000117748	RPA2	ENST00000444045.1,ENST00000419958.5,ENST00000373909.7,ENST00000313433.11,ENST00000373912.7	protein_coding	9.60839e-11	4.36621e-10	-1.92775	6.0009	2.13973e-12	2.0336e-11	0.0494647	6.7849	0.788688	1
ENSG00000130768	SMPDL3B	ENST00000373888.8,ENST00000549094.1,ENST00000548116.5,ENST00000466793.1,ENST00000411604.5,ENST00000373894.7	nonsense_mediated_decay,processed_transcript,protein_coding	1.70773e-72	4.64292e-71	-5.00357	3.17199	9.15487e-27	2.28693e-25	-5.02899	3.17801	1.82597e-43	8.66927e-42
ENSG00000158156	XKR8	ENST00000481387.1,ENST00000373884.5	processed_transcript,protein_coding	4.99185e-30	5.6445e-29	-4.27405	3.06364	1.08553e-19	1.79334e-18	-2.78014	3.18945	8.66953e-21	1.91857e-19
ENSG00000158161	EYA3	ENST00000373864.5,ENST00000436342.6,ENST00000495923.5,ENST00000468665.1,ENST00000471498.5,ENST00000373871.7,ENST00000540618.5,ENST00000373863.3	processed_transcript,protein_coding	0.0108292	0.0204928	-0.87175	6.51644	0.0113278	0.0301547	-0.0438939	6.9683	0.781224	1
ENSG00000238231	RP11-460I13.6	ENST00000426041.2	processed_pseudogene	0.0467397	0.0768864	-5.43752	-1.33253	0.00958982	0.0259867	0.791221	-0.583236	0.247523	0.588717
ENSG00000228589	SPCS2P4	ENST00000436160.1	processed_pseudogene	0.55276	0.653646	-1.18178	-1.02937	0.321242	0.49124	0.563084	-0.553454	0.397338	0.834258
ENSG00000214812	RP5-1053E7.3	ENST00000399029.3	processed_pseudogene	0.203367	0.276021	-1.93442	-2.63768	1	1	-2.34002	-3.05523	1	1
ENSG00000169403	PTAFR	ENST00000305392.3,ENST00000373857.7,ENST00000539896.1	protein_coding	2.29191e-07	7.81556e-07	-2.48295	2.02792	1.94733e-07	1.10585e-06	-1.64915	2.15814	6.81395e-06	4.75047e-05
ENSG00000126698	DNAJC8	ENST00000603289.5,ENST00000482674.5,ENST00000263697.5,ENST00000488868.1,ENST00000470967.1,ENST00000489277.5	processed_transcript,protein_coding	8.22081e-08	2.92555e-07	-2.30537	6.51594	6.61282e-08	3.95311e-07	-0.459165	7.13579	0.0342116	0.114937
ENSG00000130770	ATPIF1	ENST00000468425.2,ENST00000465645.1,ENST00000335514.9,ENST00000497986.5	protein_coding	0.874395	0.882643	-0.0327967	4.79438	0.915629	1	-0.0672422	4.88043	0.736473	1
ENSG00000271398	RP5-1092A3.5	ENST00000605846.1	lincRNA	1.54983e-17	1.07884e-16	6.05478	-0.0101499	8.66724e-10	6.33802e-09	-2.34027	-3.05521	1	1
ENSG00000130766	SESN2	ENST00000253063.3	protein_coding	3.02341e-59	6.6403e-58	2.65391	7.82723	8.06449e-12	7.2735e-11	-1.18876	5.59637	0.000454236	0.00238132
ENSG00000130772	MED18	ENST00000475655.1,ENST00000373842.8,ENST00000474683.1,ENST00000398997.2,ENST00000479574.5	processed_transcript,protein_coding	0.104218	0.158892	-0.420384	3.47418	0.161247	0.302474	0.287983	3.90763	0.206687	0.507285
ENSG00000204138	PHACTR4	ENST00000373839.7,ENST00000463428.5,ENST00000633167.1,ENST00000632964.1,ENST00000493669.2,ENST00000633371.1,ENST00000632202.1,ENST00000373836.4,ENST00000632421.1	nonsense_mediated_decay,processed_transcript,retained_intron,protein_coding	0.034195	0.0588713	-0.728644	5.5508	0.0409615	0.093767	0.148662	6.04469	0.350361	0.753363
ENSG00000229820	RP1-308E4.1	ENST00000438601.2	processed_pseudogene	0.0998168	0.152851	-4.72227	-1.74944	0.0619168	0.134908	0.57905	-1.27183	0.470711	0.950331
ENSG00000180198	RCC1	ENST00000486790.2,ENST00000419074.5,ENST00000411533.5,ENST00000373832.5,ENST00000429051.1,ENST00000373831.7,ENST00000478232.1,ENST00000398958.6,ENST00000373833.10,ENST00000430407.1,ENST00000427469.5,ENST00000434290.5	processed_transcript,retained_intron,protein_coding	0.0101001	0.0192097	0.508035	7.30466	0.0536212	0.119224	0.425057	7.36391	0.0951222	0.27317
ENSG00000242125	SNHG3	ENST00000447507.1,ENST00000437681.1,ENST00000413987.1	retained_intron	1.60174e-48	2.90564e-47	2.81702	9.99438	3.48041e-23	7.08029e-22	0.334291	8.27009	0.0393727	0.13005
ENSG00000231468	PRDX3P2	ENST00000447051.2	processed_pseudogene	0.463275	0.56351	1.03072	-2.47703	1	1	-2.34027	-3.05521	1	1
ENSG00000180098	TRNAU1AP	ENST00000480930.5,ENST00000464880.5,ENST00000495995.5,ENST00000491577.5,ENST00000497790.5,ENST00000495215.5,ENST00000464093.1,ENST00000411406.3,ENST00000373830.4,ENST00000484775.1	processed_transcript,protein_coding	0.921357	0.926977	-0.0823373	4.35637	0.767057	1	-0.104244	4.44855	0.613246	1
ENSG00000197989	SNHG12	ENST00000470977.5,ENST00000464612.5,ENST00000461832.1,ENST00000481220.5,ENST00000481368.5,ENST00000464115.1,ENST00000461448.5,ENST00000474814.1	retained_intron	9.32965e-176	8.93859e-174	5.42824	9.71639	1.35745e-58	1.65795e-56	0.926724	5.90308	2.64223e-05	0.000169001
ENSG00000120656	TAF12	ENST00000495422.1,ENST00000263974.4,ENST00000471683.5,ENST00000373824.8	processed_transcript,protein_coding	0.00600853	0.0120964	0.11957	4.01915	0.711814	0.978729	0.405417	4.28012	0.0589885	0.183034
ENSG00000188060	RAB42	ENST00000465518.2,ENST00000373826.3	protein_coding	2.91255e-16	1.88476e-15	1.58721	0.227781	0.0127507	0.0335518	1.12152	0.146296	0.0442497	0.143528
ENSG00000229388	LINC01715	ENST00000427804.1,ENST00000420776.1	lincRNA	1.21511e-07	4.24863e-07	2.62024	-0.0484135	0.000347705	0.00125144	-0.327069	-1.4178	0.844099	1
ENSG00000270103	RNU11	ENST00000602813.1	lincRNA	3.29096e-198	4.2984e-196	6.64346	8.16922	1.23278e-29	3.56682e-28	-0.852264	2.28324	0.00381369	0.0165095
ENSG00000162419	GMEB1	ENST00000480454.1,ENST00000294409.2,ENST00000373816.5,ENST00000361872.8	processed_transcript,protein_coding	2.51861e-06	7.7885e-06	-0.781752	4.91027	0.00407781	0.0120212	0.162681	5.42672	0.349209	0.751441
ENSG00000198492	YTHDF2	ENST00000476976.1,ENST00000373812.7,ENST00000468863.1,ENST00000541996.5,ENST00000542507.5,ENST00000475796.5,ENST00000478283.5,ENST00000496288.5,ENST00000474884.5	processed_transcript,protein_coding	0.284785	0.372572	-0.360415	6.70984	0.168871	0.315114	0.324575	7.15453	0.0459187	0.147693
ENSG00000116329	OPRD1	ENST00000234961.6,ENST00000621425.1	protein_coding	6.65921e-15	3.98755e-14	5.024	-0.206278	8.48211e-09	5.60453e-08	-0.0383605	-2.64022	1	1
ENSG00000159023	EPB41	ENST00000373798.5,ENST00000356093.6,ENST00000488277.1,ENST00000462032.1,ENST00000482464.5,ENST00000343067.8,ENST00000347529.7,ENST00000460378.1,ENST00000490308.1,ENST00000636666.1,ENST00000373797.1,ENST00000373800.7,ENST00000349460.8	processed_transcript,protein_coding	1.18724e-08	4.56094e-08	-1.61361	7.0994	9.4755e-06	4.33228e-05	-0.165027	7.71284	0.304226	0.671997
ENSG00000225616	RP4-604A21.1	ENST00000425821.2	processed_pseudogene	0.456484	0.557396	-1.93442	-2.63768	1	1	-0.0367736	-2.90344	1	1
ENSG00000253304	TMEM200B	ENST00000521452.1,ENST00000420504.2	protein_coding	0.00317796	0.00667157	2.17962	-1.0276	0.0415575	0.0950565	-2.36122	-2.3176	0.162322	0.41551
ENSG00000225750	RP11-242O24.3	ENST00000413004.1	lincRNA	0.00110869	0.002496	-3.06599	-0.872607	0.0126979	0.0334211	0.635093	-0.139215	0.220776	0.535663
ENSG00000116350	SRSF4	ENST00000497015.5,ENST00000373795.6,ENST00000477193.1,ENST00000466448.4,ENST00000634348.1,ENST00000622143.1,ENST00000605204.1,ENST00000489898.1	nonsense_mediated_decay,retained_intron,protein_coding	0.126435	0.189309	-0.577766	6.35259	0.0283099	0.0681755	0.0917219	6.76206	0.55131	1
ENSG00000116353	MECR	ENST00000475861.6,ENST00000493928.1,ENST00000464915.1,ENST00000483435.5,ENST00000464511.1,ENST00000484012.5,ENST00000263702.10,ENST00000373791.7,ENST00000463052.5,ENST00000489248.5,ENST00000463412.1,ENST00000475773.5,ENST00000482610.1,ENST00000453185.5,ENST00000478505.6,ENST00000474946.5,ENST00000473030.5,ENST00000490529.5	nonsense_mediated_decay,processed_transcript,protein_coding	0.147813	0.217562	-0.124704	4.5445	0.644084	0.906362	0.306204	4.86805	0.188659	0.469373
ENSG00000060656	PTPRU	ENST00000465525.6,ENST00000492954.1,ENST00000527027.1,ENST00000493601.5,ENST00000428026.6,ENST00000531385.1,ENST00000345512.7,ENST00000373779.7,ENST00000415600.6,ENST00000526080.1,ENST00000460170.2	processed_transcript,retained_intron,protein_coding	1.11214e-09	4.66246e-09	3.1337	0.343286	4.33197e-07	2.35673e-06	0.394745	-1.1382	0.608419	1
ENSG00000230523	LINC01756	ENST00000417651.1	lincRNA	0.167214	0.238398	3.88882	-2.46187	0.312854	0.479929	-5.12548e-15	-3.2253	1	1
ENSG00000228176	RP4-656G21.1	ENST00000422638.1	lincRNA	0.776051	0.81884	0	-2.80372	1	1	-5.12548e-15	-3.2253	1	1
ENSG00000233399	LINC01648	ENST00000445180.2	lincRNA	0.61423	0.680069	2.96192	-2.62475	1	1	-5.12548e-15	-3.2253	1	1
ENSG00000236335	RP4-591L5.1	ENST00000427319.1	lincRNA	0.0326372	0.0563803	4.48841	-2.31164	0.190109	0.331684	-5.12548e-15	-3.2253	1	1
ENSG00000231949	RP4-591L5.2	ENST00000420354.1	lincRNA	0.0369144	0.0627395	4.4265	-2.31559	0.190109	0.331684	-5.12548e-15	-3.2253	1	1
ENSG00000162510	MATN1	ENST00000494561.1,ENST00000373765.4,ENST00000477320.1	processed_transcript,protein_coding	6.7913e-69	1.75969e-67	6.10875	3.37949	1.02265e-42	5.78179e-41	-1.26774	-1.58061	0.251162	0.595366
ENSG00000162511	LAPTM5	ENST00000294507.3,ENST00000464569.1,ENST00000476492.1	processed_transcript,protein_coding	4.37512e-19	3.27647e-18	-0.818847	6.49036	0.0073468	0.0204843	0.869183	7.4434	5.44425e-06	3.84583e-05
ENSG00000223382	LINC01778	ENST00000635357.1,ENST00000634980.1,ENST00000430320.3,ENST00000438790.1,ENST00000635288.1,ENST00000634587.1,ENST00000635044.1,ENST00000634319.1,ENST00000635009.1	lincRNA	3.33619e-17	2.2797e-16	7.47571	-0.507066	3.8221e-07	2.09144e-06	-5.12548e-15	-3.2253	1	1
ENSG00000162512	SDC3	ENST00000471567.1,ENST00000336798.11,ENST00000339394.6,ENST00000487984.1	processed_transcript,protein_coding	2.56993e-28	2.74584e-27	9.04987	1.02553	7.67943e-14	8.24914e-13	5.90716	-1.704	0.000641827	0.00326994
ENSG00000134644	PUM1	ENST00000525948.5,ENST00000373741.8,ENST00000257075.9,ENST00000525843.5,ENST00000498627.1,ENST00000530669.1,ENST00000524516.1,ENST00000527498.1,ENST00000529846.5,ENST00000498419.5,ENST00000424085.6,ENST00000440538.6,ENST00000526215.5,ENST00000373742.6,ENST00000532678.1,ENST00000426105.6,ENST00000373747.7,ENST00000480602.1,ENST00000531867.1,ENST00000526128.1,ENST00000471894.1,ENST00000490546.1,ENS…	nonsense_mediated_decay,processed_transcript,retained_intron,protein_coding	0.468607	0.568051	0.601638	7.65465	0.0334741	0.0793401	0.277791	7.57572	0.0698614	0.211192
ENSG00000084628	NKAIN1	ENST00000530145.1,ENST00000528449.1,ENST00000533581.1,ENST00000526106.5,ENST00000373736.6	processed_transcript,retained_intron,protein_coding	8.37436e-08	2.97722e-07	4.56021	-1.23254	0.000221216	0.000823514	-2.34027	-3.05521	1	1
ENSG00000060688	SNRNP40	ENST00000489853.1,ENST00000463988.1,ENST00000491106.1,ENST00000486941.1,ENST00000474025.1,ENST00000373720.3,ENST00000263694.8	processed_transcript,protein_coding	2.88496e-05	7.98051e-05	-1.53778	6.28949	5.50085e-09	3.72623e-08	-0.183179	6.87277	0.527145	0.988435
ENSG00000229447	RP11-490K7.4	ENST00000452686.2	processed_pseudogene	0.0236322	0.0421323	-2.04001	0.627531	0.00684228	0.0191711	0.0263099	1.18424	0.963002	1
ENSG00000121766	ZCCHC17	ENST00000546109.5,ENST00000616393.4,ENST00000479629.5,ENST00000616859.4,ENST00000627541.1,ENST00000344147.9,ENST00000618216.4,ENST00000615916.4,ENST00000373714.5	processed_transcript,protein_coding	0.000182544	0.000457074	1.14539	5.45966	1.20445e-05	5.43081e-05	-0.060667	4.86147	0.811816	1
ENSG00000121769	FABP3	ENST00000497275.5,ENST00000482018.1,ENST00000373713.6,ENST00000498148.5	nonsense_mediated_decay,processed_transcript,protein_coding	0.218042	0.293401	1.12658	-2.20942	0.681087	0.942069	-3.19038	-2.90305	0.52202	0.980779
ENSG00000168528	SERINC2	ENST00000487207.5,ENST00000536859.5,ENST00000536384.2,ENST00000491976.1,ENST00000373709.7,ENST00000373710.5	processed_transcript,protein_coding	1.17253e-20	9.42265e-20	1.9298	0.0370468	0.00162912	0.00520798	2.47945	0.722027	1.18472e-08	1.13337e-07
ENSG00000215899	RP11-439L8.2	ENST00000401075.3	processed_pseudogene	0.356593	0.455147	1.0275	-2.4767	1	1	-0.0351495	-2.90331	1	1
ENSG00000260386	LINC01225	ENST00000562271.1,ENST00000562339.5,ENST00000566792.6,ENST00000563550.5,ENST00000570127.1	processed_transcript,retained_intron,transcribed_unitary_pseudogene	0.000111933	0.000287221	0.183414	0.0632765	0.92891	1	-0.00584542	0.041115	1	1
ENSG00000284543	LINC01226	ENST00000640623.1,ENST00000638644.1,ENST00000640157.1,ENST00000639946.1,ENST00000640630.1,ENST00000640226.1,ENST00000639741.1,ENST00000639839.1,ENST00000639047.1	processed_transcript	3.07185e-07	1.03658e-06	-1.27991	0.0951131	0.126555	0.243069	-0.689479	0.185716	0.193473	0.479821
ENSG00000142910	TINAGL1	ENST00000463112.1,ENST00000481165.5,ENST00000271064.11,ENST00000468635.5,ENST00000478398.5,ENST00000480586.1,ENST00000466998.1,ENST00000457433.6,ENST00000537531.2,ENST00000498429.5,ENST00000461030.5	processed_transcript,protein_coding	0.00533208	0.0108149	3.08387	-1.56619	0.0211895	0.0529779	-3.18992	-2.90309	0.52202	0.980779
ENSG00000121764	HCRTR1	ENST00000485464.5,ENST00000373705.1,ENST00000373706.9,ENST00000403528.6,ENST00000468521.1	processed_transcript,protein_coding	4.93943e-05	0.000132736	5.83237	-1.72526	0.00763221	0.021184	-5.12548e-15	-3.2253	1	1
ENSG00000162517	PEF1	ENST00000478502.5,ENST00000472443.1,ENST00000492061.5,ENST00000489164.5,ENST00000373703.4,ENST00000496805.5,ENST00000461006.5,ENST00000471219.1	processed_transcript,protein_coding	0.817469	0.833514	0.0669139	4.88588	0.79723	1	-0.0485319	4.93324	0.844936	1
ENSG00000084636	COL16A1	ENST00000468459.5,ENST00000474000.5,ENST00000440437.1,ENST00000488897.5,ENST00000482478.5,ENST00000532877.1,ENST00000479100.1,ENST00000373672.7,ENST00000373667.4,ENST00000466829.5,ENST00000458715.5,ENST00000461217.1,ENST00000373668.7,ENST00000488128.6,ENST00000482910.1,ENST00000470799.5,ENST00000529928.1	processed_transcript,retained_intron,protein_coding	3.19398e-19	2.40601e-18	5.15731	0.410207	1.76433e-11	1.54174e-10	-0.0444734	-2.4181	1	1
ENSG00000121753	ADGRB2	ENST00000398538.5,ENST00000533175.1,ENST00000420125.5,ENST00000398556.7,ENST00000373655.6,ENST00000530134.5,ENST00000527361.5,ENST00000436464.1,ENST00000398542.5,ENST00000465256.5,ENST00000530999.1,ENST00000398547.5,ENST00000468430.1,ENST00000466109.1,ENST00000373658.7	processed_transcript,retained_intron,protein_coding	9.22788e-11	4.19747e-10	3.78294	0.431083	8.24139e-06	3.80006e-05	-2.7627	-2.1369	0.0535698	0.16879
ENSG00000134668	SPOCD1	ENST00000257100.7,ENST00000485944.5,ENST00000528791.5,ENST00000460061.5,ENST00000452755.6,ENST00000532604.5,ENST00000528579.1,ENST00000473361.5,ENST00000529396.1,ENST00000360482.6,ENST00000468720.5,ENST00000533231.5,ENST00000531039.5,ENST00000525930.1	retained_intron,protein_coding	1.66845e-14	9.741e-14	7.48261	-0.505038	1.68466e-07	9.63353e-07	-5.12548e-15	-3.2253	1	1
ENSG00000203620	RP11-84A19.2	ENST00000453837.1	lincRNA	0.284888	0.372676	1.91968	-2.33037	0.681087	0.942069	0.81004	-2.76601	1	1
ENSG00000269967	RP11-84A19.4	ENST00000602889.1	lincRNA	0.211808	0.286082	-0.467458	-0.129457	0.529745	0.768478	0.643414	0.37217	0.228818	0.551327
ENSG00000184007	PTP4A2	ENST00000475464.1,ENST00000526960.1,ENST00000534796.5,ENST00000602683.5,ENST00000528840.1,ENST00000468531.1,ENST00000470404.5,ENST00000528253.3,ENST00000489313.1,ENST00000626355.1,ENST00000484483.1,ENST00000494444.2,ENST00000457805.6,ENST00000524384.5,ENST00000533408.1,ENST00000529477.5,ENST00000627328.2,ENST00000602725.5,ENST00000532001.6,ENST00000532289.1	nonsense_mediated_decay,processed_transcript,retained_intron,protein_coding	1.6226e-11	7.79275e-11	-2.21631	7.55518	3.69926e-11	3.12917e-10	-0.268571	8.24744	0.107274	0.30056
ENSG00000121774	KHDRBS1	ENST00000484270.2,ENST00000492989.1,ENST00000327300.11,ENST00000307714.12	processed_transcript,protein_coding	0.000121801	0.000311189	-1.34199	7.88326	8.77951e-07	4.61169e-06	0.180156	8.60022	0.234037	0.561577
ENSG00000121775	TMEM39B	ENST00000498613.1,ENST00000336294.9,ENST00000487305.5,ENST00000441402.5,ENST00000468135.5,ENST00000438825.5,ENST00000466321.5,ENST00000472503.5,ENST00000476968.5	nonsense_mediated_decay,processed_transcript,protein_coding	0.724845	0.7804	-0.128862	4.5722	0.626897	0.885447	-0.228819	4.62735	0.373109	0.793426
ENSG00000025800	KPNA6	ENST00000471599.5,ENST00000469790.1,ENST00000446515.1,ENST00000373625.7	nonsense_mediated_decay,processed_transcript,protein_coding	0.00685659	0.0135816	-0.92352	6.68086	0.00179092	0.00569562	0.0392081	7.19249	0.869823	1
ENSG00000084652	TXLNA	ENST00000373609.1,ENST00000373610.7	protein_coding	0.0940301	0.144724	-0.320675	7.42172	0.218873	0.376515	-0.0465693	7.65481	0.786874	1
ENSG00000160050	CCDC28B	ENST00000373602.9,ENST00000483009.1,ENST00000421922.6,ENST00000461819.5,ENST00000469003.5	nonsense_mediated_decay,processed_transcript,protein_coding	1.34466e-28	1.44587e-27	-1.87822	2.02303	1.79711e-05	7.90372e-05	-3.61314	1.78094	4.24237e-19	8.51134e-18
ENSG00000160051	IQCC	ENST00000617816.1,ENST00000291358.10,ENST00000537469.2	retained_intron,protein_coding	0.00839418	0.0161621	-0.603566	3.01995	0.073528	0.157279	-0.246234	3.24618	0.335474	0.727315
ENSG00000222046	DCDC2B	ENST00000487056.1,ENST00000409358.1	retained_intron,protein_coding	0.0194684	0.0352429	3.25777	-1.47865	0.0094719	0.0257323	1.17924	-2.319	0.508709	0.980779
ENSG00000160055	TMEM234	ENST00000487174.1,ENST00000309777.10,ENST00000466796.1,ENST00000344461.7,ENST00000483001.5,ENST00000461402.5,ENST00000485689.1,ENST00000484490.1,ENST00000373593.5,ENST00000491434.5,ENST00000495091.5,ENST00000489170.5	nonsense_mediated_decay,processed_transcript,retained_intron,protein_coding	1.57596e-13	8.6369e-13	2.44612	4.27622	4.00205e-15	4.72214e-14	0.423658	2.96439	0.0863687	0.251392
ENSG00000084623	EIF3I	ENST00000373586.1,ENST00000471486.5,ENST00000474371.1,ENST00000483517.5,ENST00000355082.9,ENST00000489353.5	processed_transcript,protein_coding	6.09939e-07	2.00185e-06	-0.826817	6.69579	0.00157656	0.00505258	0.6103	7.49061	0.0325374	0.110075
ENSG00000220785	MTMR9LP	ENST00000441044.5,ENST00000423995.5,ENST00000426597.2,ENST00000403496.6	transcribed_unprocessed_pseudogene,processed_transcript	2.31349e-06	7.18753e-06	6.08482	-1.54566	0.00547945	0.0156752	-5.12548e-15	-3.2253	1	1
ENSG00000183615	FAM167B	ENST00000373582.3	protein_coding	0.043857	0.0725958	0.781806	-1.88665	0.745163	1	-4.10887	-2.63975	0.158698	0.408127
ENSG00000182866	LCK	ENST00000469956.1,ENST00000477031.6,ENST00000336890.9,ENST00000355928.7,ENST00000373557.6,ENST00000373564.7,ENST00000469765.5,ENST00000495610.6,ENST00000482949.5,ENST00000461712.6,ENST00000373562.7,ENST00000476457.5,ENST00000333070.4,ENST00000619559.4	retained_intron,protein_coding	2.67015e-66	6.67538e-65	-3.71777	2.18281	1.23142e-13	1.29624e-12	-10.2286	2.03303	3.08351e-35	1.15813e-33
ENSG00000116478	HDAC1	ENST00000484305.1,ENST00000482310.5,ENST00000476391.5,ENST00000472928.5,ENST00000481281.5,ENST00000373548.7,ENST00000471488.1,ENST00000463172.5,ENST00000490081.5,ENST00000428704.1	processed_transcript,retained_intron,protein_coding	1.12915e-07	3.96062e-07	-1.20851	6.81794	5.00941e-06	2.38685e-05	0.214586	7.51306	0.283376	0.635595
ENSG00000175130	MARCKSL1	ENST00000329421.7	protein_coding	2.10382e-131	1.2174e-129	4.36061	8.91023	2.6655e-39	1.2562e-37	-1.68617	4.98306	8.70829e-20	1.80834e-18
ENSG00000233775	RP4-811H24.9	ENST00000448134.1	lincRNA	0.0568852	0.0918615	3.24882	-1.17334	0.0789194	0.163057	0.646267	-2.22571	0.796003	1
ENSG00000162526	TSSK3	ENST00000574792.1,ENST00000421153.2,ENST00000574315.1,ENST00000373534.3	processed_transcript,protein_coding	1.84547e-05	5.21136e-05	-0.980545	0.516337	0.116122	0.227411	-2.41254	0.154797	5.56327e-05	0.000339936
ENSG00000225828	FAM229A	ENST00000432622.1,ENST00000415596.1,ENST00000428500.1,ENST00000416512.1	processed_transcript,retained_intron,protein_coding	0.255806	0.338731	0.0964294	2.7711	0.792158	1	0.263547	2.96161	0.512212	0.980779
ENSG00000160058	BSDC1	ENST00000474414.5,ENST00000527163.5,ENST00000373520.8,ENST00000533084.1,ENST00000341071.11,ENST00000455895.6,ENST00000530876.5,ENST00000530485.1,ENST00000527513.5,ENST00000531222.1,ENST00000446293.6,ENST00000463967.1,ENST00000419121.6,ENST00000530753.1,ENST00000444377.5,ENST00000526031.5	nonsense_mediated_decay,processed_transcript,retained_intron,protein_coding	3.50827e-13	1.88269e-12	1.91148	7.00795	8.4282e-13	8.29343e-12	0.0117189	5.87478	0.947348	1
ENSG00000224333	GAPDHP20	ENST00000444107.1	processed_pseudogene	0.61423	0.680069	2.96192	-2.62475	1	1	-5.12548e-15	-3.2253	1	1
ENSG00000229259	LRRC37A12P	ENST00000454917.1	unprocessed_pseudogene	0.0480562	0.0788737	4.39582	-2.31757	0.190109	0.331684	-5.12548e-15	-3.2253	1	1
ENSG00000254553	RP1-27O5.3	ENST00000480336.1	nonsense_mediated_decay	0.360164	0.458759	0	-2.80372	1	1	-5.12548e-15	-3.2253	1	1
ENSG00000273274	ZBTB8B	ENST00000609129.1	protein_coding	0.00870768	0.0167284	4.81342	-2.18143	0.0791691	0.163057	-5.12548e-15	-3.2253	1	1
ENSG00000160062	ZBTB8A	ENST00000373510.8,ENST00000316459.4	protein_coding	1.66815e-07	5.7628e-07	-2.10834	1.35017	0.000122798	0.000476886	-1.36435	1.45233	0.000622203	0.00317957
ENSG00000176261	ZBTB8OS	ENST00000373506.7,ENST00000492007.5,ENST00000473294.6,ENST00000473383.1,ENST00000498691.5,ENST00000468695.5,ENST00000466361.1,ENST00000341885.5,ENST00000479075.5,ENST00000467652.5,ENST00000436661.5,ENST00000476493.5,ENST00000483138.5,ENST00000373501.6,ENST00000465588.2	nonsense_mediated_decay,processed_transcript,retained_intron,protein_coding	0.0361996	0.0617938	0.56756	3.78688	0.116809	0.22863	0.641718	3.94579	0.00498059	0.0209104
ENSG00000162521	RBBP4	ENST00000401893.7,ENST00000373493.9,ENST00000373485.5,ENST00000458695.6,ENST00000414241.7,ENST00000492348.6,ENST00000524393.5,ENST00000525506.1,ENST00000465780.1,ENST00000526193.5,ENST00000475321.5,ENST00000527118.5,ENST00000477563.6,ENST00000445722.2,ENST00000531983.1,ENST00000460669.5,ENST00000463378.5,ENST00000482190.1,ENST00000490500.5	nonsense_mediated_decay,processed_transcript,retained_intron,protein_coding	2.36654e-05	6.60412e-05	-1.30573	8.27202	5.19173e-06	2.46858e-05	0.129044	8.9524	0.398277	0.835894
ENSG00000162520	SYNC	ENST00000409190.7,ENST00000417633.1,ENST00000373484.4,ENST00000426909.1	protein_coding	0.0102279	0.0194436	1.03072	-2.47703	1	1	-0.0370231	-2.90342	1	1
ENSG00000162522	KIAA1522	ENST00000294521.7,ENST00000373481.7,ENST00000468130.1,ENST00000401073.6,ENST00000373480.1	retained_intron,protein_coding	6.46382e-32	7.76144e-31	-2.63997	2.67043	2.24958e-10	1.75749e-09	-3.03638	2.6237	1.45263e-14	2.24669e-13
ENSG00000134684	YARS	ENST00000487404.5,ENST00000469100.5,ENST00000481895.5,ENST00000466052.1,ENST00000373477.8,ENST00000478828.1,ENST00000472692.1,ENST00000490826.1,ENST00000616261.1,ENST00000470377.1	processed_transcript,protein_coding	2.43152e-05	6.77659e-05	-1.61702	8.02564	1.84066e-09	1.30833e-08	-0.545737	8.47534	0.000288777	0.00156175
ENSG00000116497	S100PBP	ENST00000475486.1,ENST00000530710.5,ENST00000529027.5,ENST00000474103.1,ENST00000373476.5,ENST00000525203.5,ENST00000531123.5,ENST00000524535.5,ENST00000526230.1,ENST00000482212.1,ENST00000527692.1,ENST00000356689.7,ENST00000477248.1,ENST00000373475.9,ENST00000530552.1,ENST00000531256.1	processed_transcript,retained_intron,protein_coding	0.0147818	0.0273625	-0.679468	6.00912	0.0127105	0.0334514	0.169557	6.49898	0.516643	0.980779
ENSG00000160097	FNDC5	ENST00000481487.1,ENST00000465346.1,ENST00000483143.1,ENST00000496770.1,ENST00000640867.1,ENST00000497068.1,ENST00000373471.7	processed_transcript,protein_coding	3.50712e-06	1.07057e-05	6.46029	-1.36223	0.00422352	0.0124198	-5.12548e-15	-3.2253	1	1
ENSG00000121905	HPCA	ENST00000470166.5,ENST00000480118.5,ENST00000373467.3,ENST00000470896.1,ENST00000459874.5	processed_transcript,protein_coding	0.00868725	0.0166922	3.45741	-1.845	0.0238108	0.0585346	-0.0367736	-2.90344	1	1
ENSG00000121900	TMEM54	ENST00000329151.5,ENST00000482771.1,ENST00000373463.7,ENST00000463914.1,ENST00000474144.5,ENST00000475208.5	processed_transcript,protein_coding	4.37434e-35	5.7652e-34	7.74511	-0.271916	5.74134e-09	3.87519e-08	6.94286	-0.943887	1.20074e-07	1.03345e-06
ENSG00000116514	RNF19B	ENST00000235150.4,ENST00000373456.11,ENST00000356990.9	protein_coding	5.41161e-98	2.09397e-96	4.73735	7.71249	4.71757e-32	1.54833e-30	-0.30613	3.89612	0.30602	0.675122
ENSG00000217644	RP4-803A2.1	ENST00000401937.3	processed_pseudogene	0.174239	0.241276	3.8541	-2.46383	0.312854	0.479929	-5.12548e-15	-3.2253	1	1
ENSG00000239670	RP4-803A2.2	ENST00000447420.1	unprocessed_pseudogene	0.814432	0.830765	0	-2.80372	1	1	2.30487	-3.05545	1	1
ENSG00000004455	AK2	ENST00000550338.5,ENST00000354858.10,ENST00000626911.1,ENST00000373449.6,ENST00000548559.1,ENST00000466029.1,ENST00000629371.2,ENST00000467905.5,ENST00000491241.1,ENST00000469238.1,ENST00000551979.1,ENST00000548033.5,ENST00000480134.5,ENST00000487289.1,ENST00000482191.1	nonsense_mediated_decay,processed_transcript,retained_intron,protein_coding	6.59807e-12	3.26233e-11	-0.647106	7.84038	0.0170955	0.0438206	1.10097	8.88617	6.97443e-09	6.84396e-08
ENSG00000142920	AZIN2	ENST00000477570.5,ENST00000462920.5,ENST00000373443.7,ENST00000478635.5,ENST00000497710.5,ENST00000481886.5,ENST00000497280.1,ENST00000495135.5,ENST00000478204.5,ENST00000471119.5,ENST00000473089.5,ENST00000484656.5,ENST00000483027.5,ENST00000492521.1,ENST00000373441.1,ENST00000475935.5,ENST00000294517.10,ENST00000373440.5,ENST00000492420.5	processed_transcript,protein_coding	2.15486e-130	1.23798e-128	8.42508	6.30834	3.91997e-87	2.41229e-84	0.530104	-0.49909	0.505015	0.980779
ENSG00000116525	TRIM62	ENST00000486583.1,ENST00000291416.9,ENST00000485148.1,ENST00000543586.1	processed_transcript,protein_coding	0.000673948	0.00156687	1.69677	2.93601	1.9298e-06	9.68836e-06	0.87295	2.51811	0.00755512	0.0304029
ENSG00000160094	ZNF362	ENST00000490959.2,ENST00000539719.5,ENST00000373428.5,ENST00000477934.1,ENST00000483388.5	processed_transcript,retained_intron,protein_coding	5.47703e-18	3.8784e-17	-2.68933	4.85542	6.63e-18	9.6656e-17	-1.21886	5.23985	8.64633e-10	9.28153e-09
ENSG00000270115	RP11-415J8.7	ENST00000602618.1	lincRNA	0.000381067	0.000914995	-3.94698	-0.217678	0.000137594	0.000528635	0.14245	0.418132	0.814113	1
ENSG00000184389	A3GALT2	ENST00000442999.3	protein_coding	0.000406801	0.000974154	2.642	-1.19631	0.0248336	0.0605005	-0.958147	-2.41768	0.755604	1
ENSG00000134686	PHC2	ENST00000468406.5,ENST00000459964.1,ENST00000473158.1,ENST00000467894.5,ENST00000493483.5,ENST00000257118.5,ENST00000431992.5,ENST00000373418.7,ENST00000486897.5,ENST00000484692.1,ENST00000485928.5,ENST00000373422.7	processed_transcript,protein_coding	0.00105285	0.0023768	-0.845038	6.13841	0.00610269	0.0172347	-0.705974	6.29075	1.98164e-05	0.000129334
ENSG00000234512	TLR12P	ENST00000413515.1	unitary_pseudogene	0.174239	0.241276	3.8541	-2.46383	0.312854	0.479929	-5.12548e-15	-3.2253	1	1
ENSG00000121903	ZSCAN20	ENST00000373413.2,ENST00000480917.1,ENST00000361328.7	processed_transcript,protein_coding	0.000133696	0.000340248	0.614972	3.55275	0.0321509	0.0764985	0.993174	3.90893	3.0961e-06	2.24813e-05
ENSG00000235907	RP4-580O19.2	ENST00000424879.2	processed_pseudogene	0.61423	0.680069	2.96192	-2.62475	1	1	-5.12548e-15	-3.2253	1	1
ENSG00000121904	CSMD2	ENST00000373377.1,ENST00000465819.1,ENST00000338325.1,ENST00000619121.4,ENST00000489419.1,ENST00000373381.8,ENST00000241312.8,ENST00000373380.5,ENST00000471438.2,ENST00000373388.6	nonsense_mediated_decay,processed_transcript,protein_coding	6.75378e-13	3.56635e-12	5.62631	-0.383109	1.88455e-06	9.47309e-06	-2.34002	-3.05523	1	1
ENSG00000163866	SMIM12	ENST00000521580.2,ENST00000456842.1,ENST00000446026.1,ENST00000426886.1,ENST00000417239.1,ENST00000423898.1	nonsense_mediated_decay,protein_coding	0.13845	0.205272	0.383464	5.03231	0.167241	0.312363	0.298106	5.09331	0.137895	0.371342
ENSG00000189280	GJB5	ENST00000338513.1	protein_coding	0.00836335	0.0161085	4.78587	-2.18341	0.120517	0.232546	-5.12548e-15	-3.2253	1	1
ENSG00000189433	GJB4	ENST00000339480.1	protein_coding	0.00669673	0.0132946	4.86874	-2.17746	0.0791691	0.163057	-5.12548e-15	-3.2253	1	1
ENSG00000188910	GJB3	ENST00000373362.3,ENST00000373366.2	protein_coding	4.8583e-05	0.000130742	5.78209	-1.73129	0.00960615	0.0259867	-5.12548e-15	-3.2253	1	1
ENSG00000187513	GJA4	ENST00000342280.4,ENST00000450137.1	protein_coding	0.174239	0.241276	3.8541	-2.46383	0.312854	0.479929	-5.12548e-15	-3.2253	1	1
ENSG00000116544	DLGAP3	ENST00000235180.4,ENST00000495979.1,ENST00000373347.5	processed_transcript,protein_coding	2.6185e-16	1.70136e-15	0.531994	1.15004	0.390646	0.586418	-4.47794	0.121227	2.31402e-11	2.82628e-10
ENSG00000241014	RP11-244H3.1	ENST00000311990.4	lincRNA	0.0103044	0.019575	-1.68951	0.970751	0.0365394	0.0853851	-0.735384	1.18633	0.1533	0.405152
ENSG00000271741	RP11-244H3.4	ENST00000487874.1	nonsense_mediated_decay	0.808798	0.829111	0	-2.80372	1	1	-5.12548e-15	-3.2253	1	1
ENSG00000243749	TMEM35B	ENST00000373337.3	protein_coding	0.00635215	0.0126972	3.11758	-0.666055	0.000129486	0.000500307	0.920388	-1.7026	0.381296	0.807457
ENSG00000163867	ZMYM6	ENST00000471566.1,ENST00000460607.1,ENST00000415531.5,ENST00000357182.8,ENST00000493328.5,ENST00000373333.1,ENST00000317538.9,ENST00000472971.1,ENST00000466345.1	processed_transcript,protein_coding	0.00129951	0.00289604	-1.20443	3.63358	0.00662879	0.018612	0.621801	4.52599	0.00995423	0.0387985
ENSG00000233940	RPL12P45	ENST00000428087.1	processed_pseudogene	0.82932	0.839791	0	-2.80372	1	1	-5.12548e-15	-3.2253	1	1
ENSG00000197056	ZMYM1	ENST00000359858.8,ENST00000476269.1,ENST00000417119.5,ENST00000611874.4,ENST00000373329.5,ENST00000466390.5,ENST00000463393.1,ENST00000488455.5,ENST00000475654.5,ENST00000373330.1	processed_transcript,protein_coding	2.40289e-10	1.06059e-09	-3.23449	4.46516	9.24774e-18	1.33181e-16	-0.172826	5.30235	0.325578	0.70961
ENSG00000228348	EFCAB14P1	ENST00000442409.1	processed_pseudogene	0.159375	0.2309	-0.649154	-2.11022	1	1	-0.429391	-2.31831	1	1
ENSG00000116560	SFPQ	ENST00000485454.1,ENST00000460428.5,ENST00000485365.1,ENST00000466745.5,ENST00000490668.5,ENST00000466213.5,ENST00000468598.5,ENST00000357214.5,ENST00000471991.5,ENST00000470472.5	nonsense_mediated_decay,processed_transcript,protein_coding	0.0561948	0.090829	0.379714	9.70982	0.154272	0.29084	-0.022105	9.60278	0.910299	1
ENSG00000146463	ZMYM4	ENST00000482131.1,ENST00000457946.1,ENST00000314607.10,ENST00000492456.1,ENST00000470175.1,ENST00000441447.1	processed_transcript,protein_coding	3.99948e-09	1.59959e-08	-1.69814	6.98878	1.01539e-08	6.66377e-08	0.121075	7.76398	0.458307	0.930454
ENSG00000229994	RPL5P4	ENST00000434805.1	processed_pseudogene	0.49703	0.594867	-0.627682	0.0873009	0.385641	0.57953	0.0204444	0.328882	1	1
ENSG00000142687	KIAA0319L	ENST00000373266.8,ENST00000469892.5,ENST00000494948.1,ENST00000470388.5,ENST00000473423.1,ENST00000474856.1,ENST00000482929.6,ENST00000473465.1,ENST00000473844.1,ENST00000431916.5,ENST00000461312.5,ENST00000492544.1,ENST00000492888.1,ENST00000467109.1,ENST00000478463.6,ENST00000485551.5,ENST00000426982.6,ENST00000325722.7,ENST00000440579.5,ENST00000476329.1	nonsense_mediated_decay,processed_transcript,retained_intron,protein_coding	0.0353918	0.0605183	0.800877	6.17947	0.00301376	0.00911277	0.438384	6.06976	0.0378122	0.12557
ENSG00000020129	NCDN	ENST00000423723.1,ENST00000373243.6,ENST00000356090.8,ENST00000459931.1,ENST00000373253.7,ENST00000437806.1	processed_transcript,protein_coding	0.437081	0.538609	-0.257166	6.19829	0.402797	0.602905	-0.677772	6.12674	0.0176358	0.0644451
ENSG00000116819	TFAP2E	ENST00000373235.3	protein_coding	5.26591e-11	2.44429e-10	-0.81617	1.96408	0.167439	0.312697	-1.86458	1.71298	1.4234e-06	1.07833e-05
ENSG00000126067	PSMB2	ENST00000621781.4,ENST00000373237.3,ENST00000630477.1	processed_transcript,protein_coding	1.2907e-08	4.93928e-08	-1.72852	6.46316	1.76661e-08	1.13086e-07	0.174034	7.27122	0.590683	1
ENSG00000142686	C1orf216	ENST00000270815.4,ENST00000453178.1,ENST00000503824.1	processed_transcript,protein_coding	0.0120576	0.0226553	-0.855311	4.52043	0.00532072	0.0152732	0.169987	5.06203	0.369042	0.785876
ENSG00000092853	CLSPN	ENST00000318121.7,ENST00000517467.1,ENST00000520551.1,ENST00000251195.9,ENST00000373220.7,ENST00000466308.1	processed_transcript,retained_intron,protein_coding	1.75248e-17	1.21647e-16	-2.37003	5.9145	1.58125e-07	9.06809e-07	-0.336724	6.59341	0.2108	0.515482
ENSG00000134698	AGO4	ENST00000496257.1,ENST00000373210.3,ENST00000488778.1	processed_transcript,protein_coding	0.0272722	0.0481176	0.123013	5.36419	0.65641	0.922005	0.809608	5.86657	0.00123517	0.00595713
ENSG00000092847	AGO1	ENST00000373204.5,ENST00000373206.5,ENST00000635259.1	nonsense_mediated_decay,protein_coding	1.08313e-08	4.18146e-08	-1.31152	6.20718	7.22701e-07	3.83078e-06	0.385895	7.02338	0.015003	0.0557603
ENSG00000271164	RP4-789D17.4	ENST00000604465.1	processed_pseudogene	0.770289	0.817364	0	-2.80372	1	1	-5.12548e-15	-3.2253	1	1
ENSG00000271914	RP4-789D17.5	ENST00000606838.1	lincRNA	0.0123916	0.0232284	1.55468	-1.0485	0.145581	0.275868	0.403321	-1.4708	0.677035	1
ENSG00000126070	AGO3	ENST00000471099.1,ENST00000634486.1,ENST00000373191.8,ENST00000491443.2,ENST00000324350.9,ENST00000246314.10,ENST00000397828.3	nonsense_mediated_decay,retained_intron,protein_coding	0.0129847	0.0242691	1.14398	6.8192	5.53133e-05	0.000227043	0.262604	6.38309	0.132837	0.360466
ENSG00000092850	TEKT2	ENST00000473120.1,ENST00000207457.7,ENST00000469024.1	nonsense_mediated_decay,protein_coding	2.09199e-07	7.15058e-07	5.11994	-0.832908	5.07396e-06	2.4151e-05	-0.0351495	-2.90331	1	1
ENSG00000116863	ADPRHL2	ENST00000373178.4	protein_coding	0.234078	0.312431	-0.345166	4.35165	0.289004	0.479929	0.352312	4.79753	0.15263	0.403683
ENSG00000171812	COL8A2	ENST00000481785.1,ENST00000303143.9,ENST00000397799.1	protein_coding	9.7191e-08	3.43469e-07	6.67477	-1.15107	0.000261802	0.000963505	3.67772	-2.76648	0.283029	0.635084
ENSG00000054116	TRAPPC3	ENST00000616074.4,ENST00000469757.1,ENST00000373166.7,ENST00000373162.5,ENST00000616395.4,ENST00000497251.1,ENST00000617904.4,ENST00000373163.5,ENST00000462715.1,ENST00000373159.1	processed_transcript,protein_coding	0.0259822	0.0460192	-0.29861	5.22783	0.254503	0.431361	0.372475	5.66858	0.032046	0.108677
ENSG00000116871	MAP7D1	ENST00000530975.4,ENST00000532131.1,ENST00000429533.6,ENST00000316156.8,ENST00000373151.6,ENST00000462118.1,ENST00000527764.1,ENST00000373148.5,ENST00000487131.3,ENST00000530729.1,ENST00000487114.1,ENST00000474796.1,ENST00000373150.8	processed_transcript,retained_intron,protein_coding	0.2135	0.288076	0.49829	7.15063	0.0943515	0.190381	0.185652	7.08297	0.366719	0.781761
ENSG00000054118	THRAP3	ENST00000469141.6,ENST00000354618.9,ENST00000466743.1,ENST00000478853.1	processed_transcript,protein_coding	0.00511884	0.0104108	-1.05423	8.05419	0.000142096	0.000545016	0.0797946	8.63183	0.648418	1
ENSG00000214193	SH3D21	ENST00000474766.1,ENST00000453908.7,ENST00000505871.6,ENST00000496636.1,ENST00000480549.5,ENST00000508854.1	nonsense_mediated_decay,processed_transcript,protein_coding	1.2733e-16	8.44642e-16	2.18999	3.89657	1.17651e-12	1.14086e-11	-1.15583	2.11979	0.00194247	0.00900336
ENSG00000142694	EVA1B	ENST00000270824.1,ENST00000490466.1	processed_transcript,protein_coding	5.11968e-19	3.82066e-18	-1.8234	3.13218	8.1523e-08	4.8216e-07	-3.46215	2.94134	2.33476e-05	0.000150721
ENSG00000196182	STK40	ENST00000373129.7,ENST00000473733.5,ENST00000460417.5,ENST00000460017.1,ENST00000482458.1,ENST00000373130.7,ENST00000373132.3,ENST00000359297.6	processed_transcript,protein_coding	6.25693e-08	2.25424e-07	-0.288229	6.73115	0.279458	0.469062	-1.65266	6.37139	2.46235e-25	6.7174e-24
ENSG00000181817	LSM10	ENST00000315732.2,ENST00000476041.1,ENST00000489912.1	processed_transcript,protein_coding	3.09251e-05	8.51638e-05	-1.58365	4.40319	6.08275e-06	2.86668e-05	-1.09888	4.619	0.000122158	0.000703068
ENSG00000116885	OSCP1	ENST00000524789.1,ENST00000471369.1,ENST00000528112.1,ENST00000235532.9,ENST00000445843.7,ENST00000495222.5,ENST00000354267.3,ENST00000468441.5,ENST00000433045.6,ENST00000356637.9,ENST00000525869.1,ENST00000475160.1	nonsense_mediated_decay,processed_transcript,retained_intron,protein_coding	0.00105573	0.00238297	1.98675	-0.179161	0.00322828	0.00969372	0.0543065	-1.01577	1	1
ENSG00000116898	MRPS15	ENST00000477040.1,ENST00000488606.5,ENST00000373116.5,ENST00000462067.1	processed_transcript,protein_coding	0.00150078	0.00329909	-0.969489	5.10545	0.00111221	0.00366194	0.153132	5.6841	0.535599	1
ENSG00000119535	CSF3R	ENST00000533491.1,ENST00000526980.5,ENST00000331941.6,ENST00000466138.1,ENST00000487540.6,ENST00000373103.5,ENST00000489551.5,ENST00000464365.2,ENST00000480825.6,ENST00000373104.5,ENST00000464465.6,ENST00000469380.1,ENST00000484762.1,ENST00000373106.5,ENST00000361632.8	processed_transcript,retained_intron,protein_coding	2.385e-40	3.6051e-39	-5.06251	5.88815	2.74782e-51	2.40905e-49	-2.01869	6.25272	7.51918e-33	2.62679e-31
ENSG00000163873	GRIK3	ENST00000373093.4,ENST00000462621.1,ENST00000373091.7,ENST00000479620.1	processed_transcript,protein_coding	4.06882e-16	2.61188e-15	7.35878	-0.60819	1.3731e-06	7.02016e-06	-5.12548e-15	-3.2253	1	1
ENSG00000163874	ZC3H12A	ENST00000472312.1,ENST00000471012.1,ENST00000640233.1,ENST00000373087.6	nonsense_mediated_decay,retained_intron,protein_coding	2.00291e-74	5.67699e-73	4.95572	7.04512	1.49177e-56	1.62923e-54	0.623366	3.51462	0.0227333	0.0802853
ENSG00000163875	MEAF6	ENST00000485039.1,ENST00000475828.5,ENST00000296214.9,ENST00000373073.8,ENST00000487788.5,ENST00000448519.2,ENST00000373075.6,ENST00000487792.5,ENST00000373074.5	processed_transcript,protein_coding	1.37484e-08	5.24748e-08	-1.74599	5.17827	1.28035e-08	8.30385e-08	-0.388967	5.70961	0.0505627	0.160532
ENSG00000163877	SNIP1	ENST00000638725.1,ENST00000296215.7,ENST00000493916.1,ENST00000468040.2	nonsense_mediated_decay,retained_intron,protein_coding	0.70845	0.764343	0.487775	5.31213	0.0674555	0.145535	0.148848	5.23329	0.408014	0.850029
ENSG00000232273	FTH1P1	ENST00000437933.1	processed_pseudogene	0.160252	0.2309	3.9239	-2.4599	0.312854	0.479929	-5.12548e-15	-3.2253	1	1
ENSG00000237749	RP3-423B22.5	ENST00000423216.2	processed_pseudogene	0.536639	0.636228	0	-2.80372	1	1	3.15156	-2.90353	0.52202	0.980779
ENSG00000163879	DNALI1	ENST00000497858.1,ENST00000467277.1,ENST00000490312.1,ENST00000466723.1,ENST00000296218.7	processed_transcript,protein_coding	0.0985073	0.151034	2.83392	-2.07211	0.163023	0.305036	-2.34002	-3.05523	1	1
ENSG00000134697	GNL2	ENST00000462812.5,ENST00000479255.1,ENST00000490029.1,ENST00000373062.7,ENST00000538069.2,ENST00000488496.1,ENST00000489146.1,ENST00000463351.1,ENST00000469191.1	processed_transcript,protein_coding	0.137513	0.204064	0.641552	6.53726	0.068023	0.146513	0.428457	6.51854	0.0256066	0.0893189
ENSG00000169218	RSPO1	ENST00000356545.6,ENST00000401068.1,ENST00000615459.4,ENST00000612451.4	protein_coding	0.000110486	0.000283729	5.4085	-1.93821	0.021767	0.0540081	-5.12548e-15	-3.2253	1	1
ENSG00000116922	C1orf109	ENST00000464085.5,ENST00000609516.1,ENST00000494120.1,ENST00000358011.8,ENST00000498448.1,ENST00000472584.1,ENST00000619962.1,ENST00000488137.5,ENST00000491797.1,ENST00000486637.1,ENST00000464178.1,ENST00000491981.5,ENST00000461359.5,ENST00000477060.1	nonsense_mediated_decay,processed_transcript,protein_coding	0.19403	0.264887	-0.621169	4.85951	0.0237949	0.0585212	-0.499196	5.00541	0.0315599	0.107256
ENSG00000134690	CDCA8	ENST00000327331.2,ENST00000373055.5	protein_coding	3.44889e-07	1.1582e-06	-1.54735	5.60482	2.21456e-08	1.39941e-07	0.246643	6.40263	0.317388	0.695454
ENSG00000183317	EPHA10	ENST00000453577.1,ENST00000446149.6,ENST00000444950.1,ENST00000373048.8,ENST00000427468.6,ENST00000540011.2,ENST00000437645.5,ENST00000534097.5,ENST00000432874.7,ENST00000525749.1,ENST00000319637.6	nonsense_mediated_decay,processed_transcript,retained_intron,protein_coding	3.75747e-20	2.9521e-19	7.65928	-0.35634	2.33778e-08	1.47175e-07	-5.12548e-15	-3.2253	1	1
ENSG00000214141	ACTN4P2	ENST00000473049.1	processed_pseudogene	0.0128157	0.0239742	4.45737	-2.31361	0.190109	0.331684	-5.12548e-15	-3.2253	1	1
ENSG00000227416	RP11-109P14.2	ENST00000417484.1	processed_pseudogene	0.776051	0.81884	0	-2.80372	1	1	-5.12548e-15	-3.2253	1	1
ENSG00000185090	MANEAL	ENST00000397631.7,ENST00000329006.5,ENST00000525897.1,ENST00000373045.10,ENST00000532512.1	protein_coding	3.38226e-14	1.93861e-13	-2.45044	3.01894	7.39649e-12	6.70313e-11	0.317045	3.9635	0.304152	0.671881
ENSG00000196449	YRDC	ENST00000373044.2	protein_coding	5.59515e-05	0.000149466	1.32149	5.48324	5.57837e-05	0.000228827	0.34914	4.97771	0.163373	0.417382
ENSG00000197982	C1orf122	ENST00000373042.4,ENST00000373043.1,ENST00000419397.3,ENST00000468084.1	processed_transcript,protein_coding	1.16739e-61	2.67215e-60	3.96046	6.50678	2.22665e-36	9.2177e-35	0.136436	3.65113	0.647846	1
ENSG00000188786	MTF1	ENST00000373036.4,ENST00000468190.1	processed_transcript,protein_coding	5.98788e-06	1.78793e-05	-0.00877288	5.00079	0.980179	1	0.609682	5.44518	0.000947754	0.0046781
ENSG00000204084	INPP5B	ENST00000373021.1,ENST00000467066.1,ENST00000491406.2,ENST00000373026.5,ENST00000470364.5,ENST00000373024.7,ENST00000487328.1,ENST00000458109.6,ENST00000373023.6,ENST00000474758.1,ENST00000373027.5	processed_transcript,protein_coding	0.000144628	0.000366002	-1.33977	6.14894	1.96359e-06	9.84718e-06	-0.468976	6.5522	0.0130139	0.0493359
ENSG00000183431	SF3A3	ENST00000461869.5,ENST00000487062.1,ENST00000460925.1,ENST00000462258.1,ENST00000489537.5,ENST00000373019.4,ENST00000470585.5,ENST00000488934.1	processed_transcript,protein_coding	1.97681e-07	6.77571e-07	-1.7253	6.75097	4.59745e-06	2.19842e-05	0.211245	7.57924	0.289607	0.64505
ENSG00000183386	FHL3	ENST00000477194.5,ENST00000373016.3,ENST00000485803.5,ENST00000475084.5,ENST00000483132.1	processed_transcript,protein_coding	5.15131e-35	6.77804e-34	-1.9965	4.59974	7.15057e-08	4.25392e-07	-3.76489	4.4577	2.98511e-20	6.4196e-19
ENSG00000183520	UTP11	ENST00000483182.5,ENST00000373014.4,ENST00000488453.1,ENST00000486563.1	processed_transcript,protein_coding	0.320119	0.414075	-0.581795	5.38531	0.0419755	0.0959303	0.135378	5.81562	0.50382	0.980779
ENSG00000185668	POU3F1	ENST00000373012.4	protein_coding	8.13322e-08	2.896e-07	6.85314	-1.06634	0.000465523	0.00163808	-5.12548e-15	-3.2253	1	1
ENSG00000224592	RP5-884C9.2	ENST00000432922.5,ENST00000428151.1	lincRNA	0.0369144	0.0627395	4.4265	-2.31559	0.190109	0.331684	-5.12548e-15	-3.2253	1	1
ENSG00000237290	LINC01343	ENST00000431311.1	lincRNA	0.00454055	0.00929547	5.06943	-2.05945	0.102611	0.203504	-5.12548e-15	-3.2253	1	1
ENSG00000275350	RP11-329N22.2	ENST00000611376.1	processed_pseudogene	0.61423	0.680069	2.96192	-2.62475	1	1	-5.12548e-15	-3.2253	1	1
ENSG00000238063	LINC01685	ENST00000634464.1,ENST00000634732.1,ENST00000452971.1,ENST00000634298.1	lincRNA	0.160252	0.2309	3.9239	-2.4599	0.312854	0.479929	-5.12548e-15	-3.2253	1	1
ENSG00000215895	RP11-334L9.1	ENST00000442006.2	processed_pseudogene	0.0268773	0.0474786	1.12378	-2.20911	0.681087	0.942069	0.490048	-2.52492	1	1
ENSG00000116954	RRAGC	ENST00000493015.1,ENST00000373001.3,ENST00000496778.1,ENST00000474456.1	processed_transcript,retained_intron,protein_coding	1.45788e-09	6.03833e-09	-1.93449	3.51779	2.4805e-07	1.38822e-06	-0.502205	4.00544	0.0295758	0.101548
ENSG00000214114	MYCBP	ENST00000465771.3,ENST00000495043.5,ENST00000397572.4,ENST00000494695.4	processed_transcript,protein_coding	1.27431e-07	4.44784e-07	-2.60965	3.63228	2.11451e-15	2.54473e-14	0.60067	4.7895	0.0119273	0.0456546
ENSG00000174574	AKIRIN1	ENST00000372984.8,ENST00000432648.7,ENST00000531822.1,ENST00000446189.6	protein_coding	4.84917e-05	0.000130518	0.549867	6.51422	0.038088	0.0884102	1.03391	6.92807	6.43079e-11	7.56841e-10
ENSG00000168653	NDUFS5	ENST00000372969.7,ENST00000372967.3	protein_coding	0.000190495	0.000476088	0.487865	4.37234	0.138601	0.263814	0.488613	4.48304	0.211966	0.517582
ENSG00000127603	MACF1	ENST00000530275.2,ENST00000372925.6,ENST00000442046.5,ENST00000360115.8,ENST00000528611.1,ENST00000446276.5,ENST00000485063.1,ENST00000484393.1,ENST00000497964.1,ENST00000462103.1,ENST00000361689.6,ENST00000469366.1,ENST00000372915.7,ENST00000482035.2,ENST00000496360.5,ENST00000487656.1,ENST00000497807.1,ENST00000472385.1,ENST00000467673.5,ENST00000476350.1,ENST00000289893.8,ENST00000564288.5,ENS…	nonsense_mediated_decay,processed_transcript,retained_intron,protein_coding	7.55886e-17	5.06139e-16	0.132985	10.2461	0.657301	0.923216	-1.51629	9.71718	1.61117e-22	3.87068e-21
ENSG00000270040	RP11-416A14.1	ENST00000602528.1	sense_intronic	4.68097e-06	1.41259e-05	-2.85405	-1.00334	0.0273017	0.0659062	-6.36218	-1.41533	2.46432e-05	0.000158477
ENSG00000217897	HSPE1P8	ENST00000406997.2	processed_pseudogene	0.776051	0.81884	0	-2.80372	1	1	-5.12548e-15	-3.2253	1	1
ENSG00000183682	BMP8A	ENST00000331593.5	protein_coding	0.000476676	0.00113118	0.934564	-0.425489	0.239167	0.407983	-3.90838	-1.46821	0.000297582	0.00160394
ENSG00000237624	OXCT2P1	ENST00000447263.1	unprocessed_pseudogene	0.00682948	0.0135354	1.9927	-2.32677	0.681087	0.942069	-2.34027	-3.05521	1	1
ENSG00000243970	PPIEL	ENST00000427240.1	unprocessed_pseudogene	2.85787e-86	9.64683e-85	5.74578	4.02411	2.27102e-42	1.24884e-40	4.86741	3.33106	6.27591e-46	3.17266e-44
ENSG00000090621	PABPC4	ENST00000527718.1,ENST00000474378.1,ENST00000477556.1,ENST00000421687.6,ENST00000483770.1,ENST00000437136.5,ENST00000531243.2,ENST00000513632.2,ENST00000492468.5,ENST00000470443.5,ENST00000525045.5,ENST00000525669.5,ENST00000372862.7,ENST00000482028.5,ENST00000461578.1,ENST00000530186.1,ENST00000529216.1,ENST00000525751.5,ENST00000372856.7,ENST00000372857.7,ENST00000492519.1,ENST00000372858.7,ENS…	nonsense_mediated_decay,processed_transcript,retained_intron,protein_coding	2.34404e-21	1.94425e-20	2.12952	8.98548	6.10725e-13	6.08065e-12	0.242066	7.7933	0.121707	0.334131
ENSG00000163909	HEYL	ENST00000372852.3	protein_coding	8.5987e-36	1.15516e-34	-3.32399	1.31819	1.29194e-08	8.37054e-08	-9.24435	1.08067	2.43987e-24	6.36835e-23
ENSG00000116981	NT5C1A	ENST00000235628.1	protein_coding	2.13682e-05	5.99231e-05	5.81549	-1.72727	0.00526398	0.0151304	-5.12548e-15	-3.2253	1	1
ENSG00000116983	HPCAL4	ENST00000372844.7,ENST00000612703.3,ENST00000617690.2	protein_coding	0.00145006	0.00319639	5.52954	-1.83647	0.0669314	0.144502	-5.12548e-15	-3.2253	1	1
ENSG00000084072	PPIE	ENST00000475350.5,ENST00000467741.2,ENST00000324379.9,ENST00000485507.5,ENST00000497370.5,ENST00000470213.5,ENST00000372835.9,ENST00000482751.5,ENST00000372830.5,ENST00000356511.6,ENST00000474804.5,ENST00000495526.5,ENST00000480169.1,ENST00000456578.6,ENST00000470018.5	nonsense_mediated_decay,processed_transcript,retained_intron,protein_coding	8.22724e-06	2.41822e-05	-0.306666	5.1209	0.265278	0.447892	0.565677	5.67814	0.00567079	0.023515
ENSG00000225333	RP1-144F13.4	ENST00000497982.2	processed_pseudogene	0.808798	0.829111	0	-2.80372	1	1	-5.12548e-15	-3.2253	1	1
ENSG00000116985	BMP8B	ENST00000372827.7	protein_coding	8.42297e-99	3.27902e-97	7.03947	1.80869	8.62148e-18	1.24723e-16	8.02039	3.01302	2.79327e-48	1.52274e-46
ENSG00000198754	OXCT2	ENST00000327582.5	protein_coding	2.48041e-27	2.56871e-26	5.14276	-2.05548	0.0365982	0.0853851	7.89261	-0.143321	3.96955e-10	4.37868e-09
ENSG00000043514	TRIT1	ENST00000469476.2,ENST00000541099.5,ENST00000537440.5,ENST00000465417.5,ENST00000486825.6,ENST00000491865.5,ENST00000441669.6,ENST00000316891.9,ENST00000372818.5,ENST00000462243.2,ENST00000462797.5,ENST00000467774.1,ENST00000492612.6,ENST00000489945.5,ENST00000495175.6	nonsense_mediated_decay,processed_transcript,retained_intron,protein_coding	0.125787	0.188463	-0.549834	4.68984	0.0470486	0.106475	0.328377	5.20899	0.0690668	0.20979
ENSG00000116990	MYCL	ENST00000372815.1,ENST00000372816.2,ENST00000450953.3,ENST00000397332.2	protein_coding	1.29538e-256	4.34133e-254	13.9038	6.08765	5.03323e-81	2.33425e-78	6.00628	-1.64172	0.00926939	0.0364398
ENSG00000168389	MFSD2A	ENST00000459917.1,ENST00000480630.5,ENST00000434861.5,ENST00000491515.5,ENST00000483824.5,ENST00000420632.6,ENST00000481612.1,ENST00000469745.5,ENST00000372809.5,ENST00000372811.9	processed_transcript,protein_coding	1.79143e-68	4.61189e-67	4.33911	4.19914	3.31449e-38	1.48134e-36	3.46995	3.54138	2.1796e-26	6.19426e-25
ENSG00000228477	RP3-342P20.2	ENST00000438210.1	processed_pseudogene	9.56487e-16	6.00738e-15	2.93758	-0.0872451	6.58383e-06	3.08919e-05	2.84117	0.179302	1.04822e-05	7.12316e-05
ENSG00000131236	CAP1	ENST00000420216.5,ENST00000372798.5,ENST00000372792.6,ENST00000449311.5,ENST00000427843.5,ENST00000461993.1,ENST00000372797.7,ENST00000414281.5,ENST00000494114.1,ENST00000435719.5,ENST00000372802.5,ENST00000421589.5,ENST00000424977.1,ENST00000446031.1,ENST00000372805.7,ENST00000417287.5,ENST00000340450.7,ENST00000414893.5,ENST00000479759.5	processed_transcript,protein_coding	0.000116768	0.000299117	-0.716167	7.39557	0.00678519	0.0190244	0.359411	8.00486	0.12637	0.345184
ENSG00000131238	PPT1	ENST00000449045.6,ENST00000433473.7,ENST00000527311.6,ENST00000439754.5,ENST00000529905.5,ENST00000530076.5,ENST00000372775.2,ENST00000372779.8,ENST00000526547.1,ENST00000530704.5	nonsense_mediated_decay,processed_transcript,protein_coding	6.35642e-30	7.15964e-29	-3.99575	6.52299	1.0614e-36	4.43403e-35	-0.387233	7.34981	0.0390398	0.129071
ENSG00000226745	RP11-115D7.3	ENST00000430724.2	processed_pseudogene	0.60401	0.680069	3.00207	-2.62279	1	1	-5.12548e-15	-3.2253	1	1
ENSG00000117000	RLF	ENST00000372771.4	protein_coding	0.0544878	0.0883467	-0.116406	6.20938	0.704057	0.969693	-0.381876	6.19388	0.0567697	0.177077
ENSG00000188800	TMCO2	ENST00000372766.3,ENST00000468258.1	processed_transcript,protein_coding	0.565259	0.66712	0	-2.80372	1	1	3.6819	-2.7661	0.283029	0.635084
ENSG00000084073	ZMPSTE24	ENST00000472583.1,ENST00000479131.5,ENST00000474142.1,ENST00000372759.3	processed_transcript,retained_intron,protein_coding	0.000829435	0.0018968	-1.35887	5.38512	1.29975e-06	6.66858e-06	0.288607	6.15445	0.15647	0.408127
ENSG00000049089	COL9A2	ENST00000417105.5,ENST00000490132.1,ENST00000466267.1,ENST00000488463.5,ENST00000427563.1,ENST00000495948.1,ENST00000461118.5,ENST00000372748.7,ENST00000482722.5,ENST00000496215.5,ENST00000372736.3	processed_transcript,retained_intron,protein_coding	5.51905e-57	1.17427e-55	4.56143	2.30675	2.44323e-13	2.50829e-12	4.09286	2.12109	1.02483e-12	1.39077e-11
ENSG00000227311	RP1-228H13.1	ENST00000600955.1	processed_pseudogene	0.806252	0.829111	-1.93121	-2.63801	1	1	-2.34027	-3.05521	1	1
ENSG00000084070	SMAP2	ENST00000487871.1,ENST00000539317.2,ENST00000372708.5,ENST00000614549.4,ENST00000372718.7,ENST00000435168.6	processed_transcript,protein_coding	0.00252061	0.00537193	-0.58746	6.3332	0.0508766	0.11389	0.269652	6.8408	0.0756984	0.226138
ENSG00000187801	ZFP69B	ENST00000361584.4,ENST00000484445.5,ENST00000411995.6,ENST00000469416.1	retained_intron,protein_coding	0.731142	0.786532	0.685734	0.975219	0.143268	0.271905	0.834827	1.20559	0.0272213	0.0944261
ENSG00000187815	ZFP69	ENST00000372706.5,ENST00000482712.1,ENST00000372705.3	processed_transcript,protein_coding	1.11934e-73	3.12011e-72	-4.00174	2.55451	9.60217e-18	1.38223e-16	-6.96967	2.45626	8.45909e-42	3.80719e-40
ENSG00000164002	EXO5	ENST00000418186.1,ENST00000372703.1,ENST00000420209.1,ENST00000419161.1,ENST00000471429.1,ENST00000358527.6,ENST00000432259.5,ENST00000443729.5,ENST00000296380.8,ENST00000415550.5	processed_transcript,protein_coding	3.57402e-158	2.78948e-156	-8.06814	3.35114	8.82742e-38	3.86426e-36	-11.574	3.35972	7.02066e-70	6.03928e-68
ENSG00000117010	ZNF684	ENST00000372696.3,ENST00000472043.1,ENST00000493756.1,ENST00000372699.7,ENST00000372697.7,ENST00000465152.1	processed_transcript,protein_coding	0.0402868	0.0672497	-1.83421	1.94927	0.000111125	0.000434242	-0.323775	2.42098	0.328913	0.715564
ENSG00000236505	RP1-63P18.2	ENST00000414105.1	unprocessed_pseudogene	0.222005	0.298257	-1.93121	-2.63801	1	1	-2.34027	-3.05521	1	1
ENSG00000233910	GTF2F2P2	ENST00000445825.1	processed_pseudogene	0.174239	0.241276	3.8541	-2.46383	0.312854	0.479929	-5.12548e-15	-3.2253	1	1
ENSG00000117016	RIMS3	ENST00000372684.7,ENST00000372683.1	protein_coding	0.00134292	0.0029795	-0.985711	2.89371	0.0352528	0.0832416	-0.611548	3.08785	0.163304	0.417257
ENSG00000237899	RP4-739H11.3	ENST00000440100.1	lincRNA	0.0141364	0.0262576	1.5989	-1.87045	0.363503	0.549254	-0.571444	-2.52469	1	1
ENSG00000066136	NFYC	ENST00000496608.1,ENST00000534399.5,ENST00000440226.7,ENST00000372652.5,ENST00000425457.6,ENST00000467203.5,ENST00000308733.9,ENST00000447388.7,ENST00000488635.1,ENST00000372654.5,ENST00000483091.1,ENST00000525349.1,ENST00000414185.1,ENST00000427410.6,ENST00000372653.5,ENST00000424419.6,ENST00000456393.6,ENST00000372651.5,ENST00000416859.6,ENST00000453631.5,ENST00000372669.8,ENST00000531464.5,ENS…	processed_transcript,retained_intron,protein_coding	8.04073e-08	2.86498e-07	0.388281	5.39021	0.136343	0.260244	0.74856	5.71274	1.46394e-05	9.73928e-05
ENSG00000117013	KCNQ4	ENST00000347132.9,ENST00000443478.3,ENST00000509682.6,ENST00000506017.1	processed_transcript,protein_coding	2.00285e-24	1.8762e-23	4.06004	0.863867	4.06947e-07	2.22224e-06	3.37826	0.62486	3.55835e-08	3.245e-07
ENSG00000179862	CITED4	ENST00000372638.3	protein_coding	3.50719e-177	3.42165e-175	11.4039	6.31871	7.39366e-51	6.34308e-49	7.39314	2.40005	6.41349e-35	2.38641e-33
ENSG00000228940	RP11-348A7.1	ENST00000413739.1	unprocessed_pseudogene	0.49187	0.590369	2.96192	-2.62475	1	1	-5.12548e-15	-3.2253	1	1
ENSG00000233118	UBE2V1P8	ENST00000437166.2	processed_pseudogene	0.797688	0.829111	0	-2.80372	1	1	-5.12548e-15	-3.2253	1	1
ENSG00000171793	CTPS1	ENST00000497210.5,ENST00000372621.8,ENST00000479480.5,ENST00000498694.1,ENST00000470271.5,ENST00000372616.1,ENST00000480420.5,ENST00000463423.5,ENST00000463285.5,ENST00000464283.5,ENST00000475060.1,ENST00000486889.1	processed_transcript,protein_coding	0.0920508	0.141937	0.481911	6.8225	0.0643987	0.139637	0.436774	6.90403	0.0870714	0.253207
ENSG00000171790	SLFNL1	ENST00000439569.2,ENST00000372613.6,ENST00000372611.5,ENST00000359345.5,ENST00000302946.12	protein_coding	1.29559e-05	3.72596e-05	1.03692	-0.0264365	0.128205	0.245944	0.572564	-0.118494	0.352542	0.756856
ENSG00000010803	SCMH1	ENST00000397174.6,ENST00000397171.6,ENST00000456518.3,ENST00000372595.5,ENST00000337495.9,ENST00000498793.5,ENST00000361191.9,ENST00000472037.5,ENST00000402904.6,ENST00000482530.1,ENST00000361705.7,ENST00000326197.11,ENST00000372596.5,ENST00000372597.5,ENST00000488592.1,ENST00000460215.5,ENST00000489421.1	processed_transcript,retained_intron,protein_coding	0.00135756	0.00300928	-0.888029	5.72766	0.00103297	0.00341866	0.164776	6.28767	0.313979	0.689791
ENSG00000215893	RPL23AP17	ENST00000401064.3	processed_pseudogene	0.797688	0.829111	0	-2.80372	1	1	-5.12548e-15	-3.2253	1	1
ENSG00000235358	RP11-399E6.1	ENST00000425554.1,ENST00000422305.1,ENST00000445073.1	lincRNA	0.00363877	0.00757436	1.26261	0.808464	0.0131565	0.0345428	-1.14279	-0.135024	0.0551031	0.172568
ENSG00000204060	FOXO6	ENST00000372591.1	protein_coding	1.96206e-14	1.14094e-13	6.44676	1.18424	1.39242e-14	1.57949e-13	3.83683	-0.803999	0.0105657	0.0408831
ENSG00000127129	EDN2	ENST00000460255.1,ENST00000467046.5,ENST00000490783.5,ENST00000372587.4,ENST00000467872.5	processed_transcript,protein_coding	1.60699e-06	5.07338e-06	5.96228	-1.63389	0.00296704	0.00898508	-5.12548e-15	-3.2253	1	1
ENSG00000127124	HIVEP3	ENST00000479350.1,ENST00000491442.5,ENST00000372584.5,ENST00000372583.5,ENST00000460604.1,ENST00000489103.5	processed_transcript,protein_coding	3.60399e-88	1.24367e-86	5.64058	6.17426	6.3055e-61	8.77287e-59	2.26524	3.17737	6.83491e-13	9.41123e-12
ENSG00000230638	RP11-486B10.4	ENST00000434240.2	processed_pseudogene	0.00132882	0.00294986	5.19346	-2.05149	0.0585427	0.128586	-5.12548e-15	-3.2253	1	1
ENSG00000227538	HNRNPFP1	ENST00000391730.2	processed_pseudogene	0.60401	0.680069	3.00207	-2.62279	1	1	-5.12548e-15	-3.2253	1	1
ENSG00000197273	GUCA2A	ENST00000357001.2	protein_coding	0.174239	0.241276	3.8541	-2.46383	0.312854	0.479929	-5.12548e-15	-3.2253	1	1
ENSG00000198815	FOXJ3	ENST00000545068.5,ENST00000372572.5,ENST00000372573.5,ENST00000361776.5,ENST00000422278.1,ENST00000454417.1,ENST00000372571.5,ENST00000361346.5,ENST00000445886.5	protein_coding	0.738155	0.793129	-0.0423438	6.73566	0.887565	1	0.439286	7.09828	0.00394578	0.0170306
ENSG00000177181	RIMKLA	ENST00000431473.3,ENST00000410070.6	protein_coding	3.61829e-30	4.11315e-29	7.95443	-0.0713947	6.52083e-10	4.83584e-09	8.3218	0.242656	2.30954e-16	3.99272e-15
ENSG00000235002	RP11-157D18.2	ENST00000411908.1	processed_pseudogene	0.797688	0.829111	0	-2.80372	1	1	-5.12548e-15	-3.2253	1	1
ENSG00000066185	ZMYND12	ENST00000372565.7,ENST00000475426.1,ENST00000611861.4,ENST00000461083.1	nonsense_mediated_decay,retained_intron,protein_coding	9.97232e-20	7.68395e-19	3.82701	0.497023	7.16383e-10	5.2894e-09	3.04396	0.194279	1.35363e-06	1.02962e-05
ENSG00000127125	PPCS	ENST00000469615.1,ENST00000372562.1,ENST00000372556.3,ENST00000372561.3,ENST00000482168.1,ENST00000471420.1,ENST00000372560.3,ENST00000472013.1	processed_transcript,protein_coding	0.180382	0.248599	0.0379676	4.66958	0.892527	1	0.330175	4.92847	0.0678779	0.206689
ENSG00000186409	CCDC30	ENST00000471390.5,ENST00000514642.1,ENST00000342022.8,ENST00000492422.1,ENST00000495044.5,ENST00000471699.1,ENST00000477155.5,ENST00000428554.6,ENST00000507855.5,ENST00000340612.4,ENST00000475614.6,ENST00000462063.1,ENST00000509712.5,ENST00000468651.1	nonsense_mediated_decay,processed_transcript,retained_intron,protein_coding	0.00247091	0.00527268	0.594951	2.59723	0.0862097	0.176478	-0.331683	2.24303	0.447855	0.912128
ENSG00000230116	RP11-163G10.2	ENST00000426743.1	processed_pseudogene	0.144921	0.213836	-3.61508	-2.23477	0.312854	0.479929	-4.10907	-2.63973	0.158698	0.408127
ENSG00000236876	TMSB4XP1	ENST00000424567.1	processed_pseudogene	0.0470269	0.0773106	0	-2.80372	1	1	-5.12548e-15	-3.2253	1	1
ENSG00000236180	RP11-163G10.4	ENST00000454425.2	processed_pseudogene	0.200591	0.272715	-1.93442	-2.63768	1	1	1.72143	-2.52553	0.513719	0.980779
ENSG00000171960	PPIH	ENST00000461351.1,ENST00000436387.1,ENST00000372550.5,ENST00000440068.5,ENST00000304979.7,ENST00000372549.1	nonsense_mediated_decay,protein_coding	0.000140767	0.00035689	-0.770448	5.29899	0.0210388	0.052634	0.453686	5.97535	0.0887814	0.257641
ENSG00000234917	RP5-994D16.3	ENST00000414339.2	lincRNA	0.00448457	0.00920679	-2.33673	-0.281292	0.0100414	0.0270043	-0.00914796	0.183806	1	1
ENSG00000065978	YBX1	ENST00000467957.1,ENST00000332220.10,ENST00000436427.1,ENST00000321358.11	processed_transcript,protein_coding	0.00166481	0.0036401	0.955502	9.96574	0.000697923	0.00237895	0.362545	9.70855	0.148081	0.393866
ENSG00000164007	CLDN19	ENST00000296387.5,ENST00000539749.5,ENST00000372539.3	protein_coding	1.32848e-13	7.31947e-13	5.17729	-0.780157	2.86042e-06	1.4041e-05	-2.34027	-3.05521	1	1
ENSG00000117385	P3H1	ENST00000481465.3,ENST00000472802.1,ENST00000431412.3,ENST00000495874.5,ENST00000296388.9,ENST00000492956.1,ENST00000372526.2,ENST00000462474.5,ENST00000236040.8,ENST00000463465.1,ENST00000460831.1,ENST00000447502.2,ENST00000397054.7,ENST00000460031.5	nonsense_mediated_decay,processed_transcript,retained_intron,protein_coding	8.54831e-06	2.5089e-05	1.29697	6.5714	7.30737e-06	3.40273e-05	0.0182678	5.90263	0.916022	1
ENSG00000164008	C1orf50	ENST00000468913.2,ENST00000372525.5,ENST00000494155.1	processed_transcript,retained_intron,protein_coding	0.425105	0.526629	-0.404007	1.37365	0.412858	0.616398	-0.496555	1.38353	0.238863	0.571143
ENSG00000283580	RP5-994D16.12	ENST00000464081.1,ENST00000603943.5	nonsense_mediated_decay	0.0974196	0.149476	3.88882	-2.46187	0.312854	0.479929	-5.12548e-15	-3.2253	1	1
ENSG00000274386	TMEM269	ENST00000421630.6,ENST00000637012.1,ENST00000605272.1,ENST00000536543.5	nonsense_mediated_decay,processed_transcript,protein_coding	0.152693	0.223952	-0.269385	0.278784	0.742048	1	-0.405065	0.235309	0.350664	0.753813
ENSG00000177868	SVBP	ENST00000497437.1,ENST00000372522.5,ENST00000372521.8	processed_transcript,protein_coding	0.0108474	0.0205225	-1.21153	2.70275	0.00133431	0.00431684	-0.586783	2.96604	0.0340393	0.114394
ENSG00000164010	ERMAP	ENST00000372514.7,ENST00000470938.1,ENST00000487556.5,ENST00000328249.3,ENST00000372517.6	processed_transcript,protein_coding	0.270257	0.355455	-0.371905	3.48354	0.251027	0.426079	-0.148995	3.67339	0.506948	0.980779
ENSG00000164011	ZNF691	ENST00000372507.5,ENST00000630961.1,ENST00000372504.5,ENST00000372503.2,ENST00000372502.5,ENST00000397034.3,ENST00000372506.5,ENST00000372508.7	protein_coding	9.07677e-08	3.21729e-07	-2.47258	3.28529	3.19433e-07	1.76391e-06	-0.225736	3.97241	0.283281	0.635471
ENSG00000237090	RP11-342M1.6	ENST00000417517.1	processed_pseudogene	0.194963	0.266054	3.8541	-2.46383	0.312854	0.479929	2.30487	-3.05545	1	1
ENSG00000225099	ATP6V1E1P1	ENST00000439215.1	processed_pseudogene	0.450553	0.552424	0	-2.80372	1	1	-5.12548e-15	-3.2253	1	1
ENSG00000117394	SLC2A1	ENST00000630821.1,ENST00000415851.6,ENST00000372500.4,ENST00000426263.7,ENST00000630287.2,ENST00000460369.3,ENST00000475162.3,ENST00000625233.2,ENST00000629908.1	nonsense_mediated_decay,retained_intron,protein_coding	1.26073e-09	5.25238e-09	1.4824	6.59074	7.71406e-08	4.57214e-07	0.0650529	5.81262	0.735407	1
ENSG00000284138	RP5-848E13.5	ENST00000639582.1	processed_pseudogene	0.000625719	0.00146164	1.94999	-0.0241781	0.00278256	0.00848907	-0.708907	-1.13706	0.399009	0.837099
ENSG00000227533	SLC2A1-AS1	ENST00000431759.5,ENST00000416689.1	lincRNA,retained_intron	1.10091e-09	4.6172e-09	3.86771	-0.112444	8.54965e-06	3.9337e-05	-0.735035	-2.22503	0.761894	1
ENSG00000283973	RP5-848E13.4	ENST00000640492.1,ENST00000640236.1	lincRNA	1.87e-06	5.8661e-06	6.08482	-1.54566	0.00547945	0.0156752	-5.12548e-15	-3.2253	1	1
ENSG00000186973	FAM183A	ENST00000410025.5,ENST00000409337.5,ENST00000481753.1,ENST00000335282.4,ENST00000410048.5,ENST00000409396.5	nonsense_mediated_decay,processed_transcript,retained_intron,protein_coding	0.174239	0.241276	3.8541	-2.46383	0.312854	0.479929	-5.12548e-15	-3.2253	1	1
ENSG00000117395	EBNA1BP2	ENST00000472982.5,ENST00000236051.2,ENST00000483082.1,ENST00000431635.6,ENST00000491223.5,ENST00000466927.5,ENST00000474566.1,ENST00000463906.1,ENST00000461557.2	processed_transcript,protein_coding	0.000580973	0.00136359	-0.578452	5.3776	0.0436678	0.0994287	0.480275	5.99658	0.205392	0.504842
ENSG00000243710	CFAP57	ENST00000534615.1,ENST00000428122.1,ENST00000610710.4,ENST00000525227.5,ENST00000372492.8,ENST00000529956.5,ENST00000528956.5,ENST00000533339.1	nonsense_mediated_decay,retained_intron,protein_coding	8.40891e-05	0.000219805	5.13621	-0.788254	0.000107367	0.000420273	1.72076	-2.52551	0.51377	0.980779
ENSG00000179178	TMEM125	ENST00000439858.5,ENST00000442284.1,ENST00000456751.1,ENST00000432792.6	processed_transcript,protein_coding	0.167214	0.238398	3.88882	-2.46187	0.312854	0.479929	-5.12548e-15	-3.2253	1	1
ENSG00000253313	C1orf210	ENST00000423420.1,ENST00000523677.5	protein_coding	0.797688	0.829111	0	-2.80372	1	1	-5.12548e-15	-3.2253	1	1
ENSG00000066056	TIE1	ENST00000492599.1,ENST00000473014.1,ENST00000538015.1,ENST00000485125.1,ENST00000480269.1,ENST00000492874.1,ENST00000471187.1,ENST00000461061.1,ENST00000372476.7,ENST00000488437.1	processed_transcript,protein_coding	2.59364e-147	1.76965e-145	-4.50668	4.50122	3.70154e-23	7.51106e-22	-9.57138	4.50284	9.57901e-110	1.58004e-107
ENSG00000117400	MPL	ENST00000372470.8,ENST00000413998.7,ENST00000638732.1	retained_intron,protein_coding	5.469e-74	1.53651e-72	-5.20147	2.45537	9.08179e-19	1.40667e-17	-10.5781	2.3758	8.15622e-41	3.55584e-39
ENSG00000117399	CDC20	ENST00000482046.1,ENST00000478882.1,ENST00000372462.1,ENST00000310955.10	processed_transcript,protein_coding	1.52156e-08	5.78335e-08	-0.704602	6.46095	0.0280461	0.0675861	0.253442	7.00543	0.478884	0.963914
ENSG00000066322	ELOVL1	ENST00000465321.5,ENST00000496932.1,ENST00000372458.7,ENST00000470968.6,ENST00000479439.5,ENST00000479686.5,ENST00000497050.5,ENST00000413844.3,ENST00000621943.4,ENST00000497569.5,ENST00000482302.5,ENST00000487209.5,ENST00000470769.5,ENST00000478481.5,ENST00000468865.6,ENST00000464204.5	processed_transcript,protein_coding	9.03794e-07	2.92283e-06	-0.515242	5.25748	0.0612905	0.133932	0.732352	6.00342	0.000257995	0.00140573
ENSG00000159479	MED8	ENST00000372455.4,ENST00000290663.10,ENST00000460803.1,ENST00000372457.8,ENST00000473560.1	retained_intron,protein_coding	0.212706	0.287162	0.348534	5.15065	0.203517	0.352601	-0.0464813	5.05036	0.830532	1
ENSG00000198198	SZT2	ENST00000471177.1,ENST00000406439.7,ENST00000634258.2,ENST00000460536.1,ENST00000638642.1,ENST00000470897.2,ENST00000638769.1,ENST00000639197.1,ENST00000478140.1,ENST00000562955.2,ENST00000638631.1,ENST00000372450.8,ENST00000357658.4,ENST00000638263.1,ENST00000640484.1,ENST00000639852.1,ENST00000470139.1	nonsense_mediated_decay,processed_transcript,retained_intron,protein_coding	9.85992e-08	3.4833e-07	1.56195	7.68967	6.00317e-07	3.2194e-06	-0.00896083	6.81225	0.956343	1
ENSG00000178922	HYI	ENST00000372432.5,ENST00000372433.5,ENST00000470662.5,ENST00000372434.5,ENST00000496142.1,ENST00000372430.7,ENST00000583037.5,ENST00000372427.5,ENST00000372425.8,ENST00000469587.1,ENST00000486909.1,ENST00000483618.1,ENST00000487366.5	retained_intron,protein_coding	5.20548e-21	4.24937e-20	2.97971	0.443402	7.66571e-08	4.54517e-07	3.11367	0.88577	1.30749e-11	1.63181e-10
ENSG00000142949	PTPRF	ENST00000372407.4,ENST00000496043.5,ENST00000359947.8,ENST00000481019.5,ENST00000437607.1,ENST00000412568.6,ENST00000463041.1,ENST00000438120.5,ENST00000477970.1,ENST00000496447.5,ENST00000617451.4,ENST00000414879.5,ENST00000429895.5,ENST00000372405.1,ENST00000436724.5,ENST00000467464.1	processed_transcript,protein_coding	8.68275e-10	3.67718e-09	2.06044	2.25106	7.58486e-07	4.01315e-06	2.17126	2.53998	2.13266e-05	0.000138625
ENSG00000066135	KDM4A	ENST00000481296.1,ENST00000463151.5,ENST00000372396.3,ENST00000472265.1,ENST00000485249.1	processed_transcript,protein_coding	0.107079	0.162835	-0.361065	6.59168	0.161607	0.30306	0.0391746	6.88489	0.810634	1
ENSG00000126091	ST3GAL3	ENST00000490541.5,ENST00000361392.8,ENST00000531816.1,ENST00000351035.7,ENST00000372374.6,ENST00000531451.5,ENST00000353126.7,ENST00000531993.5,ENST00000461375.1,ENST00000545417.5,ENST00000330208.6,ENST00000532911.5,ENST00000372372.6,ENST00000372367.5,ENST00000528371.5,ENST00000495482.1,ENST00000372368.6,ENST00000469715.5,ENST00000530154.5,ENST00000372366.5,ENST00000489897.5,ENST00000479383.5,ENS…	nonsense_mediated_decay,processed_transcript,retained_intron,protein_coding	1.78862e-23	1.61958e-22	1.45644	5.24918	3.33597e-08	2.06642e-07	1.87279	5.68223	3.82494e-28	1.15798e-26
ENSG00000233674	RP11-184I16.3	ENST00000427515.2	processed_pseudogene	0.00791589	0.0154297	-2.26159	-1.38328	0.124803	0.239977	1.04491	-0.612833	0.152338	0.402976
ENSG00000224751	SHMT1P1	ENST00000419974.2	processed_pseudogene	0.00669673	0.0132946	4.86874	-2.17746	0.0791691	0.163057	-5.12548e-15	-3.2253	1	1
ENSG00000117407	ARTN	ENST00000474592.1,ENST00000477048.5,ENST00000372359.9,ENST00000479128.5,ENST00000414809.7,ENST00000472435.1,ENST00000491846.5,ENST00000372354.3,ENST00000498139.6,ENST00000471394.6,ENST00000438616.3	protein_coding	0.0047053	0.00961615	1.7299	-0.166223	0.0148376	0.0385642	0.703127	-0.553534	0.362109	0.773267
ENSG00000117408	IPO13	ENST00000492152.5,ENST00000489773.5,ENST00000372339.3,ENST00000486876.1,ENST00000480902.1,ENST00000489061.1,ENST00000372343.7	processed_transcript,protein_coding	0.745212	0.800174	0.572291	5.50272	0.0418449	0.0956591	0.0619458	5.32946	0.768109	1
ENSG00000132768	DPH2	ENST00000534655.1,ENST00000255108.7,ENST00000530988.1,ENST00000459879.1,ENST00000490861.5,ENST00000527319.1,ENST00000534786.1,ENST00000532140.1,ENST00000477294.5,ENST00000527567.1,ENST00000471934.1,ENST00000495421.1,ENST00000529729.1,ENST00000396758.6,ENST00000476260.1,ENST00000524776.5,ENST00000492306.5	nonsense_mediated_decay,processed_transcript,retained_intron,protein_coding	7.7037e-12	3.79026e-11	1.0602	5.73643	5.54079e-05	0.000227373	1.24846	5.97869	1.52713e-07	1.29968e-06
ENSG00000117410	ATP6V0B	ENST00000236067.8,ENST00000496131.1,ENST00000473485.5,ENST00000471859.6,ENST00000472505.6,ENST00000498208.1,ENST00000468183.5,ENST00000472174.6,ENST00000532072.1,ENST00000472277.5,ENST00000498664.1,ENST00000532642.5,ENST00000461670.5	nonsense_mediated_decay,processed_transcript,retained_intron,protein_coding	2.47883e-08	9.25369e-08	0.381632	6.65067	0.169273	0.31579	0.947389	7.10455	5.59229e-07	4.4549e-06
ENSG00000117411	B4GALT2	ENST00000434555.6,ENST00000498543.1,ENST00000497866.5,ENST00000356836.10,ENST00000485678.5,ENST00000372324.5,ENST00000481924.1,ENST00000309519.8	processed_transcript,protein_coding	0.000143918	0.00036435	0.453866	4.9097	0.173271	0.322141	1.00359	5.36208	7.77092e-07	6.08589e-06
ENSG00000159214	CCDC24	ENST00000486504.5,ENST00000472562.1,ENST00000490064.5,ENST00000486064.5,ENST00000463846.5,ENST00000372318.7,ENST00000466180.1,ENST00000460543.5,ENST00000490563.5,ENST00000479055.5,ENST00000485811.5	nonsense_mediated_decay,processed_transcript,retained_intron,protein_coding	2.55462e-08	9.52438e-08	3.01385	2.27835	3.23391e-09	2.238e-08	0.0430606	0.431826	1	1
ENSG00000196517	SLC6A9	ENST00000489764.1,ENST00000372306.7,ENST00000372310.7,ENST00000372307.7,ENST00000466926.1,ENST00000360584.6,ENST00000533007.1,ENST00000357730.6,ENST00000528803.1,ENST00000492434.6,ENST00000475075.6	processed_transcript,retained_intron,protein_coding	3.35967e-08	1.24145e-07	3.80022	0.0631201	1.79645e-05	7.90189e-05	-0.30131	-1.97747	1	1
ENSG00000230615	RP5-1198O20.4	ENST00000609472.5,ENST00000431800.1,ENST00000626430.1,ENST00000624869.1,ENST00000627999.1,ENST00000628123.1,ENST00000437643.1,ENST00000616338.1,ENST00000610167.5,ENST00000453688.5,ENST00000630871.2,ENST00000447959.1,ENST00000625367.2,ENST00000630008.2,ENST00000609027.1,ENST00000627824.2,ENST00000625982.1,ENST00000434244.5,ENST00000626342.1,ENST00000609636.5,ENST00000607988.5,ENST00000623351.1,ENS…	lincRNA	4.54103e-28	4.80691e-27	2.94476	1.91859	1.29419e-06	6.64218e-06	-7.24173	-0.728988	2.1881e-09	2.25868e-08
ENSG00000271647	KRT8P47	ENST00000604727.1	processed_pseudogene	0.0369144	0.0627395	4.4265	-2.31559	0.190109	0.331684	-5.12548e-15	-3.2253	1	1
ENSG00000171872	KLF17	ENST00000476802.1,ENST00000372299.3	nonsense_mediated_decay,protein_coding	0.123861	0.185908	1.1613	-2.20747	0.681087	0.942069	-3.19038	-2.90305	0.52202	0.980779
ENSG00000233514	RP11-570P14.1	ENST00000402743.2	processed_pseudogene	0.483878	0.583622	1.19028	-1.98038	0.726554	0.996132	0.344011	-2.31864	1	1
ENSG00000283039	KLF18	ENST00000634670.1	protein_coding	2.238e-06	6.96655e-06	5.80151	-1.72928	0.0057266	0.0162543	-5.12548e-15	-3.2253	1	1
ENSG00000271329	RP5-891H21.5	ENST00000603887.1	processed_pseudogene	0.460153	0.560159	2.96192	-2.62475	1	1	2.30325	-3.05558	1	1
ENSG00000178028	DMAP1	ENST00000463950.1,ENST00000315913.9,ENST00000361745.10,ENST00000372290.4,ENST00000436069.5,ENST00000494092.1,ENST00000483741.1,ENST00000440641.5,ENST00000437511.5,ENST00000446292.5,ENST00000372289.6,ENST00000471829.5,ENST00000487922.5,ENST00000475794.5,ENST00000488433.5	processed_transcript,protein_coding	0.737643	0.792658	-0.108258	4.90714	0.704617	0.97038	0.0222924	5.07418	0.912287	1
ENSG00000117419	ERI3	ENST00000479101.1,ENST00000457571.1,ENST00000372259.9,ENST00000462341.1,ENST00000495828.1,ENST00000489710.1,ENST00000456170.5,ENST00000452396.5,ENST00000372257.6	processed_transcript,protein_coding	0.0241391	0.0429736	-0.22597	5.41949	0.407878	0.60991	0.374657	5.8303	0.0652074	0.199793
ENSG00000233602	ERI3-IT1	ENST00000414156.1	sense_intronic	0.122045	0.183406	-1.23998	0.102809	0.0680379	0.146525	0.624774	0.794277	0.174255	0.440073
ENSG00000187147	RNF220	ENST00000487332.1,ENST00000480686.5,ENST00000474064.5,ENST00000355387.6,ENST00000474956.1,ENST00000335497.11,ENST00000453863.5,ENST00000440132.2,ENST00000361799.6,ENST00000470498.1,ENST00000475378.5,ENST00000488865.2,ENST00000497469.5,ENST00000484745.5,ENST00000372247.6,ENST00000496262.1,ENST00000474394.5,ENST00000471494.5	nonsense_mediated_decay,processed_transcript,protein_coding	2.96031e-13	1.5972e-12	-1.50197	6.7858	1.95614e-08	1.24323e-07	-0.800871	7.10508	3.3143e-07	2.71337e-06
ENSG00000126106	TMEM53	ENST00000372237.7,ENST00000495630.1,ENST00000372242.7,ENST00000476724.1,ENST00000372243.7,ENST00000468117.1,ENST00000372244.3,ENST00000372235.7,ENST00000420706.1	processed_transcript,protein_coding	9.43417e-40	1.39443e-38	3.35302	-0.508419	5.60478e-05	0.000229822	5.68066	1.94219	5.55503e-20	1.16871e-18
ENSG00000198520	C1orf228	ENST00000446792.1,ENST00000434520.5,ENST00000434068.1,ENST00000444751.5,ENST00000427321.1,ENST00000455805.5,ENST00000453711.1,ENST00000418644.5,ENST00000441519.5,ENST00000444525.1,ENST00000357508.5,ENST00000418779.5,ENST00000427336.1,ENST00000440383.1,ENST00000421398.5,ENST00000535358.5,ENST00000424484.5,ENST00000445071.5,ENST00000458657.6,ENST00000568406.1	nonsense_mediated_decay,processed_transcript,retained_intron,protein_coding	6.1494e-19	4.5678e-18	2.19444	6.51385	2.32019e-08	1.46211e-07	1.70104	6.23786	2.26614e-13	3.2388e-12
ENSG00000142945	KIF2C	ENST00000480574.1,ENST00000455186.5,ENST00000493027.5,ENST00000372224.8,ENST00000472235.1,ENST00000452259.5,ENST00000372217.5,ENST00000423289.1	processed_transcript,protein_coding	1.10618e-11	5.37306e-11	-2.15142	6.39118	8.73344e-15	1.00493e-13	-0.383904	7.01678	0.0742874	0.222522
ENSG00000142937	RPS8	ENST00000474582.1,ENST00000484599.1,ENST00000485390.5,ENST00000470475.1,ENST00000372209.3,ENST00000497035.5,ENST00000396651.7,ENST00000464658.1	processed_transcript,protein_coding	5.00449e-09	1.98566e-08	1.10149	10.3515	4.77202e-05	0.000197324	0.661494	10.173	3.22497e-05	0.000203468
ENSG00000234093	RPS15AP11	ENST00000594193.1	processed_pseudogene	0.338773	0.435826	1.12378	-2.20911	0.681087	0.942069	-0.038591	-2.6402	1	1
ENSG00000142959	BEST4	ENST00000372207.3	protein_coding	0.0002539	0.000624889	3.86967	-1.64658	0.00564636	0.0160937	-0.0370231	-2.90342	1	1
ENSG00000173846	PLK3	ENST00000461358.5,ENST00000476731.1,ENST00000465443.5,ENST00000461769.1,ENST00000492398.5,ENST00000493100.1,ENST00000372201.4	processed_transcript,protein_coding	8.07887e-190	9.61056e-188	6.20536	8.16306	7.23696e-59	9.011e-57	0.0827886	3.10546	0.767586	1
ENSG00000188396	TCTEX1D4	ENST00000339355.2	protein_coding	2.42701e-09	9.88503e-09	3.9475	-0.637371	2.48633e-05	0.000106925	-1.41625	-2.64	0.656024	1
ENSG00000222009	BTBD19	ENST00000495433.1,ENST00000464114.1,ENST00000409335.6,ENST00000450269.5,ENST00000489976.1,ENST00000485668.5,ENST00000482715.5,ENST00000439563.2,ENST00000475105.5	nonsense_mediated_decay,processed_transcript,retained_intron,protein_coding	3.22326e-40	4.85157e-39	4.455	3.33125	6.45053e-32	2.10415e-30	1.08086	0.712674	0.0579661	0.180299
ENSG00000117425	PTCH2	ENST00000447098.6,ENST00000372192.3,ENST00000438067.5	protein_coding	1.04064e-38	1.49867e-37	4.20226	4.11515	3.11045e-13	3.16485e-12	-0.281958	0.915515	0.561238	1
ENSG00000226499	RP5-882O7.1	ENST00000447970.1	processed_pseudogene	0.0848325	0.131836	1.00573	-0.460389	0.15544	0.292782	-0.131892	-0.867882	1	1
ENSG00000070785	EIF2B3	ENST00000372182.6,ENST00000372183.7,ENST00000360403.6,ENST00000497010.1,ENST00000477953.5,ENST00000439363.5,ENST00000620860.4,ENST00000480675.5,ENST00000487532.5,ENST00000486491.1	nonsense_mediated_decay,processed_transcript,protein_coding	0.274122	0.360153	-0.264133	4.91033	0.308417	0.479929	0.20346	5.2423	0.414552	0.860456
ENSG00000268949	MRPS17P1	ENST00000596009.1	processed_pseudogene	0.779382	0.81884	0	-2.80372	1	1	-5.12548e-15	-3.2253	1	1
ENSG00000126107	HECTD3	ENST00000487488.5,ENST00000372172.4,ENST00000372168.7,ENST00000484564.1,ENST00000486296.5,ENST00000466423.5,ENST00000486132.5	processed_transcript,protein_coding	0.102591	0.156695	-0.211956	5.6907	0.481414	0.706371	-0.557584	5.6451	0.00112005	0.0054487
ENSG00000126088	UROD	ENST00000478467.5,ENST00000460334.5,ENST00000491300.5,ENST00000490385.5,ENST00000636836.1,ENST00000473012.1,ENST00000486699.5,ENST00000636293.1,ENST00000465678.1,ENST00000494399.5,ENST00000463092.5,ENST00000428106.1,ENST00000460906.5,ENST00000246337.8,ENST00000462688.5,ENST00000461035.5,ENST00000472254.1,ENST00000496439.1,ENST00000434478.5,ENST00000466193.1,ENST00000491773.5,ENST00000469548.5	processed_transcript,protein_coding	3.57309e-08	1.31681e-07	0.486639	6.59245	0.0701038	0.15067	-1.40536	5.90033	1.34975e-11	1.68193e-10
ENSG00000162415	ZSWIM5	ENST00000359600.5,ENST00000464588.1	processed_transcript,protein_coding	1.417e-35	1.89012e-34	9.22748	1.21651	2.19074e-15	2.63088e-14	6.51753	-1.27382	3.33811e-06	2.41564e-05
ENSG00000234315	OSTCP5	ENST00000425293.1	processed_pseudogene	0.0195039	0.0352932	-4.16655	-2.01884	0.201018	0.348798	-2.35996	-2.31766	0.212324	0.518179
ENSG00000281912	LINC01144	ENST00000626198.1	lincRNA	1.60175e-22	1.39245e-21	3.50409	2.07978	2.792e-14	3.10437e-13	-0.201636	-0.247881	0.834033	1
ENSG00000186603	HPDL	ENST00000334815.4	protein_coding	4.46176e-180	4.59088e-178	10.5317	2.6151	9.78097e-27	2.43762e-25	12.7272	4.51018	8.40664e-67	6.86256e-65
ENSG00000132781	MUTYH	ENST00000372098.7,ENST00000448481.5,ENST00000529892.5,ENST00000528013.6,ENST00000355498.6,ENST00000483642.5,ENST00000412971.5,ENST00000466231.1,ENST00000372110.7,ENST00000435155.1,ENST00000482094.5,ENST00000462387.5,ENST00000467459.5,ENST00000479746.6,ENST00000485271.5,ENST00000531105.5,ENST00000372104.5,ENST00000476789.5,ENST00000475516.5,ENST00000372115.7,ENST00000492494.5,ENST00000354383.10,EN…	nonsense_mediated_decay,retained_intron,protein_coding	0.12026	0.180927	0.528916	4.64016	0.0880554	0.179877	0.11047	4.52065	0.590907	1
ENSG00000132773	TOE1	ENST00000495703.5,ENST00000372090.5,ENST00000471337.5,ENST00000460057.1,ENST00000477731.5	processed_transcript,protein_coding	0.015968	0.0293934	-0.493984	4.57761	0.0762276	0.162316	0.175732	4.98965	0.557018	1
ENSG00000070759	TESK2	ENST00000372084.5,ENST00000486676.5,ENST00000372086.3,ENST00000493974.1	processed_transcript,protein_coding	2.97325e-06	9.13791e-06	0.334714	3.58728	0.231663	0.39662	-1.16482	3.05708	0.00123802	0.00596905
ENSG00000280670	CCDC163	ENST00000629670.1,ENST00000626657.2,ENST00000629009.2,ENST00000629482.2,ENST00000628397.2,ENST00000628293.1,ENST00000625766.2,ENST00000626177.2	nonsense_mediated_decay,processed_transcript,retained_intron,protein_coding	0.413995	0.51504	0.677541	1.2315	0.137323	0.261879	0.669915	1.36459	0.0696987	0.210871
ENSG00000132763	MMACHC	ENST00000401061.8,ENST00000477188.1,ENST00000616135.1	processed_transcript,protein_coding	1.04564e-10	4.73942e-10	-2.26465	4.06273	5.66912e-13	5.67266e-12	0.290362	5.00613	0.148118	0.393879
ENSG00000117450	PRDX1	ENST00000483583.1,ENST00000319248.12,ENST00000424390.1,ENST00000372079.1,ENST00000447184.5,ENST00000262746.5	processed_transcript,protein_coding	0.417317	0.518628	0.451583	8.63868	0.112899	0.22186	-0.18625	8.4131	0.633483	1
ENSG00000117448	AKR1A1	ENST00000475919.1,ENST00000476957.5,ENST00000473038.5,ENST00000487654.5,ENST00000481885.5,ENST00000475985.1,ENST00000495913.5,ENST00000496999.5,ENST00000621846.4,ENST00000351829.8,ENST00000497973.5,ENST00000372070.7,ENST00000434299.5,ENST00000471651.1	processed_transcript,protein_coding	0.000908905	0.00206878	-0.205017	6.77912	0.480122	0.704831	-1.09193	6.53918	3.71756e-09	3.7492e-08
ENSG00000281133	AL355480.3	ENST00000630128.1	pseudogene	0.0135023	0.0251631	6.00836	-1.62783	0.00478906	0.0139015	4.06643	-2.6409	0.158698	0.408127
ENSG00000280836	AL355480.1	ENST00000629041.1	pseudogene	0.0508937	0.0830282	3.01954	-1.25607	0.00558427	0.0159351	1.30154	-1.97806	0.303601	0.670896
ENSG00000132780	NASP	ENST00000437901.6,ENST00000372052.8,ENST00000527470.5,ENST00000527359.5,ENST00000534450.1,ENST00000534101.1,ENST00000350030.7,ENST00000529333.5,ENST00000537798.5,ENST00000531612.5,ENST00000527932.1,ENST00000530073.5,ENST00000437362.6,ENST00000464190.6,ENST00000472408.1,ENST00000481782.1,ENST00000629893.1,ENST00000525515.5,ENST00000530840.5,ENST00000528084.5,ENST00000351223.7,ENST00000470768.5,ENS…	nonsense_mediated_decay,processed_transcript,retained_intron,protein_coding	0.376919	0.477321	-0.665184	7.89715	0.0738465	0.157893	-0.0970262	8.24881	0.548434	1
ENSG00000281825	AL355480.4	ENST00000626823.1	pseudogene	0.174239	0.241276	3.8541	-2.46383	0.312854	0.479929	-5.12548e-15	-3.2253	1	1
ENSG00000159588	CCDC17	ENST00000421127.6,ENST00000372044.7,ENST00000464739.5,ENST00000528266.5,ENST00000491755.5,ENST00000479529.2,ENST00000525599.1,ENST00000445048.2,ENST00000482416.5	nonsense_mediated_decay,processed_transcript,retained_intron,protein_coding	7.19819e-05	0.000189801	1.43486	2.19434	0.000134614	0.000517964	-0.313229	1.3534	0.360791	0.770972
ENSG00000159592	GPBP1L1	ENST00000480083.5,ENST00000468724.1,ENST00000480941.1,ENST00000493083.5,ENST00000479235.5,ENST00000496278.1,ENST00000498128.1,ENST00000290795.7,ENST00000355105.7,ENST00000487436.1,ENST00000495616.1,ENST00000488278.5,ENST00000460859.1,ENST00000467032.1	processed_transcript,protein_coding	0.00244074	0.00521595	-0.775254	7.10835	0.013945	0.0364099	0.360337	7.73989	0.0170901	0.0626944
ENSG00000225447	RPS15AP10	ENST00000432472.1	processed_pseudogene	0.314024	0.407097	-0.21117	0.709006	0.804052	1	0.521183	1.11199	0.194659	0.482202
ENSG00000234329	RP11-767N6.2	ENST00000437848.1	processed_pseudogene	0.504174	0.602008	0.602093	2.26265	0.0988978	0.198528	0.199374	2.16506	0.604538	1
ENSG00000159596	TMEM69	ENST00000496366.1,ENST00000372025.4	processed_transcript,protein_coding	2.84194e-37	3.95573e-36	2.6902	7.01553	1.20322e-15	1.47975e-14	0.0203416	5.24102	0.917979	1
ENSG00000197429	IPP	ENST00000359942.8,ENST00000495072.1,ENST00000461718.5,ENST00000396478.3	processed_transcript,protein_coding	0.344593	0.442425	-0.0542767	1.49271	0.97029	1	-0.605966	1.34027	0.196447	0.486104
ENSG00000230896	RP11-767N6.7	ENST00000430643.1	sense_intronic	0.466291	0.566246	-4.16103	-2.01974	0.169742	0.316424	0.522153	-1.70202	0.640506	1
ENSG00000236111	RP11-630I5.1	ENST00000463059.1	processed_pseudogene	0.61423	0.680069	2.96192	-2.62475	1	1	-5.12548e-15	-3.2253	1	1
ENSG00000086015	MAST2	ENST00000498668.1,ENST00000372008.6,ENST00000467367.5,ENST00000482881.1,ENST00000488619.1,ENST00000477968.1,ENST00000361297.6,ENST00000372009.3,ENST00000470809.1,ENST00000492813.1	processed_transcript,retained_intron,protein_coding	1.02381e-20	8.25447e-20	2.26459	6.81325	3.70347e-17	5.11927e-16	-0.161857	5.3113	0.347891	0.74902
ENSG00000232467	TMA16P2	ENST00000413187.2	processed_pseudogene	0.136213	0.202294	1.03072	-2.47703	1	1	0.808291	-2.76612	1	1
ENSG00000117461	PIK3R3	ENST00000493202.1,ENST00000372006.5,ENST00000423209.5,ENST00000420542.5,ENST00000425892.2,ENST00000262741.9,ENST00000488808.1	processed_transcript,protein_coding	4.12539e-199	5.52353e-197	6.86571	7.36236	8.41691e-80	3.45309e-77	1.94903	2.89832	1.07847e-05	7.31631e-05
ENSG00000117472	TSPAN1	ENST00000464786.5,ENST00000472170.1,ENST00000482928.5,ENST00000482143.5,ENST00000372003.5,ENST00000469330.5,ENST00000498443.5,ENST00000470318.1,ENST00000475163.5	processed_transcript,protein_coding	9.94282e-05	0.00025744	5.61886	-1.83046	0.00847868	0.0232611	-5.12548e-15	-3.2253	1	1
ENSG00000085998	POMGNT1	ENST00000475642.1,ENST00000497439.5,ENST00000485714.1,ENST00000477114.1,ENST00000463030.1,ENST00000371992.1,ENST00000396420.7,ENST00000489985.1,ENST00000480972.1,ENST00000371984.7	processed_transcript,protein_coding	0.00311966	0.00655779	-1.20817	4.667	0.000199177	0.000746594	-0.454495	5.02616	0.013282	0.0502331
ENSG00000171357	LURAP1	ENST00000371980.3	protein_coding	1.06362e-53	2.13257e-52	-5.30611	1.66795	3.94272e-14	4.32079e-13	-9.7108	1.52919	4.35315e-27	1.26752e-25
ENSG00000085999	RAD54L	ENST00000459678.2,ENST00000472889.2,ENST00000493032.5,ENST00000493985.5,ENST00000473251.2,ENST00000488942.5,ENST00000487700.1,ENST00000469835.5,ENST00000476687.2,ENST00000371975.8,ENST00000463715.5,ENST00000442598.5	nonsense_mediated_decay,processed_transcript,protein_coding	1.69891e-11	8.14949e-11	-1.56361	5.79349	1.08953e-08	7.11818e-08	-0.0171109	6.46051	0.934595	1
ENSG00000132128	LRRC41	ENST00000472710.2,ENST00000498402.2,ENST00000617190.4,ENST00000469150.1,ENST00000496156.5,ENST00000617760.4,ENST00000615587.4,ENST00000343304.10	nonsense_mediated_decay,processed_transcript,protein_coding	0.000447996	0.0010661	-0.0928656	6.23667	0.726036	0.995678	0.0128587	6.39451	0.943401	1
ENSG00000173660	UQCRH	ENST00000496387.5,ENST00000489056.5,ENST00000311672.9,ENST00000486951.1,ENST00000460947.1	nonsense_mediated_decay,retained_intron,protein_coding	6.78353e-16	4.29508e-15	-0.372358	5.75359	0.171702	0.319483	1.26553	6.79627	5.98278e-09	5.91074e-08
ENSG00000117481	NSUN4	ENST00000537428.2,ENST00000486270.5,ENST00000307089.7,ENST00000472157.1,ENST00000498008.5,ENST00000469918.5,ENST00000474844.5,ENST00000475281.1,ENST00000495427.1	nonsense_mediated_decay,retained_intron,protein_coding	0.406301	0.508532	-0.548593	5.72744	0.0397517	0.0913046	-0.0854258	6.03499	0.590731	1
ENSG00000225779	RP4-603I14.3	ENST00000457027.1	processed_pseudogene	0.453633	0.555133	-2.02858	-1.51367	0.246779	0.419759	-0.497936	-1.47044	0.818113	1
ENSG00000117480	FAAH	ENST00000243167.8,ENST00000493636.1,ENST00000493735.5,ENST00000468718.5,ENST00000489366.2,ENST00000484697.5	nonsense_mediated_decay,processed_transcript,retained_intron,protein_coding	9.89696e-06	2.88252e-05	2.83018	2.39267	1.90584e-12	1.81888e-11	1.55974	1.59358	0.000415681	0.00219008
ENSG00000232022	FAAHP1	ENST00000607656.5,ENST00000606395.1,ENST00000635298.1,ENST00000446499.1,ENST00000429784.2,ENST00000635606.1,ENST00000455247.1	transcribed_unprocessed_pseudogene,processed_transcript	1.05191e-34	1.36889e-33	-2.07222	2.04925	7.43118e-07	3.93575e-06	-6.23944	1.74836	8.75259e-30	2.79245e-28
ENSG00000224863	LINC01398	ENST00000416581.1,ENST00000634819.1	lincRNA,retained_intron	0.209145	0.282844	3.8541	-2.46383	0.312854	0.479929	-5.12548e-15	-3.2253	1	1
ENSG00000197587	DMBX1	ENST00000371956.8,ENST00000360032.3	protein_coding	0.0111429	0.0210441	5.36403	-1.94221	0.0381214	0.0884102	-5.12548e-15	-3.2253	1	1
ENSG00000282881	RP11-49P4.7	ENST00000634804.1	protein_coding	0.00128897	0.00287377	5.11779	-2.05747	0.0490569	0.11019	-5.12548e-15	-3.2253	1	1
ENSG00000162456	KNCN	ENST00000396314.3,ENST00000481882.6,ENST00000524908.1,ENST00000294445.7	processed_transcript,retained_intron,protein_coding	0.037105	0.0630067	4.48841	-2.31164	0.190109	0.331684	-5.12548e-15	-3.2253	1	1
ENSG00000079277	MKNK1	ENST00000496619.5,ENST00000484301.5,ENST00000465783.5,ENST00000486716.5,ENST00000525888.5,ENST00000474868.1,ENST00000532897.5,ENST00000342571.7,ENST00000529170.5,ENST00000477883.1,ENST00000532783.5,ENST00000460098.1,ENST00000528077.5,ENST00000470237.5,ENST00000528237.5,ENST00000480531.5,ENST00000531355.5,ENST00000341183.9,ENST00000468852.2,ENST00000371946.8,ENST00000531769.5,ENST00000428112.6,ENS…	nonsense_mediated_decay,processed_transcript,retained_intron,protein_coding	0.00365479	0.00760622	-0.903227	4.98901	0.00694696	0.0194353	-0.0774123	5.42726	0.689858	1
ENSG00000142961	MOB3C	ENST00000477318.1,ENST00000319928.7,ENST00000371940.1,ENST00000271139.12	processed_transcript,protein_coding	1.79764e-06	5.65074e-06	-0.0613441	2.56312	0.878137	1	0.864376	3.17641	0.00043967	0.0023076
ENSG00000123472	ATPAF1	ENST00000532925.5,ENST00000487193.1,ENST00000576409.5,ENST00000460928.1,ENST00000329231.8,ENST00000371937.8,ENST00000574428.5,ENST00000525633.1,ENST00000529214.5,ENST00000474020.5,ENST00000534216.5,ENST00000526821.5,ENST00000492233.5,ENST00000542495.5	nonsense_mediated_decay,processed_transcript,retained_intron,protein_coding	5.17126e-09	2.04929e-08	-2.30757	4.93825	1.38712e-14	1.57404e-13	0.318807	5.92175	0.311491	0.685301
ENSG00000233647	NENFP1	ENST00000419476.2	processed_pseudogene	1.70463e-05	4.83154e-05	-3.1869	-0.791187	0.0188091	0.0478526	-0.293029	-0.469635	0.775832	1
ENSG00000186118	TEX38	ENST00000564071.1,ENST00000415500.1,ENST00000334122.4,ENST00000564373.1	protein_coding	0.0110368	0.0208511	4.84104	-2.17945	0.0791691	0.163057	-5.12548e-15	-3.2253	1	1
ENSG00000159658	EFCAB14	ENST00000371933.7,ENST00000484461.1,ENST00000481623.1,ENST00000459797.1,ENST00000487741.6,ENST00000479745.5	nonsense_mediated_decay,processed_transcript,retained_intron,protein_coding	3.40925e-07	1.14597e-06	0.186468	6.44405	0.468766	0.690186	1.02747	7.05714	2.4087e-11	2.9368e-10
ENSG00000142973	CYP4B1	ENST00000614163.4,ENST00000413093.2,ENST00000371923.8,ENST00000534708.6,ENST00000529715.5,ENST00000497005.1,ENST00000371919.8,ENST00000481248.1,ENST00000452782.6,ENST00000526297.5,ENST00000546128.5,ENST00000468637.3,ENST00000640628.1,ENST00000464439.6,ENST00000271153.8	nonsense_mediated_decay,processed_transcript,retained_intron,protein_coding	1.10428e-07	3.87596e-07	6.14681	-1.53757	0.00210619	0.00658695	-5.12548e-15	-3.2253	1	1
ENSG00000154198	CYP4Z2P	ENST00000423332.1,ENST00000505841.5	transcribed_unprocessed_pseudogene,processed_transcript	0.174239	0.241276	3.8541	-2.46383	0.312854	0.479929	-5.12548e-15	-3.2253	1	1
ENSG00000187048	CYP4A11	ENST00000462347.5,ENST00000465874.5,ENST00000474458.5,ENST00000496519.1,ENST00000371904.8,ENST00000468629.5,ENST00000310638.8,ENST00000371905.1,ENST00000475477.5	nonsense_mediated_decay,processed_transcript,protein_coding	0.0443941	0.0733522	4.45737	-2.31361	0.190109	0.331684	2.30325	-3.05558	1	1
ENSG00000186160	CYP4Z1	ENST00000334194.3,ENST00000471598.1	processed_transcript,protein_coding	0.45974	0.559869	2.96192	-2.62475	1	1	-5.12548e-15	-3.2253	1	1
ENSG00000225154	RP11-184J23.2	ENST00000445574.2	processed_pseudogene	0.776051	0.81884	0	-2.80372	1	1	-5.12548e-15	-3.2253	1	1
ENSG00000225506	CYP4A22-AS1	ENST00000444042.2	lincRNA	4.37068e-08	1.59806e-07	2.3151	-0.386237	0.00132226	0.00428611	1.25504	-0.801155	0.0783687	0.231349
ENSG00000162365	CYP4A22	ENST00000371891.7,ENST00000485117.1,ENST00000294337.7,ENST00000620131.1,ENST00000371890.7,ENST00000490948.5,ENST00000619754.4	processed_transcript,protein_coding	0.00836335	0.0161085	4.78587	-2.18341	0.120517	0.232546	-5.12548e-15	-3.2253	1	1
ENSG00000225514	MTND1P34	ENST00000438556.1	transcribed_processed_pseudogene	0.251144	0.33324	-1.93442	-2.63768	1	1	1.33909	-2.64068	0.656024	1
ENSG00000162366	PDZK1IP1	ENST00000371885.1,ENST00000489919.1,ENST00000491793.1,ENST00000294338.6	processed_transcript,protein_coding	0.00722096	0.0142075	4.84104	-2.17945	0.0791691	0.163057	-5.12548e-15	-3.2253	1	1
ENSG00000162367	TAL1	ENST00000465912.1,ENST00000464796.5,ENST00000371884.6,ENST00000294339.3,ENST00000459729.1,ENST00000481091.1	processed_transcript,protein_coding	2.93703e-18	2.09835e-17	-1.48868	0.672516	0.0168013	0.0431493	-8.29434	0.191865	1.78512e-13	2.57083e-12
ENSG00000123473	STIL	ENST00000436811.1,ENST00000396221.6,ENST00000337817.9,ENST00000371877.7,ENST00000447475.6,ENST00000418131.1,ENST00000413565.1,ENST00000360380.7,ENST00000433827.2	retained_intron,protein_coding	2.23281e-05	6.24998e-05	-1.24902	5.88004	0.000206106	0.00077085	-0.115566	6.41456	0.590934	1
ENSG00000162368	CMPK1	ENST00000371871.8,ENST00000450808.2,ENST00000471289.2,ENST00000371873.9,ENST00000371870.3	nonsense_mediated_decay,retained_intron,protein_coding	7.71279e-05	0.000202702	-1.19858	6.30952	0.000106158	0.000415745	0.773381	7.32511	1.08153e-06	8.32949e-06
ENSG00000186790	FOXE3	ENST00000335071.3	protein_coding	0.0289573	0.0508775	1.56618	-1.87181	0.444327	0.658231	-3.72112	-2.76545	0.283029	0.635084
ENSG00000186564	FOXD2	ENST00000334793.5	protein_coding	4.72792e-16	3.02406e-15	4.15332	1.71932	1.79195e-15	2.1696e-14	1.83898	0.0747587	0.000215944	0.00119224
ENSG00000227947	LINC01738	ENST00000454285.1	lincRNA	0.160252	0.2309	3.9239	-2.4599	0.312854	0.479929	-5.12548e-15	-3.2253	1	1
ENSG00000269113	TRABD2B	ENST00000435576.2,ENST00000606738.2	processed_transcript,protein_coding	2.25364e-06	7.01316e-06	6.3089	-1.44784	0.00294082	0.0089268	-5.12548e-15	-3.2253	1	1
ENSG00000242267	SKINT1L	ENST00000452503.1,ENST00000604015.1,ENST00000401057.7,ENST00000453388.1	processed_transcript,transcribed_unitary_pseudogene	0.166084	0.23806	0	-2.80372	1	1	-5.12548e-15	-3.2253	1	1
ENSG00000223720	RP5-1024N4.2	ENST00000431986.2	lincRNA	0.174239	0.241276	3.8541	-2.46383	0.312854	0.479929	-5.12548e-15	-3.2253	1	1
ENSG00000117834	SLC5A9	ENST00000527929.1,ENST00000438567.6,ENST00000425816.5,ENST00000493837.6,ENST00000532322.5,ENST00000236495.9,ENST00000533824.5,ENST00000441260.2,ENST00000525901.1,ENST00000471020.1	nonsense_mediated_decay,processed_transcript,retained_intron,protein_coding	0.0012451	0.0027843	3.43324	-1.8473	0.0372957	0.086911	-2.34027	-3.05521	1	1
ENSG00000132122	SPATA6	ENST00000463938.5,ENST00000603831.5,ENST00000487543.2,ENST00000371843.7,ENST00000371847.7,ENST00000371841.1,ENST00000471975.2,ENST00000487629.1,ENST00000490850.1,ENST00000465990.5,ENST00000396199.7	nonsense_mediated_decay,processed_transcript,protein_coding	6.54792e-71	1.74031e-69	-6.35933	1.79122	1.48756e-17	2.1147e-16	-9.86344	1.67713	2.1411e-32	7.41506e-31
ENSG00000224986	PPP1R8P1	ENST00000452549.2	processed_pseudogene	0.00289005	0.0061064	-3.24218	-2.35603	0.541902	0.777653	-3.72133	-2.76543	0.283029	0.635084
ENSG00000235105	RP11-329A14.1	ENST00000412769.1	processed_pseudogene	0.191246	0.26159	-1.19284	-1.91128	0.725319	0.994738	-2.362	-2.31775	0.150228	0.398319
ENSG00000186094	AGBL4	ENST00000371836.1,ENST00000416121.5,ENST00000497451.1,ENST00000371838.5,ENST00000334103.11,ENST00000371839.5	processed_transcript,protein_coding	0.475387	0.575355	2.96192	-2.62475	1	1	-5.12548e-15	-3.2253	1	1
ENSG00000162373	BEND5	ENST00000371833.3,ENST00000476096.1,ENST00000489956.1,ENST00000463562.1,ENST00000480399.1,ENST00000476079.5	processed_transcript,retained_intron,protein_coding	4.17129e-07	1.39086e-06	6.16625	-1.53554	0.00328856	0.00985244	4.06512	-2.64102	0.158698	0.408127
ENSG00000215887	ZNF859P	ENST00000502859.1	unprocessed_pseudogene	0.00229626	0.00492297	5.19346	-2.05149	0.0585427	0.128586	-5.12548e-15	-3.2253	1	1
ENSG00000162374	ELAVL4	ENST00000371819.1,ENST00000371821.5,ENST00000492299.1,ENST00000371823.8,ENST00000371827.5,ENST00000371824.5,ENST00000357083.8,ENST00000463650.1,ENST00000448907.6,ENST00000474675.1,ENST00000494555.1	processed_transcript,protein_coding	0.0445671	0.0735696	4.39582	-2.31757	0.190109	0.331684	-5.12548e-15	-3.2253	1	1
ENSG00000234080	RP11-183G22.1	ENST00000423464.1	processed_pseudogene	0.501019	0.598634	2.96192	-2.62475	1	1	2.30487	-3.05545	1	1
ENSG00000142700	DMRTA2	ENST00000404795.3,ENST00000418121.5	protein_coding	0.024146	0.0429835	2.96192	-2.62475	1	1	4.37313	-2.52537	0.0984446	0.279234
ENSG00000185104	FAF1	ENST00000396153.6,ENST00000472808.1,ENST00000487898.1,ENST00000494400.5,ENST00000371778.5	nonsense_mediated_decay,processed_transcript,protein_coding	0.604081	0.680069	-0.200012	6.36175	0.451531	0.667821	0.0534373	6.5896	0.735665	1
ENSG00000237130	MRPS6P2	ENST00000381143.4	processed_pseudogene	0.770289	0.817364	0	-2.80372	1	1	-5.12548e-15	-3.2253	1	1
ENSG00000123080	CDKN2C	ENST00000396148.1,ENST00000262662.5,ENST00000371761.3	protein_coding	1.65197e-21	1.38204e-20	-2.99369	5.2145	1.2089e-22	2.3646e-21	-0.7237	5.81002	6.31571e-05	0.00038277
ENSG00000213478	CFL1P2	ENST00000440986.1	processed_pseudogene	0.60401	0.680069	3.00207	-2.62279	1	1	-5.12548e-15	-3.2253	1	1
ENSG00000203356	LINC01562	ENST00000366181.2	lincRNA	0.00295477	0.00623329	5.5725	-1.83447	0.0233917	0.0576238	2.30487	-3.05545	1	1
ENSG00000123091	RNF11	ENST00000486691.1,ENST00000494873.1,ENST00000242719.3	processed_transcript,protein_coding	0.000140384	0.000355967	1.27478	5.62919	7.4511e-06	3.46361e-05	0.264602	5.10769	0.186191	0.46428
ENSG00000233406	RP11-296A18.5	ENST00000480705.1	processed_pseudogene	0.367462	0.466552	0.156341	-1.21314	1	1	-0.491401	-1.46996	0.670457	1
ENSG00000085831	TTC39A	ENST00000371747.7,ENST00000527205.1,ENST00000431927.5,ENST00000371750.9,ENST00000524442.1,ENST00000532836.5,ENST00000447632.6,ENST00000525906.1,ENST00000530004.5,ENST00000262675.11,ENST00000262676.9,ENST00000439482.5,ENST00000411642.6,ENST00000422925.5,ENST00000401051.7,ENST00000413473.6,ENST00000380849.6,ENST00000534098.1	processed_transcript,protein_coding	2.99949e-17	2.05488e-16	5.38335	0.106028	1.54284e-08	9.93377e-08	1.64574	-2.13855	0.226913	0.547561
ENSG00000085832	EPS15	ENST00000371727.5,ENST00000493793.1,ENST00000471391.1,ENST00000486505.5,ENST00000464478.5,ENST00000371733.7,ENST00000478657.1,ENST00000465467.1,ENST00000371730.6	nonsense_mediated_decay,processed_transcript,retained_intron,protein_coding	1.05451e-15	6.60486e-15	-1.98548	7.03865	1.63196e-09	1.16542e-08	-0.985839	7.40476	3.32147e-10	3.69053e-09
ENSG00000232027	RP11-275F13.3	ENST00000422197.2	processed_pseudogene	0.174239	0.241276	3.8541	-2.46383	0.312854	0.479929	-5.12548e-15	-3.2253	1	1
ENSG00000227742	CALR4P	ENST00000431943.1	unitary_pseudogene	0.00289037	0.00610669	5.16217	-2.05348	0.0391901	0.0901052	-5.12548e-15	-3.2253	1	1
ENSG00000117859	OSBPL9	ENST00000462759.5,ENST00000524620.1,ENST00000481937.5,ENST00000534040.5,ENST00000489990.5,ENST00000447887.5,ENST00000528603.5,ENST00000371714.5,ENST00000531061.1,ENST00000532975.5,ENST00000625138.1,ENST00000475697.5,ENST00000533884.5,ENST00000473207.6,ENST00000531828.5,ENST00000361556.9,ENST00000531819.5,ENST00000526917.5,ENST00000484890.5,ENST00000435274.6,ENST00000527631.5,ENST00000467064.5,ENS…	nonsense_mediated_decay,processed_transcript,retained_intron,protein_coding	0.563138	0.664868	0.18762	6.65843	0.553866	0.792723	0.45902	6.9157	0.0114604	0.0440571
ENSG00000236973	GAPDHP51	ENST00000426454.2	processed_pseudogene	0.770289	0.817364	0	-2.80372	1	1	-5.12548e-15	-3.2253	1	1
ENSG00000232846	SLC25A6P3	ENST00000424829.1	processed_pseudogene	0.0384862	0.0651239	3.04908	-0.716078	0.000126618	0.000489818	0.914271	-1.70297	0.619046	1
ENSG00000078618	NRDC	ENST00000544028.5,ENST00000475715.1,ENST00000539524.5,ENST00000468722.1,ENST00000497358.1,ENST00000473805.5,ENST00000354831.11,ENST00000475310.5,ENST00000352171.11,ENST00000485608.5,ENST00000483007.1,ENST00000440943.5,ENST00000491410.1,ENST00000464385.1	processed_transcript,protein_coding	0.317344	0.410868	-0.619786	7.28093	0.023586	0.0580713	-0.0507226	7.63705	0.761954	1
ENSG00000169213	RAB3B	ENST00000371655.3	protein_coding	6.02395e-35	7.90026e-34	5.64773	-0.345416	4.53393e-05	0.000188203	3.25215	-1.83455	0.00737441	0.0297243
ENSG00000117862	TXNDC12	ENST00000471493.1,ENST00000469458.5,ENST00000610127.1,ENST00000472624.5,ENST00000371626.8	nonsense_mediated_decay,processed_transcript,protein_coding	7.24321e-06	2.14475e-05	-1.49316	5.54182	3.85904e-08	2.37295e-07	-0.202707	6.09951	0.276251	0.635084
ENSG00000198841	KTI12	ENST00000371614.1	protein_coding	0.00010038	0.000259526	1.05151	4.30771	0.000173429	0.000655608	0.722422	4.21517	0.000976256	0.00480544
ENSG00000134717	BTF3L4	ENST00000533836.1,ENST00000524414.5,ENST00000484036.1,ENST00000477828.6,ENST00000489308.6,ENST00000313334.12,ENST00000472944.6,ENST00000526132.5	nonsense_mediated_decay,processed_transcript,retained_intron,protein_coding	4.75158e-07	1.57516e-06	-1.88321	5.57139	9.5597e-05	0.000377248	0.598411	6.64561	0.00506428	0.0212394
ENSG00000157077	ZFYVE9	ENST00000469134.1,ENST00000371591.1,ENST00000287727.7,ENST00000361625.5,ENST00000357206.6	processed_transcript,retained_intron,protein_coding	2.33018e-14	1.34936e-13	-0.520699	5.16707	0.05277	0.117618	-1.38416	4.97169	3.46524e-09	3.50689e-08
ENSG00000228407	RP4-800M22.1	ENST00000414059.2	processed_pseudogene	0.414266	0.515276	0	-2.80372	1	1	3.15156	-2.90353	0.52202	0.980779
ENSG00000224255	PDCL3P6	ENST00000429744.2	processed_pseudogene	0.0636947	0.101835	-0.152063	-1.56085	1	1	-1.38641	-1.9766	0.25905	0.610202
ENSG00000213735	ANAPC10P1	ENST00000395991.2	processed_pseudogene	0.176715	0.244198	-0.948042	-2.00695	1	1	0.607169	-1.8336	0.644632	1
ENSG00000154222	CC2D1B	ENST00000494789.1,ENST00000450942.2,ENST00000492426.1,ENST00000460261.5,ENST00000485966.1,ENST00000491136.6,ENST00000438021.5,ENST00000470844.5,ENST00000284376.7,ENST00000460370.1,ENST00000371586.6	processed_transcript,retained_intron,protein_coding	0.222762	0.299118	0.848348	5.59516	0.00196409	0.00619709	0.0849847	5.26457	0.626059	1
ENSG00000224680	PLA2G12AP1	ENST00000497678.2	processed_pseudogene	0.282907	0.370358	2.184	-1.66917	0.142135	0.269914	-0.571323	-2.52471	1	1
ENSG00000085840	ORC1	ENST00000371566.1,ENST00000371568.7	protein_coding	1.26801e-21	1.0678e-20	-2.03486	5.7708	1.22262e-13	1.28824e-12	0.183222	6.6434	0.257442	0.607219
ENSG00000134748	PRPF38A	ENST00000474048.1,ENST00000257181.9,ENST00000487160.1	processed_transcript,protein_coding	0.431493	0.533077	-0.514532	6.29242	0.171762	0.319576	0.166159	6.71443	0.383179	0.810706
ENSG00000134744	ZCCHC11	ENST00000524582.1,ENST00000257177.8,ENST00000355809.4,ENST00000497120.1,ENST00000528457.5,ENST00000473856.5,ENST00000481528.1,ENST00000474453.6,ENST00000466440.1,ENST00000481133.1,ENST00000471623.1,ENST00000484723.6,ENST00000531722.5,ENST00000528642.5,ENST00000494469.5,ENST00000371544.7,ENST00000470626.1,ENST00000469810.1,ENST00000527941.5,ENST00000470212.1,ENST00000371541.5	nonsense_mediated_decay,processed_transcript,retained_intron,protein_coding	0.000742314	0.00171695	-1.28078	6.55209	0.00493675	0.0142978	-0.148423	7.08294	0.350142	0.752994
ENSG00000272371	RP11-25O10.2	ENST00000607321.1	lincRNA	0.0709308	0.112371	-0.692184	-1.29693	0.659251	0.925548	-1.26076	-1.58022	0.381128	0.807208
ENSG00000236290	EEF1GP7	ENST00000422983.1	processed_pseudogene	0.112607	0.170439	-3.24218	-2.35603	0.541902	0.777653	-3.72133	-2.76543	0.283029	0.635084
ENSG00000116157	GPX7	ENST00000361314.4,ENST00000459779.1	processed_transcript,protein_coding	5.25004e-118	2.63325e-116	-5.81148	2.98451	5.40668e-28	1.43699e-26	-11.1654	2.95501	1.22335e-57	8.15569e-56
ENSG00000182183	FAM159A	ENST00000401050.7,ENST00000424164.1,ENST00000517870.1,ENST00000440303.5	processed_transcript,protein_coding	0.0225166	0.040287	-2.73312	-2.48948	1	1	-3.18992	-2.90309	0.52202	0.980779
ENSG00000162377	COA7	ENST00000371538.4,ENST00000486918.1	processed_transcript,protein_coding	7.52603e-09	2.94201e-08	-1.80901	5.44081	5.9433e-09	4.00306e-08	0.493481	6.43715	0.00865612	0.0343199
ENSG00000233664	NDUFS5P3	ENST00000450668.1	processed_pseudogene	0.779382	0.81884	0	-2.80372	1	1	-5.12548e-15	-3.2253	1	1
ENSG00000162378	ZYG11B	ENST00000294353.6,ENST00000545132.5	protein_coding	9.83035e-07	3.16789e-06	-1.49945	5.207	5.59117e-08	3.37326e-07	0.317351	6.02792	0.0555081	0.173734
ENSG00000228929	RPS13P2	ENST00000437890.1	processed_pseudogene	0.0187951	0.0341167	2.08533	-0.209441	0.00118068	0.00387028	1.09986	-0.58277	0.0957451	0.274686
ENSG00000203995	ZYG11A	ENST00000371528.1,ENST00000612017.4,ENST00000371532.5	protein_coding	2.97966e-07	1.00664e-06	5.39117	-1.94021	0.0240909	0.0589245	-5.12548e-15	-3.2253	1	1
ENSG00000121310	ECHDC2	ENST00000493896.2,ENST00000371522.8,ENST00000467988.2,ENST00000498544.5,ENST00000476477.6,ENST00000358358.9,ENST00000492992.1,ENST00000487866.5,ENST00000495920.5,ENST00000536120.5,ENST00000460612.5,ENST00000479593.5,ENST00000371520.5,ENST00000539680.1,ENST00000487040.1,ENST00000480312.6,ENST00000488268.5,ENST00000544531.5,ENST00000542552.1,ENST00000486170.2,ENST00000479183.6,ENST00000463923.5,ENS…	nonsense_mediated_decay,processed_transcript,retained_intron,protein_coding	1.44539e-59	3.20308e-58	2.19068	1.07341	0.00083365	0.00280071	4.299	3.19851	2.30837e-36	8.96456e-35
ENSG00000230953	RP4-631H13.6	ENST00000420575.2	processed_pseudogene	0.0376276	0.0637892	4.39582	-2.31757	0.190109	0.331684	-5.12548e-15	-3.2253	1	1
ENSG00000231866	RP4-631H13.4	ENST00000436385.2	processed_pseudogene	0.492446	0.59064	2.96192	-2.62475	1	1	2.30325	-3.05558	1	1
ENSG00000116171	SCP2	ENST00000478631.6,ENST00000371514.7,ENST00000408941.7,ENST00000529363.2,ENST00000407246.6,ENST00000371509.8,ENST00000528311.5,ENST00000484100.5,ENST00000430330.6,ENST00000528809.1,ENST00000371513.9,ENST00000640998.1,ENST00000478274.6,ENST00000473584.1,ENST00000533119.1,ENST00000435345.6,ENST00000488965.1	nonsense_mediated_decay,processed_transcript,protein_coding	3.18741e-13	1.71683e-12	-2.62817	5.67583	2.1452e-17	3.01346e-16	-0.133923	6.48442	0.381789	0.808233
ENSG00000226147	TUBBP10	ENST00000427668.1	processed_pseudogene	0.200993	0.273193	-4.71857	-1.7503	0.0611452	0.133669	-1.55233	-1.90255	0.19937	0.492138
ENSG00000174348	PODN	ENST00000618387.1,ENST00000471210.1,ENST00000490650.1,ENST00000471285.1,ENST00000312553.9,ENST00000371500.7,ENST00000395871.6	processed_transcript,protein_coding	6.31194e-11	2.91376e-10	7.03908	-0.88444	5.66903e-06	2.67723e-05	-5.12548e-15	-3.2253	1	1
ENSG00000162383	SLC1A7	ENST00000371494.8,ENST00000611397.4,ENST00000620288.4,ENST00000488036.5,ENST00000620347.4,ENST00000371491.4	processed_transcript,protein_coding	2.58981e-08	9.65335e-08	6.63627	-1.21213	0.000320314	0.00116003	3.15006	-2.90365	0.52202	0.980779
ENSG00000157184	CPT2	ENST00000635888.1,ENST00000638135.1,ENST00000636867.1,ENST00000637726.1,ENST00000371486.3,ENST00000636673.1,ENST00000636935.1,ENST00000468572.2,ENST00000635862.1,ENST00000637252.1,ENST00000636239.1,ENST00000636891.1	nonsense_mediated_decay,retained_intron,protein_coding	1.87905e-08	7.07739e-08	-1.52919	4.39006	2.86255e-07	1.58975e-06	0.309397	5.20314	0.0863849	0.251416
ENSG00000162384	C1orf123	ENST00000470385.5,ENST00000474227.1,ENST00000489755.1,ENST00000602807.1,ENST00000478839.1,ENST00000294360.4,ENST00000483739.5	processed_transcript,retained_intron,protein_coding	0.156211	0.22842	-0.602787	4.83446	0.0231568	0.0571597	-0.0904015	5.15713	0.62724	1
ENSG00000162385	MAGOH	ENST00000462941.1,ENST00000495868.1,ENST00000371466.4,ENST00000371470.7	processed_transcript,protein_coding	0.259299	0.342932	-0.260508	4.07699	0.459615	0.678116	0.546632	4.59496	0.0370219	0.123188
ENSG00000157193	LRP8	ENST00000475501.1,ENST00000459674.5,ENST00000496580.1,ENST00000347547.6,ENST00000481431.1,ENST00000306052.10,ENST00000480045.5,ENST00000465675.5,ENST00000529670.5,ENST00000354412.7,ENST00000460214.5,ENST00000371454.6	nonsense_mediated_decay,processed_transcript,retained_intron,protein_coding	2.24004e-05	6.26802e-05	0.291972	6.40281	0.271355	0.456898	0.653853	6.72018	0.0160651	0.0592601
ENSG00000225030	RP4-784A16.3	ENST00000450469.1	sense_intronic	0.189267	0.259214	0.71286	-0.869612	0.541935	0.777664	0.705806	-0.799656	0.360384	0.770308
ENSG00000225675	LINC01771	ENST00000445039.2	lincRNA	2.82426e-11	1.33871e-10	3.29344	0.704079	1.27698e-08	8.28706e-08	1.72597	-0.184594	0.00434616	0.0185066
ENSG00000230138	RP11-117D22.2	ENST00000449958.1	lincRNA	7.81842e-05	0.000205292	-2.73312	-2.48948	1	1	-3.18992	-2.90309	0.52202	0.980779
ENSG00000236253	SLC25A3P1	ENST00000566461.1,ENST00000566100.1,ENST00000562700.1,ENST00000569142.1,ENST00000563752.5,ENST00000443844.3	transcribed_processed_pseudogene,processed_transcript	0.0369144	0.0627395	4.4265	-2.31559	0.190109	0.331684	-5.12548e-15	-3.2253	1	1
ENSG00000143006	DMRTB1	ENST00000463126.1,ENST00000371445.3	processed_transcript,protein_coding	0.000612761	0.00143346	5.46228	-1.9342	0.0362282	0.0851926	-5.12548e-15	-3.2253	1	1
ENSG00000174332	GLIS1	ENST00000628545.1,ENST00000312233.4	protein_coding	5.96382e-15	3.58187e-14	7.71697	-0.308523	4.02341e-08	2.46598e-07	2.30325	-3.05558	1	1
ENSG00000058804	NDC1	ENST00000480952.1,ENST00000371429.3	processed_transcript,protein_coding	3.63934e-11	1.70986e-10	-2.46271	6.56397	2.9027e-17	4.04382e-16	0.227613	7.54006	0.168288	0.427432
ENSG00000229687	RP4-654H19.2	ENST00000433953.2	processed_pseudogene	0.61423	0.680069	2.96192	-2.62475	1	1	-5.12548e-15	-3.2253	1	1
ENSG00000058799	YIPF1	ENST00000371399.5,ENST00000465897.5,ENST00000480151.5,ENST00000472983.1,ENST00000072644.6,ENST00000464950.6,ENST00000469457.5	nonsense_mediated_decay,processed_transcript,protein_coding	0.232409	0.310461	-0.761509	3.69181	0.0345474	0.0817447	-0.354616	3.94006	0.159222	0.409345
ENSG00000211452	DIO1	ENST00000524406.5,ENST00000530084.5,ENST00000613679.4,ENST00000388876.3,ENST00000529329.1,ENST00000529589.5,ENST00000532493.5,ENST00000610607.4,ENST00000525202.5,ENST00000526329.1,ENST00000527060.5,ENST00000617230.2,ENST00000322679.10,ENST00000525044.5,ENST00000528946.5,ENST00000361921.7,ENST00000534069.5	nonsense_mediated_decay,processed_transcript,retained_intron,protein_coding	1.0669e-06	3.42675e-06	6.26294	-1.45393	0.000748464	0.0025369	3.15156	-2.90353	0.52202	0.980779
ENSG00000081870	HSPB11	ENST00000371376.1,ENST00000488884.1,ENST00000371378.6,ENST00000489675.1,ENST00000194214.9,ENST00000371377.3	processed_transcript,protein_coding	5.63242e-11	2.6076e-10	-1.40447	3.95805	1.30382e-06	6.68625e-06	0.125259	4.63261	0.505849	0.980779
ENSG00000116212	LRRC42	ENST00000477905.1,ENST00000319223.8,ENST00000371370.7,ENST00000444987.1,ENST00000371368.5	processed_transcript,protein_coding	0.000200802	0.000500832	-1.09795	3.96525	0.00222669	0.00692325	-0.322153	4.33736	0.126162	0.344676
ENSG00000219102	HNRNPA3P12	ENST00000437410.2	processed_pseudogene	0.967785	0.970423	0.228802	-2.34308	1	1	0.876442	-2.41823	0.714339	1
ENSG00000203985	LDLRAD1	ENST00000545928.5,ENST00000420619.5,ENST00000371360.1,ENST00000371362.7	protein_coding	1.0826e-06	3.47299e-06	5.97647	-1.63187	0.00210626	0.00658695	-5.12548e-15	-3.2253	1	1
ENSG00000116209	TMEM59	ENST00000371344.5,ENST00000440019.5,ENST00000420738.5,ENST00000371341.5,ENST00000234831.9,ENST00000470395.1,ENST00000371337.3,ENST00000452421.5,ENST00000371348.5	processed_transcript,protein_coding	5.01467e-07	1.65798e-06	-1.6008	6.10536	5.57333e-09	3.77373e-08	-0.38022	6.61424	0.0534074	0.168394
ENSG00000116205	TCEANC2	ENST00000234827.5,ENST00000498272.1,ENST00000391366.3,ENST00000371331.1	processed_transcript,protein_coding	3.69276e-20	2.90197e-19	-2.80962	5.15953	7.66607e-15	8.84334e-14	-0.827764	5.69646	4.47026e-05	0.000276635
ENSG00000225183	RP4-758J24.4	ENST00000444055.1	processed_pseudogene	0.00271067	0.00575019	-2.557	-1.20891	0.0949878	0.191592	-0.23488	-0.977102	0.898441	1
ENSG00000256407	RP11-446E24.4	ENST00000311841.7,ENST00000525949.1,ENST00000637610.1	nonsense_mediated_decay,processed_transcript	0.347252	0.445498	-1.93121	-2.63801	1	1	2.27911	-2.31933	0.211258	0.516169
ENSG00000157211	CDCP2	ENST00000371330.1,ENST00000530059.2	protein_coding	0.0157375	0.0290093	2.98661	-2.0642	0.137938	0.262802	2.0331	-2.41831	0.288503	0.643133
ENSG00000215883	CYB5RL	ENST00000421415.5,ENST00000420054.5,ENST00000462299.1,ENST00000534324.5,ENST00000493530.2,ENST00000490863.5,ENST00000287899.13,ENST00000497820.1,ENST00000528287.5	nonsense_mediated_decay,retained_intron,protein_coding	1.82341e-13	9.96399e-13	-2.58969	4.12454	1.76899e-08	1.13215e-07	0.454976	5.20841	0.0145282	0.0542099
ENSG00000116221	MRPL37	ENST00000490670.1,ENST00000360840.9,ENST00000336230.10,ENST00000398219.2,ENST00000605337.5,ENST00000487096.5	processed_transcript,protein_coding	0.00135347	0.00300104	-0.921594	6.4037	0.00106163	0.00350736	0.155222	6.97387	0.53584	1
ENSG00000157216	SSBP3	ENST00000448572.1,ENST00000371319.7,ENST00000326956.11,ENST00000426150.5,ENST00000357475.8,ENST00000610401.4,ENST00000371320.7,ENST00000420121.5,ENST00000444533.5,ENST00000533946.5,ENST00000528787.1,ENST00000528930.5,ENST00000530618.1,ENST00000417664.6,ENST00000533209.5,ENST00000525990.1	processed_transcript,retained_intron,protein_coding	1.34438e-59	2.98338e-58	-3.05744	6.96426	2.08155e-24	4.5717e-23	-2.48825	7.13509	2.88591e-39	1.21352e-37
ENSG00000232245	RP4-705F19.1	ENST00000447150.1	lincRNA	0.493	0.590685	1.03072	-2.47703	1	1	-2.34027	-3.05521	1	1
ENSG00000237173	RP5-866L20.2	ENST00000444140.1	processed_pseudogene	0.255924	0.338874	0	-2.80372	1	1	2.30487	-3.05545	1	1
ENSG00000162390	ACOT11	ENST00000343744.6,ENST00000479837.1,ENST00000498228.1,ENST00000481208.5,ENST00000371316.3	processed_transcript,protein_coding	3.83985e-29	4.20805e-28	-2.33373	3.98095	1.82796e-10	1.44111e-09	-2.44191	4.0247	1.48675e-25	4.08377e-24
ENSG00000162391	FAM151A	ENST00000302250.6,ENST00000371304.2	protein_coding	0.0369144	0.0627395	4.4265	-2.31559	0.190109	0.331684	-5.12548e-15	-3.2253	1	1
ENSG00000184313	MROH7	ENST00000438846.5,ENST00000440047.5,ENST00000478097.1,ENST00000371287.3,ENST00000409996.5,ENST00000472987.5,ENST00000421030.6,ENST00000493533.1,ENST00000395690.6,ENST00000422659.5,ENST00000440217.5,ENST00000339553.9,ENST00000413188.5	nonsense_mediated_decay,processed_transcript,retained_intron,protein_coding	2.26018e-10	9.99663e-10	-6.79493	-0.362597	7.03897e-05	0.000283926	-2.2943	-0.440422	0.000399286	0.00211227
ENSG00000271723	MROH7-TTC4	ENST00000414150.6,ENST00000460155.1,ENST00000606515.5,ENST00000425300.6	nonsense_mediated_decay,retained_intron	0.15859	0.2309	-1.93442	-2.63768	1	1	-2.34002	-3.05523	1	1
ENSG00000243725	TTC4	ENST00000486091.1,ENST00000371281.3,ENST00000371284.9,ENST00000486621.1	processed_transcript,retained_intron,protein_coding	3.07299e-26	3.07299e-25	2.72958	3.7972	5.67968e-14	6.15683e-13	-0.0546622	2.01836	0.901714	1
ENSG00000162396	PARS2	ENST00000371279.3	protein_coding	0.0193358	0.0350266	-0.98135	3.04585	0.0234531	0.0577529	0.460796	3.76198	0.0451133	0.146005
ENSG00000006555	TTC22	ENST00000474654.1,ENST00000448308.2,ENST00000488771.1,ENST00000371276.8,ENST00000371274.8	retained_intron,protein_coding	8.67674e-08	3.07959e-07	6.79054	-1.13268	0.00247133	0.00762902	-5.12548e-15	-3.2253	1	1
ENSG00000162398	LEXM	ENST00000371273.3,ENST00000358193.7	protein_coding	1.74933e-05	4.95298e-05	5.78209	-1.73129	0.00960615	0.0259867	-5.12548e-15	-3.2253	1	1
ENSG00000116133	DHCR24	ENST00000436604.1,ENST00000371269.7,ENST00000535035.5	protein_coding	0.0117823	0.0221745	-0.640975	7.45744	0.0189723	0.0481645	0.509925	8.12554	0.113285	0.314107
ENSG00000143001	TMEM61	ENST00000371268.3	protein_coding	0.00144396	0.00318382	3.42999	-1.84699	0.0373657	0.0870425	-2.34002	-3.05523	1	1
ENSG00000162399	BSND	ENST00000371265.4	protein_coding	0.00777619	0.0151795	4.81342	-2.18143	0.0791691	0.163057	-5.12548e-15	-3.2253	1	1
ENSG00000169174	PCSK9	ENST00000490692.1,ENST00000302118.5	processed_transcript,protein_coding	4.32654e-09	1.72652e-08	6.47978	-1.29667	0.000447378	0.00157805	-5.12548e-15	-3.2253	1	1
ENSG00000162402	USP24	ENST00000484447.5,ENST00000480962.1,ENST00000294383.6,ENST00000482197.1,ENST00000512504.1,ENST00000472566.1,ENST00000634589.1	nonsense_mediated_decay,processed_transcript,retained_intron,protein_coding	4.87553e-09	1.93786e-08	-1.26173	7.93039	0.000156299	0.000595213	-0.731669	8.21243	2.28354e-06	1.69073e-05
ENSG00000231090	RP11-101C11.1	ENST00000451250.1	lincRNA	1.16365e-06	3.72121e-06	-3.91476	-2.12286	0.290229	0.479929	-4.41404	-2.52412	0.0778999	0.230388
ENSG00000231095	GYG1P3	ENST00000449769.1	processed_pseudogene	9.8609e-10	4.15798e-09	-1.75458	-1.65856	0.384974	0.57861	-5.2314	-2.13659	0.0092985	0.0365139
ENSG00000234810	RP11-90C4.1	ENST00000634769.1,ENST00000422374.1,ENST00000424357.1	lincRNA	0.231796	0.309798	2.96192	-2.62475	1	1	-5.12548e-15	-3.2253	1	1
ENSG00000223956	LINC01767	ENST00000635434.1,ENST00000451914.1	lincRNA	0.61423	0.680069	2.96192	-2.62475	1	1	-5.12548e-15	-3.2253	1	1
ENSG00000162407	PLPP3	ENST00000461655.1,ENST00000476206.1,ENST00000371250.3,ENST00000472957.1,ENST00000459962.1	processed_transcript,protein_coding	1.38799e-17	9.68291e-17	8.10536	0.0296583	1.26576e-06	6.50253e-06	-5.12548e-15	-3.2253	1	1
ENSG00000225475	RP11-377K22.2	ENST00000442812.1	processed_pseudogene	0.144122	0.212785	0.223354	-1.99528	1	1	0.729278	-1.97754	0.682097	1
ENSG00000187889	C1orf168	ENST00000493000.5,ENST00000484327.1,ENST00000343433.6,ENST00000371240.3,ENST00000497991.1	processed_transcript,retained_intron,protein_coding	0.776051	0.81884	0	-2.80372	1	1	-5.12548e-15	-3.2253	1	1
ENSG00000021852	C8B	ENST00000494324.1,ENST00000465658.1,ENST00000468990.1,ENST00000371237.8,ENST00000543257.5,ENST00000535057.5	processed_transcript,retained_intron,protein_coding	0.15829	0.230744	3.8541	-2.46383	0.312854	0.479929	-5.12548e-15	-3.2253	1	1
ENSG00000173406	DAB1	ENST00000371230.1,ENST00000489267.1,ENST00000420954.6,ENST00000485760.5,ENST00000332102.10,ENST00000371232.8,ENST00000371236.6,ENST00000473821.1,ENST00000371231.5,ENST00000414851.6,ENST00000477280.1	processed_transcript,protein_coding	1.01534e-10	4.60601e-10	-0.629909	-0.0050478	0.485219	0.711334	-7.31719	-0.66606	8.98721e-10	9.62486e-09
ENSG00000236888	RPS20P5	ENST00000434808.1	processed_pseudogene	0.174239	0.241276	3.8541	-2.46383	0.312854	0.479929	-5.12548e-15	-3.2253	1	1
ENSG00000229887	HNRNPA1P6	ENST00000394002.4,ENST00000631770.1	transcribed_unprocessed_pseudogene,processed_transcript	0.65187	0.715677	0	-2.80372	1	1	2.30487	-3.05545	1	1
ENSG00000223416	RPS26P15	ENST00000488067.1	processed_pseudogene	0.793878	0.829111	-1.93121	-2.63801	1	1	-0.0353991	-2.90329	1	1
ENSG00000162600	OMA1	ENST00000419242.5,ENST00000456980.5,ENST00000421528.6,ENST00000460671.1,ENST00000453710.1,ENST00000482274.2,ENST00000426139.5,ENST00000467509.5,ENST00000467063.1,ENST00000476933.1,ENST00000371226.7	processed_transcript,protein_coding	1.17948e-05	3.4046e-05	-1.22553	3.01951	0.000438286	0.0015494	0.670963	3.93064	0.00537068	0.0223953
ENSG00000184292	TACSTD2	ENST00000371225.3	protein_coding	3.608e-07	1.20934e-06	5.97647	-1.63187	0.00210626	0.00658695	-5.12548e-15	-3.2253	1	1
ENSG00000185839	RP4-592A1.2	ENST00000427762.1	processed_pseudogene	0.204677	0.277557	1.02851	-1.01482	0.450092	0.665971	1.13691	-0.869408	0.066424	0.202763
ENSG00000162601	MYSM1	ENST00000481973.1,ENST00000489282.1,ENST00000472487.5,ENST00000401044.7,ENST00000622766.1,ENST00000466774.5,ENST00000493821.5,ENST00000483003.5	processed_transcript,protein_coding	0.00878228	0.0168525	-1.13829	6.2093	0.0283349	0.0682204	0.390051	6.97704	0.0146005	0.0544604
ENSG00000283445	RP11-63G10.4	ENST00000636386.1,ENST00000637377.1	lincRNA	0.0326372	0.0563803	4.48841	-2.31164	0.190109	0.331684	-5.12548e-15	-3.2253	1	1
ENSG00000177606	JUN	ENST00000371222.3	protein_coding	1.65346e-76	4.83645e-75	11.656	9.95025	1.0628e-84	5.66829e-82	6.0106	4.43881	7.53453e-39	3.12312e-37
ENSG00000234807	LINC01135	ENST00000419531.2	lincRNA	1.01351e-47	1.80379e-46	9.58368	1.60937	4.14577e-23	8.38059e-22	4.36474	-2.52587	0.184445	0.461004
ENSG00000272226	RP11-63G10.3	ENST00000607372.1	lincRNA	0.0369144	0.0627395	4.4265	-2.31559	0.190109	0.331684	-5.12548e-15	-3.2253	1	1
ENSG00000232453	RP4-794H19.1	ENST00000634763.1,ENST00000635492.1,ENST00000423408.5,ENST00000427292.1,ENST00000634986.1	lincRNA	1.08209e-16	7.19743e-16	7.93445	-0.10128	2.2521e-09	1.58334e-08	3.67772	-2.76648	0.283029	0.635084
ENSG00000237352	LINC01358	ENST00000634569.1,ENST00000447329.5,ENST00000634502.1,ENST00000635072.1,ENST00000449812.2,ENST00000625548.1,ENST00000631169.2,ENST00000438195.5,ENST00000635571.1,ENST00000635515.1,ENST00000424308.1	lincRNA	5.20508e-11	2.41886e-10	1.06315	-1.24794	0.387953	0.582677	-1.38705	-1.9767	0.270542	0.631831
ENSG00000228121	PHBP3	ENST00000412562.1	processed_pseudogene	0.729158	0.784621	-1.93442	-2.63768	1	1	-0.0351495	-2.90331	1	1
ENSG00000224609	HSD52	ENST00000585367.5,ENST00000631064.2,ENST00000624265.3,ENST00000623433.3,ENST00000587839.2,ENST00000625069.3,ENST00000436225.1,ENST00000592607.4,ENST00000624582.3,ENST00000425914.6	lincRNA,retained_intron	0.000728427	0.00168556	5.4085	-1.93821	0.021767	0.0540081	-5.12548e-15	-3.2253	1	1
ENSG00000172456	FGGY	ENST00000462744.5,ENST00000493891.5,ENST00000474476.5,ENST00000371212.5,ENST00000634399.1,ENST00000475949.5,ENST00000485720.1,ENST00000634606.1,ENST00000495718.5,ENST00000582567.1,ENST00000424725.2,ENST00000466791.5,ENST00000634364.1,ENST00000635297.1,ENST00000480847.1,ENST00000583635.1,ENST00000472783.5,ENST00000371218.8,ENST00000430447.5,ENST00000476939.5,ENST00000303721.11,ENST00000471169.5,EN…	nonsense_mediated_decay,processed_transcript,retained_intron,protein_coding	2.56414e-05	7.135e-05	1.38529	2.71392	0.00295277	0.00895966	0.735359	2.43232	0.00881346	0.0348875
ENSG00000134709	HOOK1	ENST00000491135.1,ENST00000455990.5,ENST00000371208.3,ENST00000474695.1,ENST00000466803.1,ENST00000465876.5	processed_transcript,protein_coding	0.0657778	0.104799	3.8541	-2.46383	0.312854	0.479929	4.62239	-2.41878	0.0407252	0.133457
ENSG00000134716	CYP2J2	ENST00000466095.5,ENST00000469406.5,ENST00000371204.3,ENST00000468257.1,ENST00000492633.5	processed_transcript,protein_coding	0.01013	0.0192631	-0.853036	-0.481629	0.301006	0.479929	-1.08414	-0.638489	0.0870322	0.253116
ENSG00000162598	C1orf87	ENST00000450089.6,ENST00000486478.5,ENST00000488027.5,ENST00000371201.3,ENST00000491817.2	processed_transcript,protein_coding	0.61423	0.680069	2.96192	-2.62475	1	1	-5.12548e-15	-3.2253	1	1
ENSG00000229332	PGBD4P8	ENST00000412993.2	processed_pseudogene	0.00836335	0.0161085	4.78587	-2.18341	0.120517	0.232546	-5.12548e-15	-3.2253	1	1
ENSG00000226476	LINC01748	ENST00000634281.1,ENST00000634836.1,ENST00000635616.1,ENST00000635048.1,ENST00000439156.2	lincRNA	0.50776	0.60558	1.03072	-2.47703	1	1	-2.34027	-3.05521	1	1
ENSG00000231252	RP11-436K8.1	ENST00000635290.1,ENST00000634701.1,ENST00000423403.1	lincRNA	0.174239	0.241276	3.8541	-2.46383	0.312854	0.479929	-5.12548e-15	-3.2253	1	1
ENSG00000162599	NFIA	ENST00000485903.6,ENST00000371185.6,ENST00000371189.8,ENST00000371191.5,ENST00000482020.1,ENST00000371184.6,ENST00000407417.7,ENST00000371187.7,ENST00000357977.5,ENST00000476646.5,ENST00000496712.1,ENST00000479364.1,ENST00000403491.7,ENST00000493627.1	processed_transcript,protein_coding	1.8895e-132	1.10336e-130	8.20583	0.175958	4.10489e-11	3.45948e-10	12.0365	3.82453	7.34237e-77	6.99273e-75
ENSG00000270742	RP4-802A10.1	ENST00000603233.1	sense_intronic	0.000229353	0.000567485	0	-2.80372	1	1	4.06773	-2.64077	0.158698	0.408127
ENSG00000162604	TM2D1	ENST00000472989.5,ENST00000294613.9,ENST00000606498.5,ENST00000496465.1,ENST00000468586.5,ENST00000371178.5,ENST00000488410.5,ENST00000494926.5,ENST00000371180.6,ENST00000371177.2,ENST00000472357.1,ENST00000488206.5	nonsense_mediated_decay,processed_transcript,retained_intron,protein_coding	0.00158548	0.00347621	1.30201	4.91793	4.42013e-06	2.12029e-05	0.67632	4.62255	0.00226445	0.010291
ENSG00000271200	RP11-430G17.3	ENST00000605725.1	lincRNA	0.0763546	0.120001	-3.23721	-2.35666	0.541902	0.777653	-3.72176	-2.7654	0.283029	0.635084
ENSG00000132849	PATJ	ENST00000613764.4,ENST00000484562.5,ENST00000459752.5,ENST00000635137.1,ENST00000493967.1,ENST00000371158.6,ENST00000472512.2,ENST00000635023.1,ENST00000316485.11,ENST00000635214.1,ENST00000307297.8,ENST00000484937.5,ENST00000494842.2,ENST00000490547.2,ENST00000465798.2,ENST00000488913.1	nonsense_mediated_decay,processed_transcript,retained_intron,protein_coding	2.31322e-09	9.43211e-09	-1.85448	0.90807	0.00990991	0.0266754	-2.11376	0.780736	0.00766461	0.0307468
ENSG00000236646	LAMTOR5P1	ENST00000444290.1	processed_pseudogene	0.706233	0.762131	0	-2.80372	1	1	-5.12548e-15	-3.2253	1	1
ENSG00000240563	L1TD1	ENST00000498273.1	protein_coding	0.0326372	0.0563803	4.48841	-2.31164	0.190109	0.331684	-5.12548e-15	-3.2253	1	1
ENSG00000132854	KANK4	ENST00000354381.3,ENST00000371150.5,ENST00000371153.8,ENST00000317477.8	protein_coding	0.00610433	0.0122816	0.603268	-2.09812	1	1	-3.72176	-2.7654	0.283029	0.635084
ENSG00000162607	USP1	ENST00000371146.5,ENST00000452143.5,ENST00000339950.4,ENST00000442679.5	protein_coding	0.000253033	0.000622851	-1.26832	6.7916	1.65908e-06	8.39243e-06	0.296856	7.54793	0.0921522	0.265832
ENSG00000116641	DOCK7	ENST00000634223.1,ENST00000479983.1,ENST00000340370.10,ENST00000404627.3,ENST00000634495.2,ENST00000634912.1,ENST00000637431.1,ENST00000634652.1,ENST00000637487.1,ENST00000634264.1,ENST00000635983.1,ENST00000454575.6,ENST00000637144.1,ENST00000635827.1,ENST00000614472.5,ENST00000636635.1,ENST00000637208.1,ENST00000251157.10,ENST00000489185.1,ENST00000635123.1,ENST00000634929.1,ENST00000636167.1,E…	nonsense_mediated_decay,processed_transcript,retained_intron,protein_coding	0.190602	0.26082	0.25241	6.01877	0.493024	0.721521	-0.310471	5.84658	0.0670311	0.204422
ENSG00000132855	ANGPTL3	ENST00000493994.1,ENST00000482591.1,ENST00000371129.3	processed_transcript,protein_coding	0.61423	0.680069	2.96192	-2.62475	1	1	-5.12548e-15	-3.2253	1	1
ENSG00000213703	RP5-849H19.2	ENST00000258651.4	processed_pseudogene	0.224271	0.300656	-0.487589	-1.72358	0.773987	1	0.145014	-1.70162	1	1
ENSG00000125703	ATG4C	ENST00000414558.2,ENST00000371120.7,ENST00000317868.8,ENST00000371118.1,ENST00000443289.5	protein_coding	8.98868e-11	4.09099e-10	-2.70654	3.91268	2.64849e-15	3.16001e-14	0.377037	4.96196	0.0370998	0.123422
ENSG00000234318	RP4-771M4.3	ENST00000450811.1	lincRNA	0.567608	0.669572	-3.61508	-2.23477	0.312854	0.479929	-1.8057	-2.52446	0.420159	0.867919
ENSG00000237163	RP4-771M4.2	ENST00000435230.1	processed_pseudogene	0.410907	0.51302	-2.73312	-2.48948	1	1	-3.18992	-2.90309	0.52202	0.980779
ENSG00000224209	LINC00466	ENST00000418086.1,ENST00000635555.1,ENST00000635458.1,ENST00000447183.3,ENST00000634725.1,ENST00000455304.6,ENST00000436475.2,ENST00000634576.1,ENST00000635218.1,ENST00000432537.2	lincRNA,retained_intron	0.000441112	0.00105081	5.42923	-1.93621	0.0192582	0.0486012	2.30487	-3.05545	1	1
ENSG00000236674	RP4-792G4.3	ENST00000455736.1	processed_pseudogene	0.656967	0.7199	0	-2.80372	1	1	2.30487	-3.05545	1	1
ENSG00000088035	ALG6	ENST00000371108.8,ENST00000494765.1,ENST00000462390.1,ENST00000263440.4,ENST00000603108.5,ENST00000487136.2,ENST00000465969.5	nonsense_mediated_decay,processed_transcript,protein_coding	2.52269e-05	7.02148e-05	-2.24121	4.09302	3.13935e-08	1.95104e-07	-0.612389	4.60754	0.00378884	0.0164219
ENSG00000142856	ITGB3BP	ENST00000476508.5,ENST00000271002.14,ENST00000371092.7,ENST00000489099.5,ENST00000463803.5,ENST00000461681.5,ENST00000489863.5,ENST00000465781.5,ENST00000460394.5,ENST00000460251.5,ENST00000462285.5,ENST00000492655.1,ENST00000478538.1,ENST00000478138.1	nonsense_mediated_decay,processed_transcript,protein_coding	0.000611247	0.00143024	-1.01765	4.49392	0.00137375	0.00443502	0.139028	5.0742	0.435304	0.891559
ENSG00000203965	EFCAB7	ENST00000371088.4,ENST00000461039.1,ENST00000496956.1,ENST00000493605.1,ENST00000480886.1,ENST00000460678.6	processed_transcript,protein_coding	0.587425	0.680069	-0.529016	3.16193	0.29493	0.479929	-0.433836	3.28094	0.0916163	0.264883
ENSG00000116652	DLEU2L	ENST00000371086.3	sense_intronic	0.039675	0.0663011	-1.35962	0.849137	0.0259627	0.0629113	-0.148401	1.23461	0.744159	1
ENSG00000079739	PGM1	ENST00000371083.4,ENST00000540265.5,ENST00000371084.7,ENST00000483707.1,ENST00000473117.2	processed_transcript,protein_coding	3.41932e-05	9.37604e-05	-0.555732	4.86857	0.074993	0.1599	0.451363	5.45905	0.0109717	0.0423208
ENSG00000185483	ROR1	ENST00000371079.5,ENST00000545203.2,ENST00000371080.5,ENST00000482426.1	processed_transcript,protein_coding	2.13824e-38	3.06009e-37	5.82701	1.80628	8.1293e-20	1.357e-18	2.53085	-0.768528	0.000512611	0.00266724
ENSG00000177452	RP4-597J3.1	ENST00000418154.1	processed_pseudogene	0.770289	0.817364	0	-2.80372	1	1	-5.12548e-15	-3.2253	1	1
ENSG00000228056	CFL1P3	ENST00000440942.1	processed_pseudogene	0.683258	0.742896	0	-2.80372	1	1	2.30487	-3.05545	1	1
ENSG00000158966	CACHD1	ENST00000486580.1,ENST00000470527.1,ENST00000495994.5,ENST00000290039.5	processed_transcript,retained_intron,protein_coding	4.56104e-40	6.84263e-39	3.82579	4.80222	4.21351e-31	1.31415e-29	0.622885	2.38339	0.1166	0.322156
ENSG00000162437	RAVER2	ENST00000294428.7,ENST00000418058.1,ENST00000371072.8	nonsense_mediated_decay,protein_coding	3.30559e-30	3.7684e-29	-3.34939	5.76864	4.45863e-25	1.01621e-23	-1.03009	6.29824	4.05912e-11	4.8449e-10
ENSG00000162434	JAK1	ENST00000494904.1,ENST00000342505.4,ENST00000471473.1,ENST00000465376.5,ENST00000481702.1,ENST00000467764.1	processed_transcript,protein_coding	2.1408e-08	8.02456e-08	-0.826197	7.61692	0.00231007	0.00716508	-0.942686	7.68025	1.24993e-09	1.32267e-08
ENSG00000233877	RP11-182I10.2	ENST00000446914.2	processed_pseudogene	0.61423	0.680069	2.96192	-2.62475	1	1	-5.12548e-15	-3.2253	1	1
ENSG00000226891	LINC01359	ENST00000436350.2,ENST00000447748.5,ENST00000635626.1,ENST00000634775.1,ENST00000415842.5,ENST00000444349.5,ENST00000634799.1,ENST00000635398.1,ENST00000634604.1	lincRNA,retained_intron	2.62501e-09	1.06532e-08	-1.31132	0.617899	0.0319751	0.0761425	-1.21241	0.585054	0.0578536	0.180074
ENSG00000185031	SLC2A3P2	ENST00000331747.6	processed_pseudogene	2.32872e-06	7.23346e-06	-5.43648	-1.33279	0.00702031	0.0196201	-1.12237	-1.31775	0.430781	0.884425
ENSG00000272506	RP4-535B20.4	ENST00000607528.1	lincRNA	8.36242e-05	0.000218697	-3.61731	-2.23446	0.312854	0.479929	0.511303	-2.05587	0.795532	1
ENSG00000231485	RP4-535B20.1	ENST00000448344.1	lincRNA	0.000318319	0.000773418	-0.144183	-0.321002	1	1	0.0557418	-0.225797	0.926898	1
ENSG00000162433	AK4	ENST00000546702.5,ENST00000327299.7,ENST00000545314.5,ENST00000479060.1,ENST00000497030.5,ENST00000474968.5,ENST00000395334.6,ENST00000470888.6	processed_transcript,protein_coding	9.52296e-19	6.98933e-18	-2.65994	5.26212	7.26434e-20	1.21579e-18	-0.0660489	6.10188	0.723305	1
ENSG00000231622	RPS29P7	ENST00000439662.1	processed_pseudogene	0.0959643	0.147432	-5.23532	-1.45778	0.0125303	0.0330044	-0.279975	-1.22496	0.857891	1
ENSG00000116675	DNAJC6	ENST00000263441.11,ENST00000371069.4,ENST00000498720.1,ENST00000494710.6,ENST00000463018.5,ENST00000472787.1,ENST00000483402.1,ENST00000395325.7	processed_transcript,protein_coding	2.41727e-59	5.31634e-58	-2.74476	4.67378	6.3721e-20	1.0715e-18	-2.93705	4.72461	2.20248e-39	9.31036e-38
ENSG00000213625	LEPROT	ENST00000371065.8,ENST00000488747.5,ENST00000475108.5,ENST00000484243.1,ENST00000497874.5,ENST00000613538.1	processed_transcript,protein_coding	3.09502e-13	1.66819e-12	-2.60123	4.33802	6.02975e-09	4.05703e-08	0.105962	5.23918	0.64442	1
ENSG00000116678	LEPR	ENST00000371058.1,ENST00000616738.4,ENST00000344610.12,ENST00000349533.10,ENST00000371059.7,ENST00000471762.1,ENST00000462765.5,ENST00000371060.7	processed_transcript,protein_coding	1.36612e-13	7.51521e-13	-2.59008	1.35743	7.52669e-06	3.49621e-05	-1.5387	1.47462	9.29533e-05	0.000545881
ENSG00000237852	RP4-630A11.3	ENST00000429871.1	sense_intronic	0.0243802	0.0433714	-4.37819	-1.92275	0.139865	0.266045	-2.57383	-2.22442	0.167442	0.425724
ENSG00000224570	RP11-430H12.2	ENST00000426714.1	processed_pseudogene	0.160252	0.2309	3.9239	-2.4599	0.312854	0.479929	-5.12548e-15	-3.2253	1	1
ENSG00000184588	PDE4B	ENST00000423207.6,ENST00000480109.2,ENST00000534463.5,ENST00000528771.5,ENST00000491340.2,ENST00000371045.9,ENST00000341517.8,ENST00000531358.1,ENST00000532040.1,ENST00000412480.6,ENST00000526197.5,ENST00000531025.5,ENST00000526666.1,ENST00000524999.1,ENST00000483863.2,ENST00000490695.1,ENST00000329654.8,ENST00000371048.7	processed_transcript,retained_intron,protein_coding	1.97057e-14	1.14526e-13	-2.88819	2.73453	3.72601e-09	2.56524e-08	-1.46687	3.00163	0.00208833	0.00956991
ENSG00000118473	SGIP1	ENST00000480548.5,ENST00000484988.2,ENST00000371039.5,ENST00000424320.5,ENST00000371037.8,ENST00000468570.1,ENST00000487507.1,ENST00000320161.10,ENST00000435165.2,ENST00000237247.10,ENST00000497055.1,ENST00000483060.1,ENST00000493564.1,ENST00000468286.5	processed_transcript,protein_coding	1.1038e-17	7.73242e-17	0.570819	-0.924388	0.577814	0.823868	-5.7502	-1.83119	0.000570433	0.00294085
ENSG00000152760	TCTEX1D1	ENST00000528352.1,ENST00000489510.1,ENST00000448074.1,ENST00000491611.1,ENST00000525663.5,ENST00000282670.6	nonsense_mediated_decay,processed_transcript,retained_intron,protein_coding	9.40396e-237	2.16494e-234	-9.37363	4.59718	2.31961e-49	1.8193e-47	-10.577	4.66094	4.20941e-76	3.97349e-74
ENSG00000152763	WDR78	ENST00000371023.7,ENST00000493572.1,ENST00000531980.5,ENST00000491297.6,ENST00000474506.1,ENST00000488333.2,ENST00000371022.3,ENST00000464352.6,ENST00000469450.1,ENST00000532629.1,ENST00000371026.7,ENST00000531552.1	nonsense_mediated_decay,processed_transcript,protein_coding	1.54501e-15	9.58146e-15	2.93687	2.97564	1.13524e-12	1.10419e-11	0.23035	1.21571	0.664309	1
ENSG00000198160	MIER1	ENST00000401042.7,ENST00000355356.3,ENST00000371014.5,ENST00000401041.5,ENST00000357692.6,ENST00000479067.1,ENST00000371012.6,ENST00000493357.1,ENST00000355977.10,ENST00000371016.5,ENST00000371018.7	processed_transcript,protein_coding	5.63782e-08	2.04176e-07	-2.04785	5.86185	2.35628e-07	1.32398e-06	-0.414073	6.45027	0.0312459	0.10629
ENSG00000116704	SLC35D1	ENST00000235345.5	protein_coding	0.558319	0.65983	0.0997771	5.46721	0.720678	0.989306	-0.0229038	5.51141	0.910211	1
ENSG00000162594	IL23R	ENST00000395227.2,ENST00000473881.2,ENST00000347310.9,ENST00000425614.3,ENST00000637002.1	nonsense_mediated_decay,protein_coding	1.33128e-153	9.79333e-152	13.01	5.18854	1.78555e-23	3.71506e-22	13.9277	5.70614	1.60758e-94	2.07429e-92
ENSG00000228523	RP11-131O15.2	ENST00000432257.1	processed_pseudogene	4.73165e-15	2.85792e-14	6.7739	-1.02506	0.0155682	0.0402571	7.91265	-0.123765	9.4689e-11	1.09982e-09
ENSG00000081985	IL12RB2	ENST00000544434.5,ENST00000441640.3,ENST00000541374.5,ENST00000371000.5,ENST00000465396.1,ENST00000262345.5	processed_transcript,protein_coding	1.59134e-76	4.66327e-75	7.06857	1.85908	1.17963e-22	2.30876e-21	7.50457	2.50889	7.17363e-35	2.65998e-33
ENSG00000142864	SERBP1	ENST00000484880.1,ENST00000462814.1,ENST00000370990.5,ENST00000370995.6,ENST00000370994.8,ENST00000490406.1,ENST00000493607.1,ENST00000361219.10	processed_transcript,protein_coding	1.25309e-05	3.6099e-05	-1.43181	8.2363	7.41572e-07	3.92821e-06	0.578117	9.20338	0.000339915	0.00181834
ENSG00000238139	RP11-393N21.1	ENST00000414338.2	processed_pseudogene	0.7004	0.757445	0	-2.80372	1	1	-5.12548e-15	-3.2253	1	1
ENSG00000116717	GADD45A	ENST00000370985.3,ENST00000460575.1,ENST00000617962.1,ENST00000484245.1,ENST00000370986.8	processed_transcript,protein_coding	9.26117e-135	5.59165e-133	3.68361	7.00772	1.29303e-34	4.90829e-33	-2.61538	3.5555	1.84409e-12	2.45879e-11
ENSG00000172380	GNG12	ENST00000494936.1,ENST00000370982.3	processed_transcript,protein_coding	1.9422e-63	4.59013e-62	10.5992	2.70282	7.71782e-23	1.53302e-21	8.84947	0.729991	1.18225e-16	2.07753e-15
ENSG00000235055	RP4-609E1.2	ENST00000435784.2	processed_pseudogene	0.00737765	0.0144953	4.84104	-2.17945	0.0791691	0.163057	2.30325	-3.05558	1	1
ENSG00000162595	DIRAS3	ENST00000370981.1	protein_coding	0.0166061	0.0304542	4.8965	-2.17547	0.0791691	0.163057	-5.12548e-15	-3.2253	1	1
ENSG00000116729	WLS	ENST00000370971.1,ENST00000533537.5,ENST00000262348.8,ENST00000471243.2,ENST00000497187.5,ENST00000370973.2,ENST00000498615.1,ENST00000527864.1,ENST00000370976.7,ENST00000354777.6,ENST00000491076.1,ENST00000530486.5,ENST00000491811.5,ENST00000534713.5	nonsense_mediated_decay,processed_transcript,protein_coding	2.05711e-73	5.7043e-72	8.31097	2.32416	4.26101e-28	1.14294e-26	5.37185	-0.276895	1.69892e-10	1.93196e-09
ENSG00000234383	CTBP2P8	ENST00000422584.1	processed_pseudogene	0.00514793	0.0104673	1.24842	-1.77962	0.399758	0.598665	-0.42968	-2.31829	1	1
ENSG00000229133	RPS7P4	ENST00000444127.1	processed_pseudogene	0.77626	0.81884	1.03072	-2.47703	1	1	-0.0353991	-2.90329	1	1
ENSG00000116745	RPE65	ENST00000262340.5	protein_coding	0.00836335	0.0161085	4.78587	-2.18341	0.120517	0.232546	-5.12548e-15	-3.2253	1	1
ENSG00000024526	DEPDC1	ENST00000525124.1,ENST00000488146.5,ENST00000489862.1,ENST00000370966.9,ENST00000456315.6	nonsense_mediated_decay,retained_intron,protein_coding	6.387e-08	2.29852e-07	-2.56609	4.69639	4.06999e-13	4.10981e-12	0.209911	5.65584	0.252892	0.598073
ENSG00000033122	LRRC7	ENST00000441830.1,ENST00000565615.1,ENST00000608470.5,ENST00000608815.5,ENST00000609498.5,ENST00000607936.5,ENST00000035383.9,ENST00000310961.9,ENST00000415775.2,ENST00000588515.5,ENST00000370958.5,ENST00000608744.5,ENST00000609072.5	nonsense_mediated_decay,processed_transcript,retained_intron,protein_coding	0.068641	0.109008	0.777393	-1.88695	0.757207	1	-4.10907	-2.63973	0.158698	0.408127
ENSG00000229359	PIN1P1	ENST00000439639.2,ENST00000412108.1	transcribed_processed_pseudogene,processed_transcript	0.0441661	0.0730094	4.39582	-2.31757	0.190109	0.331684	-5.12548e-15	-3.2253	1	1
ENSG00000066557	LRRC40	ENST00000370952.3	protein_coding	0.460898	0.56098	-0.521346	5.17637	0.288855	0.479929	-0.0253572	5.49897	0.88465	1
ENSG00000116754	SRSF11	ENST00000484162.5,ENST00000486667.5,ENST00000469170.5,ENST00000481648.5,ENST00000370951.5,ENST00000463116.1,ENST00000463859.5,ENST00000395136.6,ENST00000370949.1,ENST00000475204.5,ENST00000463877.1,ENST00000489188.1,ENST00000460795.5,ENST00000461935.1,ENST00000370950.7,ENST00000473950.5	nonsense_mediated_decay,processed_transcript,protein_coding	0.0357834	0.0611355	-0.856888	7.40651	0.0114502	0.030445	0.228084	7.99473	0.143577	0.383767
ENSG00000118454	ANKRD13C	ENST00000464236.1,ENST00000490846.5,ENST00000262346.6,ENST00000370944.8,ENST00000498735.1	processed_transcript,protein_coding	0.0606032	0.0972911	1.0139	5.64663	9.3972e-05	0.000371293	0.23267	5.28668	0.173303	0.43812
ENSG00000197568	HHLA3	ENST00000525653.1,ENST00000531950.1,ENST00000370940.5,ENST00000361764.8,ENST00000463058.5,ENST00000359875.9,ENST00000486110.1	nonsense_mediated_decay,processed_transcript,protein_coding	5.54491e-06	1.66046e-05	1.26091	1.68306	0.00228453	0.00708932	0.913719	1.6282	0.0101016	0.0393
ENSG00000116761	CTH	ENST00000482383.1,ENST00000346806.2,ENST00000464926.1,ENST00000411986.6,ENST00000370938.7	processed_transcript,protein_coding	1.53998e-44	2.56796e-43	3.70734	6.1766	8.73062e-29	2.40223e-27	0.731982	3.90028	0.153051	0.404623
ENSG00000271992	RP11-42O15.3	ENST00000607679.1	lincRNA	0.0938827	0.144511	-0.52266	-0.865581	0.604173	0.856739	0.900505	-0.297323	0.282687	0.635084
ENSG00000233020	RP11-42O15.2	ENST00000456361.1	processed_pseudogene	0.26838	0.353263	2.96192	-2.62475	1	1	-5.12548e-15	-3.2253	1	1
ENSG00000229051	LINC01788	ENST00000419450.1	lincRNA	0.160252	0.2309	3.9239	-2.4599	0.312854	0.479929	-5.12548e-15	-3.2253	1	1
ENSG00000226208	RP11-99H8.1	ENST00000423187.1	lincRNA	0.61423	0.680069	2.96192	-2.62475	1	1	-5.12548e-15	-3.2253	1	1
ENSG00000050628	PTGER3	ENST00000351052.9,ENST00000354608.9,ENST00000306666.9,ENST00000497146.5,ENST00000356595.8,ENST00000370924.4,ENST00000370931.7,ENST00000370932.6,ENST00000628037.2,ENST00000460330.5,ENST00000361210.6,ENST00000479353.5	nonsense_mediated_decay,protein_coding	7.68232e-119	3.88364e-117	12.137	4.29145	4.71704e-46	3.08682e-44	4.06773	-2.64077	0.158698	0.408127
ENSG00000132485	ZRANB2	ENST00000611683.1,ENST00000479947.1,ENST00000254821.10,ENST00000473260.1,ENST00000487510.1,ENST00000477096.1,ENST00000370920.7	processed_transcript,protein_coding	0.94981	0.953595	0.255489	7.58907	0.496264	0.725996	0.22927	7.68121	0.148113	0.393879
ENSG00000229956	ZRANB2-AS2	ENST00000600103.1,ENST00000628450.2,ENST00000628683.2,ENST00000627902.2,ENST00000627548.2,ENST00000413421.5,ENST00000625896.2,ENST00000630994.2,ENST00000630350.2,ENST00000626344.2,ENST00000628797.2,ENST00000599146.5,ENST00000630885.2,ENST00000628670.2,ENST00000627516.2,ENST00000594152.5,ENST00000411721.1,ENST00000583678.5,ENST00000628635.2,ENST00000626510.2,ENST00000634641.1,ENST00000630926.2	lincRNA	0.00113071	0.00254165	1.41755	-0.09807	0.142165	0.269954	1.42238	0.0929138	0.0103864	0.0402866
ENSG00000172260	NEGR1	ENST00000357731.9,ENST00000467479.1,ENST00000474357.1,ENST00000306821.3,ENST00000478526.1	processed_transcript,protein_coding	2.99541e-31	3.52013e-30	5.06921	3.1419	4.8131e-30	1.41692e-28	4.16136	2.47983	4.29696e-05	0.000266685
ENSG00000228853	NEGR1-IT1	ENST00000453121.1	sense_intronic	0.21261	0.287069	0	-2.80372	1	1	3.67911	-2.76635	0.283029	0.635084
ENSG00000233994	GDI2P2	ENST00000445131.2	processed_pseudogene	0.681959	0.741638	-0.948042	-2.00695	1	1	-0.733804	-2.22494	0.745017	1
ENSG00000227207	RPL31P12	ENST00000422587.2	processed_pseudogene	0.31819	0.411879	-3.23721	-2.35666	0.541902	0.777653	0.641818	-2.22584	0.852648	1
ENSG00000229636	KRT8P21	ENST00000430398.2	processed_pseudogene	0.61423	0.680069	2.96192	-2.62475	1	1	-5.12548e-15	-3.2253	1	1
ENSG00000162620	LRRIQ3	ENST00000370911.7,ENST00000354431.8,ENST00000468759.1,ENST00000417067.5,ENST00000463724.1,ENST00000370909.6,ENST00000444984.1,ENST00000415760.5,ENST00000395089.5,ENST00000495179.1	nonsense_mediated_decay,processed_transcript,retained_intron,protein_coding	0.981373	0.982785	0.0742977	1.49744	0.874087	1	0.220293	1.66276	0.543046	1
ENSG00000254685	FPGT	ENST00000472069.1,ENST00000370894.9,ENST00000529485.5,ENST00000482102.2,ENST00000534056.5,ENST00000524915.5,ENST00000370898.7,ENST00000467578.6	nonsense_mediated_decay,processed_transcript,protein_coding	2.65063e-05	7.36478e-05	-2.31157	3.04309	4.33819e-11	3.64937e-10	0.361218	3.99373	0.083324	0.243771
ENSG00000259030	FPGT-TNNI3K	ENST00000370895.5,ENST00000533006.1,ENST00000370893.1,ENST00000370899.7,ENST00000557284.6,ENST00000534632.5	processed_transcript,protein_coding	0.386733	0.488666	0.370403	-1.33738	1	1	1.01289	-1.05658	0.138206	0.37199
ENSG00000116783	TNNI3K	ENST00000525480.2,ENST00000534020.5,ENST00000526236.5,ENST00000530184.1,ENST00000465473.1,ENST00000370889.2,ENST00000497284.1,ENST00000326637.7	processed_transcript,retained_intron,protein_coding	0.699247	0.756429	-2.72752	-2.49013	1	1	-0.887136	-2.76576	1	1
ENSG00000162621	LRRC53	ENST00000294635.4	protein_coding	0.17224	0.241276	3.8541	-2.46383	0.312854	0.479929	-5.12548e-15	-3.2253	1	1
ENSG00000178965	ERICH3	ENST00000614534.1,ENST00000479666.1,ENST00000433746.2,ENST00000420661.6,ENST00000326665.9	nonsense_mediated_decay,processed_transcript,protein_coding	0.035454	0.0606149	2.40967	-1.85746	0.140718	0.267444	-3.18992	-2.90309	0.52202	0.980779
ENSG00000272864	RP11-17E13.2	ENST00000608748.1	lincRNA	0.00150434	0.00330647	-4.15484	-2.02034	0.275718	0.463465	-0.602917	-2.05514	0.852555	1
ENSG00000116791	CRYZ	ENST00000441120.1,ENST00000340866.9,ENST00000370871.7,ENST00000417775.5,ENST00000370870.5,ENST00000370872.7,ENST00000492102.1	processed_transcript,protein_coding	2.55347e-13	1.38423e-12	-2.95692	3.60304	1.12226e-16	1.49138e-15	-0.0579377	4.44126	0.779543	1
ENSG00000162623	TYW3	ENST00000486467.1,ENST00000467646.1,ENST00000479111.5,ENST00000485401.5,ENST00000457880.6,ENST00000449696.3,ENST00000370867.7,ENST00000483990.1	processed_transcript,protein_coding	0.00105213	0.00237534	-1.14481	4.96091	0.000968046	0.00322246	0.468637	5.76804	0.0510263	0.161876
ENSG00000162624	LHX8	ENST00000607240.1,ENST00000294638.9,ENST00000356261.3	retained_intron,protein_coding	0.805448	0.829111	0	-2.80372	1	1	-5.12548e-15	-3.2253	1	1
ENSG00000137968	SLC44A5	ENST00000370855.5,ENST00000469525.1,ENST00000370859.7	processed_transcript,protein_coding	2.49715e-60	5.6037e-59	-0.218062	2.93058	0.579937	0.826306	-6.65221	2.14744	2.39398e-36	9.28573e-35
ENSG00000230863	RP4-595K12.2	ENST00000446582.2	processed_pseudogene	0.119957	0.180514	-1.93121	-2.63801	1	1	-2.34027	-3.05521	1	1
ENSG00000117054	ACADM	ENST00000528016.1,ENST00000473018.2,ENST00000529059.5,ENST00000526930.1,ENST00000370841.8,ENST00000532509.5,ENST00000525881.5,ENST00000526129.5,ENST00000534334.5,ENST00000530953.6,ENST00000481374.1,ENST00000532207.5,ENST00000526196.5,ENST00000534146.5,ENST00000420607.6,ENST00000541113.5,ENST00000525808.5,ENST00000370834.9	nonsense_mediated_decay,processed_transcript,retained_intron,protein_coding	1.51519e-10	6.79268e-10	-2.28928	5.27072	4.26847e-11	3.59355e-10	-0.0267859	6.07582	0.866156	1
ENSG00000181227	DLSTP1	ENST00000444241.1	processed_pseudogene	0.720764	0.776241	1.72114	-2.08108	0.435147	0.646218	1.64748	-2.13832	0.234423	0.56225
ENSG00000137955	RABGGTB	ENST00000489450.1,ENST00000461653.5,ENST00000471759.5,ENST00000473406.5,ENST00000462042.5,ENST00000496055.5,ENST00000467748.1,ENST00000470201.5,ENST00000319942.7,ENST00000370826.3,ENST00000485459.5,ENST00000491266.5,ENST00000497648.1,ENST00000459697.1	processed_transcript,protein_coding	0.0298499	0.0523137	0.483144	7.2852	0.284168	0.476388	0.825188	7.60117	6.32963e-07	5.00985e-06
ENSG00000057468	MSH4	ENST00000263187.3	protein_coding	3.05638e-05	8.4263e-05	-2.49402	0.162209	0.000931529	0.00310607	0.393598	0.902358	0.308683	0.680106
ENSG00000154007	ASB17	ENST00000284142.6	protein_coding	0.61423	0.680069	2.96192	-2.62475	1	1	-5.12548e-15	-3.2253	1	1
ENSG00000225605	RP11-550H2.1	ENST00000436121.2,ENST00000635455.1	lincRNA	0.457179	0.558174	2.96192	-2.62475	1	1	-5.12548e-15	-3.2253	1	1
ENSG00000230027	RP11-550H2.2	ENST00000434540.1	lincRNA	0.797688	0.829111	0	-2.80372	1	1	-5.12548e-15	-3.2253	1	1
ENSG00000184005	ST6GALNAC3	ENST00000464140.1,ENST00000328299.3,ENST00000621530.1	processed_transcript,protein_coding	6.77335e-64	1.62357e-62	-4.89342	2.46085	7.24846e-20	1.21377e-18	-10.5783	2.37593	2.39205e-44	1.16508e-42
ENSG00000272855	RP5-1102E8.3	ENST00000608243.1	lincRNA	0.36662	0.465586	-1.93442	-2.63768	1	1	-2.34002	-3.05523	1	1
ENSG00000226415	TPI1P1	ENST00000420977.1	processed_pseudogene	0.000163707	0.000411648	1.18738	-0.0524656	0.0749476	0.159814	0.490751	-0.272057	0.322688	0.704752
ENSG00000117069	ST6GALNAC5	ENST00000496845.1,ENST00000488940.1,ENST00000480428.1,ENST00000477717.5,ENST00000318803.6	nonsense_mediated_decay,processed_transcript,protein_coding	1.9716e-05	5.54599e-05	5.80151	-1.72928	0.0057266	0.0162543	-5.12548e-15	-3.2253	1	1
ENSG00000142892	PIGK	ENST00000478391.1,ENST00000487906.5,ENST00000445065.5,ENST00000370812.7,ENST00000359130.1	nonsense_mediated_decay,processed_transcript,protein_coding	9.45324e-09	3.66805e-08	-2.22588	4.87307	7.05894e-10	5.21677e-09	-0.0590766	5.64628	0.721115	1
ENSG00000226084	RP4-706A16.3	ENST00000471722.1	processed_pseudogene	2.06742e-05	5.80329e-05	0.558562	-0.12773	0.446745	0.661526	1.56614	0.60255	0.00061971	0.00316869
ENSG00000228187	RP11-363H12.1	ENST00000458048.1	processed_pseudogene	0.61423	0.680069	2.96192	-2.62475	1	1	-5.12548e-15	-3.2253	1	1
ENSG00000154027	AK5	ENST00000531672.1,ENST00000354567.6,ENST00000466393.1,ENST00000478255.1,ENST00000530826.1,ENST00000344720.9,ENST00000317704.8,ENST00000524494.1,ENST00000478407.1,ENST00000527263.1,ENST00000466114.1,ENST00000465146.5,ENST00000469394.1	nonsense_mediated_decay,processed_transcript,retained_intron,protein_coding	1.75187e-93	6.47343e-92	11.3579	3.48841	5.85192e-49	4.45861e-47	6.57779	-1.22829	1.04496e-06	8.0614e-06
ENSG00000036549	ZZZ3	ENST00000458763.2,ENST00000370801.7,ENST00000476195.5,ENST00000463166.5,ENST00000481346.5,ENST00000474746.1,ENST00000414381.5,ENST00000476275.5,ENST00000469944.1,ENST00000370798.5,ENST00000433749.5	processed_transcript,protein_coding	0.193916	0.264743	-0.258184	6.09641	0.384382	0.577964	0.427059	6.55299	0.005774	0.0239027
ENSG00000077254	USP33	ENST00000525113.5,ENST00000481579.5,ENST00000524536.5,ENST00000370793.5,ENST00000528150.1,ENST00000498328.1,ENST00000477949.1,ENST00000527390.1,ENST00000530709.5,ENST00000461986.5,ENST00000531637.5,ENST00000357428.5,ENST00000462192.1,ENST00000524778.1,ENST00000533928.1,ENST00000472462.1,ENST00000370792.7,ENST00000370794.7	nonsense_mediated_decay,processed_transcript,retained_intron,protein_coding	0.65905	0.72195	-0.258174	6.68181	0.564516	0.806775	-0.23518	6.79677	0.162502	0.415839
ENSG00000180488	MIGA1	ENST00000370791.7,ENST00000443751.3,ENST00000476203.2,ENST00000477627.2	retained_intron,protein_coding	0.902374	0.908992	-0.174146	4.79284	0.679794	0.942069	0.0958907	5.02716	0.666939	1
ENSG00000219201	RP11-181C21.4	ENST00000427577.1	processed_pseudogene	0.00392629	0.00812213	-1.88552	-0.583648	0.0447471	0.101705	-2.47156	-0.864821	0.000464931	0.0024338
ENSG00000235613	NSRP1P1	ENST00000444067.2	processed_pseudogene	0.00367368	0.00764341	-3.02212	-0.210227	0.000591095	0.00203758	-0.0115673	0.313699	1	1
ENSG00000232015	HSPE1P25	ENST00000455484.2	processed_pseudogene	0.0147631	0.0273311	-4.55431	-1.83447	0.113495	0.222784	1.01967	-1.18201	0.180356	0.453086
ENSG00000162614	NEXN	ENST00000470735.1,ENST00000440324.5,ENST00000401035.7,ENST00000464998.1,ENST00000342754.5,ENST00000334785.11,ENST00000330010.12,ENST00000480732.2	processed_transcript,retained_intron,protein_coding	2.74129e-08	1.01966e-07	-2.66565	-0.4632	0.0081605	0.022502	2.11471	1.33103	0.000387158	0.00205151
ENSG00000162613	FUBP1	ENST00000492724.1,ENST00000480673.5,ENST00000294623.8,ENST00000421641.1,ENST00000492405.5,ENST00000488814.5,ENST00000489495.5,ENST00000370767.5,ENST00000483894.5,ENST00000474632.5,ENST00000470287.1,ENST00000487684.1,ENST00000370768.6	nonsense_mediated_decay,processed_transcript,protein_coding	0.261651	0.345827	0.189275	7.65173	0.628733	0.887728	0.447208	7.9008	0.0125802	0.0478848
ENSG00000162616	DNAJB4	ENST00000477671.2,ENST00000476396.1,ENST00000370763.5,ENST00000426517.1,ENST00000484662.1,ENST00000487931.1	processed_transcript,protein_coding	1.80934e-09	7.43343e-09	1.74246	5.13044	4.10496e-07	2.24047e-06	-0.232586	4.02382	0.319038	0.698256
ENSG00000137960	GIPC2	ENST00000476882.1,ENST00000370759.3	processed_transcript,protein_coding	0.565232	0.667113	0.647616	-2.09586	1	1	-0.0412999	-2.41785	1	1
ENSG00000213560	RP11-386I14.3	ENST00000448345.2	processed_pseudogene	0.779382	0.81884	0	-2.80372	1	1	-5.12548e-15	-3.2253	1	1
ENSG00000237413	MGC27382	ENST00000436742.5	lincRNA	0.61423	0.680069	2.96192	-2.62475	1	1	-5.12548e-15	-3.2253	1	1
ENSG00000122420	PTGFR	ENST00000497923.5,ENST00000370756.3,ENST00000370757.7,ENST00000370758.5	nonsense_mediated_decay,protein_coding	0.373648	0.473647	2.96192	-2.62475	1	1	-5.12548e-15	-3.2253	1	1
ENSG00000137959	IFI44L	ENST00000459784.5,ENST00000476521.5,ENST00000452835.1,ENST00000450498.1,ENST00000370751.9,ENST00000476876.5,ENST00000462041.1,ENST00000474002.1,ENST00000486882.5,ENST00000494910.1	processed_transcript,retained_intron,protein_coding	0.000111878	0.000287121	-0.98	-1.50028	0.605466	0.858246	-3.07541	-1.97605	0.018574	0.0674623
ENSG00000137965	IFI44	ENST00000476911.1,ENST00000470323.5,ENST00000438486.1,ENST00000485662.1,ENST00000467790.5,ENST00000370747.8,ENST00000495254.5,ENST00000472152.5,ENST00000446486.1	processed_transcript,protein_coding	9.3988e-40	1.38984e-38	-5.03375	2.56964	2.62777e-21	4.79411e-20	-4.89089	2.54549	6.07071e-27	1.75963e-25
ENSG00000238015	RP4-641G12.3	ENST00000427236.2	processed_pseudogene	0.422309	0.523612	0	-2.80372	1	1	2.30487	-3.05545	1	1
ENSG00000235400	RP4-641G12.4	ENST00000444644.1	processed_pseudogene	0.808798	0.829111	0	-2.80372	1	1	-5.12548e-15	-3.2253	1	1
ENSG00000162618	ADGRL4	ENST00000640664.1,ENST00000401034.7,ENST00000370742.3	nonsense_mediated_decay,protein_coding	0.814316	0.830765	0	-2.80372	1	1	2.30325	-3.05558	1	1
ENSG00000230787	PSAT1P3	ENST00000439132.1	processed_pseudogene	0.175502	0.242804	3.8541	-2.46383	0.312854	0.479929	3.14856	-2.90378	0.52202	0.980779
ENSG00000235011	RP4-726F1.1	ENST00000415629.2	lincRNA	0.160252	0.2309	3.9239	-2.4599	0.312854	0.479929	-5.12548e-15	-3.2253	1	1
ENSG00000232676	ADH5P2	ENST00000425922.1	processed_pseudogene	0.814432	0.830765	0	-2.80372	1	1	2.30487	-3.05545	1	1
ENSG00000213559	HNRNPA1P64	ENST00000411674.2	processed_pseudogene	0.60401	0.680069	3.00207	-2.62279	1	1	-5.12548e-15	-3.2253	1	1
ENSG00000234184	LINC01781	ENST00000443565.1,ENST00000418041.5,ENST00000443104.5	lincRNA	0.0311772	0.0543846	0	-2.80372	1	1	4.37064	-2.52562	0.0777751	0.230388
ENSG00000229752	RPL7P10	ENST00000417407.1	processed_pseudogene	0.326336	0.4213	0.243986	-1.99468	1	1	0.260765	-2.13813	1	1
ENSG00000235089	RP3-445O10.1	ENST00000426688.1	processed_pseudogene	0.0585729	0.0943393	0.300612	-1.9908	1	1	-4.10887	-2.63975	0.158698	0.408127
ENSG00000117114	ADGRL2	ENST00000370727.5,ENST00000370725.5,ENST00000464551.1,ENST00000468283.1,ENST00000402328.2,ENST00000469377.6,ENST00000370721.5,ENST00000319517.10,ENST00000370728.5,ENST00000492666.1,ENST00000498776.1,ENST00000472424.1,ENST00000370713.5,ENST00000464775.5,ENST00000370715.5,ENST00000370717.6,ENST00000370723.5,ENST00000449420.5,ENST00000473719.5,ENST00000359929.7,ENST00000370730.5,ENST00000627151.2	processed_transcript,protein_coding	4.97475e-106	2.13108e-104	9.73723	1.77863	4.53346e-23	9.14119e-22	11.534	3.32766	8.92185e-39	3.69339e-37
ENSG00000227288	RP5-837I24.1	ENST00000448213.2	processed_pseudogene	0.0915858	0.141282	3.759	-1.73605	0.0248749	0.0605827	-0.0353991	-2.90329	1	1
ENSG00000215875	ST13P20	ENST00000447996.2	transcribed_processed_pseudogene	0.808798	0.829111	0	-2.80372	1	1	-5.12548e-15	-3.2253	1	1
ENSG00000230817	LINC01362	ENST00000419658.1,ENST00000452901.5	lincRNA	0.174239	0.241276	3.8541	-2.46383	0.312854	0.479929	-5.12548e-15	-3.2253	1	1
ENSG00000236268	LINC01361	ENST00000452834.5,ENST00000421931.1	lincRNA	0.805448	0.829111	0	-2.80372	1	1	-5.12548e-15	-3.2253	1	1
ENSG00000233008	LINC01725	ENST00000419733.1,ENST00000457273.5,ENST00000417975.1,ENST00000417565.5,ENST00000413975.5	lincRNA	6.68149e-10	2.85381e-09	7.11637	-0.823461	3.19544e-06	1.55827e-05	4.82897	-2.31981	0.133798	0.362473
ENSG00000137941	TTLL7	ENST00000610996.1,ENST00000464289.1,ENST00000485638.5,ENST00000477524.5,ENST00000467670.1,ENST00000474957.5,ENST00000488014.5,ENST00000472688.5,ENST00000482783.1,ENST00000474702.1,ENST00000480174.5,ENST00000260505.12,ENST00000472937.1,ENST00000480533.1	nonsense_mediated_decay,processed_transcript,protein_coding	1.55545e-52	3.05928e-51	3.63936	2.87281	6.81577e-18	9.92286e-17	2.92285	2.43045	1.10818e-16	1.95275e-15
ENSG00000233061	TTLL7-IT1	ENST00000455929.1	sense_intronic	1.25195e-09	5.21783e-09	3.53116	-1.31873	0.0037271	0.0110679	2.80923	-1.52691	0.00732804	0.0295634
ENSG00000271576	RP11-486G15.2	ENST00000605506.1	lincRNA	3.25418e-06	9.96592e-06	1.5314	2.2137	0.000180733	0.000681129	0.417009	1.67237	0.399921	0.838629
ENSG00000142875	PRKACB	ENST00000417530.5,ENST00000446538.5,ENST00000413538.5,ENST00000370685.7,ENST00000370689.6,ENST00000610457.1,ENST00000470673.5,ENST00000370680.5,ENST00000370688.7,ENST00000436133.5,ENST00000614872.4,ENST00000370682.7,ENST00000394838.6,ENST00000370684.5,ENST00000610703.4,ENST00000432111.5,ENST00000467507.1,ENST00000394839.6,ENST00000450730.5	processed_transcript,protein_coding	2.72542e-10	1.19799e-09	-1.92029	6.26212	5.70048e-08	3.43597e-07	-1.30106	6.51313	6.22839e-13	8.60572e-12
ENSG00000213540	RP11-486G15.1	ENST00000448052.1	processed_pseudogene	0.295867	0.385259	0.716961	-0.445626	0.43066	0.640387	0.65468	-0.368368	0.225521	0.54519
ENSG00000226970	RP11-82H13.2	ENST00000441775.1	processed_pseudogene	0.0296404	0.0519746	-4.16408	-2.01914	0.170451	0.31734	-2.36204	-2.31777	0.162103	0.415183
ENSG00000203943	SAMD13	ENST00000479082.1,ENST00000370670.2,ENST00000394834.7,ENST00000370669.5,ENST00000463429.1,ENST00000370668.7,ENST00000370671.7,ENST00000454967.1,ENST00000370673.7	retained_intron,protein_coding	0.0493316	0.0807185	-1.76687	0.947702	0.0024762	0.00764113	-0.0615191	1.45375	0.884829	1
ENSG00000249237	RP11-376N17.4	ENST00000510918.5,ENST00000505585.5,ENST00000506295.1	processed_transcript,transcribed_unitary_pseudogene	0.00708432	0.0139988	-3.61285	-2.23508	0.312854	0.479929	1.36118	-1.70254	0.239442	0.572101
ENSG00000240520	UOX	ENST00000638373.1,ENST00000640983.1,ENST00000483236.2,ENST00000471089.5,ENST00000638856.1	processed_transcript,transcribed_unitary_pseudogene	0.00239911	0.00513076	5.11779	-2.05747	0.0490569	0.11019	-5.12548e-15	-3.2253	1	1
ENSG00000117133	RPF1	ENST00000370656.5,ENST00000370654.5	protein_coding	0.0202132	0.0364775	-1.27859	4.65456	0.0115892	0.0307787	0.311076	5.4048	0.13347	0.361951
ENSG00000174021	GNG5	ENST00000370641.3,ENST00000370645.8,ENST00000487806.5	processed_transcript,protein_coding	0.541533	0.641501	0.144919	5.77402	0.590475	0.839301	-0.217591	5.70043	0.380915	0.806862
ENSG00000122432	SPATA1	ENST00000484939.1,ENST00000485121.5,ENST00000460286.1,ENST00000473108.1,ENST00000490879.7,ENST00000468437.1	processed_transcript,protein_coding	1.95794e-16	1.28258e-15	3.51943	1.68063	1.14358e-08	7.45761e-08	-0.793835	-0.79824	0.432369	0.886512
ENSG00000117151	CTBS	ENST00000370630.5,ENST00000370625.1,ENST00000477677.5,ENST00000465118.6	nonsense_mediated_decay,processed_transcript,protein_coding	5.47965e-05	0.000146527	1.28148	5.33788	2.8034e-06	1.37865e-05	0.256544	4.81051	0.219642	0.533476
ENSG00000180869	LINC01555	ENST00000370624.1	lincRNA	0.515738	0.613487	2.96192	-2.62475	1	1	-5.12548e-15	-3.2253	1	1
ENSG00000232622	RP11-484D4.3	ENST00000418010.1	processed_pseudogene	0.408218	0.510712	-2.73312	-2.48948	1	1	-0.886675	-2.7658	1	1
ENSG00000117155	SSX2IP	ENST00000460500.1,ENST00000490476.1,ENST00000476905.6,ENST00000342203.7,ENST00000459708.1,ENST00000481102.5,ENST00000603677.1,ENST00000422026.1,ENST00000605755.5,ENST00000437941.6	nonsense_mediated_decay,retained_intron,protein_coding	5.45815e-07	1.79748e-06	-1.61517	3.56523	0.000459805	0.00161957	0.403582	4.43233	0.0528357	0.166839
ENSG00000171517	LPAR3	ENST00000491034.1,ENST00000370611.3,ENST00000440886.1	processed_transcript,protein_coding	2.71492e-10	1.19354e-09	2.17786	0.73189	2.21217e-05	9.58818e-05	2.30909	1.10622	1.58987e-06	1.19962e-05
ENSG00000153898	MCOLN2	ENST00000284027.5,ENST00000530971.1,ENST00000370608.7,ENST00000463065.5,ENST00000531325.5,ENST00000531874.1	nonsense_mediated_decay,processed_transcript,retained_intron,protein_coding	3.35098e-186	3.73629e-184	11.8677	4.01698	5.46473e-58	6.40555e-56	12.75	4.53293	3.3787e-116	6.1431e-114
ENSG00000162643	WDR63	ENST00000484007.1,ENST00000528899.5,ENST00000370596.5,ENST00000464801.1,ENST00000294664.10,ENST00000326813.12	nonsense_mediated_decay,protein_coding	0.00260289	0.00553585	5.06943	-2.05945	0.102611	0.203504	4.6194	-2.41903	0.0691949	0.209884
ENSG00000055732	MCOLN3	ENST00000370589.6,ENST00000474447.1,ENST00000370587.5,ENST00000475312.1,ENST00000341115.8,ENST00000490600.6	nonsense_mediated_decay,processed_transcript,protein_coding	1.8034e-63	4.27472e-62	9.82208	1.8792	1.09817e-17	1.57303e-16	6.89774	-0.980669	4.11041e-07	3.31987e-06
ENSG00000097096	SYDE2	ENST00000341460.5,ENST00000234668.6	retained_intron,protein_coding	3.85657e-113	1.8256e-111	10.995	3.10453	9.03965e-31	2.77186e-29	11.1124	2.9117	2.84777e-56	1.85598e-54
ENSG00000162642	C1orf52	ENST00000471115.5,ENST00000294661.8,ENST00000493514.1,ENST00000344356.5	processed_transcript,protein_coding	0.00200964	0.0043481	1.24139	5.30423	1.34078e-05	6.00826e-05	0.284524	4.81956	0.134217	0.363302
ENSG00000142867	BCL10	ENST00000370580.5,ENST00000620248.1	protein_coding	0.879721	0.887795	0.0273579	4.69984	0.925087	1	0.325765	4.96187	0.0777336	0.230388
ENSG00000153904	DDAH1	ENST00000633113.1,ENST00000284031.12,ENST00000535924.6,ENST00000483110.5,ENST00000426972.7,ENST00000539042.3	processed_transcript,protein_coding	3.22517e-39	4.71688e-38	-3.98842	5.59503	4.8084e-35	1.86282e-33	-2.00491	5.9136	2.03471e-31	6.86099e-30
ENSG00000273264	RP11-131L23.2	ENST00000610230.1	lincRNA	0.104535	0.159329	1.12098	-2.20879	0.681087	0.942069	-3.18992	-2.90309	0.52202	0.980779
ENSG00000282057	RP4-621F18.2	ENST00000467666.2,ENST00000488557.6,ENST00000467530.5,ENST00000498304.5,ENST00000472448.1	lincRNA	0.000880112	0.00200638	2.56098	-0.40013	0.0274089	0.0661402	-1.16569	-1.8324	0.314049	0.689791
ENSG00000272691	RP11-290M5.4	ENST00000609367.1	lincRNA	0.956723	0.959993	-2.73312	-2.48948	1	1	-0.0398612	-2.64034	1	1
ENSG00000142871	CYR61	ENST00000451137.6,ENST00000480413.1	processed_transcript,protein_coding	3.72386e-200	5.13636e-198	6.0724	6.8691	4.41172e-69	9.04968e-67	-0.562884	1.67766	0.127039	0.346774
ENSG00000117174	ZNHIT6	ENST00000370574.3,ENST00000431532.6	protein_coding	0.0079757	0.015532	-1.18481	5.34274	0.00106358	0.00351342	0.135267	5.98024	0.404837	0.845226
ENSG00000171502	COL24A1	ENST00000473734.1,ENST00000370571.6,ENST00000485434.1,ENST00000496682.2,ENST00000426639.5	nonsense_mediated_decay,processed_transcript,protein_coding	8.17172e-24	7.49914e-23	-1.9877	3.90219	2.72344e-11	2.32959e-10	-2.9318	3.81974	2.42089e-08	2.25003e-07
ENSG00000122417	ODF2L	ENST00000463933.5,ENST00000479890.5,ENST00000478286.2,ENST00000534092.5,ENST00000394733.2,ENST00000473792.2,ENST00000488879.6,ENST00000294678.6,ENST00000476054.5,ENST00000317336.11,ENST00000472144.5,ENST00000486557.1,ENST00000460698.6,ENST00000462648.5,ENST00000524695.5,ENST00000370566.7,ENST00000480440.5,ENST00000472368.1,ENST00000531412.5,ENST00000359242.7,ENST00000496592.5,ENST00000486215.1	nonsense_mediated_decay,processed_transcript,retained_intron,protein_coding	0.346305	0.444372	-0.52067	4.89255	0.14981	0.283045	-0.26447	5.10195	0.235057	0.563517
ENSG00000137975	CLCA2	ENST00000490884.1,ENST00000370565.4,ENST00000498802.1	processed_transcript,protein_coding	0.171992	0.241276	1.92289	-2.33069	0.681087	0.942069	-2.34027	-3.05521	1	1
ENSG00000016490	CLCA1	ENST00000394711.1,ENST00000234701.7	protein_coding	0.174239	0.241276	3.8541	-2.46383	0.312854	0.479929	-5.12548e-15	-3.2253	1	1
ENSG00000016602	CLCA4	ENST00000496322.1,ENST00000370563.3	processed_transcript,protein_coding	0.776051	0.81884	0	-2.80372	1	1	-5.12548e-15	-3.2253	1	1
ENSG00000224466	CDCA4P2	ENST00000441182.1	processed_pseudogene	0.45974	0.559869	2.96192	-2.62475	1	1	-5.12548e-15	-3.2253	1	1
ENSG00000153923	CLCA3P	ENST00000490028.5,ENST00000284054.7,ENST00000466454.1	transcribed_unprocessed_pseudogene,processed_transcript	0.664195	0.726418	0	-2.80372	1	1	-5.12548e-15	-3.2253	1	1
ENSG00000097033	SH3GLB1	ENST00000370558.8,ENST00000602603.1,ENST00000482504.1,ENST00000535010.5,ENST00000616170.4	retained_intron,protein_coding	2.02633e-06	6.33786e-06	-1.23412	6.47571	0.00175943	0.00560271	-0.65664	6.77358	8.63363e-05	0.000509641
ENSG00000230721	RP4-612B15.2	ENST00000447415.1	processed_pseudogene	0.306292	0.397798	3.00207	-2.62279	1	1	2.30487	-3.05545	1	1
ENSG00000183291	SELENOF	ENST00000401030.4,ENST00000469566.5,ENST00000616787.4,ENST00000497861.5,ENST00000611507.4,ENST00000467557.1,ENST00000331835.9,ENST00000370554.5	nonsense_mediated_decay,processed_transcript,protein_coding	0.122254	0.183677	0.425072	7.35064	0.115697	0.226759	-0.236508	7.11635	0.120755	0.331931
ENSG00000153936	HS2ST1	ENST00000370550.9,ENST00000370551.8,ENST00000591456.1	protein_coding	6.24724e-14	3.51789e-13	-2.43698	6.09675	2.92069e-16	3.7732e-15	-0.882647	6.57218	1.10594e-08	1.06181e-07
ENSG00000267561	RP5-1052I5.2	ENST00000370548.3	protein_coding	0.582459	0.680069	-0.612459	-1.64413	0.820128	1	-0.693178	-1.83231	0.723537	1
ENSG00000235251	RP11-384B12.2	ENST00000420734.1	processed_pseudogene	0.795016	0.829111	1.0275	-2.4767	1	1	-0.0351495	-2.90331	1	1
ENSG00000225568	RP11-384B12.3	ENST00000440164.1	processed_pseudogene	0.199296	0.27122	1.302	-0.898218	0.427647	0.636172	-0.0473413	-1.41806	1	1
ENSG00000267272	LINC01140	ENST00000484933.6,ENST00000476432.5,ENST00000590653.5,ENST00000461990.1,ENST00000471417.5,ENST00000469312.6,ENST00000589455.5,ENST00000467438.1,ENST00000587165.1,ENST00000490006.6,ENST00000619924.1	lincRNA	0.228362	0.305744	-1.67641	-0.12514	0.059696	0.130814	-1.38885	-0.200229	0.00638212	0.0261998
ENSG00000284240	RP5-1043L3.1	ENST00000640794.1,ENST00000640362.1,ENST00000640491.1	lincRNA	0.000933254	0.00212103	4.42097	-1.31075	0.00111937	0.00368366	4.04539	-1.32133	0.000458339	0.00240204
ENSG00000143013	LMO4	ENST00000489303.1,ENST00000370542.1,ENST00000495705.5,ENST00000370544.9	processed_transcript,protein_coding	2.58356e-06	7.98472e-06	1.02397	6.21896	0.000356753	0.00128098	1.06861	6.35827	5.93299e-09	5.86517e-08
ENSG00000230053	RP11-76N22.1	ENST00000415219.2	processed_pseudogene	0.779382	0.81884	0	-2.80372	1	1	-5.12548e-15	-3.2253	1	1
ENSG00000065243	PKN2	ENST00000370513.9,ENST00000316005.11,ENST00000449189.1,ENST00000495119.1,ENST00000436111.1,ENST00000370521.7	processed_transcript,protein_coding	0.222149	0.298402	0.0412138	6.49827	0.880116	1	-0.346932	6.42029	0.0537224	0.169121
ENSG00000241975	ELOCP19	ENST00000411919.1	processed_pseudogene	0.000364279	0.000876461	-2.30537	0.704748	0.000260753	0.000960528	-0.766482	0.967888	0.102579	0.289196
ENSG00000137947	GTF2B	ENST00000494819.5,ENST00000471471.1,ENST00000370500.9,ENST00000486078.1,ENST00000448623.5,ENST00000471296.5,ENST00000418217.1	processed_transcript,protein_coding	2.22582e-28	2.38136e-27	2.69358	6.93614	1.22923e-11	1.09053e-10	0.299971	5.30682	0.0819027	0.240184
ENSG00000137944	KYAT3	ENST00000260508.8,ENST00000370491.7,ENST00000370486.1,ENST00000446900.6	processed_transcript,protein_coding	8.75251e-05	0.000228264	-1.51822	4.70413	6.581e-05	0.000266775	0.120558	5.41815	0.51451	0.980779
ENSG00000213516	RBMXL1	ENST00000413769.1,ENST00000321792.5,ENST00000399794.6	protein_coding	0.00127517	0.00284895	-0.593491	4.51199	0.145667	0.275998	0.809238	5.33096	2.32009e-05	0.000149986
ENSG00000117226	GBP3	ENST00000564037.1,ENST00000370481.8,ENST00000568006.1,ENST00000461384.6,ENST00000564665.1,ENST00000493594.6,ENST00000445969.1,ENST00000370482.6,ENST00000489444.6,ENST00000475853.2,ENST00000235878.5	nonsense_mediated_decay,processed_transcript,retained_intron,protein_coding	2.28252e-05	6.37908e-05	-0.85107	3.03712	0.0172878	0.0442636	-0.0343551	3.44924	0.903885	1
ENSG00000117228	GBP1	ENST00000370473.4,ENST00000484970.1,ENST00000469194.1,ENST00000468959.1,ENST00000493139.1,ENST00000479889.1,ENST00000459831.1,ENST00000495131.1	processed_transcript,protein_coding	1.43628e-75	4.15184e-74	-5.70313	3.41003	4.74736e-17	6.52557e-16	-11.6218	3.40714	2.82718e-26	7.9991e-25
ENSG00000234518	PTGES3P1	ENST00000439531.1	processed_pseudogene	0.00343247	0.007172	2.06168	0.854236	9.35896e-05	0.000370057	-0.0917076	-0.201993	1	1
ENSG00000162645	GBP2	ENST00000464839.5,ENST00000493802.5,ENST00000463660.1,ENST00000370466.3	nonsense_mediated_decay,processed_transcript,protein_coding	9.71891e-52	1.87692e-50	3.27336	6.55576	1.02039e-20	1.806e-19	-2.17133	3.55513	1.85768e-10	2.10577e-09
ENSG00000213512	GBP7	ENST00000294671.2	protein_coding	0.61423	0.680069	2.96192	-2.62475	1	1	-5.12548e-15	-3.2253	1	1
ENSG00000162654	GBP4	ENST00000355754.6,ENST00000481397.1,ENST00000471938.1	processed_transcript,protein_coding	8.85288e-187	9.94008e-185	-7.94153	4.63616	4.09777e-52	3.69376e-50	-10.6124	4.69602	4.15279e-100	5.80302e-98
ENSG00000154451	GBP5	ENST00000370459.7,ENST00000471171.1,ENST00000490568.1,ENST00000443807.1,ENST00000481145.1	processed_transcript,retained_intron,protein_coding	4.11867e-141	2.65186e-139	-4.42952	4.28189	9.11178e-34	3.29094e-32	-12.4947	4.27508	8.28637e-104	1.26873e-101
ENSG00000183347	GBP6	ENST00000370456.4	protein_coding	0.012695	0.0237651	2.90585	-2.06816	0.0602467	0.131903	-2.34002	-3.05523	1	1
ENSG00000225492	GBP1P1	ENST00000513638.5,ENST00000394662.2	transcribed_unprocessed_pseudogene,processed_transcript	1.37986e-07	4.80213e-07	-1.99729	-0.51865	0.026332	0.0637386	-3.79202	-0.899967	1.33207e-05	8.91576e-05
ENSG00000197147	LRRC8B	ENST00000639264.1,ENST00000330947.6,ENST00000439853.5,ENST00000449440.5,ENST00000358200.5,ENST00000640258.1	protein_coding	5.14799e-05	0.000138097	-0.0745579	6.63096	0.829735	1	-1.03443	6.34672	5.91704e-11	6.97919e-10
ENSG00000230735	RP11-413E1.4	ENST00000429074.1	sense_intronic	8.52267e-05	0.000222615	2.57459	0.137193	0.000155417	0.000591993	1.99096	5.3365e-05	0.000929845	0.00459466
ENSG00000171488	LRRC8C	ENST00000416805.1,ENST00000479252.1,ENST00000370454.8,ENST00000482063.1	nonsense_mediated_decay,processed_transcript,protein_coding	6.31162e-24	5.80545e-23	1.15278	5.49446	0.00230931	0.00716344	2.63742	6.76941	7.36115e-53	4.41118e-51
ENSG00000226394	RP11-413E1.2	ENST00000440817.2	processed_pseudogene	0.60401	0.680069	3.00207	-2.62279	1	1	-5.12548e-15	-3.2253	1	1
ENSG00000231613	RP5-943J3.1	ENST00000432395.1	sense_intronic	0.152749	0.224023	-1.93121	-2.63801	1	1	1.72735	-2.52514	0.420588	0.867919
ENSG00000272931	RP5-943J3.2	ENST00000609194.1	lincRNA	0.000126032	0.000321562	1.34884	1.77573	0.000587918	0.00202774	-0.159981	1.0791	0.696594	1
ENSG00000171492	LRRC8D	ENST00000394593.7,ENST00000525774.5,ENST00000532201.5,ENST00000527156.1,ENST00000414841.1,ENST00000337338.9,ENST00000441269.2	protein_coding	1.95369e-09	8.00796e-09	-2.01473	6.47449	8.04823e-14	8.6395e-13	-0.164871	7.17345	0.346285	0.746153
ENSG00000272672	RP11-302M6.5	ENST00000608671.1	lincRNA	0.000694626	0.00161166	-3.58008	-0.504832	0.00195193	0.00616725	0.332444	0.165501	0.6212	1
ENSG00000228175	GEMIN8P4	ENST00000380526.2	processed_pseudogene	2.74639e-05	7.61235e-05	2.40286	0.101368	3.3793e-05	0.000142944	0.837836	-0.641345	0.162428	0.415737
ENSG00000162664	ZNF326	ENST00000340281.8,ENST00000394583.7,ENST00000370447.3,ENST00000361911.9	nonsense_mediated_decay,protein_coding	0.375239	0.475457	-0.344084	6.04879	0.225701	0.387262	0.266392	6.4533	0.0951724	0.273288
ENSG00000143032	BARHL2	ENST00000370445.4	protein_coding	6.60914e-06	1.96408e-05	5.81549	-1.72727	0.00526398	0.0151304	-5.12548e-15	-3.2253	1	1
ENSG00000233593	RP4-665J23.1	ENST00000635959.1,ENST00000634619.1,ENST00000635581.1,ENST00000606660.1,ENST00000435649.2,ENST00000637260.1,ENST00000636917.1,ENST00000443802.1,ENST00000455680.5	lincRNA,retained_intron	3.70862e-21	3.05001e-20	3.64191	-1.24648	0.0021478	0.00670337	4.52101	-0.253951	1.61432e-08	1.52294e-07
ENSG00000225446	LINC01763	ENST00000425185.2	lincRNA	3.30256e-07	1.11151e-06	6.28943	-1.44987	0.00128345	0.00417169	-5.12548e-15	-3.2253	1	1
ENSG00000272094	RP4-665J23.4	ENST00000606898.1	lincRNA	0.0349977	0.0598827	0	-2.80372	1	1	4.83254	-2.31968	0.0538378	0.169335
ENSG00000232882	PHKA1P1	ENST00000420457.1	processed_pseudogene	0.870604	0.879176	0.753558	-0.634836	0.377645	0.569037	0.898546	-0.445697	0.0875957	0.254523
ENSG00000122482	ZNF644	ENST00000495966.1,ENST00000479798.1,ENST00000498303.5,ENST00000621077.1,ENST00000467231.5,ENST00000370440.5,ENST00000482467.1,ENST00000474405.1,ENST00000347275.9,ENST00000337393.9,ENST00000361321.5,ENST00000482709.1	processed_transcript,protein_coding	0.9891	0.99006	0.332669	7.22513	0.30261	0.479929	0.126248	7.2196	0.453414	0.922276
ENSG00000232393	RPL5P6	ENST00000425640.1	processed_pseudogene	0.677701	0.737935	-1.93121	-2.63801	1	1	-0.0353991	-2.90329	1	1
ENSG00000162669	HFM1	ENST00000455133.1,ENST00000427444.1,ENST00000370425.7,ENST00000497520.1,ENST00000430465.1,ENST00000488023.1,ENST00000448819.5,ENST00000462405.5,ENST00000481900.5	processed_transcript,retained_intron,protein_coding	0.845941	0.855621	0.0253717	1.21491	1	1	0.0655807	1.30451	0.934783	1
ENSG00000215873	FEN1P1	ENST00000401028.2	processed_pseudogene	0.320193	0.414154	2.96192	-2.62475	1	1	3.67911	-2.76635	0.283029	0.635084
ENSG00000097046	CDC7	ENST00000426137.1,ENST00000234626.10,ENST00000486509.1,ENST00000497611.1,ENST00000428239.5	processed_transcript,protein_coding	1.36544e-19	1.04606e-18	-3.02976	5.67358	5.55205e-23	1.1111e-21	-0.680657	6.29555	6.49279e-05	0.000392536
ENSG00000241318	WDR82P2	ENST00000444540.3	processed_pseudogene	0.327184	0.422293	3.00207	-2.62279	1	1	4.62943	-2.4184	0.156601	0.408127
ENSG00000229067	RP11-91I11.1	ENST00000439897.1	processed_pseudogene	0.633425	0.699337	0	-2.80372	1	1	-5.12548e-15	-3.2253	1	1
ENSG00000203914	HSP90B3P	ENST00000415545.2	processed_pseudogene	0.664773	0.726832	0	-2.80372	1	1	2.30325	-3.05558	1	1
ENSG00000069702	TGFBR3	ENST00000533370.1,ENST00000533089.5,ENST00000470600.1,ENST00000468996.2,ENST00000532540.5,ENST00000417833.2,ENST00000370399.6,ENST00000212355.8,ENST00000529608.1,ENST00000525962.5,ENST00000465892.6	nonsense_mediated_decay,processed_transcript,retained_intron,protein_coding	7.97237e-81	2.48167e-79	6.46846	2.96668	1.29423e-37	5.61944e-36	4.50865	1.29489	2.1928e-17	4.00284e-16
ENSG00000137948	BRDT	ENST00000448194.5,ENST00000355011.7,ENST00000450792.5,ENST00000370389.6,ENST00000484781.1,ENST00000423434.5,ENST00000476711.5,ENST00000399546.6,ENST00000457265.1,ENST00000449584.5,ENST00000394530.7,ENST00000402388.1,ENST00000362005.7,ENST00000548992.5,ENST00000427104.5,ENST00000426141.5,ENST00000484833.5,ENST00000470955.5,ENST00000461218.5,ENST00000552654.1,ENST00000440509.5	processed_transcript,protein_coding	0.00454055	0.00929547	5.06943	-2.05945	0.102611	0.203504	-5.12548e-15	-3.2253	1	1
ENSG00000172031	EPHX4	ENST00000480758.1,ENST00000370383.4	processed_transcript,protein_coding	0.083478	0.129971	-1.36321	0.0276146	0.10196	0.203335	-0.575149	0.16937	0.489635	0.980235
ENSG00000230667	SETSIP	ENST00000596516.2,ENST00000485873.2	protein_coding	0.429503	0.530803	-1.01002	-1.50163	0.473983	0.696906	-0.189143	-1.46998	1	1
ENSG00000284413	BTBD8	ENST00000370382.7,ENST00000342818.4	retained_intron,protein_coding	0.287393	0.375512	-3.9186	-2.12224	0.313635	0.480827	0.205827	-1.97775	1	1
ENSG00000189195	BTBD8	ENST00000636805.1,ENST00000635934.1	nonsense_mediated_decay,protein_coding	0.604558	0.680069	-2.73032	-2.48981	1	1	-0.885281	-2.76565	1	1
ENSG00000224678	GAPDHP46	ENST00000424043.3	processed_pseudogene	0.160252	0.2309	3.9239	-2.4599	0.312854	0.479929	-5.12548e-15	-3.2253	1	1
ENSG00000233401	PRKAR1AP1	ENST00000441422.1	processed_pseudogene	0.277152	0.363702	-4.87126	-1.66995	0.0591364	0.129721	-1.31754	-1.76531	0.434409	0.889897
ENSG00000273487	RP4-621B10.8	ENST00000609675.1	lincRNA	0.382713	0.484045	2.42957	-1.85579	0.12076	0.232847	1.83256	-2.05618	0.131855	0.358089
ENSG00000203910	C1orf146	ENST00000370375.7,ENST00000370373.2	protein_coding	0.805448	0.829111	0	-2.80372	1	1	-5.12548e-15	-3.2253	1	1
ENSG00000174842	GLMN	ENST00000463560.1,ENST00000495852.6,ENST00000370360.7,ENST00000471465.1,ENST00000495106.5,ENST00000487911.1	nonsense_mediated_decay,retained_intron,protein_coding	0.108503	0.164766	0.967446	5.12319	0.00159601	0.00511183	0.479515	4.93427	0.00716576	0.0290001
ENSG00000122484	RPAP2	ENST00000484158.1,ENST00000610020.1,ENST00000477322.1	processed_transcript,retained_intron,protein_coding	2.3612e-07	8.04325e-07	-0.74341	5.058	0.0114791	0.0305067	0.93374	6.01889	8.49604e-08	7.42823e-07
ENSG00000162676	GFI1	ENST00000294702.5,ENST00000427103.5,ENST00000370332.5,ENST00000483490.1	processed_transcript,protein_coding	4.46776e-80	1.37734e-78	1.97099	5.29874	6.92662e-12	6.288e-11	3.64862	6.87866	3.03544e-62	2.24328e-60
ENSG00000067208	EVI5	ENST00000492513.5,ENST00000370331.5,ENST00000474806.1,ENST00000540033.2,ENST00000466778.2,ENST00000491940.5,ENST00000468580.5,ENST00000492613.1	processed_transcript,protein_coding	1.71017e-23	1.54941e-22	3.26661	5.16395	4.92312e-14	5.35485e-13	2.29752	4.448	1.9137e-24	5.0402e-23
ENSG00000223787	RP4-593M8.1	ENST00000413730.2	processed_pseudogene	0.290867	0.379536	3.38298	-1.84898	0.0867705	0.177411	2.68198	-2.13892	0.0593161	0.183945
ENSG00000229992	HMGB3P9	ENST00000441799.1	processed_pseudogene	0.032244	0.056107	3.11763	-1.1891	0.00387236	0.0114522	1.74771	-1.76708	0.0912165	0.263894
ENSG00000225505	RP11-330C7.3	ENST00000440471.1	processed_pseudogene	0.360164	0.458759	0	-2.80372	1	1	-5.12548e-15	-3.2253	1	1
ENSG00000234202	RP11-330C7.4	ENST00000429959.2	processed_pseudogene	0.38863	0.490771	1.72879	-2.08139	0.320618	0.490382	-0.0403223	-2.6403	1	1
ENSG00000223896	CCNJP2	ENST00000457810.2	processed_pseudogene	0.80086	0.829111	0	-2.80372	1	1	-5.12548e-15	-3.2253	1	1
ENSG00000122406	RPL5	ENST00000461952.1,ENST00000497519.1,ENST00000470843.5,ENST00000315741.5,ENST00000370321.7	nonsense_mediated_decay,retained_intron,protein_coding	0.000318334	0.000773418	-0.0151207	9.07445	0.963646	1	0.773618	9.62574	1.1018e-06	8.46924e-06
ENSG00000154511	FAM69A	ENST00000370310.4,ENST00000613047.4,ENST00000616709.4,ENST00000613902.4,ENST00000615519.4	protein_coding	0.549036	0.649458	-0.928961	0.54566	0.272444	0.458556	0.252509	1.01096	0.757069	1
ENSG00000229052	RP11-386I23.1	ENST00000602631.1,ENST00000418249.2	transcribed_processed_pseudogene,processed_transcript	0.0347345	0.0594896	4.45737	-2.31361	0.190109	0.331684	-5.12548e-15	-3.2253	1	1
ENSG00000143033	MTF2	ENST00000474314.6,ENST00000476037.5,ENST00000497976.5,ENST00000540243.5,ENST00000473430.5,ENST00000471953.5,ENST00000370298.8,ENST00000494963.5,ENST00000487263.5,ENST00000489480.1,ENST00000467953.5,ENST00000370303.4,ENST00000545708.5,ENST00000468457.1	processed_transcript,retained_intron,protein_coding	1.59798e-08	6.06085e-08	-1.96355	6.50815	5.28337e-10	3.95388e-09	-0.543195	7.03107	0.000493025	0.00257077
ENSG00000117500	TMED5	ENST00000370282.7,ENST00000370280.1,ENST00000370290.7,ENST00000479918.5,ENST00000483033.1	nonsense_mediated_decay,processed_transcript,protein_coding	0.604817	0.680069	-0.340959	6.1299	0.340332	0.517616	-0.0864367	6.3505	0.633018	1
ENSG00000122483	CCDC18	ENST00000370276.5,ENST00000448243.5,ENST00000401026.7,ENST00000528942.1,ENST00000343253.11,ENST00000455267.1,ENST00000447456.1,ENST00000421014.2,ENST00000481180.5,ENST00000479653.5	nonsense_mediated_decay,processed_transcript,retained_intron,protein_coding	0.0533887	0.0867403	1.09932	5.89375	0.000111462	0.000435451	0.133086	5.42173	0.556086	1
ENSG00000237003	RP4-612C19.1	ENST00000413542.1	processed_pseudogene	0.485619	0.58515	2.96192	-2.62475	1	1	-5.12548e-15	-3.2253	1	1
ENSG00000225297	RP4-612C19.2	ENST00000426104.1	processed_pseudogene	0.410907	0.51302	-2.73312	-2.48948	1	1	-3.18992	-2.90309	0.52202	0.980779
ENSG00000223745	CCDC18-AS1	ENST00000411670.5,ENST00000440778.5,ENST00000449305.5,ENST00000432741.5,ENST00000452347.5,ENST00000421202.5,ENST00000450843.5,ENST00000445076.1,ENST00000457387.1,ENST00000436200.2,ENST00000438777.5	lincRNA	1.01642e-08	3.9358e-08	2.1872	4.39326	5.24834e-15	6.12944e-14	0.966481	3.62215	0.00159973	0.00752923
ENSG00000229567	RP4-717I23.2	ENST00000423010.1	processed_pseudogene	0.0144783	0.0268505	3.88882	-2.46187	0.312854	0.479929	5.18745	-2.13912	0.0065803	0.0269236
ENSG00000117505	DR1	ENST00000481583.1,ENST00000370272.8,ENST00000370267.1	processed_transcript,protein_coding	0.000662451	0.00154238	-1.19654	6.96021	0.000144024	0.000552014	0.136139	7.60978	0.36618	0.780715
ENSG00000137942	FNBP1L	ENST00000603526.1,ENST00000370253.6,ENST00000424449.2,ENST00000604705.5,ENST00000260506.12,ENST00000271234.11	retained_intron,protein_coding	0.00341359	0.00713581	-0.39405	3.24165	0.416446	0.621271	0.180844	3.60059	0.573072	1
ENSG00000137936	BCAR3	ENST00000538653.1,ENST00000469315.1,ENST00000466632.1,ENST00000539242.5,ENST00000370243.1,ENST00000479503.2,ENST00000370247.7,ENST00000490377.1,ENST00000260502.10,ENST00000370244.5	processed_transcript,retained_intron,protein_coding	3.18304e-06	9.75739e-06	2.46901	0.705216	5.06963e-06	2.41339e-05	0.644358	-0.249262	0.205056	0.504132
ENSG00000230439	RP11-488P3.1	ENST00000433544.1	sense_intronic	0.0622515	0.0997221	0.268945	-2.34114	1	1	2.15201	-1.90397	0.222511	0.539136
ENSG00000260464	RP4-561L24.3	ENST00000565336.1	lincRNA	1.59592e-06	5.04042e-06	2.98178	0.082869	5.0447e-06	2.40188e-05	-1.00889	-1.70109	0.334509	0.725812
ENSG00000067334	DNTTIP2	ENST00000496535.6,ENST00000462746.6,ENST00000436063.6,ENST00000496672.1,ENST00000359208.6,ENST00000528680.1,ENST00000460191.1	nonsense_mediated_decay,processed_transcript,retained_intron,protein_coding	0.185644	0.254819	0.2634	5.55469	0.55052	0.788711	0.693827	5.9103	0.000356637	0.00190238
ENSG00000023909	GCLM	ENST00000370238.7,ENST00000462183.1,ENST00000467772.1,ENST00000615724.1	processed_transcript,protein_coding	6.51338e-17	4.38611e-16	2.0162	5.90888	1.26333e-13	1.32894e-12	0.446276	4.93338	0.257731	0.607722
ENSG00000232752	MTCO3P21	ENST00000430791.1	unprocessed_pseudogene	0.174239	0.241276	3.8541	-2.46383	0.312854	0.479929	-5.12548e-15	-3.2253	1	1
ENSG00000198691	ABCA4	ENST00000465352.1,ENST00000472033.1,ENST00000484388.1,ENST00000470771.1,ENST00000536513.5,ENST00000460514.1,ENST00000370225.3	processed_transcript,protein_coding	5.14423e-06	1.5454e-05	6.10582	-1.54364	0.00242292	0.00748608	-5.12548e-15	-3.2253	1	1
ENSG00000137962	ARHGAP29	ENST00000370217.3,ENST00000546444.1,ENST00000482481.1,ENST00000260526.10,ENST00000552844.5	nonsense_mediated_decay,processed_transcript,retained_intron,protein_coding	0.000110164	0.000283425	3.26204	-1.47894	0.0149523	0.0388326	0.876101	-2.41819	0.714382	1
ENSG00000236098	RP11-148B18.4	ENST00000414039.1	lincRNA	0.60401	0.680069	3.00207	-2.62279	1	1	-5.12548e-15	-3.2253	1	1
ENSG00000117528	ABCD3	ENST00000464165.1,ENST00000370214.8,ENST00000468860.1,ENST00000484213.1,ENST00000493416.5,ENST00000315713.5	processed_transcript,protein_coding	1.46562e-10	6.57596e-10	-1.82719	6.26556	9.33683e-12	8.36446e-11	-0.867535	6.63609	3.36342e-08	3.07865e-07
ENSG00000117525	F3	ENST00000478217.5,ENST00000480356.1,ENST00000334047.11,ENST00000370207.4	processed_transcript,protein_coding	0	0	15.224	7.41539	4.10679e-113	1.1947e-109	9.26494	1.12076	9.54219e-25	2.54883e-23
ENSG00000224081	SLC44A3-AS1	ENST00000414374.1,ENST00000635408.1,ENST00000634870.1,ENST00000432162.5,ENST00000418366.2,ENST00000424711.1,ENST00000422162.5,ENST00000424505.2,ENST00000435559.1,ENST00000456551.1,ENST00000421997.5,ENST00000634861.1,ENST00000634339.1,ENST00000635184.1,ENST00000442418.5,ENST00000634937.1,ENST00000635440.1,ENST00000532087.1,ENST00000452922.5	transcribed_processed_pseudogene,processed_transcript,retained_intron	2.06062e-05	5.78572e-05	2.42284	-0.902372	0.00719379	0.0200821	-1.51472	-2.22459	0.335948	0.727949
ENSG00000232857	KATNBL1P2	ENST00000433311.2	processed_pseudogene	0.61423	0.680069	2.96192	-2.62475	1	1	-5.12548e-15	-3.2253	1	1
ENSG00000143036	SLC44A3	ENST00000422520.6,ENST00000532670.1,ENST00000532427.5,ENST00000529450.5,ENST00000446120.6,ENST00000467909.5,ENST00000530397.1,ENST00000271227.10,ENST00000475883.5,ENST00000527077.5	nonsense_mediated_decay,processed_transcript,protein_coding	6.43278e-06	1.91505e-05	3.15391	-0.655867	0.000279426	0.00102319	-0.736262	-2.22519	0.769048	1
ENSG00000117519	CNN3	ENST00000487539.1,ENST00000370206.8,ENST00000545882.5,ENST00000474409.1,ENST00000394202.8,ENST00000415017.1,ENST00000461018.5	processed_transcript,protein_coding	9.2198e-07	2.98044e-06	-1.19921	-0.277673	0.157184	0.295702	-1.52928	-0.467953	0.0248435	0.0868749
ENSG00000172339	ALG14	ENST00000495856.1,ENST00000507727.2,ENST00000370205.5	processed_transcript,protein_coding	0.819857	0.835816	-0.0714692	2.00554	0.909317	1	0.451574	2.36666	0.432285	0.886434
ENSG00000152078	TMEM56	ENST00000455656.1,ENST00000456991.5,ENST00000370203.8,ENST00000463375.1	processed_transcript,protein_coding	2.93205e-25	2.82863e-24	5.53616	-0.503803	1.77999e-06	8.97429e-06	4.99903	-0.587244	0.000209225	0.00116035
ENSG00000271092	TMEM56-RWDD3	ENST00000604534.5,ENST00000604203.1	protein_coding	0.395433	0.497556	-1.23112	-0.720246	0.183204	0.331684	-0.17937	-0.525302	0.939737	1
ENSG00000231992	RP11-57H12.2	ENST00000434207.1	sense_intronic	0.307394	0.399088	2.96192	-2.62475	1	1	2.30325	-3.05558	1	1
ENSG00000122481	RWDD3	ENST00000473397.1,ENST00000263893.10,ENST00000495272.5,ENST00000460571.1,ENST00000370202.4,ENST00000497058.5,ENST00000492639.5	processed_transcript,protein_coding	0.593292	0.680069	0.0245558	2.08178	1	1	-0.386948	1.98607	0.212423	0.518381
ENSG00000228504	LINC01760	ENST00000423410.1	lincRNA	0.776051	0.81884	0	-2.80372	1	1	-5.12548e-15	-3.2253	1	1
ENSG00000237954	RP11-14O19.2	ENST00000426881.6,ENST00000427695.3	lincRNA	0.61423	0.680069	2.96192	-2.62475	1	1	-5.12548e-15	-3.2253	1	1
ENSG00000233907	LINC01761	ENST00000424943.1	lincRNA	0.60401	0.680069	3.00207	-2.62279	1	1	-5.12548e-15	-3.2253	1	1
ENSG00000228971	RP11-286B14.1	ENST00000411798.1,ENST00000456933.1,ENST00000440116.2	lincRNA	0.160252	0.2309	3.9239	-2.4599	0.312854	0.479929	-5.12548e-15	-3.2253	1	1
ENSG00000231987	LINC01787	ENST00000435311.1	lincRNA	0.80086	0.829111	0	-2.80372	1	1	-5.12548e-15	-3.2253	1	1
ENSG00000234422	UBE2WP1	ENST00000362030.3	processed_pseudogene	0.61423	0.680069	2.96192	-2.62475	1	1	-5.12548e-15	-3.2253	1	1
ENSG00000228502	EEF1A1P11	ENST00000415278.1	processed_pseudogene	0.173441	0.241276	1.11716	1.95642	0.00451216	0.0132019	0.406062	1.68001	0.229407	0.552663
ENSG00000137970	RPL7P9	ENST00000468715.1	processed_pseudogene	0.00266424	0.00565807	-1.45792	2.16748	0.0132846	0.0348477	-0.950894	2.33448	0.00378022	0.016389
ENSG00000117569	PTBP2	ENST00000459735.5,ENST00000426398.2,ENST00000462433.1,ENST00000370198.5,ENST00000476783.5,ENST00000609116.5,ENST00000476419.5,ENST00000482253.5,ENST00000460706.5,ENST00000492905.5,ENST00000370197.5	processed_transcript,protein_coding	0.242327	0.322498	0.869337	5.76631	0.0238634	0.0586369	0.28191	5.52619	0.0918433	0.265371
ENSG00000188641	DPYD	ENST00000370192.7,ENST00000306031.5,ENST00000474241.1,ENST00000460019.1	processed_transcript,retained_intron,protein_coding	1.33469e-05	3.83361e-05	0.0960905	5.95361	0.728699	0.998689	-1.26673	5.51241	1.79855e-13	2.58901e-12
ENSG00000232542	DPYD-IT1	ENST00000424982.1	sense_intronic	0.048121	0.0789678	-1.40426	-1.82167	0.519087	0.755928	-0.259472	-1.83306	1	1
ENSG00000228057	SEC63P1	ENST00000425785.1	processed_pseudogene	0.873813	0.88211	-0.835456	-1.57007	0.61363	0.868466	-0.0403978	-1.52457	1	1
ENSG00000225206	MIR137HG	ENST00000602852.1,ENST00000413670.2,ENST00000602984.1,ENST00000424528.2,ENST00000634594.1	lincRNA	0.0347345	0.0594896	4.45737	-2.31361	0.190109	0.331684	-5.12548e-15	-3.2253	1	1
ENSG00000226053	LINC01776	ENST00000418344.1	lincRNA	0.515738	0.613487	2.96192	-2.62475	1	1	-5.12548e-15	-3.2253	1	1
ENSG00000162627	SNX7	ENST00000454199.1,ENST00000528824.1,ENST00000306121.7,ENST00000529992.5,ENST00000473868.5	nonsense_mediated_decay,processed_transcript,protein_coding	0.103236	0.15756	4.45737	-2.31361	0.190109	0.331684	-5.12548e-15	-3.2253	1	1
ENSG00000117598	PLPPR5	ENST00000534652.1,ENST00000370188.7,ENST00000263177.4	processed_transcript,protein_coding	0.0968127	0.148647	3.88882	-2.46187	0.312854	0.479929	-5.12548e-15	-3.2253	1	1
ENSG00000227034	RP11-234N17.1	ENST00000457507.1	processed_pseudogene	0.363767	0.462385	0	-2.80372	1	1	-5.12548e-15	-3.2253	1	1
ENSG00000117600	PLPPR4	ENST00000370184.1,ENST00000457765.5,ENST00000370185.7	protein_coding	0.00644747	0.0128724	0	-2.80372	1	1	4.06903	-2.64064	0.158698	0.408127
ENSG00000224445	LINC01708	ENST00000635551.1,ENST00000438829.2,ENST00000634316.1	lincRNA	0.61423	0.680069	2.96192	-2.62475	1	1	-5.12548e-15	-3.2253	1	1
ENSG00000099260	PALMD	ENST00000615664.1,ENST00000263174.8,ENST00000605497.5,ENST00000496843.1,ENST00000605613.1	retained_intron,protein_coding	0.173243	0.241276	3.8541	-2.46383	0.312854	0.479929	-5.12548e-15	-3.2253	1	1
ENSG00000156869	FRRS1	ENST00000370176.2,ENST00000287474.9,ENST00000492943.1,ENST00000489209.2	processed_transcript,retained_intron,protein_coding	3.32426e-08	1.22879e-07	-0.956223	2.71929	0.00368052	0.0109409	0.893351	3.68302	6.45711e-05	0.000390453
ENSG00000162688	AGL	ENST00000361915.7,ENST00000370165.7,ENST00000477753.1,ENST00000370161.6,ENST00000637337.1,ENST00000361302.7,ENST00000294724.8,ENST00000370163.7	nonsense_mediated_decay,processed_transcript,retained_intron,protein_coding	1.6681e-16	1.09856e-15	-3.17712	5.14579	1.15613e-24	2.56739e-23	-0.813943	5.72592	2.64095e-06	1.94009e-05
ENSG00000117620	SLC35A3	ENST00000422078.1,ENST00000638988.1,ENST00000640726.1,ENST00000639807.1,ENST00000639088.1,ENST00000638371.1,ENST00000640715.1,ENST00000427993.7,ENST00000640732.1,ENST00000638876.1,ENST00000640360.1,ENST00000639221.1,ENST00000640600.1,ENST00000370153.6,ENST00000532693.5,ENST00000533028.7,ENST00000639994.1,ENST00000370155.9,ENST00000638929.1,ENST00000638336.1,ENST00000465289.6,ENST00000640178.1,ENS…	nonsense_mediated_decay,processed_transcript,retained_intron,protein_coding	0.0109873	0.0207663	-1.25308	4.59515	0.00177695	0.00565514	-0.0901006	5.13137	0.646927	1
ENSG00000283761	RP4-714D9.5	ENST00000638968.1,ENST00000638779.1,ENST00000639171.1,ENST00000640357.1,ENST00000638792.1,ENST00000640238.1,ENST00000639037.1,ENST00000639040.1	nonsense_mediated_decay,protein_coding	0.532095	0.631286	-0.483857	1.04477	0.34722	0.527115	-0.0126223	1.28216	1	1
ENSG00000156875	MFSD14A	ENST00000421661.1,ENST00000370152.7	retained_intron,protein_coding	6.41467e-08	2.30744e-07	1.89486	3.41468	6.33449e-08	3.79666e-07	-0.0773868	2.30637	0.806521	1
ENSG00000156876	SASS6	ENST00000462159.1,ENST00000287482.5	processed_transcript,protein_coding	1.14231e-06	3.65502e-06	-2.42357	4.87539	4.66457e-11	3.90647e-10	-0.245752	5.59125	0.148945	0.395737
ENSG00000122435	TRMT13	ENST00000370139.1,ENST00000370141.6,ENST00000482437.5,ENST00000493651.1,ENST00000370143.5	nonsense_mediated_decay,processed_transcript,protein_coding	0.0154353	0.0284949	-1.1113	4.15802	0.0136738	0.0357777	0.570907	5.00332	0.00182517	0.00850398
ENSG00000122477	LRRC39	ENST00000370137.5,ENST00000342895.7,ENST00000370138.1,ENST00000620882.4	protein_coding	0.023229	0.0414457	1.90926	0.307842	0.00130621	0.00423879	0.55788	-0.295506	0.291536	0.648625
ENSG00000137992	DBT	ENST00000370132.8,ENST00000370131.3	protein_coding	0.00424476	0.00874025	-0.700203	5.02261	0.0252423	0.0614121	0.380868	5.62927	0.0523876	0.165603
ENSG00000225169	BRI3P1	ENST00000440440.1	processed_pseudogene	0.696333	0.753834	0	-2.80372	1	1	-5.12548e-15	-3.2253	1	1
ENSG00000137996	RTCA	ENST00000370128.8,ENST00000370126.1,ENST00000498617.5,ENST00000260563.4,ENST00000483474.1	processed_transcript,protein_coding	9.67427e-06	2.82152e-05	-0.646687	4.88487	0.0369561	0.0861698	0.497387	5.53747	0.00504371	0.0211587
ENSG00000215871	RP5-837M10.1	ENST00000401024.2	processed_pseudogene	0.142618	0.210798	3.8541	-2.46383	0.312854	0.479929	-5.12548e-15	-3.2253	1	1
ENSG00000079335	CDC14A	ENST00000370124.7,ENST00000361544.10,ENST00000635056.1,ENST00000455467.5,ENST00000336454.3,ENST00000469387.1	processed_transcript,protein_coding	6.63556e-10	2.83533e-09	1.79592	5.19805	2.84566e-08	1.77715e-07	0.461529	4.40957	0.0213607	0.0763904
ENSG00000234332	BCAS2P2	ENST00000425064.1	processed_pseudogene	0.124978	0.187404	0	-2.80372	1	1	-5.12548e-15	-3.2253	1	1
ENSG00000181656	GPR88	ENST00000315033.4	protein_coding	5.52274e-05	0.000147618	5.63457	-1.82846	0.00967474	0.0260819	-5.12548e-15	-3.2253	1	1
ENSG00000230402	LINC01349	ENST00000416343.2	lincRNA	0.00164786	0.00360681	-0.237626	-2.22004	1	1	-3.72154	-2.76541	0.283029	0.635084
ENSG00000162692	VCAM1	ENST00000294728.6,ENST00000347652.6,ENST00000603679.1,ENST00000370119.8,ENST00000370115.1	retained_intron,protein_coding	0.0770062	0.120924	3.8541	-2.46383	0.312854	0.479929	-5.12548e-15	-3.2253	1	1
ENSG00000162694	EXTL2	ENST00000494907.1,ENST00000416479.1,ENST00000450240.2,ENST00000480774.1,ENST00000370114.7,ENST00000370113.7,ENST00000535414.5	processed_transcript,protein_coding	0.0090906	0.0173962	-0.624953	4.39468	0.0448573	0.101941	-0.0989779	4.71904	0.647589	1
ENSG00000162695	SLC30A7	ENST00000370111.4,ENST00000357650.8,ENST00000370112.8	protein_coding	0.000958523	0.00217398	0.996157	6.22436	0.000916719	0.00306147	0.804096	6.20985	4.4873e-07	3.6106e-06
ENSG00000230946	HNRNPA1P68	ENST00000425806.2	processed_pseudogene	0.45974	0.559869	2.96192	-2.62475	1	1	-5.12548e-15	-3.2253	1	1
ENSG00000117543	DPH5	ENST00000490732.5,ENST00000464270.5,ENST00000466807.5,ENST00000492067.5,ENST00000488176.1,ENST00000498372.5,ENST00000476507.1,ENST00000477293.5,ENST00000481982.1,ENST00000370105.7,ENST00000488789.5,ENST00000481871.5,ENST00000370109.7,ENST00000427040.2,ENST00000342173.11	processed_transcript,protein_coding	9.86876e-05	0.000255626	-1.02395	4.18566	0.0144565	0.037641	0.855876	5.18139	1.53553e-06	1.16026e-05
ENSG00000233184	RP11-421L21.3	ENST00000451213.1	retained_intron	1.23287e-06	3.93534e-06	-1.91356	2.00517	6.8468e-05	0.000276813	-0.831591	2.29065	0.00875152	0.0346552
ENSG00000170989	S1PR1	ENST00000475289.1,ENST00000475821.1,ENST00000305352.6	processed_transcript,protein_coding	1.30979e-05	3.76614e-05	2.52616	-2.19253	0.190109	0.331684	-2.34027	-3.05521	1	1
ENSG00000228399	RP4-575N6.2	ENST00000455561.1	processed_pseudogene	0.715259	0.770846	-1.93442	-2.63768	1	1	-0.0351495	-2.90331	1	1
ENSG00000173810	PPIAP7	ENST00000454070.2	processed_pseudogene	0.806252	0.829111	-1.93121	-2.63801	1	1	-2.34027	-3.05521	1	1
ENSG00000231671	LINC01307	ENST00000454466.1,ENST00000439146.1,ENST00000444327.1	lincRNA	0.450553	0.552424	0	-2.80372	1	1	-5.12548e-15	-3.2253	1	1
ENSG00000183298	RPSAP19	ENST00000431241.1	processed_pseudogene	0.0141512	0.0262835	0.805119	-0.0758075	0.200106	0.347387	0.798532	0.0586614	0.145476	0.388002
ENSG00000118733	OLFM3	ENST00000462354.5,ENST00000338858.9,ENST00000465523.5,ENST00000468901.1,ENST00000536598.1,ENST00000370103.8	processed_transcript,protein_coding	0.399072	0.501009	0	-2.80372	1	1	-5.12548e-15	-3.2253	1	1
ENSG00000230864	RP5-936J12.1	ENST00000414418.1	lincRNA	0.00166785	0.0036401	5.31788	-1.9442	0.0897432	0.182266	-5.12548e-15	-3.2253	1	1
ENSG00000185946	RNPC3	ENST00000531883.5,ENST00000533099.5,ENST00000525323.1,ENST00000524631.5,ENST00000533834.1,ENST00000423855.6,ENST00000524641.1,ENST00000527062.5,ENST00000532117.1	nonsense_mediated_decay,retained_intron,protein_coding	6.3274e-11	2.92048e-10	2.22349	6.17648	5.45106e-07	2.93414e-06	0.59933	5.12004	0.00422644	0.0180328
ENSG00000240038	AMY2B	ENST00000481821.1,ENST00000462971.1,ENST00000477657.5,ENST00000361355.8,ENST00000453959.5,ENST00000491397.1,ENST00000435302.5,ENST00000610648.1	nonsense_mediated_decay,processed_transcript,protein_coding	0.0554535	0.0897577	-0.704966	2.45178	0.0742958	0.158762	0.300457	2.97614	0.453768	0.922938
ENSG00000243480	AMY2A	ENST00000622339.4,ENST00000414303.6,ENST00000423678.1,ENST00000497748.1	processed_transcript,protein_coding	0.160252	0.2309	3.9239	-2.4599	0.312854	0.479929	-5.12548e-15	-3.2253	1	1
ENSG00000174876	AMY1B	ENST00000464691.1,ENST00000425410.1,ENST00000330330.9,ENST00000446703.5,ENST00000370080.7	processed_transcript,protein_coding	0.779382	0.81884	0	-2.80372	1	1	-5.12548e-15	-3.2253	1	1
ENSG00000215869	RP11-364B6.2	ENST00000401022.2,ENST00000634580.1,ENST00000634888.1,ENST00000418362.1,ENST00000634997.1	transcribed_processed_pseudogene,processed_transcript	0.488156	0.587123	2.96192	-2.62475	1	1	-5.12548e-15	-3.2253	1	1
ENSG00000228347	FTLP17	ENST00000432567.1	processed_pseudogene	0.680937	0.740829	1.0275	-2.4767	1	1	-0.0351495	-2.90331	1	1
ENSG00000237897	RP11-90H3.2	ENST00000433990.1	processed_pseudogene	0.7004	0.757445	0	-2.80372	1	1	-5.12548e-15	-3.2253	1	1
ENSG00000232952	RP11-90H3.1	ENST00000415279.1	processed_pseudogene	0.910328	0.916457	0.271748	-2.34146	1	1	1.18255	-2.31862	0.51012	0.980779
ENSG00000233047	LINC01677	ENST00000417385.1,ENST00000635342.1,ENST00000635713.1,ENST00000635636.1,ENST00000429080.1,ENST00000446693.5	lincRNA	0.0391764	0.0655397	4.39582	-2.31757	0.190109	0.331684	-5.12548e-15	-3.2253	1	1
ENSG00000230932	RP5-947P14.2	ENST00000415580.2	processed_pseudogene	0.0326372	0.0563803	4.48841	-2.31164	0.190109	0.331684	-5.12548e-15	-3.2253	1	1
ENSG00000232551	MTCO1P14	ENST00000441695.2	processed_pseudogene	0.0326372	0.0563803	4.48841	-2.31164	0.190109	0.331684	-5.12548e-15	-3.2253	1	1
ENSG00000198890	PRMT6	ENST00000370078.1	protein_coding	0.000358409	0.00086331	-1.15087	4.55269	0.000771574	0.0026086	0.449929	5.34423	0.071284	0.214657
ENSG00000162631	NTNG1	ENST00000370068.5,ENST00000370065.1,ENST00000370067.5,ENST00000370073.6,ENST00000370066.5,ENST00000370076.2,ENST00000462149.1,ENST00000370071.6,ENST00000370074.8,ENST00000477948.1,ENST00000294649.8	processed_transcript,retained_intron,protein_coding	2.06191e-05	5.78883e-05	5.85675	-1.72324	0.0108037	0.0288533	-5.12548e-15	-3.2253	1	1
ENSG00000224550	RP11-270C12.3	ENST00000416095.1	processed_pseudogene	0.0673139	0.107086	-3.23969	-2.35634	0.541902	0.777653	0.349059	-2.31827	1	1
ENSG00000134215	VAV3	ENST00000533398.5,ENST00000527011.5,ENST00000529413.5,ENST00000490388.2,ENST00000524574.5,ENST00000415432.6,ENST00000530671.1,ENST00000525460.5,ENST00000370056.8,ENST00000529809.5,ENST00000343258.8,ENST00000525231.5,ENST00000469325.5,ENST00000479977.6,ENST00000529033.5	nonsense_mediated_decay,processed_transcript,retained_intron,protein_coding	0.000222382	0.000551346	-1.0057	5.16367	0.000135469	0.000520847	-0.0978281	5.62748	0.575022	1
ENSG00000226822	RP11-356N1.2	ENST00000634935.1,ENST00000635340.1,ENST00000419428.2,ENST00000634635.1,ENST00000451023.1	lincRNA	6.83761e-06	2.02915e-05	0.0285447	-1.63502	1	1	-2.57547	-2.22439	0.0920497	0.26564
ENSG00000085491	SLC25A24	ENST00000370041.4,ENST00000264128.13,ENST00000565488.5,ENST00000569674.1	nonsense_mediated_decay,protein_coding	1.09553e-65	2.70502e-64	3.28604	4.20802	1.85764e-24	4.08553e-23	4.0488	5.05781	2.60464e-47	1.38683e-45
ENSG00000196427	NBPF4	ENST00000613157.2,ENST00000415641.7	protein_coding	0.324441	0.419043	-2.72752	-2.49013	1	1	-3.19038	-2.90305	0.52202	0.980779
ENSG00000238122	RP11-483I13.2	ENST00000438965.1	lincRNA	0.281591	0.368861	-1.93121	-2.63801	1	1	-2.34027	-3.05521	1	1
ENSG00000241361	SLC25A24P1	ENST00000411846.6,ENST00000434803.1	transcribed_unprocessed_pseudogene,processed_transcript	0.172585	0.241276	-3.23721	-2.35666	0.541902	0.777653	-3.72176	-2.7654	0.283029	0.635084
ENSG00000243967	NBPF5P	ENST00000357046.4,ENST00000545941.2	transcribed_unprocessed_pseudogene,processed_transcript	0.797688	0.829111	0	-2.80372	1	1	-5.12548e-15	-3.2253	1	1
ENSG00000238118	SLC25A24P2	ENST00000415059.1	unprocessed_pseudogene	0.141061	0.208699	-2.72752	-2.49013	1	1	-3.19038	-2.90305	0.52202	0.980779
ENSG00000186086	NBPF6	ENST00000370040.7,ENST00000495380.6,ENST00000531446.2	protein_coding	1.20756e-06	3.85688e-06	-5.12259	-1.5251	0.0189212	0.0480596	-5.63691	-1.90172	0.00123693	0.0059647
ENSG00000162636	FAM102B	ENST00000370035.7,ENST00000483371.1,ENST00000405454.1	retained_intron,protein_coding	1.45953e-09	6.04437e-09	-1.78422	5.43405	1.10084e-10	8.89342e-10	-0.432673	5.95836	0.0103183	0.0400662
ENSG00000162639	HENMT1	ENST00000370032.9,ENST00000483729.1,ENST00000370031.5,ENST00000493676.1,ENST00000402983.5,ENST00000420055.1	processed_transcript,protein_coding	4.1611e-25	3.99506e-24	-3.19172	5.26591	5.48106e-27	1.38542e-25	-1.02894	5.77464	4.05339e-09	4.06609e-08
ENSG00000134186	PRPF38B	ENST00000370021.1,ENST00000370025.8,ENST00000467302.5,ENST00000485810.1,ENST00000370022.9	processed_transcript,protein_coding	0.386118	0.487965	0.130971	6.39069	0.616373	0.871699	0.527384	6.71685	0.000877011	0.00435782
ENSG00000143107	FNDC7	ENST00000445274.1,ENST00000370017.7	protein_coding	5.39826e-06	1.61806e-05	7.282	-0.664046	1.07698e-05	4.88635e-05	5.01495	-2.22689	0.118953	0.327526
ENSG00000116266	STXBP3	ENST00000495245.1,ENST00000485167.1,ENST00000469338.1,ENST00000472099.1,ENST00000486601.5,ENST00000483586.5,ENST00000370008.3	processed_transcript,retained_intron,protein_coding	0.0305206	0.0533635	-1.03506	5.41603	0.00686268	0.0192232	-0.0153324	5.9305	0.929441	1
ENSG00000228076	RP11-475E11.2	ENST00000444669.2	processed_pseudogene	0.770289	0.817364	0	-2.80372	1	1	-5.12548e-15	-3.2253	1	1
ENSG00000162641	AKNAD1	ENST00000369994.5,ENST00000477908.1,ENST00000474186.5,ENST00000603450.1,ENST00000466413.1,ENST00000472781.2,ENST00000369995.7,ENST00000370001.7,ENST00000461774.5	nonsense_mediated_decay,processed_transcript,retained_intron,protein_coding	2.53252e-07	8.61217e-07	-0.260931	-0.862262	0.885217	1	-6.13091	-1.57916	4.85682e-05	0.000299111
ENSG00000274068	RP11-475E11.9	ENST00000357393.5	protein_coding	0.174239	0.241276	3.8541	-2.46383	0.312854	0.479929	-5.12548e-15	-3.2253	1	1
ENSG00000121957	GPSM2	ENST00000446797.1,ENST00000435475.5,ENST00000264126.7,ENST00000441735.1,ENST00000435987.5,ENST00000406462.6	protein_coding	1.77512e-15	1.0966e-14	-3.12316	4.99183	2.45694e-24	5.37402e-23	-0.920334	5.52482	5.79038e-06	4.07953e-05
ENSG00000121940	CLCC1	ENST00000348264.6,ENST00000356970.6,ENST00000369976.5,ENST00000369970.7,ENST00000369968.6,ENST00000473062.1,ENST00000482889.1,ENST00000369969.6,ENST00000302500.4	processed_transcript,protein_coding	0.0247429	0.0439606	-0.717771	5.38373	0.0362466	0.0852066	0.217347	5.91006	0.175037	0.441838
ENSG00000085433	WDR47	ENST00000530772.5,ENST00000400794.7,ENST00000361054.7,ENST00000529074.1,ENST00000369965.8,ENST00000528747.1,ENST00000531337.1,ENST00000357672.7,ENST00000369962.7	protein_coding	3.84441e-42	6.09318e-41	2.93408	6.20507	3.15532e-25	7.25361e-24	0.411252	4.43448	0.0374632	0.124501
ENSG00000237349	RP5-1065J22.2	ENST00000439282.1	processed_pseudogene	0.0189979	0.0344575	2.21885	-1.20907	0.0380526	0.0884102	0.20508	-1.97769	1	1
ENSG00000244716	RP11-20O24.4	ENST00000414070.1	processed_pseudogene	5.40776e-05	0.000144725	0.915154	1.92064	0.201983	0.350286	1.49552	2.45011	6.78806e-06	4.73345e-05
ENSG00000197780	TAF13	ENST00000338366.5,ENST00000461096.6	nonsense_mediated_decay,protein_coding	0.0821357	0.128068	1.13873	4.32797	0.00376788	0.0111807	0.302074	3.92957	0.305643	0.674476
ENSG00000215717	TMEM167B	ENST00000473828.1,ENST00000479160.1,ENST00000338272.8	processed_transcript,protein_coding	9.12135e-06	2.6695e-05	-1.60759	4.76693	1.2556e-05	5.65109e-05	0.251847	5.57329	0.166426	0.423644
ENSG00000270066	SCARNA2	ENST00000602755.1	lincRNA	8.14975e-77	2.39698e-75	4.49546	10.3903	5.0462e-28	1.34678e-26	0.628324	7.28912	0.000103026	0.000601944
ENSG00000251484	RP5-1065J22.4	ENST00000429752.3	processed_pseudogene	0.80086	0.829111	0	-2.80372	1	1	-5.12548e-15	-3.2253	1	1
ENSG00000179902	C1orf194	ENST00000369942.2,ENST00000369949.8,ENST00000462402.5,ENST00000460065.2,ENST00000369948.7,ENST00000369945.7	nonsense_mediated_decay,retained_intron,protein_coding	0.0397352	0.0663947	4.45737	-2.31361	0.190109	0.331684	-5.12548e-15	-3.2253	1	1
ENSG00000116299	KIAA1324	ENST00000369938.5,ENST00000527996.5,ENST00000529753.5,ENST00000527501.1,ENST00000369939.7,ENST00000490758.6,ENST00000534476.5,ENST00000533374.1,ENST00000464345.1,ENST00000526264.5,ENST00000533147.5,ENST00000457623.6,ENST00000369936.2,ENST00000531664.5	nonsense_mediated_decay,processed_transcript,retained_intron,protein_coding	4.74265e-06	1.43061e-05	5.12861	-0.830872	7.67219e-06	3.55503e-05	2.49493	-2.22631	0.111443	0.310157
ENSG00000031698	SARS	ENST00000468588.1,ENST00000482384.1,ENST00000234677.6,ENST00000471705.1,ENST00000477544.5,ENST00000369923.4	processed_transcript,protein_coding	9.46408e-05	0.000245621	0.605166	6.5666	0.0244456	0.0596598	0.712189	6.73964	0.00144415	0.00685143
ENSG00000143126	CELSR2	ENST00000459940.1,ENST00000489018.1,ENST00000498157.1,ENST00000271332.3	processed_transcript,protein_coding	0.694169	0.752181	0.485236	3.44033	0.123471	0.237628	0.203632	3.39765	0.598382	1
ENSG00000134222	PSRC1	ENST00000429031.5,ENST00000471740.1,ENST00000459765.1,ENST00000418914.2,ENST00000474126.2,ENST00000409138.6,ENST00000369904.7,ENST00000409267.5,ENST00000369909.6,ENST00000369907.7,ENST00000492431.1,ENST00000369903.6	retained_intron,protein_coding	1.42432e-37	1.99817e-36	0.869978	1.71672	0.0249574	0.0607559	3.1377	3.63201	3.69676e-28	1.12023e-26
ENSG00000221986	MYBPHL	ENST00000357155.1,ENST00000489706.5,ENST00000477962.1	processed_transcript,protein_coding	0.172325	0.241276	3.88882	-2.46187	0.312854	0.479929	-5.12548e-15	-3.2253	1	1
ENSG00000134243	SORT1	ENST00000256637.7,ENST00000495777.5,ENST00000538502.5,ENST00000482236.5,ENST00000471996.1,ENST00000483508.5,ENST00000485149.1,ENST00000466471.1,ENST00000493736.5,ENST00000633956.1	nonsense_mediated_decay,processed_transcript,retained_intron,protein_coding	0.00262671	0.0055828	3.44778	-0.186036	6.87009e-05	0.000277615	0.804964	-1.58189	0.387535	0.817854
ENSG00000143106	PSMA5	ENST00000271308.8,ENST00000477897.1,ENST00000538610.5,ENST00000491287.1,ENST00000484563.1,ENST00000490870.5	processed_transcript,protein_coding	0.00023317	0.000576306	0.828892	6.74359	0.00250417	0.00771924	0.605425	6.713	0.00392885	0.0169621
ENSG00000143028	SYPL2	ENST00000475497.1,ENST00000369872.3	processed_transcript,protein_coding	0.000313007	0.000761226	5.87752	-1.63992	0.0577367	0.127533	-5.12548e-15	-3.2253	1	1
ENSG00000162650	ATXN7L2	ENST00000459635.1,ENST00000604728.5,ENST00000497545.5,ENST00000369870.7,ENST00000369869.1,ENST00000463678.5	nonsense_mediated_decay,processed_transcript,retained_intron,protein_coding	2.4258e-05	6.76121e-05	1.48279	4.41048	7.44619e-06	3.46184e-05	0.481484	3.87663	0.04216	0.137497
ENSG00000174151	CYB561D1	ENST00000527072.5,ENST00000430195.2,ENST00000496961.5,ENST00000420578.6,ENST00000533024.5,ENST00000369868.7,ENST00000310611.8,ENST00000393709.3,ENST00000528785.1	protein_coding	0.000983453	0.00222721	-1.49891	4.30781	5.10607e-05	0.000210533	-0.376051	4.77157	0.0687389	0.208933
ENSG00000181754	AMIGO1	ENST00000369864.4,ENST00000369862.1	protein_coding	1.93145e-06	6.05233e-06	-0.130781	0.81986	0.875437	1	1.56385	1.89635	3.83672e-06	2.75775e-05
ENSG00000156097	GPR61	ENST00000618721.4,ENST00000533959.1,ENST00000616874.1,ENST00000527748.5,ENST00000404129.6,ENST00000526744.1,ENST00000469383.2	nonsense_mediated_decay,processed_transcript,protein_coding	0.000234305	0.000578978	5.85675	-1.72324	0.0108037	0.0288533	-5.12548e-15	-3.2253	1	1
ENSG00000065135	GNAI3	ENST00000369851.5	protein_coding	0.244583	0.32523	-0.665038	6.9678	0.0250548	0.0609837	-0.0504051	7.34056	0.758199	1
ENSG00000134183	GNAT2	ENST00000622865.1,ENST00000351050.7	protein_coding	0.0105884	0.0200776	3.72312	-1.73775	0.0158099	0.0408228	1.72757	-2.52516	0.420573	0.867919
ENSG00000116337	AMPD2	ENST00000528454.5,ENST00000256578.7,ENST00000369840.6,ENST00000528667.5,ENST00000486282.6,ENST00000474459.5,ENST00000526301.5,ENST00000532851.1,ENST00000531203.5,ENST00000342115.8,ENST00000467071.1,ENST00000524975.1,ENST00000534144.1,ENST00000527846.5,ENST00000469039.2,ENST00000531734.5,ENST00000528270.5,ENST00000393688.7,ENST00000525415.1,ENST00000476688.2,ENST00000459643.2,ENST00000529299.2,ENS…	nonsense_mediated_decay,processed_transcript,retained_intron,protein_coding	0.0100727	0.0191614	-0.398485	6.663	0.138798	0.264157	-0.63084	6.6729	0.00028258	0.00153186
ENSG00000235045	RPL7P8	ENST00000411964.2	processed_pseudogene	0.060404	0.0970054	-3.23969	-2.35634	0.541902	0.777653	-1.41668	-2.63996	0.656024	1
ENSG00000168765	GSTM4	ENST00000493171.5,ENST00000336075.6,ENST00000369833.5,ENST00000326729.9,ENST00000479578.5,ENST00000369836.8,ENST00000485640.5,ENST00000464733.5,ENST00000461767.5,ENST00000495742.5,ENST00000493395.1,ENST00000478397.5,ENST00000638994.1	processed_transcript,protein_coding	1.03861e-19	7.99507e-19	1.4523	3.22613	0.00045308	0.00159676	1.64939	3.52038	1.41993e-10	1.62393e-09
ENSG00000213366	GSTM2	ENST00000369831.6,ENST00000442650.5,ENST00000481656.2,ENST00000568786.1,ENST00000369829.2,ENST00000369827.7,ENST00000241337.8,ENST00000472225.6,ENST00000476040.6,ENST00000464206.5,ENST00000496578.3,ENST00000467579.7,ENST00000414179.6,ENST00000460717.7	processed_transcript,retained_intron,protein_coding	6.07103e-08	2.19097e-07	2.41326	-1.85777	0.115901	0.227009	4.43867	-0.323575	1.52121e-09	1.59514e-08
ENSG00000134201	GSTM5	ENST00000492718.1,ENST00000369812.6,ENST00000429410.2,ENST00000369813.5,ENST00000256593.7,ENST00000483153.1	processed_transcript,protein_coding	4.08506e-07	1.36311e-06	6.43919	-1.36427	0.00212147	0.00662701	-5.12548e-15	-3.2253	1	1
ENSG00000134202	GSTM3	ENST00000361066.6,ENST00000486823.5,ENST00000488824.1,ENST00000256594.7,ENST00000540225.2,ENST00000476321.5	processed_transcript,protein_coding	7.16711e-167	6.21538e-165	8.65036	5.95775	1.56859e-70	3.51014e-68	4.8401	2.33647	1.07351e-23	2.72206e-22
ENSG00000198758	EPS8L3	ENST00000489465.1,ENST00000482453.1,ENST00000472325.5,ENST00000361965.8,ENST00000475725.1,ENST00000477568.1,ENST00000498743.1,ENST00000369805.7,ENST00000494151.1,ENST00000361852.8	nonsense_mediated_decay,processed_transcript,protein_coding	0.00191912	0.00416183	2.087	-1.67735	0.320155	0.489861	-3.72154	-2.76541	0.283029	0.635084
ENSG00000228420	LINC01768	ENST00000453347.1	lincRNA	9.7827e-35	1.2741e-33	-7.60985	0.294404	9.53501e-08	5.6006e-07	-8.13649	0.0486609	3.22146e-14	4.88332e-13
ENSG00000261055	RP11-195M16.3	ENST00000565955.1	lincRNA	2.75058e-07	9.32596e-07	7.17479	-0.811162	0.000100398	0.000394782	2.30487	-3.05545	1	1
ENSG00000184371	CSF1	ENST00000488198.5,ENST00000527192.5,ENST00000525659.5,ENST00000369802.7,ENST00000357302.8,ENST00000329608.10,ENST00000369801.1,ENST00000526001.1,ENST00000420111.6	processed_transcript,protein_coding	1.75231e-63	4.15671e-62	6.52571	6.78512	7.69033e-78	2.6749e-75	-2.20227	0.722725	0.112392	0.312108
ENSG00000168710	AHCYL1	ENST00000369799.9,ENST00000359172.3,ENST00000393614.8,ENST00000481423.1,ENST00000475081.1,ENST00000469401.1	processed_transcript,protein_coding	0.000171106	0.00042951	0.0131162	7.72791	0.960685	1	-0.921792	7.43862	6.18311e-08	5.49915e-07
ENSG00000143093	STRIP1	ENST00000369795.7,ENST00000461054.1,ENST00000369796.5,ENST00000473429.5,ENST00000539541.1,ENST00000535003.5,ENST00000485775.5,ENST00000489059.1,ENST00000540970.1	nonsense_mediated_decay,retained_intron,protein_coding	0.543203	0.643367	0.0243904	6.24879	0.93043	1	-0.309104	6.19624	0.0475151	0.152017
ENSG00000156150	ALX3	ENST00000369792.4	protein_coding	0.00876167	0.0168201	4.81342	-2.18143	0.0791691	0.163057	-5.12548e-15	-3.2253	1	1
ENSG00000186150	UBL4B	ENST00000334179.4	protein_coding	2.47768e-06	7.67159e-06	3.00207	-2.62279	1	1	-5.12548e-15	-3.2253	1	1
ENSG00000197106	SLC6A17	ENST00000465159.1,ENST00000331565.4	processed_transcript,protein_coding	7.08244e-09	2.77709e-08	6.59374	-1.22028	0.000181352	0.000682816	-5.12548e-15	-3.2253	1	1
ENSG00000116396	KCNC4	ENST00000636402.1,ENST00000369787.7,ENST00000459877.1,ENST00000413138.7,ENST00000469655.5,ENST00000438661.2,ENST00000412512.2,ENST00000489935.1	nonsense_mediated_decay,processed_transcript,retained_intron,protein_coding	7.49385e-05	0.000197158	-1.28149	4.1093	0.000158474	0.00060328	0.386868	4.89494	0.13659	0.368473
ENSG00000282852	RP5-1003J2.4	ENST00000634283.1	processed_pseudogene	0.131091	0.195412	-2.73312	-2.48948	1	1	0.489219	-2.52507	1	1
ENSG00000162775	RBM15	ENST00000369784.7,ENST00000617047.1,ENST00000602849.1,ENST00000618772.4,ENST00000487146.6	protein_coding	0.107075	0.162835	0.661932	7.08968	0.0103954	0.0278814	0.317413	6.99645	0.0357878	0.119604
ENSG00000224699	LAMTOR5-AS1	ENST00000626643.2	retained_intron	0.0030835	0.00648773	-1.58651	-1.73793	0.512743	0.747814	0.744771	-1.31902	0.333006	0.723092
ENSG00000168679	SLC16A4	ENST00000437429.6,ENST00000541986.5,ENST00000528649.5,ENST00000467986.2,ENST00000461647.6,ENST00000472422.6,ENST00000369781.8,ENST00000492412.2,ENST00000497687.1,ENST00000369779.8	nonsense_mediated_decay,processed_transcript,protein_coding	1.5228e-06	4.81709e-06	2.60988	0.168857	0.000611423	0.00210224	-0.729394	-1.36691	0.567474	1
ENSG00000134248	LAMTOR5	ENST00000602858.5,ENST00000602318.5,ENST00000464240.1,ENST00000614544.1,ENST00000256644.8,ENST00000483260.5,ENST00000531779.1,ENST00000474861.6	retained_intron,protein_coding	0.756765	0.811816	0.354251	5.69149	0.222071	0.381626	0.00490075	5.6136	0.982825	1
ENSG00000143125	PROK1	ENST00000271331.3	protein_coding	0.131682	0.196193	3.8541	-2.46383	0.312854	0.479929	-5.12548e-15	-3.2253	1	1
ENSG00000283999	RP11-470L19.7	ENST00000640695.1	processed_transcript	0.776051	0.81884	0	-2.80372	1	1	-5.12548e-15	-3.2253	1	1
ENSG00000240194	CYMP	ENST00000462836.2,ENST00000420853.1,ENST00000474680.5	processed_transcript,transcribed_unitary_pseudogene	4.06868e-07	1.35807e-06	6.23579	-1.45798	0.0019604	0.00618667	-5.12548e-15	-3.2253	1	1
ENSG00000235407	CYMP-AS1	ENST00000457402.1	lincRNA	7.81927e-09	3.05291e-08	3.02253	-1.25662	0.00216273	0.00674601	-3.72154	-2.76541	0.283029	0.635084
ENSG00000143105	KCNA10	ENST00000369771.4	protein_coding	0.000558052	0.00131316	5.73208	-1.82242	0.0734927	0.157225	-5.12548e-15	-3.2253	1	1
ENSG00000177301	KCNA2	ENST00000638532.1,ENST00000639233.1,ENST00000633222.1,ENST00000525120.2,ENST00000640680.1,ENST00000369770.7,ENST00000640774.1,ENST00000639048.1,ENST00000638616.1,ENST00000485317.6,ENST00000638477.1,ENST00000640450.1,ENST00000316361.9,ENST00000640956.1,ENST00000639227.1	processed_transcript,protein_coding	2.60683e-16	1.69446e-15	7.42221	-0.555892	5.35045e-07	2.88288e-06	-5.12548e-15	-3.2253	1	1
ENSG00000259834	RP11-284N8.3	ENST00000566942.1	lincRNA	1.25477e-08	4.81217e-08	-7.88877	0.528178	8.73249e-07	4.58925e-06	0.258899	1.3875	0.692639	1
ENSG00000177272	KCNA3	ENST00000369769.3	protein_coding	0.005165	0.0104986	-0.929068	1.66777	0.0550481	0.122228	-0.185822	1.98502	0.62404	1
ENSG00000237415	NRBF2P3	ENST00000432731.2	processed_pseudogene	0.835609	0.845571	-3.24218	-2.35603	0.541902	0.777653	-1.41809	-2.64011	0.656024	1
ENSG00000143119	CD53	ENST00000471220.5,ENST00000464329.1,ENST00000497404.1,ENST00000476408.1,ENST00000271324.5	processed_transcript,protein_coding	1.26383e-11	6.11005e-11	-1.0995	5.58276	0.000413885	0.00147094	0.637918	6.4827	0.00245555	0.0110766
ENSG00000121931	LRIF1	ENST00000369763.4,ENST00000494675.5,ENST00000485275.2	protein_coding	0.904887	0.911323	0.380933	5.89776	0.295083	0.479929	0.329721	5.97633	0.104457	0.293574
ENSG00000225672	CCNT2P1	ENST00000423082.1	processed_pseudogene	0.436032	0.537462	2.96192	-2.62475	1	1	-5.12548e-15	-3.2253	1	1
ENSG00000156171	DRAM2	ENST00000463682.1,ENST00000490780.5,ENST00000461449.5,ENST00000496430.6,ENST00000539140.5,ENST00000484310.5,ENST00000462092.5,ENST00000286692.8,ENST00000477769.1,ENST00000480600.6,ENST00000477588.5	nonsense_mediated_decay,processed_transcript,protein_coding	2.97025e-05	8.20157e-05	-1.48426	4.64787	4.34368e-06	2.08611e-05	0.299476	5.44839	0.195977	0.485017
ENSG00000134255	CEPT1	ENST00000615636.4,ENST00000357172.8,ENST00000478042.5,ENST00000467362.1,ENST00000473474.5,ENST00000480324.5,ENST00000483427.1,ENST00000498239.5,ENST00000545121.5,ENST00000476865.5,ENST00000460443.5	processed_transcript,protein_coding	3.11323e-05	8.56974e-05	-1.39342	5.29481	1.18788e-06	6.11817e-06	0.201082	6.02607	0.236269	0.565867
ENSG00000162777	DENND2D	ENST00000369752.5,ENST00000473682.5,ENST00000488786.1,ENST00000463713.5,ENST00000473822.5,ENST00000468692.1,ENST00000477586.5,ENST00000357640.8	processed_transcript,protein_coding	1.40603e-18	1.02303e-17	-2.58666	2.30818	9.1528e-08	5.38697e-07	-0.250689	2.9452	0.475771	0.958611
ENSG00000064886	CHI3L2	ENST00000526684.1,ENST00000466741.5,ENST00000524472.5,ENST00000497587.6,ENST00000530597.1,ENST00000529459.1,ENST00000467038.6,ENST00000445067.6,ENST00000528451.5,ENST00000474304.6,ENST00000369748.8,ENST00000369744.6,ENST00000533831.6,ENST00000497220.5,ENST00000477185.6,ENST00000486561.6,ENST00000472825.2	processed_transcript,retained_intron,protein_coding	0.000758082	0.00175051	-0.948042	-2.00695	1	1	-0.733804	-2.22494	0.745017	1
ENSG00000236040	CHIAP1	ENST00000456220.1	unprocessed_pseudogene	0.61423	0.680069	2.96192	-2.62475	1	1	-5.12548e-15	-3.2253	1	1
ENSG00000203878	CHIAP2	ENST00000456752.6,ENST00000449687.1,ENST00000369743.8,ENST00000532686.5	transcribed_unprocessed_pseudogene,processed_transcript	0.00669673	0.0132946	4.86874	-2.17746	0.0791691	0.163057	-5.12548e-15	-3.2253	1	1
ENSG00000134216	CHIA	ENST00000489524.5,ENST00000483391.5,ENST00000430615.1,ENST00000353665.10,ENST00000369740.5,ENST00000343320.10,ENST00000451398.6,ENST00000422815.5,ENST00000477918.6,ENST00000352594.10	nonsense_mediated_decay,retained_intron,protein_coding	0.000803031	0.00183984	5.16217	-2.05348	0.0391901	0.0901052	-5.12548e-15	-3.2253	1	1
ENSG00000173947	PIFO	ENST00000484512.1,ENST00000468395.1,ENST00000369737.4,ENST00000369738.8	processed_transcript,protein_coding	1.18991e-05	3.43347e-05	5.98979	-1.62985	0.00257853	0.00791567	4.06382	-2.64115	0.158698	0.408127
ENSG00000234020	CHIAP3	ENST00000423668.1	unprocessed_pseudogene	0.60401	0.680069	3.00207	-2.62279	1	1	-5.12548e-15	-3.2253	1	1
ENSG00000227179	PGCP1	ENST00000411951.1,ENST00000436252.5	transcribed_unprocessed_pseudogene,processed_transcript	0.0384006	0.0649894	4.4265	-2.31559	0.190109	0.331684	-5.12548e-15	-3.2253	1	1
ENSG00000085465	OVGP1	ENST00000481495.1,ENST00000494622.1,ENST00000369732.3	processed_transcript,protein_coding	0.000682409	0.00158504	1.44223	1.90938	0.00016955	0.000642236	0.148514	1.29668	0.788633	1
ENSG00000116455	WDR77	ENST00000235090.9,ENST00000449340.1,ENST00000459665.1,ENST00000497278.5	processed_transcript,protein_coding	0.00169012	0.00368619	-0.643841	5.51114	0.0175306	0.0448318	0.399739	6.11088	0.183994	0.460669
ENSG00000116459	ATP5F1	ENST00000468818.1,ENST00000483994.1,ENST00000369722.7,ENST00000493119.5,ENST00000464154.1,ENST00000369721.8	processed_transcript,protein_coding	7.75025e-06	2.28684e-05	-1.59395	6.86178	2.43189e-07	1.36312e-06	0.293168	7.70395	0.20499	0.504009
ENSG00000143110	C1orf162	ENST00000369718.3,ENST00000464591.1,ENST00000343534.9	processed_transcript,protein_coding	4.57394e-16	2.92791e-15	-2.50215	2.89863	1.05112e-10	8.50681e-10	-0.961274	3.28038	0.000195333	0.00108896
ENSG00000121933	TMIGD3	ENST00000369717.8,ENST00000369716.8,ENST00000463993.1,ENST00000442484.2,ENST00000472933.2,ENST00000443498.5	processed_transcript,protein_coding	1.34149e-13	7.38856e-13	-3.91476	-2.12286	0.290229	0.479929	0.206119	-1.97771	1	1
ENSG00000282608	ADORA3	ENST00000241356.4,ENST00000495493.1,ENST00000632535.1,ENST00000486342.1	processed_transcript,protein_coding	4.11341e-28	4.36436e-27	-4.71857	-1.7503	0.0611452	0.133669	0.241751	-1.41773	0.883684	1
ENSG00000116473	RAP1A	ENST00000494982.1,ENST00000369709.3,ENST00000356415.5,ENST00000433097.5	processed_transcript,protein_coding	0.0015884	0.00348215	-0.988325	5.4429	0.00501783	0.0145089	0.358124	6.14017	0.0273908	0.0949215
ENSG00000231346	LINC01160	ENST00000453988.1,ENST00000441004.5,ENST00000450155.5	lincRNA	1.54923e-12	7.98959e-12	2.93449	-0.778126	0.00163362	0.00522132	-1.26397	-2.31796	0.481251	0.966794
ENSG00000215867	KRT18P57	ENST00000443599.2	processed_pseudogene	0.479503	0.579219	3.00207	-2.62279	1	1	-5.12548e-15	-3.2253	1	1
ENSG00000197852	FAM212B	ENST00000534365.1,ENST00000527570.1,ENST00000527660.1,ENST00000527621.1,ENST00000357260.5,ENST00000412270.1,ENST00000444059.2	processed_transcript,protein_coding	3.68759e-06	1.12298e-05	0.0158827	2.66903	0.978224	1	-0.781772	2.42246	0.0147229	0.0548595
ENSG00000064703	DDX20	ENST00000475700.1,ENST00000534200.1,ENST00000369702.4,ENST00000524894.1,ENST00000533164.5	nonsense_mediated_decay,retained_intron,protein_coding	4.52276e-11	2.11159e-10	-2.27228	5.26105	9.0133e-15	1.03601e-13	-0.208664	5.97597	0.183583	0.459892
ENSG00000171385	KCND3	ENST00000315987.6,ENST00000302127.4,ENST00000369697.5	protein_coding	3.44952e-11	1.62378e-10	6.72686	-1.14088	0.000132167	0.000509204	-5.12548e-15	-3.2253	1	1
ENSG00000231437	LINC01750	ENST00000428461.1,ENST00000438293.1,ENST00000442751.1	lincRNA	1.27654e-07	4.45465e-07	6.35437	-1.37647	0.00123536	0.00403137	-5.12548e-15	-3.2253	1	1
ENSG00000143079	CTTNBP2NL	ENST00000441739.1,ENST00000502356.3,ENST00000271277.10,ENST00000607039.1	processed_transcript,protein_coding	6.27111e-15	3.76219e-14	1.33762	3.01404	4.68462e-05	0.000193955	1.65801	3.39365	8.42458e-10	9.06173e-09
ENSG00000134245	WNT2B	ENST00000256640.9,ENST00000478360.1,ENST00000369686.9,ENST00000369684.4	processed_transcript,protein_coding	4.67996e-11	2.18275e-10	5.42544	-0.568925	9.77374e-07	5.09463e-06	4.40456	-1.05893	2.42091e-05	0.000155967
ENSG00000007341	ST7L	ENST00000467335.5,ENST00000418497.5,ENST00000360743.8,ENST00000459630.5,ENST00000369664.1,ENST00000490715.5,ENST00000492274.1,ENST00000470683.1,ENST00000343210.11,ENST00000497457.5,ENST00000479436.5,ENST00000361846.7,ENST00000477332.5,ENST00000358039.8,ENST00000485753.5,ENST00000490067.5,ENST00000463235.5,ENST00000497235.5,ENST00000498383.5,ENST00000470519.5,ENST00000480988.5,ENST00000369669.5,EN…	nonsense_mediated_decay,processed_transcript,protein_coding	0.0450258	0.0742846	0.846695	4.41652	0.012839	0.0337563	0.785004	4.4933	0.000137185	0.000784615
ENSG00000116489	CAPZA1	ENST00000498626.1,ENST00000263168.3,ENST00000485542.5,ENST00000476820.1,ENST00000476936.5,ENST00000466066.1	processed_transcript,protein_coding	4.39819e-05	0.000119011	-1.57168	7.74414	5.87868e-05	0.000240007	0.336139	8.60683	0.0653007	0.20005
ENSG00000235299	MRPL53P1	ENST00000414323.2	processed_pseudogene	0.60401	0.680069	3.00207	-2.62279	1	1	-5.12548e-15	-3.2253	1	1
ENSG00000155363	MOV10	ENST00000369645.5,ENST00000369644.5,ENST00000495374.5,ENST00000468624.5,ENST00000413052.6,ENST00000465579.1,ENST00000490413.1,ENST00000486416.1,ENST00000357443.2,ENST00000479858.1,ENST00000481711.1,ENST00000475429.5,ENST00000494319.1,ENST00000488160.5,ENST00000482545.5,ENST00000471160.5,ENST00000496577.5	processed_transcript,protein_coding	2.86048e-16	1.85144e-15	-0.374058	5.17772	0.238245	0.4068	-0.656975	5.16295	0.000854737	0.00425971
ENSG00000155366	RHOC	ENST00000534717.5,ENST00000468093.5,ENST00000484054.3,ENST00000369632.6,ENST00000339083.11,ENST00000369636.6,ENST00000285735.6,ENST00000478447.1,ENST00000436685.6,ENST00000369637.5,ENST00000414971.1,ENST00000484280.6,ENST00000369638.6,ENST00000425265.6,ENST00000528831.5,ENST00000369633.6,ENST00000527563.1,ENST00000473074.1,ENST00000369642.7	nonsense_mediated_decay,retained_intron,protein_coding	1.59544e-18	1.15743e-17	2.3928	3.2587	3.29815e-11	2.79949e-10	-0.841231	1.4572	0.0705129	0.212729
ENSG00000271810	RP11-426L16.10	ENST00000606505.5,ENST00000607158.5,ENST00000471038.6,ENST00000605933.5,ENST00000606954.1	nonsense_mediated_decay,processed_transcript,retained_intron,protein_coding	0.0369144	0.0627395	4.4265	-2.31559	0.190109	0.331684	-5.12548e-15	-3.2253	1	1
ENSG00000155367	PPM1J	ENST00000486709.1,ENST00000482367.1,ENST00000309276.10,ENST00000471106.5,ENST00000464951.1	nonsense_mediated_decay,retained_intron,protein_coding	1.73306e-52	3.4005e-51	9.65648	1.68813	4.97352e-24	1.07029e-22	3.6805	-2.76623	0.283029	0.635084
ENSG00000184599	FAM19A3	ENST00000361886.3,ENST00000369630.7	protein_coding	1.16763e-15	7.29341e-15	7.44038	-0.549792	1.92854e-07	1.09595e-06	3.6819	-2.7661	0.283029	0.635084
ENSG00000215866	LINC01356	ENST00000401018.5,ENST00000433505.5,ENST00000449572.2	lincRNA	0.494683	0.592312	1.03072	-2.47703	1	1	-2.34027	-3.05521	1	1
ENSG00000224167	RP3-522D1.1	ENST00000456651.1,ENST00000422022.1	lincRNA	0.0508256	0.0829256	4.39582	-2.31757	0.190109	0.331684	-5.12548e-15	-3.2253	1	1
ENSG00000228040	RP3-522D1.2	ENST00000416137.1	processed_pseudogene	0.0840511	0.130787	4.39582	-2.31757	0.190109	0.331684	2.30325	-3.05558	1	1
ENSG00000155380	SLC16A1	ENST00000478835.1,ENST00000538576.5,ENST00000443580.5,ENST00000369626.7,ENST00000458229.5,ENST00000481750.1,ENST00000429288.1	processed_transcript,protein_coding	4.80743e-07	1.59302e-06	1.65343	8.12413	7.29368e-10	5.37783e-09	0.644911	7.53946	0.00319627	0.0140667
ENSG00000229020	AKR7A2P1	ENST00000460134.2	processed_pseudogene	0.389485	0.491077	0	-2.80372	1	1	-5.12548e-15	-3.2253	1	1
ENSG00000238198	RP11-31F15.2	ENST00000421157.1	lincRNA	1.08828e-07	3.82398e-07	2.43661	0.383875	1.21108e-05	5.45917e-05	-1.50857	-1.26963	0.0530226	0.16728
ENSG00000198799	LRIG2	ENST00000470000.1,ENST00000361127.5,ENST00000466161.1,ENST00000492207.5,ENST00000466069.5	processed_transcript,protein_coding	0.35427	0.452705	-0.10811	6.21413	0.678206	0.942069	-0.0821236	6.33206	0.656365	1
ENSG00000237278	RLIMP2	ENST00000427891.2	processed_pseudogene	0.410314	0.512732	0	-2.80372	1	1	-5.12548e-15	-3.2253	1	1
ENSG00000233839	RP11-389O22.4	ENST00000457967.1	processed_pseudogene	0.0654369	0.104313	0	-2.80372	1	1	-5.12548e-15	-3.2253	1	1
ENSG00000236887	RP11-389O22.5	ENST00000412567.1	processed_pseudogene	0.676096	0.736638	0	-2.80372	1	1	2.30325	-3.05558	1	1
ENSG00000081026	MAGI3	ENST00000369617.8,ENST00000477955.1,ENST00000486456.1,ENST00000369615.5,ENST00000369611.4,ENST00000307546.13	processed_transcript,protein_coding	3.30141e-188	3.77304e-186	8.27935	5.46165	8.35054e-79	3.10718e-76	6.62964	3.94482	2.11677e-75	1.96338e-73
ENSG00000232499	RP11-512F24.1	ENST00000424736.2	processed_pseudogene	0.0735736	0.116133	1.51279	-0.358566	0.0505403	0.113208	0.844429	-0.554519	0.156943	0.408127
ENSG00000116793	PHTF1	ENST00000412670.1,ENST00000357783.6,ENST00000472612.5,ENST00000446739.1,ENST00000481652.1,ENST00000369604.5,ENST00000369600.5,ENST00000493212.1,ENST00000486855.1,ENST00000474926.5,ENST00000393357.6,ENST00000369598.5	processed_transcript,protein_coding	8.89878e-05	0.00023189	0.284107	5.20054	0.270214	0.455121	-0.413044	4.96794	0.037123	0.123473
ENSG00000232450	RP4-730K3.3	ENST00000413412.1	transcribed_processed_pseudogene	0.00339985	0.00710988	0.804477	0.253308	0.355357	0.538216	-0.790172	-0.34132	0.210149	0.514166
ENSG00000081019	RSBN1	ENST00000369581.2,ENST00000261441.9,ENST00000615321.1,ENST00000616024.4,ENST00000476412.5,ENST00000612242.4	nonsense_mediated_decay,processed_transcript,protein_coding	0.068549	0.108873	0.617595	6.02404	0.0199807	0.0502659	0.421859	6.01695	0.0360648	0.120436
ENSG00000134242	PTPN22	ENST00000529045.1,ENST00000460620.5,ENST00000538253.5,ENST00000469077.1,ENST00000532224.5,ENST00000528414.5,ENST00000525799.1,ENST00000534519.1,ENST00000420377.6,ENST00000484147.5,ENST00000359785.9	nonsense_mediated_decay,processed_transcript,retained_intron,protein_coding	0.000563772	0.00132594	0.690625	5.62404	0.120598	0.232675	-0.854953	4.9827	0.00288311	0.0128156
ENSG00000188761	BCL2L15	ENST00000488450.1,ENST00000471267.1,ENST00000486485.1,ENST00000393320.3,ENST00000393316.7,ENST00000369580.3	processed_transcript,retained_intron,protein_coding	0.210244	0.284113	-0.196131	-0.291926	0.891473	1	0.569564	0.0770691	0.215788	0.525351
ENSG00000134262	AP4B1	ENST00000489499.5,ENST00000484201.5,ENST00000462591.1,ENST00000369569.5,ENST00000369567.5,ENST00000472122.1,ENST00000369571.2,ENST00000369564.5,ENST00000432415.5,ENST00000460653.1,ENST00000489092.5,ENST00000479801.1,ENST00000256658.8,ENST00000479285.5	processed_transcript,protein_coding	0.00440228	0.00904714	0.0855698	4.91199	0.799399	1	0.513015	5.25345	0.00527723	0.0220401
ENSG00000118655	DCLRE1B	ENST00000466480.1,ENST00000369563.3	processed_transcript,protein_coding	6.49519e-18	4.58619e-17	-2.80642	4.75403	7.38904e-19	1.15173e-17	-0.542804	5.39178	0.00209008	0.00957654
ENSG00000235527	HIPK1-AS1	ENST00000427953.5,ENST00000426237.2	retained_intron	8.48592e-41	1.30239e-39	4.09822	2.49192	6.13372e-22	1.15731e-20	-0.737049	-0.580405	0.249858	0.593223
ENSG00000163349	HIPK1	ENST00000626993.2,ENST00000369558.5,ENST00000426820.6,ENST00000369561.8,ENST00000340480.8,ENST00000503968.1,ENST00000369555.6,ENST00000361587.3,ENST00000369559.8,ENST00000514621.5,ENST00000369553.5	protein_coding	0.0193908	0.0351123	-0.31695	7.26875	0.257456	0.435905	0.257716	7.65817	0.226045	0.546208
ENSG00000116774	OLFML3	ENST00000491700.1,ENST00000369551.5,ENST00000320334.4,ENST00000633022.1,ENST00000393300.6	processed_transcript,protein_coding	0.378586	0.479241	0.617446	-1.62286	0.830199	1	0.357091	-1.76612	0.807883	1
ENSG00000282048	RP4-590F24.2	ENST00000632517.1	sense_intronic	0.153714	0.225222	3.88882	-2.46187	0.312854	0.479929	-5.12548e-15	-3.2253	1	1
ENSG00000134207	SYT6	ENST00000610222.1,ENST00000607941.5,ENST00000610121.5,ENST00000608203.1,ENST00000609117.5,ENST00000608879.1,ENST00000369547.5,ENST00000609577.1,ENST00000610096.1	nonsense_mediated_decay,protein_coding	2.78324e-05	7.70779e-05	0.771558	-1.4632	0.604741	0.857257	-4.87998	-2.31739	0.022562	0.079795
ENSG00000232895	RP4-543J13.1	ENST00000420156.2	lincRNA	0.690476	0.748832	-1.93121	-2.63801	1	1	-2.34027	-3.05521	1	1
ENSG00000273698	MRPL57P1	ENST00000621486.1	processed_pseudogene	0.779382	0.81884	0	-2.80372	1	1	-5.12548e-15	-3.2253	1	1
ENSG00000197323	TRIM33	ENST00000358465.6,ENST00000478032.1,ENST00000476908.1,ENST00000448034.5,ENST00000369543.6,ENST00000492227.1	processed_transcript,protein_coding	0.918847	0.924626	-0.105976	6.90026	0.707258	0.973427	0.0109368	7.06287	0.945079	1
ENSG00000226984	RP4-591B8.2	ENST00000427409.1	processed_pseudogene	0.174239	0.241276	3.8541	-2.46383	0.312854	0.479929	-5.12548e-15	-3.2253	1	1
ENSG00000236480	PKMP1	ENST00000455804.1	processed_pseudogene	0.302317	0.393035	0	-2.80372	1	1	3.15156	-2.90353	0.52202	0.980779
ENSG00000116752	BCAS2	ENST00000369541.3,ENST00000485021.1	processed_transcript,protein_coding	0.488373	0.587318	-0.632917	4.94901	0.114818	0.225174	-0.246201	5.20907	0.266123	0.623506
ENSG00000175984	DENND2C	ENST00000481894.1,ENST00000393274.5,ENST00000493549.1,ENST00000393276.7,ENST00000393277.2,ENST00000495031.5	processed_transcript,protein_coding	1.33125e-19	1.02085e-18	4.23457	1.72444	1.13791e-08	7.42214e-08	1.91105	0.0376494	0.000244155	0.0013335
ENSG00000116748	AMPD1	ENST00000637080.1,ENST00000485564.3,ENST00000639077.1,ENST00000639274.1,ENST00000520113.6,ENST00000638214.1,ENST00000369538.3	nonsense_mediated_decay,processed_transcript,retained_intron,protein_coding	1.48486e-06	4.70031e-06	6.5457	-1.22637	0.00206201	0.00648368	2.30325	-3.05558	1	1
ENSG00000213281	NRAS	ENST00000369535.4	protein_coding	0.000347027	0.000837408	-1.41281	6.41562	5.84486e-05	0.000238687	0.193073	7.15476	0.291537	0.648625
ENSG00000009307	CSDE1	ENST00000529046.5,ENST00000530784.1,ENST00000530886.5,ENST00000261443.9,ENST00000610726.4,ENST00000525970.5,ENST00000533818.5,ENST00000525878.5,ENST00000369530.5,ENST00000483407.1,ENST00000483030.1,ENST00000524652.1,ENST00000339438.10,ENST00000525132.1,ENST00000438362.6,ENST00000534699.5,ENST00000358528.8,ENST00000534389.2	processed_transcript,retained_intron,protein_coding	0.00963676	0.0183717	-1.13122	8.90299	0.0111547	0.0297359	0.29982	9.62279	0.0824163	0.241425
ENSG00000052723	SIKE1	ENST00000506320.1,ENST00000462123.5,ENST00000475335.5,ENST00000471969.1,ENST00000369528.9,ENST00000369524.5,ENST00000060969.5,ENST00000474562.1,ENST00000510745.5,ENST00000466657.1	processed_transcript,retained_intron,protein_coding	0.790927	0.828385	-0.186812	6.33128	0.581146	0.827917	0.3074	6.6879	0.058486	0.181709
ENSG00000227970	NR1H5P	ENST00000452683.1	unitary_pseudogene	0.61423	0.680069	2.96192	-2.62475	1	1	-5.12548e-15	-3.2253	1	1
ENSG00000198765	SYCP1	ENST00000493377.1,ENST00000369522.7,ENST00000482717.5,ENST00000369518.1,ENST00000477590.1,ENST00000477215.5,ENST00000468191.1,ENST00000613524.4,ENST00000618516.4,ENST00000455987.5	processed_transcript,protein_coding	0.61423	0.680069	2.96192	-2.62475	1	1	-5.12548e-15	-3.2253	1	1
ENSG00000134198	TSPAN2	ENST00000369516.6,ENST00000491992.1,ENST00000369515.6,ENST00000433172.3	processed_transcript,protein_coding	1.11894e-26	1.13419e-25	5.37733	0.145525	2.25135e-08	1.42125e-07	4.85537	0.0336343	2.49852e-06	1.84265e-05
ENSG00000233730	LINC01765	ENST00000448680.1	lincRNA	0.190986	0.2613	-2.73032	-2.48981	1	1	1.18636	-2.3185	0.598476	1
ENSG00000134259	NGF	ENST00000369512.2	protein_coding	0.61423	0.680069	2.96192	-2.62475	1	1	-5.12548e-15	-3.2253	1	1
ENSG00000226973	RP4-663N10.2	ENST00000457493.1	unprocessed_pseudogene	0.127601	0.190761	0	-2.80372	1	1	-5.12548e-15	-3.2253	1	1
ENSG00000270631	RP11-710N8.3	ENST00000605135.1	processed_pseudogene	0.61423	0.680069	2.96192	-2.62475	1	1	-5.12548e-15	-3.2253	1	1
ENSG00000173218	VANGL1	ENST00000369510.8,ENST00000474344.1,ENST00000478369.5,ENST00000355485.6,ENST00000369509.1,ENST00000310260.7	processed_transcript,protein_coding	1.10367e-12	5.75016e-12	-2.08426	3.97408	1.27611e-10	1.02319e-09	0.187283	4.82586	0.427278	0.878665
ENSG00000118729	CASQ2	ENST00000261448.5,ENST00000488931.1	processed_transcript,protein_coding	0.45974	0.559869	2.96192	-2.62475	1	1	-5.12548e-15	-3.2253	1	1
ENSG00000177551	NHLH2	ENST00000320238.3,ENST00000429731.1,ENST00000369506.1	protein_coding	6.47746e-05	0.000171688	5.63457	-1.82846	0.00967474	0.0260819	-5.12548e-15	-3.2253	1	1
ENSG00000163393	SLC22A15	ENST00000369502.1,ENST00000369503.8,ENST00000481127.1	processed_transcript,protein_coding	1.2077e-18	8.82539e-18	0.696977	4.22347	0.0316361	0.0754083	1.61491	4.96792	4.3234e-05	0.00026817
ENSG00000173212	MAB21L3	ENST00000464946.1,ENST00000369500.3	processed_transcript,protein_coding	0.0480885	0.0789184	4.0898	-1.47622	0.0416207	0.0951739	2.49783	-2.22594	0.11286	0.313207
ENSG00000235933	LINC01779	ENST00000426515.1	lincRNA	0.00777619	0.0151795	4.81342	-2.18143	0.0791691	0.163057	-5.12548e-15	-3.2253	1	1
ENSG00000163399	ATP1A1	ENST00000495965.1,ENST00000488733.1,ENST00000295598.9,ENST00000369496.8,ENST00000479960.1,ENST00000463382.1,ENST00000418797.5,ENST00000537345.5,ENST00000369494.5,ENST00000491156.1,ENST00000440951.1	processed_transcript,retained_intron,protein_coding	8.06919e-07	2.6204e-06	0.999808	8.83785	0.0001484	0.000567156	0.713961	8.76144	0.000375183	0.001994
ENSG00000203865	ATP1A1-AS1	ENST00000493908.1,ENST00000608511.5	processed_transcript	1.46961e-05	4.19887e-05	2.42603	1.03091	2.23423e-07	1.26005e-06	0.586303	0.0395633	0.279525	0.635084
ENSG00000233154	LINC01762	ENST00000434879.1,ENST00000430316.5,ENST00000423907.5,ENST00000430107.1,ENST00000437308.5,ENST00000443219.5	lincRNA	0.0159324	0.029333	3.22809	-1.95084	0.0387526	0.089705	3.24842	-1.83493	0.0436792	0.141787
ENSG00000230381	RP4-655J12.5	ENST00000449303.2	lincRNA	0.661444	0.724116	0	-2.80372	1	1	2.30325	-3.05558	1	1
ENSG00000224950	RP5-1086K13.1	ENST00000456414.2	lincRNA	0.129895	0.193855	-0.196582	0.63846	0.732506	1	0.337233	0.943197	0.385976	0.814939
ENSG00000116815	CD58	ENST00000369489.9,ENST00000369487.3,ENST00000526981.1,ENST00000464088.5,ENST00000457047.6	nonsense_mediated_decay,protein_coding	1.24821e-06	3.98353e-06	0.221561	4.02191	0.448619	0.664037	-1.39364	3.48173	3.42128e-08	3.12893e-07
ENSG00000177173	NAP1L4P1	ENST00000319092.5	processed_pseudogene	0.00286192	0.00604976	-1.49485	1.2134	0.116298	0.227729	-1.23781	1.23938	0.00322879	0.0141983
ENSG00000143061	IGSF3	ENST00000369483.5,ENST00000481589.1,ENST00000318837.6,ENST00000369486.7	protein_coding	1.91121e-75	5.5098e-74	7.16801	-0.770567	5.47251e-06	2.5913e-05	9.54905	1.39151	4.97441e-28	1.50171e-26
ENSG00000223489	NEFHP1	ENST00000412845.1	processed_pseudogene	0.60401	0.680069	3.00207	-2.62279	1	1	-5.12548e-15	-3.2253	1	1
ENSG00000116824	CD2	ENST00000369477.1,ENST00000369478.3	protein_coding	1.36121e-17	9.50441e-17	-5.53016	-1.2738	0.0106123	0.0284107	-6.04426	-1.63824	0.00164404	0.00772531
ENSG00000225079	FTH1P22	ENST00000456305.2	processed_pseudogene	0.61423	0.680069	2.96192	-2.62475	1	1	-5.12548e-15	-3.2253	1	1
ENSG00000272715	RP4-753F5.1	ENST00000610171.1	lincRNA	0.61423	0.680069	2.96192	-2.62475	1	1	-5.12548e-15	-3.2253	1	1
ENSG00000134247	PTGFRN	ENST00000496699.1,ENST00000497385.1,ENST00000393203.2	processed_transcript,protein_coding	9.08878e-37	1.25309e-35	-0.808593	-0.516538	0.341699	0.519472	2.40378	1.2346	1.62119e-09	1.69647e-08
ENSG00000134256	CD101	ENST00000369470.1,ENST00000460180.1,ENST00000467588.1,ENST00000256652.8	processed_transcript,protein_coding	5.03399e-92	1.83471e-90	-1.36593	0.948017	0.0124492	0.0328149	-0.369351	1.24397	0.314903	0.691086
ENSG00000116830	TTF2	ENST00000463696.1,ENST00000427271.1,ENST00000480701.1,ENST00000369466.8,ENST00000492682.5,ENST00000469638.1,ENST00000470935.1	processed_transcript,protein_coding	5.07624e-05	0.000136241	-0.951492	6.77762	0.000257208	0.00094856	0.204228	7.38495	0.19404	0.480929
ENSG00000134253	TRIM45	ENST00000256649.8,ENST00000497970.5,ENST00000369461.3,ENST00000369464.7,ENST00000485032.1	nonsense_mediated_decay,protein_coding	0.000465837	0.00110683	-0.958829	2.3948	0.0123925	0.0326764	-0.345432	2.67525	0.314905	0.691086
ENSG00000228453	RPS15AP9	ENST00000439856.1	processed_pseudogene	0.82932	0.839791	0	-2.80372	1	1	-5.12548e-15	-3.2253	1	1
ENSG00000271427	RP11-188D8.1	ENST00000604156.1	lincRNA	0.0344804	0.0593115	0.160732	-1.04528	1	1	-0.158568	-1.18077	1	1
ENSG00000198162	MAN1A2	ENST00000421535.5,ENST00000356554.7,ENST00000482811.1,ENST00000422329.1,ENST00000449370.6	processed_transcript,protein_coding	0.038505	0.0651488	-0.796579	6.04647	0.00935579	0.0254514	-0.297683	6.35023	0.0578581	0.180074
ENSG00000226755	VPS25P1	ENST00000455691.2	processed_pseudogene	0.50853	0.60634	2.96192	-2.62475	1	1	-5.12548e-15	-3.2253	1	1
ENSG00000183508	FAM46C	ENST00000369448.3	protein_coding	1.34071e-36	1.83895e-35	2.40315	6.26088	4.85984e-17	6.66588e-16	2.16421	6.1783	2.83069e-27	8.3179e-26
ENSG00000213262	VDAC2P3	ENST00000430995.1	processed_pseudogene	0.61423	0.680069	2.96192	-2.62475	1	1	-5.12548e-15	-3.2253	1	1
ENSG00000228217	PNRC2P1	ENST00000423940.1	processed_pseudogene	0.737566	0.792603	-0.801655	-0.748871	0.353265	0.535326	-0.621622	-0.79834	0.396106	0.831935
ENSG00000196505	GDAP2	ENST00000494224.1,ENST00000464026.1,ENST00000493555.5,ENST00000369442.3,ENST00000491626.5,ENST00000369443.9	processed_transcript,protein_coding	0.647654	0.711977	0.633158	5.60801	0.120393	0.232546	0.349597	5.55127	0.0660284	0.201785
ENSG00000065183	WDR3	ENST00000471680.1,ENST00000369441.7,ENST00000487202.5,ENST00000349139.5	processed_transcript,protein_coding	1.6178e-08	6.13529e-08	-2.00636	6.14138	2.13885e-10	1.67548e-09	0.600118	7.2482	0.00203709	0.00936594
ENSG00000155761	SPAG17	ENST00000463628.1,ENST00000470550.1,ENST00000486589.1,ENST00000492438.5,ENST00000469128.1,ENST00000483383.1,ENST00000478697.5,ENST00000465053.1,ENST00000437255.1,ENST00000473472.1,ENST00000477444.1,ENST00000466857.5,ENST00000336338.9	processed_transcript,protein_coding	3.05927e-05	8.43282e-05	5.11779	-2.05747	0.0490569	0.11019	-5.12548e-15	-3.2253	1	1
ENSG00000226126	PSMC1P12	ENST00000436509.2	processed_pseudogene	0.710553	0.766275	-1.93442	-2.63768	1	1	0.811541	-2.76588	1	1
ENSG00000092607	TBX15	ENST00000369429.3,ENST00000449873.5,ENST00000207157.7	protein_coding	0.136819	0.203137	-0.152063	-1.56085	1	1	-0.999457	-1.90267	0.431103	0.884825
ENSG00000226172	RP4-712E4.1	ENST00000439394.1	lincRNA	0.423951	0.525444	-1.93121	-2.63801	1	1	-2.34027	-3.05521	1	1
ENSG00000116874	WARS2	ENST00000235521.4,ENST00000497761.1,ENST00000497402.1,ENST00000495746.5,ENST00000369426.9	processed_transcript,protein_coding	0.00458049	0.00937245	0.850993	4.70464	0.00301667	0.0091207	0.10376	4.38721	0.621479	1
ENSG00000223575	RBMX2P3	ENST00000450122.2	processed_pseudogene	0.146091	0.215284	0.272301	-1.99304	1	1	0.727719	-1.97768	0.5872	1
ENSG00000236804	RPS3AP12	ENST00000443616.1	processed_pseudogene	0.218135	0.293513	-0.0299234	-1.89662	1	1	1.67339	-1.31976	0.0469249	0.150354
ENSG00000227712	RP11-418J17.3	ENST00000457719.1	lincRNA	0.61423	0.680069	2.96192	-2.62475	1	1	-5.12548e-15	-3.2253	1	1
ENSG00000232650	LINC01780	ENST00000420059.5,ENST00000457683.1	lincRNA	0.186861	0.25627	3.8541	-2.46383	0.312854	0.479929	3.67911	-2.76635	0.283029	0.635084
ENSG00000116882	HAO2	ENST00000361035.8,ENST00000622548.4,ENST00000325945.3,ENST00000457318.5,ENST00000482991.1	processed_transcript,protein_coding	0.112965	0.170922	3.9239	-2.4599	0.312854	0.479929	3.15156	-2.90353	0.52202	0.980779
ENSG00000230921	HAO2-IT1	ENST00000419144.1	sense_intronic	0.814316	0.830765	0	-2.80372	1	1	2.30325	-3.05558	1	1
ENSG00000203858	HSD3BP2	ENST00000457615.1	unprocessed_pseudogene	0.360164	0.458759	0	-2.80372	1	1	-5.12548e-15	-3.2253	1	1
ENSG00000235595	GAPDHP23	ENST00000444823.1	processed_pseudogene	0.61423	0.680069	2.96192	-2.62475	1	1	-5.12548e-15	-3.2253	1	1
ENSG00000226443	GAPDHP32	ENST00000433816.1	processed_pseudogene	0.0391764	0.0655397	4.39582	-2.31757	0.190109	0.331684	-5.12548e-15	-3.2253	1	1
ENSG00000240244	GAPDHP33	ENST00000443168.1	processed_pseudogene	0.174239	0.241276	3.8541	-2.46383	0.312854	0.479929	-5.12548e-15	-3.2253	1	1
ENSG00000198857	HSD3BP5	ENST00000434856.1	transcribed_unprocessed_pseudogene	0.61423	0.680069	2.96192	-2.62475	1	1	-5.12548e-15	-3.2253	1	1
ENSG00000143067	ZNF697	ENST00000421812.2	protein_coding	5.81789e-81	1.81632e-79	4.46322	5.40423	3.89316e-45	2.44277e-43	1.56999	3.00856	4.45548e-09	4.44885e-08
ENSG00000092621	PHGDH	ENST00000369407.3,ENST00000482968.1,ENST00000493622.5,ENST00000462324.1,ENST00000369409.8,ENST00000469443.1,ENST00000496756.1	processed_transcript,protein_coding	4.87285e-10	2.1032e-09	-0.0698363	6.78187	0.805201	1	0.73495	7.33541	1.95034e-05	0.0001275
ENSG00000134240	HMGCS2	ENST00000476640.1,ENST00000544913.2,ENST00000472375.5,ENST00000369406.7	processed_transcript,protein_coding	0.61423	0.680069	2.96192	-2.62475	1	1	-5.12548e-15	-3.2253	1	1
ENSG00000134193	REG4	ENST00000530654.1,ENST00000256585.9,ENST00000354219.5,ENST00000369401.4	protein_coding	0.435449	0.536846	0	-2.80372	1	1	-5.12548e-15	-3.2253	1	1
ENSG00000134249	ADAM30	ENST00000369400.1	protein_coding	0.61423	0.680069	2.96192	-2.62475	1	1	-5.12548e-15	-3.2253	1	1
ENSG00000134250	NOTCH2	ENST00000489731.1,ENST00000479412.2,ENST00000478864.1,ENST00000256646.6,ENST00000640021.1,ENST00000493703.1,ENST00000602566.5,ENST00000579475.7	nonsense_mediated_decay,processed_transcript,retained_intron,protein_coding	0.000917186	0.00208733	0.313123	7.43298	0.224777	0.385842	0.552533	7.67756	0.00121897	0.00588786
ENSG00000273406	RP11-114O18.1	ENST00000608123.1	lincRNA	0.814316	0.830765	0	-2.80372	1	1	2.30325	-3.05558	1	1
ENSG00000265808	SEC22B	ENST00000578049.3,ENST00000618538.1	protein_coding	0.306347	0.397853	0.0529347	5.97556	0.884264	1	0.356258	6.24239	0.0454866	0.147057
ENSG00000274642	CH17-472G23.1	ENST00000612320.1	unprocessed_pseudogene	1.59121e-56	3.3654e-55	9.75813	1.81544	2.56955e-15	3.07155e-14	-5.12548e-15	-3.2253	1	1
ENSG00000223804	CH17-472G23.2	ENST00000621564.1,ENST00000613290.4,ENST00000616141.4,ENST00000617318.4	transcribed_unprocessed_pseudogene,processed_transcript	0.00338273	0.00707915	0.460862	0.852573	0.479844	0.704519	0.0762104	0.763166	0.901519	1
ENSG00000270392	PFN1P2	ENST00000621347.1,ENST00000604437.2	transcribed_processed_pseudogene,processed_transcript	0.000106784	0.000275128	5.85675	-1.72324	0.0108037	0.0288533	-5.12548e-15	-3.2253	1	1
ENSG00000270231	NBPF8	ENST00000583271.5	unprocessed_pseudogene	1.58917e-29	1.76391e-28	2.20536	4.35967	1.06526e-13	1.1295e-12	2.29568	4.5687	1.40701e-26	4.02722e-25
ENSG00000275131	CH17-472G23.4	ENST00000612480.2,ENST00000637601.1	transcribed_unprocessed_pseudogene,processed_transcript	2.69266e-63	6.33102e-62	5.10058	5.14229	4.12003e-21	7.42348e-20	1.5603	2.14193	3.52654e-07	2.87808e-06
ENSG00000273136	NBPF26	ENST00000609741.2,ENST00000620612.5,ENST00000617913.4,ENST00000611287.4,ENST00000624419.1,ENST00000615145.4,ENST00000615219.4,ENST00000611702.4,ENST00000619748.4	protein_coding	5.0539e-40	7.56076e-39	4.15458	4.30562	2.19884e-38	9.91026e-37	2.58355	3.03792	8.2405e-21	1.82615e-19
ENSG00000263353	PPIAL4A	ENST00000577856.2	protein_coding	0.157456	0.230031	0	-2.80372	1	1	-5.12548e-15	-3.2253	1	1
ENSG00000226067	LINC00623	ENST00000615424.4,ENST00000621058.4,ENST00000617702.1,ENST00000614062.1,ENST00000613486.1	lincRNA	1.06056e-15	6.64146e-15	-0.506785	1.32642	0.280596	0.470824	0.687271	1.96579	0.03269	0.110486
ENSG00000275585	CH17-118O6.3	ENST00000636462.1,ENST00000612313.1	transcribed_unprocessed_pseudogene,processed_transcript	0.00836335	0.0161085	4.78587	-2.18341	0.120517	0.232546	-5.12548e-15	-3.2253	1	1
ENSG00000198019	FCGR1B	ENST00000369384.8,ENST00000623603.3,ENST00000615565.4,ENST00000471609.2,ENST00000453173.2,ENST00000466915.1,ENST00000369383.8,ENST00000472543.5,ENST00000369178.5,ENST00000616817.4	nonsense_mediated_decay,processed_transcript,retained_intron,protein_coding	5.79359e-14	3.2686e-13	2.19688	-0.706779	0.0152111	0.0394069	2.08582	-0.529171	0.0376399	0.12505
ENSG00000223345	HIST2H2BA	ENST00000412169.1,ENST00000430394.1	transcribed_unprocessed_pseudogene,processed_transcript	0.0322368	0.0560976	2.42957	-1.85579	0.12076	0.232847	0.876267	-2.41821	0.703417	1
ENSG00000227193	RP11-439A17.4	ENST00000427872.1	lincRNA	0.699169	0.75637	0	-2.80372	1	1	-5.12548e-15	-3.2253	1	1
ENSG00000213244	HIST2H3DP1	ENST00000401004.2	unprocessed_pseudogene	0.412221	0.513192	1.1613	-2.20747	0.681087	0.942069	-0.0403223	-2.6403	1	1
ENSG00000188610	FAM72B	ENST00000452190.2,ENST00000471903.6,ENST00000619376.4,ENST00000468129.2,ENST00000369390.7,ENST00000616749.1,ENST00000355228.8	processed_transcript,protein_coding	0.7878	0.82714	-0.084135	4.36401	0.825338	1	0.0644586	4.53885	0.777617	1
ENSG00000171943	SRGAP2C	ENST00000367123.7,ENST00000412759.2,ENST00000304465.7,ENST00000613462.1,ENST00000617209.1	processed_transcript,protein_coding	2.69434e-27	2.78575e-26	2.81618	5.39568	6.33602e-19	9.92912e-18	1.44151	4.40689	3.29769e-08	3.02801e-07
ENSG00000227082	CH17-437K3.1	ENST00000417218.1	lincRNA	0.000624978	0.00146012	2.52172	-0.68441	0.00292429	0.00889043	-0.812671	-1.97678	0.611981	1
ENSG00000231429	RP11-343N15.2	ENST00000445260.2	lincRNA	0.00119635	0.0026824	6.02463	-1.54968	0.0468014	0.105975	-5.12548e-15	-3.2253	1	1
ENSG00000228826	RP11-344P13.4	ENST00000437523.2	lincRNA	0.424836	0.526337	1.5244	-1.68528	0.262687	0.443869	-0.960238	-2.41779	0.727741	1
ENSG00000272583	RP11-344P13.6	ENST00000609485.1	lincRNA	5.91978e-08	2.13855e-07	-3.42951	-0.603671	0.00552542	0.0157993	-3.26206	-0.864411	6.94736e-05	0.000417102
ENSG00000231752	EMBP1	ENST00000458200.2,ENST00000622787.4,ENST00000618253.1	transcribed_unprocessed_pseudogene,processed_transcript	0.000390705	0.000937153	-2.04144	0.937497	0.000413846	0.00147094	0.0109784	1.51607	1	1
ENSG00000277702	CH17-13I23.3	ENST00000622095.1	unprocessed_pseudogene	0.654299	0.71779	0	-2.80372	1	1	-5.12548e-15	-3.2253	1	1
ENSG00000264145	CH17-13I23.2	ENST00000582255.2	processed_pseudogene	0.61423	0.680069	2.96192	-2.62475	1	1	-5.12548e-15	-3.2253	1	1
ENSG00000203825	RP11-744H18.1	ENST00000449715.1	unprocessed_pseudogene	0.776051	0.81884	0	-2.80372	1	1	-5.12548e-15	-3.2253	1	1
ENSG00000179571	NBPF17P	ENST00000401087.3	unprocessed_pseudogene	0.000303076	0.000738252	4.05595	-1.55193	0.0024947	0.00769079	2.2758	-2.31947	0.343453	0.741498
ENSG00000232721	RP11-403I13.5	ENST00000443018.2	lincRNA	0.293179	0.382148	0	-2.80372	1	1	-5.12548e-15	-3.2253	1	1
ENSG00000223779	RP11-403I13.4	ENST00000442049.2	unprocessed_pseudogene	0.853139	0.862519	-0.650632	-2.11053	1	1	-1.80428	-2.52434	0.420257	0.867919
ENSG00000242352	FAM91A3P	ENST00000456826.2	transcribed_processed_pseudogene	0.565677	0.667588	-3.61731	-2.23446	0.312854	0.479929	-1.80436	-2.52435	0.403742	0.843416
ENSG00000263590	RP11-403I13.7	ENST00000424684.2	lincRNA	0.35066	0.448468	0	-2.80372	1	1	-5.12548e-15	-3.2253	1	1
ENSG00000233430	RP11-403I13.9	ENST00000449024.2	unprocessed_pseudogene	0.49187	0.590369	2.96192	-2.62475	1	1	-5.12548e-15	-3.2253	1	1
ENSG00000265531	FCGR1CP	ENST00000579737.3	unprocessed_pseudogene	3.26194e-13	1.7555e-12	4.01942	-0.979087	0.00165736	0.0052935	2.8093	-1.52689	0.00485931	0.0204737
ENSG00000234571	RP5-998N21.4	ENST00000415338.1	lincRNA	5.67757e-08	2.05546e-07	7.0534	-0.880352	7.54502e-06	3.50117e-05	3.14856	-2.90378	0.52202	0.980779
ENSG00000263513	FAM72C	ENST00000369175.4,ENST00000584486.5	protein_coding	0.00298386	0.00629133	-1.81611	1.42495	0.00100585	0.00333476	0.745253	2.4187	0.0205177	0.0737633
ENSG00000270872	SRGAP2D	ENST00000605551.2	unprocessed_pseudogene	1.23643e-16	8.20863e-16	3.08993	1.97606	3.49654e-11	2.96239e-10	1.34229	0.846787	0.00118236	0.00572487
ENSG00000271439	RP11-666A1.7	ENST00000605374.1	processed_pseudogene	0.174239	0.241276	3.8541	-2.46383	0.312854	0.479929	-5.12548e-15	-3.2253	1	1
ENSG00000237343	RP11-763B22.4	ENST00000455105.1	lincRNA	0.353792	0.452149	-1.93442	-2.63768	1	1	-2.34002	-3.05523	1	1
ENSG00000233586	RP11-763B22.3	ENST00000432512.1	processed_pseudogene	5.20843e-06	1.5638e-05	6.35577	-1.44376	0.0135439	0.0354755	-5.12548e-15	-3.2253	1	1
ENSG00000266338	NBPF15	ENST00000488031.6,ENST00000578953.1,ENST00000581897.6,ENST00000584575.2,ENST00000478419.5,ENST00000577412.5,ENST00000579734.6,ENST00000584793.6	processed_transcript,protein_coding	4.06377e-07	1.35657e-06	2.42838	3.15538	1.76246e-14	1.98447e-13	1.48878	2.58894	3.09256e-05	0.000195693
ENSG00000229002	RP11-666A1.4	ENST00000440916.1	unprocessed_pseudogene	0.174239	0.241276	3.8541	-2.46383	0.312854	0.479929	-5.12548e-15	-3.2253	1	1
ENSG00000224363	RP11-289H16.1	ENST00000441760.2	lincRNA	0.46424	0.564062	2.96192	-2.62475	1	1	-5.12548e-15	-3.2253	1	1
ENSG00000278273	RP11-763B22.11	ENST00000615237.1	unprocessed_pseudogene	0.644775	0.709494	0	-2.80372	1	1	-5.12548e-15	-3.2253	1	1
ENSG00000196369	SRGAP2B	ENST00000463366.1,ENST00000612199.4,ENST00000467933.2,ENST00000621582.1,ENST00000494534.1,ENST00000619678.1	nonsense_mediated_decay,processed_transcript,protein_coding	1.04072e-31	1.24034e-30	3.38476	4.4695	2.62512e-26	6.4223e-25	1.42029	2.9837	2.80957e-07	2.31956e-06
ENSG00000271644	RP3-365I19.2	ENST00000604134.1	processed_pseudogene	0.15829	0.230744	3.8541	-2.46383	0.312854	0.479929	-5.12548e-15	-3.2253	1	1
ENSG00000215784	FAM72D	ENST00000400889.2	protein_coding	0.976018	0.978096	-0.171698	3.14007	0.596888	0.847551	-0.185948	3.22758	0.478497	0.963255
ENSG00000283752	CH17-195P21.1	ENST00000640951.1	unprocessed_pseudogene	0.60401	0.680069	3.00207	-2.62279	1	1	-5.12548e-15	-3.2253	1	1
ENSG00000272419	RP11-403I13.8	ENST00000614510.4,ENST00000621798.4,ENST00000610324.1,ENST00000621033.1,ENST00000418192.2,ENST00000638217.1,ENST00000616993.1,ENST00000606004.5,ENST00000578899.5	transcribed_unprocessed_pseudogene,processed_transcript,retained_intron	3.62432e-47	6.3935e-46	4.7374	1.84471	5.7485e-21	1.03054e-19	4.62274	2.01245	3.42793e-19	6.91201e-18
ENSG00000223612	RP11-289I10.2	ENST00000433527.1	processed_pseudogene	0.334378	0.430834	2.42957	-1.85579	0.12076	0.232847	1.64748	-2.13832	0.234423	0.56225
ENSG00000276216	CH17-373J23.1	ENST00000618589.1	lincRNA	7.83348e-83	2.51174e-81	5.47149	6.30935	5.99098e-31	1.85767e-29	-0.618492	1.68574	0.343988	0.742304
ENSG00000236140	RP11-89F3.2	ENST00000427732.1	lincRNA	0.0857095	0.13307	-3.23969	-2.35634	0.541902	0.777653	-3.72154	-2.76541	0.283029	0.635084
ENSG00000162825	NBPF20	ENST00000622803.4,ENST00000620821.1,ENST00000369373.9,ENST00000594479.7,ENST00000392971.6	protein_coding	0.00633593	0.0126687	2.30394	2.00314	3.18834e-08	1.97995e-07	0.605044	1.02043	0.102535	0.289111
ENSG00000275064	CH17-262O2.1	ENST00000444680.3	unprocessed_pseudogene	0.483178	0.582867	3.00207	-2.62279	1	1	-5.12548e-15	-3.2253	1	1
ENSG00000272150	NBPF25P	ENST00000619932.4,ENST00000606775.2	transcribed_unprocessed_pseudogene,processed_transcript	0.0789446	0.123647	2.21533	0.146097	0.000267912	0.000984404	0.850396	-0.47227	0.162009	0.415041
ENSG00000117262	GPR89A	ENST00000524525.5,ENST00000492401.2,ENST00000465185.2,ENST00000460277.5,ENST00000466593.5,ENST00000528944.5,ENST00000527989.1,ENST00000313835.13,ENST00000478703.5,ENST00000462900.2,ENST00000534502.5,ENST00000532574.5,ENST00000493684.5	nonsense_mediated_decay,processed_transcript,retained_intron,protein_coding	4.72602e-08	1.72345e-07	1.81744	4.67259	6.03862e-08	3.63021e-07	0.502332	3.89827	0.0213947	0.0765035
ENSG00000174827	PDZK1	ENST00000417171.5,ENST00000465595.1,ENST00000451928.6,ENST00000429537.6,ENST00000443667.1,ENST00000344770.6,ENST00000466386.5	processed_transcript,protein_coding	0.282269	0.369613	1.92304	-1.51296	0.213673	0.368521	-0.958816	-2.41764	0.703417	1
ENSG00000117281	CD160	ENST00000369288.6,ENST00000401557.7,ENST00000235933.10,ENST00000584442.2,ENST00000616463.1	protein_coding	0.154837	0.226702	3.8541	-2.46383	0.312854	0.479929	3.14856	-2.90378	0.52202	0.980779
ENSG00000265491	RNF115	ENST00000582693.4,ENST00000539368.2	retained_intron,protein_coding	7.98771e-06	2.353e-05	-1.2435	5.75502	4.99229e-06	2.37905e-05	-0.443079	6.13885	0.00611254	0.025161
ENSG00000186141	POLR3C	ENST00000489436.1,ENST00000466003.1,ENST00000479819.1,ENST00000471254.5,ENST00000334163.3,ENST00000369294.5	processed_transcript,protein_coding	0.030889	0.053931	0.816908	6.27038	0.00279998	0.00853814	0.244352	6.04227	0.137629	0.370874
ENSG00000186364	NUDT17	ENST00000498192.5,ENST00000444015.2,ENST00000334513.5,ENST00000460879.5,ENST00000477878.5	processed_transcript,retained_intron,protein_coding	0.031386	0.054727	-0.0112269	2.58465	1	1	-0.515866	2.45384	0.0742744	0.222522
ENSG00000131788	PIAS3	ENST00000498436.2,ENST00000475261.1,ENST00000393046.3,ENST00000484423.5,ENST00000393045.6,ENST00000463514.2,ENST00000472114.5,ENST00000369299.7,ENST00000369298.5	retained_intron,protein_coding	0.365365	0.464269	-0.414399	4.34274	0.126051	0.242231	0.249896	4.76015	0.182337	0.457129
ENSG00000198483	ANKRD35	ENST00000544626.2,ENST00000355594.8	protein_coding	1.87715e-08	7.07107e-08	2.07477	-0.559078	0.0788617	0.163057	2.0677	-0.274371	0.0127812	0.0485286
ENSG00000143127	ITGA10	ENST00000539363.2,ENST00000481236.1,ENST00000369304.7,ENST00000468261.1	processed_transcript,retained_intron,protein_coding	0.264397	0.348967	1.09688	0.245134	0.095741	0.192905	-0.647777	-0.416529	0.327131	0.712557
ENSG00000131779	PEX11B	ENST00000428634.1,ENST00000369306.7,ENST00000537888.1	protein_coding	0.534597	0.634019	-0.00980001	4.44433	0.985275	1	0.347587	4.73591	0.0593325	0.183959
ENSG00000265241	RBM8A	ENST00000498663.5,ENST00000632040.1,ENST00000634130.1,ENST00000632555.1,ENST00000633781.1,ENST00000583313.6,ENST00000634161.1,ENST00000369307.4,ENST00000484825.1	nonsense_mediated_decay,retained_intron,protein_coding	7.38463e-05	0.000194508	-1.3235	6.737	1.57881e-05	7.00039e-05	-0.427067	7.15574	0.00564743	0.0234333
ENSG00000211451	GNRHR2	ENST00000604273.1,ENST00000312753.9,ENST00000581100.6,ENST00000619161.5,ENST00000361928.2	processed_transcript,transcribed_unitary_pseudogene	4.92222e-05	0.000132318	1.08297	0.0020723	0.0624242	0.135852	-0.305198	-0.524529	0.711014	1
ENSG00000280778	CH17-270A2.2	ENST00000625258.1,ENST00000630636.1	processed_transcript,protein_coding	5.45683e-21	4.44888e-20	3.68494	1.46283	6.55475e-13	6.51808e-12	0.667227	-0.498576	0.233308	0.56029
ENSG00000271601	LIX1L	ENST00000604000.3	protein_coding	1.16034e-20	9.327e-20	-2.9783	5.02901	1.30614e-22	2.55012e-21	0.361607	6.12684	0.0273298	0.0947613
ENSG00000272031	ANKRD34A	ENST00000619519.1,ENST00000619813.1,ENST00000606888.2	protein_coding	5.52348e-07	1.81824e-06	2.70869	1.95859	2.20436e-07	1.2443e-06	1.42604	1.18548	0.023796	0.0836046
ENSG00000121851	POLR3GL	ENST00000471706.1,ENST00000622508.4,ENST00000369313.7,ENST00000369314.1	retained_intron,protein_coding	0.0847015	0.131677	-1.24792	2.11452	0.00446814	0.0130851	0.203059	2.72735	0.465905	0.943246
ENSG00000265972	TXNIP	ENST00000425134.2,ENST00000488537.1,ENST00000582401.5,ENST00000486597.1	retained_intron,protein_coding	1.00213e-08	3.88283e-08	-2.78982	6.68198	5.1391e-18	7.56793e-17	0.546022	7.88301	0.138012	0.371592
ENSG00000168509	HFE2	ENST00000421822.2,ENST00000634927.1,ENST00000636675.1,ENST00000497365.5,ENST00000357836.5,ENST00000475797.1,ENST00000336751.10	protein_coding	0.00722096	0.0142075	4.84104	-2.17945	0.0791691	0.163057	-5.12548e-15	-3.2253	1	1
ENSG00000233396	LINC01719	ENST00000457465.3,ENST00000612371.4,ENST00000619720.1,ENST00000452883.5,ENST00000611275.4,ENST00000610820.4	lincRNA	3.7152e-06	1.13074e-05	1.47858	-0.837407	0.147711	0.279425	-5.37974	-2.05397	0.00343007	0.0150154
ENSG00000271425	NBPF10	ENST00000617010.2,ENST00000583866.8	protein_coding	0.0898121	0.138746	-0.550669	1.81483	0.212745	0.367036	0.036697	2.12782	0.901317	1
ENSG00000213240	RP11-458D21.5	ENST00000612520.1	nonsense_mediated_decay	0.140453	0.207886	0	-2.80372	1	1	-5.12548e-15	-3.2253	1	1
ENSG00000264343	NOTCH2NL	ENST00000578207.5,ENST00000579793.6,ENST00000362074.7,ENST00000479995.2	processed_transcript,protein_coding	3.04176e-05	8.38743e-05	-2.58713	1.08781	5.57742e-06	2.63825e-05	-0.0822491	1.69966	0.814405	1
ENSG00000276509	CH17-353B19.1	ENST00000622359.1	lincRNA	0.240165	0.319932	-3.61731	-2.23446	0.312854	0.479929	-0.959916	-2.41777	0.714218	1
ENSG00000277406	CH17-385C13.2	ENST00000618406.1	unprocessed_pseudogene	5.60749e-06	1.67858e-05	-3.61508	-2.23477	0.312854	0.479929	-4.10907	-2.63973	0.158698	0.408127
ENSG00000270339	CH17-385C13.3	ENST00000584068.3	protein_coding	0.0809658	0.12654	-1.93121	-2.63801	1	1	-2.34027	-3.05521	1	1
ENSG00000277420	CH17-408M7.1	ENST00000621489.1	lincRNA	0.0847407	0.131717	2.96192	-2.62475	1	1	2.30325	-3.05558	1	1
ENSG00000276975	HYDIN2	ENST00000614586.2,ENST00000493714.1,ENST00000496036.1	transcribed_unprocessed_pseudogene,processed_transcript	1.33256e-05	3.82782e-05	4.30246	-1.38861	0.00178494	0.0056783	-2.34002	-3.05523	1	1
ENSG00000268043	NBPF12	ENST00000617614.4,ENST00000617844.4,ENST00000611443.4,ENST00000617931.4,ENST00000613714.2,ENST00000439206.6,ENST00000617864.3,ENST00000579935.8	protein_coding	1.37484e-09	5.70844e-09	1.22301	5.41304	3.34378e-05	0.00014148	-0.702442	4.48518	0.00136011	0.00649121
ENSG00000244371	PFN1P8	ENST00000497012.2	processed_pseudogene	0.0391764	0.0655397	4.39582	-2.31757	0.190109	0.331684	-5.12548e-15	-3.2253	1	1
ENSG00000234225	RP4-704D21.2	ENST00000455718.2,ENST00000425109.2	lincRNA	0.0822475	0.12823	0	-2.80372	1	1	-5.12548e-15	-3.2253	1	1
ENSG00000227242	NBPF13P	ENST00000444082.2	unprocessed_pseudogene	0.605024	0.680069	0	-2.80372	1	1	-5.12548e-15	-3.2253	1	1
ENSG00000225603	RP11-325P15.1	ENST00000435000.2	processed_pseudogene	0.39254	0.494421	-1.93442	-2.63768	1	1	-2.34002	-3.05523	1	1
ENSG00000230832	RP11-325P15.2	ENST00000438469.2	processed_pseudogene	3.97415e-35	5.2464e-34	7.86913	1.87708	9.38075e-12	8.3991e-11	-2.34027	-3.05521	1	1
ENSG00000283342	NBPF13P	ENST00000637142.1	unprocessed_pseudogene	0.0762259	0.119832	-3.24218	-2.35603	0.541902	0.777653	-3.72133	-2.76543	0.283029	0.635084
ENSG00000131791	PRKAB2	ENST00000496858.1,ENST00000254101.3,ENST00000474939.1	processed_transcript,protein_coding	0.458984	0.559869	-0.290415	4.19363	0.30395	0.479929	0.37721	4.62879	0.0572644	0.178481
ENSG00000273071	RP11-337C18.10	ENST00000606856.1	processed_transcript	0.00209216	0.00451384	1.05962	1.44151	0.0102159	0.027439	-0.776274	0.684611	0.118816	0.327233
ENSG00000131781	FMO5	ENST00000533848.2,ENST00000369272.7,ENST00000533174.5,ENST00000619062.1,ENST00000578284.5,ENST00000441068.6,ENST00000527849.5,ENST00000254090.8,ENST00000478432.1	nonsense_mediated_decay,processed_transcript,retained_intron,protein_coding	1.86117e-05	5.25291e-05	1.63721	1.00572	0.00301754	0.00912161	1.64067	1.2374	0.000852307	0.00425024
ENSG00000180867	PDIA3P1	ENST00000471856.1	processed_pseudogene	0.0221038	0.0395971	-1.57082	1.18232	0.0021767	0.00678694	-1.19819	1.23907	0.00145176	0.00688548
ENSG00000226015	CCT8P1	ENST00000413611.2	processed_pseudogene	0.00179431	0.00390094	-2.46459	-1.26332	0.0836355	0.171549	1.39141	-0.227872	0.00833422	0.0331793
ENSG00000236806	RPL7AP15	ENST00000446956.1	processed_pseudogene	0.288787	0.377144	2.96192	-2.62475	1	1	2.30325	-3.05558	1	1
ENSG00000131778	CHD1L	ENST00000369258.8,ENST00000469625.2,ENST00000431239.5,ENST00000361293.9,ENST00000485113.5,ENST00000492728.1,ENST00000467213.5,ENST00000369259.4,ENST00000622533.4,ENST00000488864.5,ENST00000639534.1	nonsense_mediated_decay,processed_transcript,retained_intron,protein_coding	2.53827e-11	1.20637e-10	-1.81632	6.01478	1.94561e-10	1.53047e-09	0.304103	6.91048	0.0574768	0.179038
ENSG00000213226	RP11-337C18.4	ENST00000435270.2	processed_pseudogene	0.118126	0.178069	0	-2.80372	1	1	-5.12548e-15	-3.2253	1	1
ENSG00000226653	OR13Z1P	ENST00000416141.2	unitary_pseudogene	0.797688	0.829111	0	-2.80372	1	1	-5.12548e-15	-3.2253	1	1
ENSG00000116128	BCL9	ENST00000497938.1,ENST00000234739.7,ENST00000473292.1	processed_transcript,protein_coding	1.29114e-08	4.94037e-08	0.682546	2.8024	0.0346491	0.0819673	1.25723	3.30467	4.01717e-07	3.24948e-06
ENSG00000162836	ACP6	ENST00000493129.2,ENST00000613673.4,ENST00000583509.6,ENST00000614551.1,ENST00000487562.5,ENST00000609196.5,ENST00000460583.1,ENST00000392988.6,ENST00000611629.4,ENST00000620634.4	nonsense_mediated_decay,retained_intron,protein_coding	0.0820048	0.127899	-0.358825	3.82655	0.243797	0.415239	0.534377	4.37797	0.0676415	0.206067
ENSG00000265107	GJA5	ENST00000430508.1,ENST00000621517.1,ENST00000579774.2	protein_coding	0.0326372	0.0563803	4.48841	-2.31164	0.190109	0.331684	-5.12548e-15	-3.2253	1	1
ENSG00000223728	RP11-314N2.2	ENST00000458399.2	processed_pseudogene	0.776051	0.81884	0	-2.80372	1	1	-5.12548e-15	-3.2253	1	1
ENSG00000121634	GJA8	ENST00000369235.1	protein_coding	0.61423	0.680069	2.96192	-2.62475	1	1	-5.12548e-15	-3.2253	1	1
ENSG00000188092	GPR89B	ENST00000490955.1,ENST00000468618.6,ENST00000314163.11,ENST00000461786.5,ENST00000491975.5,ENST00000488165.5,ENST00000478307.5,ENST00000488603.5	nonsense_mediated_decay,retained_intron,protein_coding	3.6119e-09	1.44892e-08	1.85443	4.70502	2.34385e-10	1.82801e-09	0.197255	3.73149	0.401973	0.842323
ENSG00000273059	XXyac-YX155B6.7	ENST00000610161.1	lincRNA	0.251909	0.334139	-0.175166	-1.28645	1	1	1.33161	-0.642892	0.0645673	0.198097
ENSG00000274372	RP11-94I2.4	ENST00000614663.4,ENST00000617309.1	lincRNA	0.0632256	0.101186	0.381029	-0.108116	0.643451	0.905633	0.466103	0.021658	0.357336	0.764559
ENSG00000263956	NBPF11	ENST00000614015.4,ENST00000613531.1,ENST00000614506.4,ENST00000614785.4,ENST00000615281.4	nonsense_mediated_decay,protein_coding	0.337547	0.434545	0.542747	4.31157	0.0418085	0.0955896	0.046171	4.15134	0.832231	1
ENSG00000198658	ABHD17AP1	ENST00000358206.4	unprocessed_pseudogene	2.90078e-12	1.46945e-11	3.88946	-0.687908	1.83738e-05	8.06201e-05	3.0254	-0.979977	0.000179115	0.00100538
ENSG00000227733	RP4-565E6.1	ENST00000496508.1,ENST00000611286.4,ENST00000634551.1,ENST00000596091.5,ENST00000599387.5,ENST00000596220.1,ENST00000611617.5,ENST00000616018.1,ENST00000611452.4,ENST00000629702.3,ENST00000622642.4,ENST00000614606.4,ENST00000464343.6,ENST00000628902.1,ENST00000620213.4,ENST00000599640.5,ENST00000482381.2,ENST00000628063.2	lincRNA	0.00149305	0.00328324	5.11779	-2.05747	0.0490569	0.11019	-5.12548e-15	-3.2253	1	1
ENSG00000232265	XXyac-YX155B6.5	ENST00000411978.1,ENST00000595367.5,ENST00000594699.5,ENST00000595668.5,ENST00000599864.5,ENST00000597931.5,ENST00000608244.1,ENST00000594189.2,ENST00000618809.1,ENST00000432038.1	lincRNA	2.59969e-09	1.05517e-08	-5.52258	-1.27584	0.010209	0.0274227	-6.04525	-1.63809	0.00166494	0.00781317
ENSG00000234283	LINC01731	ENST00000428035.1	lincRNA	0.0546018	0.0885002	4.45737	-2.31361	0.190109	0.331684	2.30325	-3.05558	1	1
ENSG00000228626	RP11-495P10.9	ENST00000441281.1	unprocessed_pseudogene	0.60401	0.680069	3.00207	-2.62279	1	1	-5.12548e-15	-3.2253	1	1
ENSG00000274020	LINC01138	ENST00000614292.1,ENST00000445201.2,ENST00000639159.1,ENST00000434245.3,ENST00000638958.1,ENST00000640832.1,ENST00000639181.1,ENST00000622328.1,ENST00000440862.2,ENST00000613452.1	lincRNA,retained_intron	6.83364e-48	1.22166e-46	3.99166	4.35702	9.76548e-33	3.31664e-31	2.3561	3.04989	2.60459e-15	4.22009e-14
ENSG00000238107	RP11-495P10.5	ENST00000427169.1	lincRNA	0.19783	0.269558	3.00207	-2.62279	1	1	-5.12548e-15	-3.2253	1	1
ENSG00000235988	RP11-495P10.4	ENST00000452108.1	processed_pseudogene	0.034663	0.0594896	2.46461	-2.19646	0.190109	0.331684	1.33745	-2.64079	0.656024	1
ENSG00000224481	RP11-495P10.3	ENST00000452996.1	lincRNA	0.108298	0.164477	3.88882	-2.46187	0.312854	0.479929	2.30325	-3.05558	1	1
ENSG00000272824	RP6-74O6.6	ENST00000609678.1	lincRNA	0.000436916	0.00104128	-1.93121	-2.63801	1	1	3.56568	-1.64256	0.00835078	0.0332369
ENSG00000231551	RP11-495P10.1	ENST00000635493.1,ENST00000634549.1,ENST00000635587.1,ENST00000445243.1,ENST00000426101.5,ENST00000640776.1,ENST00000634638.1	transcribed_unprocessed_pseudogene,processed_transcript	0.0149919	0.0277323	1.93696	0.50267	0.000251503	0.000928376	0.173544	-0.319199	0.778841	1
ENSG00000225871	RP11-495P10.10	ENST00000454544.2	processed_pseudogene	0.256003	0.338965	1.94752	-1.7651	0.230048	0.394044	-1.41668	-2.63996	0.656024	1
ENSG00000236334	PPIAL4G	ENST00000419275.2	protein_coding	0.468374	0.567812	2.96192	-2.62475	1	1	-5.12548e-15	-3.2253	1	1
ENSG00000270629	NBPF14	ENST00000581201.5,ENST00000614329.4,ENST00000621066.4,ENST00000616120.4,ENST00000620240.1,ENST00000611826.4,ENST00000606877.2,ENST00000621070.4,ENST00000614999.4,ENST00000619423.4,ENST00000593495.2	protein_coding	3.08554e-07	1.04087e-06	1.72366	4.37328	6.74427e-10	4.99229e-09	0.877513	3.90593	0.00458843	0.0194425
ENSG00000275140	CH17-478G19.2	ENST00000616023.1	unprocessed_pseudogene	0.710461	0.766202	-2.72752	-2.49013	1	1	-0.887136	-2.76576	1	1
ENSG00000178104	PDE4DIP	ENST00000530130.2,ENST00000530062.5,ENST00000613995.4,ENST00000369354.7,ENST00000617454.4,ENST00000524974.5,ENST00000479369.6,ENST00000534466.1,ENST00000313431.13,ENST00000585156.5,ENST00000621371.4,ENST00000527901.1,ENST00000528060.1,ENST00000469668.2,ENST00000369347.8,ENST00000533845.1,ENST00000617527.4,ENST00000369351.7,ENST00000617248.4,ENST00000618504.4,ENST00000620605.4,ENST00000526664.5,EN…	nonsense_mediated_decay,processed_transcript,retained_intron,protein_coding	1.28139e-19	9.83557e-19	2.13059	5.60776	1.46544e-09	1.05073e-08	-0.221023	4.19731	0.284325	0.637367
ENSG00000254539	RP4-791M13.3	ENST00000466343.2	lincRNA	0.198156	0.269921	0	-2.80372	1	1	-5.12548e-15	-3.2253	1	1
ENSG00000269713	NBPF9	ENST00000615421.4,ENST00000621074.4,ENST00000621645.4,ENST00000611593.1,ENST00000613969.4,ENST00000613595.4,ENST00000483630.5,ENST00000610300.4,ENST00000584027.8	retained_intron,protein_coding	0.000127455	0.000325062	2.03006	3.7412	6.64069e-08	3.96755e-07	1.44229	3.43636	1.92178e-09	1.99666e-08
ENSG00000274019	CH17-78J1.1	ENST00000622818.1	unprocessed_pseudogene	0.174239	0.241276	3.8541	-2.46383	0.312854	0.479929	-5.12548e-15	-3.2253	1	1
ENSG00000274265	CH17-189H20.1	ENST00000619653.1,ENST00000612135.1,ENST00000611769.4	lincRNA	0.00025779	0.000633585	0.202971	2.12772	0.655181	0.920359	-1.18673	1.66256	0.00199059	0.00917322
ENSG00000215861	WI2-1896O14.1	ENST00000313342.8	unprocessed_pseudogene	1.59626e-19	1.21939e-18	2.16331	0.195096	0.000277654	0.00101735	-2.98141	-1.46851	0.00231453	0.0104923
ENSG00000272755	RP11-326G21.1	ENST00000610119.1	lincRNA	0.111532	0.168988	-4.5573	-1.83389	0.0899163	0.182467	-0.44952	-1.76592	0.8712	1
ENSG00000274423	RP11-544O24.2	ENST00000618702.1	unprocessed_pseudogene	0.420411	0.521906	0	-2.80372	1	1	2.30325	-3.05558	1	1
ENSG00000271383	NBPF19	ENST00000611931.4,ENST00000621744.4,ENST00000426482.3,ENST00000612881.4,ENST00000578189.1,ENST00000369227.7	protein_coding	0.00108811	0.00245156	1.19311	4.52801	6.82668e-05	0.000276034	0.860956	4.4286	0.00029532	0.00159229
ENSG00000277147	LINC00869	ENST00000435115.5,ENST00000610297.1,ENST00000620190.1,ENST00000429388.5,ENST00000622695.1,ENST00000439719.5,ENST00000610578.4,ENST00000430442.2,ENST00000622079.1,ENST00000621156.1	lincRNA	7.63827e-13	4.01816e-12	0.375306	2.31307	0.286966	0.479929	1.77106	3.35842	7.58364e-12	9.6262e-11
ENSG00000275557	RP11-353N4.6	ENST00000617712.1	lincRNA	0.00631251	0.0126258	1.64127	0.0556792	0.0373234	0.0869692	1.26573	0.0568056	0.0170362	0.0625108
ENSG00000234232	RP11-353N4.5	ENST00000636533.1,ENST00000636086.1,ENST00000622585.1,ENST00000609662.2,ENST00000617878.2,ENST00000615436.2	transcribed_unprocessed_pseudogene,processed_transcript	0.00454055	0.00929547	5.06943	-2.05945	0.102611	0.203504	-5.12548e-15	-3.2253	1	1
ENSG00000226500	RP11-196G18.1	ENST00000451620.2	processed_pseudogene	0.61423	0.680069	2.96192	-2.62475	1	1	-5.12548e-15	-3.2253	1	1
ENSG00000150337	FCGR1A	ENST00000489704.1,ENST00000489479.1,ENST00000369168.4,ENST00000444948.5	processed_transcript,protein_coding	3.39598e-23	3.03382e-22	1.64268	0.0727875	0.00646498	0.0181792	1.99583	0.564235	1.91245e-05	0.000125304
ENSG00000203814	HIST2H2BF	ENST00000369167.2,ENST00000620458.1,ENST00000469483.1,ENST00000545683.1,ENST00000420462.1	processed_transcript,protein_coding	1.11315e-22	9.76718e-22	0.934704	8.56865	0.00198047	0.00624631	0.979071	8.70307	5.28641e-05	0.000323918
ENSG00000183598	HIST2H3D	ENST00000331491.1	protein_coding	1.0854e-34	1.4119e-33	2.67467	7.92767	9.2392e-17	1.2355e-15	1.16254	6.84789	0.00233255	0.010565
[truncated: 42,106 more rows]
